# Supplementary material for: VERA-ARAB: unveiling the Arabic tweets credibility by constructing balanced news dataset for veracity analysis
Source: PeerJ journal article supplement (doi:10.7717/peerj-cs.2432), 2024-10-30
Supplement: Codebook.zip [file Codebook.zip]

## Sheet: Sheet1
tweet_id	possibly_sensitive	retweet_count	reply_count	like_count	quote_count	bookmark_count	impression_count	user_id	lang	annotations_text	annotations_text (ENGLISH)	annotations_type	hashtags	hashtags (ENGLISH)	mentions	urls	urls_titles	urls_desc	context_domain	context_domain_desc	context_entity	context_entity_desc	copyright	withheld_country_codes	created_at	is_edit_eligible	text	text (ENGLISH)	reply_settings	label	user_created_at	user_description	user_description (ENGLISH)	user_description_urls	user_description_hashtags	user_description_hashtags (ENGLISH)	user_description_mentions	location	location (ENGLISH)	protected	followers_count	following_count	tweet_count	listed_count	user_like_count	verified	claim_id	text_arabic	text_arabic (ENGLISH)
1580968020566212611	FALSE	8	1	148	0	0	0	1432300055290126080	ar	['إبراهيم تراوري']	['Ibrahim Traoré']	['Person']	['بوركينا_فاسو']	['Burkina_Faso']	[]	['https://twitter.com/radioalginter/status/1580968020566212611/photo/1']	[]	[]	[]	[]	[]	[]	TRUE	[]	2022-10-14 17:05:23	TRUE	⚡⚡تسمية النقيب إبراهيم تراوري رئيسا انتقاليا في #بوركينا_فاسو🇧🇫. https://t.co/x1RfJmjGaT	⚡⚡Captain Ibrahim Traoré has been appointed as the interim president in #Burkina_Faso🇧🇫. https://t.co/x1RfJmjGaT	everyone	0	2021-08-30 11:12:34	الحساب الرسمي لإذاعة الجزائر الدولية The official account of Radio Algeria International	The official account of Radio Algeria International	[]	[]		[]	Algiers الجزائر	Algeria	FALSE	265826	42	45661	174	193	TRUE	89	تسمية النقيب إبراهيم تراوري رئيسا انتقاليا في بوركينا فاسو.	Captain Ibrahim Traoré has been appointed as the interim president of Burkina Faso.
1461834696887877635	FALSE	66	17	450	6	1	0	1432300055290126080	ar	['وزارة التعليم']	['Ministry of Education']	['Organization']	['المغرب']	['Morocco']	[]	['https://twitter.com/radioalginter/status/1461834696887877635/video/1']	[]	[]	[]	[]	[]	[]	TRUE	[]	2021-11-19 23:12:05	TRUE	🔴🎥 #المغرب..طلبة فاس يخرجون في مسيرة احتجاجية ضد شروط وزارة التعليم في مسابقة الأساتذة من ضمنها الانتقاء الأولي و تحديد السن بثلاثين عاما. https://t.co/s0Z3GiJjmr	🔴🎥 #Morocco.. Students in Fez take to the streets in a protest march against the Ministry of Education's conditions in the teachers' competition, including the initial selection and setting the age limit at thirty years. https://t.co/s0Z3GiJjmr	everyone	0	2021-08-30 11:12:34	الحساب الرسمي لإذاعة الجزائر الدولية The official account of Radio Algeria International	The official account of Radio Algeria International	[]	[]		[]	Algiers الجزائر	Algeria	FALSE	265826	42	45661	174	193	TRUE	394	المغرب..طلبة فاس يخرجون في مسيرة احتجاجية ضد شروط وزارة التعليم في مسابقة الأساتذة من ضمنها الانتقاء الأولي و تحديد السن بثلاثين عاما.	Morocco... Students in Fez take to the streets in a protest march against the Ministry of Education's conditions in the teachers' competition, including the initial selection and setting the age limit at thirty years.
1500400852791697414	FALSE	0	0	45	0	0	0	1432300055290126080	ar	['بيشاور']	['Peshawar']	['Place']	['باكستان']	['Pakistan']	[]	['https://twitter.com/radioalginter/status/1500400852791697414/photo/1']	[]	[]	[]	[]	[]	[]	TRUE	[]	2022-03-06 09:20:14	TRUE	🔴#باكستان🇵🇰.. ارتفاع حصيلة ضحايا التفجير الذي وقع أول أمس الجمعة داخل مسجد في مدينة بيشاور شمال غربي البلاد إلى 63 قتيلا. https://t.co/AiJOq0p3aN	🔴#Pakistan🇵🇰.. The death toll from the explosion inside a mosque in the city of Peshawar, northwestern Pakistan, last Friday, has risen to 63 dead. https://t.co/AiJOq0p3aN	everyone	0	2021-08-30 11:12:34	الحساب الرسمي لإذاعة الجزائر الدولية The official account of Radio Algeria International	The official account of Radio Algeria International	[]	[]		[]	Algiers الجزائر	Algeria	FALSE	265826	42	45661	174	193	TRUE	524	باكستان.. ارتفاع حصيلة ضحايا التفجير الذي وقع أول أمس الجمعة داخل مسجد في مدينة بيشاور شمال غربي البلاد إلى 63 قتيلا.	Pakistan... The death toll from the explosion that occurred last Friday inside a mosque in the city of Peshawar, northwestern Pakistan, has risen to 63 dead.
1692644773692113202	FALSE	3	2	36	1	1	4507	1525516876159361024	ar	['الكويت']	['Kuwait']	['Place']	['ام_قصر_عراقيه', 'خور_عبدالله_التميمي_عراقية']	['Umm_Qasr_Iraqi', 'Khor_Abdullah_Al-Tamimi_Iraqi']	[]	['https://twitter.com/antfadt/status/1692644773692113202/video/1']	[]	[]	[]	[]	[]	[]	TRUE	[]	2023-08-18 21:08:56	TRUE	الكويت اول دولة خليجيه تعلن افلاسها #ام_قصر_عراقيه #خور_عبدالله_التميمي_عراقية https://t.co/hC64zP4lMs	Kuwait is the first Gulf country to declare bankruptcy #Umm_Qasr_Iraqi #Khor_Abdullah_Al-Tamimi_Iraqi https://t.co/hC64zP4lMs	everyone	1	2022-05-14 16:43:22	السلام الجمهوري العراقي السلام الجمهوري الوطني الشرعي للعراق https://t.co/iCUJbBGGq6	The national anthem of Iraq The legitimate national anthem of Iraq https://t.co/iCUJbBGGq6	['https://youtu.be/2wO7dSdwYX0']	[]		[]			FALSE	11905	5827	3996	8	6414	FALSE	55	الكويت اول دولة خليجيه تعلن افلاسها ام قصر عراقيه خور عبدالله التميمي عراقية	Kuwait is the first Gulf country to declare bankruptcy, Umm Qasr is Iraqi, Khor Abdullah is Iraqi Al-Tamimi.
1662741926423011330	FALSE	33	8	214	3	3	13291	1525516876159361024	ar	['إيران']	['Iran']	['Place']	[]	[]	[]	['https://twitter.com/antfadt/status/1662741926423011330/video/1']	[]	[]	['Sports Event', 'Events [Entity Service]', 'Cricket Match']	['', 'Real world events. ', 'Sports Event specific to Cricket matches']	['Chennai Super Kings vs Lucknow Super Giants', 'Chennai Super Kings vs Lucknow Super Giants', 'Chennai Super Kings vs Lucknow Super Giants']	['', '', '']	TRUE	[]	2023-05-28 08:45:42	TRUE	طالبان تدمير ما مجموعه 18 منشأة حدودية إيرانية كان الحرس الثوري قد نفذ هجمات إرهابية من هذه البؤر الاستيطانية الضخمة، إيران لم تقم بمقاومة قوية حتى الآن... https://t.co/Nx2yMIPeAi	Taliban The destruction of a total of 18 Iranian border facilities from which the Revolutionary Guards launched terrorist attacks from these massive settlements. Iran has not yet mounted a strong resistance... https://t.co/Nx2yMIPeAi	everyone	1	2022-05-14 16:43:22	السلام الجمهوري العراقي السلام الجمهوري الوطني الشرعي للعراق https://t.co/iCUJbBGGq6	The national anthem of Iraq The legitimate national anthem of Iraq https://t.co/iCUJbBGGq6	['https://youtu.be/2wO7dSdwYX0']	[]		[]			FALSE	11905	5827	3996	8	6414	FALSE	269	طالبان تدمير ما مجموعه 18 منشأة حدودية إيرانية كان الحرس الثوري قد نفذ هجمات إرهابية من هذه البؤر الاستيطانية الضخمة، إيران لم تقم بمقاومة قوية حتى الآن...	Taliban: The destruction of a total of 18 Iranian border facilities from which the Revolutionary Guards launched terrorist attacks. Iran has not mounted a strong resistance so far…
1645010457705558016	FALSE	3	7	68	1	0	17078	1525516876159361024	ar	['إيران', 'ايران', 'شارع نمر النمر', 'السعودية']	['Iran', 'Iran', 'Nimr al-Nimr Street', 'Saudi Arabia']	['Place', 'Place', 'Place', 'Place']	[]	[]	[]	['https://twitter.com/antfadt/status/1645010457705558016/photo/1']	[]	[]	[]	[]	[]	[]	TRUE	[]	2023-04-09 10:27:10	TRUE	إيران : السلطات الأمنيةفي ايران تزيل لوحة "شارع نمر النمر" التي كانت قد وضعتها مقابل القنصلية السعودية في مشهد ، قبيل وصول الوفد السعودي https://t.co/Wlw8LwOt8J	Iran: Iranian security authorities remove the 'Nimr Al-Nimr Street' sign that was placed opposite the Saudi consulate in Mashhad before the arrival of the Saudi delegation https://t.co/Wlw8LwOt8J	everyone	1	2022-05-14 16:43:22	السلام الجمهوري العراقي السلام الجمهوري الوطني الشرعي للعراق https://t.co/iCUJbBGGq6	The national anthem of Iraq The legitimate national anthem of Iraq https://t.co/iCUJbBGGq6	['https://youtu.be/2wO7dSdwYX0']	[]		[]			FALSE	11905	5827	3996	8	6414	FALSE	377	إيران : السلطات الأمنيةفي ايران تزيل لوحة شارع نمر النمر التي كانت قد وضعتها مقابل القنصلية السعودية في مشهد ، قبيل وصول الوفد السعودي	Iran: Iranian security authorities remove the 'Nimr Al-Nimr Street' sign that was placed opposite the Saudi consulate in Mashhad before the arrival of the Saudi delegation.
1696387235015163916	FALSE	134	21	352	11	19	37250	1248617521730608896	ar	['أليكس جونز']	['Alex Jones']	['Person']	['دبي']	['Dubai']	[]	['https://twitter.com/Tima_Yu/status/1696387235015163916/video/1']	[]	[]	[]	[]	[]	[]	TRUE	[]	2023-08-29 05:00:08	TRUE	خلال القمة العالمية للحكومات في #دبي تمّ خرق البث المباشر من قبل أليكس جونز وأنهال عليهم بالشتائم. https://t.co/jBQPd3RZG5	During the World Government Summit in #Dubai, the live broadcast was hacked by Alex Jones, who hurled insults at them. https://t.co/jBQPd3RZG5	everyone	1	2020-04-10 14:23:42	إذا فهمنا الماضي من البديهي أن نعرف ماذا يجري حولنا	If we understand the past, it becomes obvious to know what is happening around us.	[]	[]		[]			FALSE	32058	522	22162	57	45754	FALSE	20	خلال القمة العالمية للحكومات في دبي تمّ خرق البث المباشر من قبل أليكس جونز وأنهال عليهم بالشتائم.	During the World Government Summit in Dubai, the live broadcast was hacked by Alex Jones, who hurled insults at them.
1695751396551717050	FALSE	4	10	51	4	0	16167	544372344	ar	['محمد صلاح', 'ليفربول', 'صلاح']	['Mohamed Salah', 'Liverpool', 'Salah']	['Person', 'Organization', 'Person']	[]		[]	['https://twitter.com/Silvr_EPL/status/1695751396551717050/video/1']	[]	[]	['TV Shows', 'Sports Event', 'Sport', 'Sports League', 'Sports League', 'Events [Entity Service]', 'Soccer Match', 'Business Taxonomy', 'Unified Twitter Taxonomy', 'Unified Twitter Taxonomy', 'Unified Twitter Taxonomy', 'Unified Twitter Taxonomy', 'Person', 'Sport', 'Sports Team', 'Athlete', 'Unified Twitter Taxonomy', 'Unified Twitter Taxonomy', 'Unified Twitter Taxonomy', 'Unified Twitter Taxon…	['Television shows from around the world', '', 'Types of sports, like soccer and basketball', '', '', 'Real world events. ', 'Sports Event specific to Soccer matches', 'Categories within Brand Verticals that narrow down the scope of Brands', 'A taxonomy of user interests. ', 'A taxonomy of user interests. ', 'A taxonomy of user interests. ', 'A taxonomy of user interests. ', 'Named people in the …	['Premier League', 'Newcastle United vs Liverpool FC', 'Soccer', 'England - Soccer', 'Premier League', 'Newcastle United vs Liverpool FC', 'Newcastle United vs Liverpool FC', 'Sports & Fitness Business', 'Premier League', 'Soccer', 'Sports', 'News', 'Mohamed Salah', 'Soccer', 'Liverpool FC', 'Mohamed Salah', 'Liverpool FC', 'Soccer', 'Mohamed Salah', 'Sports', 'Premier League']	['', '', '', '', '', '', '', 'Brands, companies, advertisers and every non-person handle with the profit intent related to sports nutrition, athletic apparel, sports apps, fitness venues', '', '', 'Sports', 'News', '', '', '', '', '', '', '', 'Sports', '']	TRUE	[]	2023-08-27 10:53:33	TRUE	🎥 محمد صلاح ينشر فديو عبر حسابه في التيك توك مُعلقاً فيه حول أخبار رحيله عن ليفربول : " صلاح باقي " https://t.co/FVUGr1P6Qi	🎥 Mohamed Salah posts a video on his TikTok account commenting on the news of his departure from Liverpool: 'Salah is staying' https://t.co/FVUGr1P6Qi	everyone	1	2012-04-03 13:54:04	هنا أخبار #الدوري_الانجليزي أول بـ أول و نقل المباريات وأهم الاحداث و الاحصائيات. تابعنا فقط سنضعك في قلب الحدث . للأعلانات التواصل عبر @3bdullah_Ghali	Here are the latest #Premier_League news, live match updates, major events, and statistics. Follow us and stay at the heart of the action. For advertisements, contact @3bdullah_Ghali.	[]	['الدوري_الانجليزي']	['Premier_League']	[]	Saudi Arabia	Saudi Arabia	FALSE	574018	264	114934	1140	141	FALSE	32	محمد صلاح ينشر فديو عبر حسابه في التيك توك مُعلقاً فيه حول أخبار رحيله عن ليفربول : صلاح باقي	Mohamed Salah posts a video on his TikTok account commenting on the news of his departure from Liverpool: 'Salah is staying.'
1675111924437069824	FALSE	83	253	624	54	70	508255	1075449928539927040	ar	['مصر']	['Egypt']	['Place']	[]		[]	['https://twitter.com/metropolmedya_/status/1674772264695242752/video/1']	[]	[]	[]	[]	[]	[]	TRUE	[]	2023-07-01 11:59:39	TRUE	سمك قرش يسبح تحت قارب أحد السياح في مصر🤯!https://t.co/PGOtBKGI6H	A shark swims under a tourist's boat in Egypt 🤯! https://t.co/PGOtBKGI6H	everyone	1	2018-12-19 17:56:58	مصدرك الأول لأهم الأخبار الترفيهية والمنوّعة، والمقاطع الشائعة 🔥 للإعلانات👇🏻:	Your primary source for the most important entertainment and variety news, and trending clips 🔥 For advertisements👇🏻:	[]	[]		[]			FALSE	2447096	365	55725	1299	4207	FALSE	158	سمك قرش يسبح تحت قارب أحد السياح في مصر	A shark swims under a tourist's boat in Egypt.
1690445799878959104	FALSE	33	63	445	30	15	125922	1075449928539927040	ar	['محمد صلاح', 'صلاح', 'افريقيا']	['Mohamed Salah', 'Salah', 'Africa']	['Person', 'Person', 'Place']	[]		[]	['https://twitter.com/OLYAN15K/status/1690440154094108673/video/1']	[]	[]	['Person', 'Business Taxonomy', 'Athlete', 'Unified Twitter Taxonomy', 'Unified Twitter Taxonomy', 'Unified Twitter Taxonomy', 'Person', 'Athlete', 'Unified Twitter Taxonomy', 'Unified Twitter Taxonomy', 'Unified Twitter Taxonomy']	['Named people in the world like Nelson Mandela', 'Categories within Brand Verticals that narrow down the scope of Brands', 'An athlete in the world, like Serena Williams or Lionel Messi', 'A taxonomy of user interests. ', 'A taxonomy of user interests. ', 'A taxonomy of user interests. ', 'Named people in the world like Nelson Mandela', 'An athlete in the world, like Serena Williams or Lionel Me…	['Sadio Mane', 'Sports & Fitness Business', 'Sadio Mane', 'Soccer', 'Sadio Mane', 'Sports', 'Mohamed Salah', 'Mohamed Salah', 'Soccer', 'Mohamed Salah', 'Sports']	['', 'Brands, companies, advertisers and every non-person handle with the profit intent related to sports nutrition, athletic apparel, sports apps, fitness venues', '', '', '', 'Sports', '', '', '', '', 'Sports']	TRUE	[]	2023-08-12 19:31:00	TRUE	ساديو ماني يرد على شخص سأله عن محمد صلاح: صلاح لا يمتلك كأس أفريقيا، والسنغال تملك افريقيا https://t.co/ajk3OOpw5p	Sadio Mané responds to someone who asked him about Mohamed Salah: Salah doesn’t have the Africa Cup, and Senegal owns Africa. https://t.co/ajk3OOpw5p	everyone	0	2018-12-19 17:56:58	مصدرك الأول لأهم الأخبار الترفيهية والمنوّعة، والمقاطع الشائعة 🔥 للإعلانات👇🏻:	Your primary source for the most important entertainment and variety news, and trending clips 🔥 For advertisements👇🏻:	[]	[]		[]			FALSE	2447096	365	55725	1299	4207	FALSE	75	ساديو ماني يرد على شخص سأله عن محمد صلاح: صلاح لا يمتلك كأس أفريقيا، والسنغال تملك افريقيا	Sadio Mané responds to someone who asked him about Mohamed Salah: 'Salah doesn’t have the Africa Cup, and Senegal owns Africa.'
[truncated: 39 more columns]
