# Supplementary material for: VERA-ARAB: unveiling the Arabic tweets credibility by constructing balanced news dataset for veracity analysis
Source: PeerJ Comput Sci. 2024 Oct 30;10:e2432. doi: 10.7717/peerj-cs.2432 (PMC11623204; doi:10.7717/peerj-cs.2432)
Supplement: Supplemental Information 1 [file peerj-cs-10-2432-s001.xlsx]

## Sheet: Sheet1
tweet_id	possibly_sensitive	retweet_count	reply_count	like_count	quote_count	bookmark_count	impression_count	user_id	lang	annotations_text	annotations_type	hashtags	mentions	urls	urls_titles	urls_desc	context_domain	context_domain_desc	context_entity	context_entity_desc	copyright	withheld_country_codes	created_at	is_edit_eligible	text	reply_settings	label	user_created_at	user_description	user_description_urls	user_description_hashtags	user_description_mentions	location	protected	followers_count	following_count	tweet_count	listed_count	user_like_count	verified	claim_id	text_arabic	text_length	emojis	emojis_count	emojis_total_count	annotations_count	organizations	organizations_count
1697950090223026335	TRUE	1	2	5	0	1	2105	1688239842239386112	ar	[]	[]	[]	[]	['https://twitter.com/cocosvin120533/status/1697950090223026335/video/1']	[]	[]	[]	[]	[]	[]	TRUE	[]	2023-09-02 12:30:22	FALSE	😰😱 البحرية الجزائرية تقتل مغاربة أمام أعين الناس و في وضح النهار https://t.co/jFffqvnSIT	everyone	1	2023-08-06 17:25:40	منشئ محتوى	[]	[]	[]	مراكش	FALSE	5	26	181	0	140	FALSE	1	البحرية الجزائرية تقتل مغاربة أمام أعين الناس و في وضح النهار	63	{'😱': 'face screaming in fear', '😰': 'anxious face with sweat'}	{'😱': 1, '😰': 1}	2	0	[]	0
1697935446666510767	FALSE	14	21	342	1	3	9203	492235460	ar	[]	[]	['وهران']	[]	['https://twitter.com/vivalalgerie7/status/1697935446666510767/video/1']	[]	[]	['Business Taxonomy', 'Business Taxonomy']	['Categories within Brand Verticals that narrow down the scope of Brands', 'Categories within Brand Verticals that narrow down the scope of Brands']	['Food & Beverage Business', 'Gaming Business']	['Brands, companies, advertisers and every non-person handle with the profit intent and related to foods & beverages such as snacks, soft drinks, beers.', 'Brands, companies, advertisers and every non-person handle with the profit intent related to offline and online games such as gaming consoles, tabletop games, video game publishers']	TRUE	[]	2023-09-02 11:32:11	TRUE	مداهمة قوات "البياري" و "الصاعقة" لأخط.ـر أحياء #وهران .. https://t.co/lCiPWWPl5S	everyone	1	2012-02-14 13:58:41	(مَنْ صَلَّى عَلَيَّ صَلَاةً صَلَّى اللَّهُ عَلَيْهِ بِهَا عَشْرًا) .. فضلا فعّـل الجرس 🛎 وتابعنا على حسابنا الإحتياطي @vivalalgeri8	[]	[]	[]		FALSE	588292	486	43946	121	44406	FALSE	2	مداهمة قوات البياري و الصاعقة لأخط.ـر أحياء وهران ..	53	{}	{}	0	0	[]	0
1620816468328972288	FALSE	32	148	390	4	2	30203	492235460	ar	[]	[]	['المغرب']	[]	['https://twitter.com/vivalalgerie7/status/1620816468328972288/photo/1']	[]	[]	['Sports League', 'Business Taxonomy', 'Unified Twitter Taxonomy', 'Unified Twitter Taxonomy', 'Unified Twitter Taxonomy', 'Unified Twitter Taxonomy', 'Unified Twitter Taxonomy']	['', 'Categories within Brand Verticals that narrow down the scope of Brands', 'A taxonomy of user interests. ', 'A taxonomy of user interests. ', 'A taxonomy of user interests. ', 'A taxonomy of user interests. ', 'A taxonomy of user interests. ']	["FIFA Men's World Cup", 'Sports & Fitness Business', 'Soccer', 'Sports', 'Sports events', "FIFA Men's World Cup", 'Events']	['', 'Brands, companies, advertisers and every non-person handle with the profit intent related to sports nutrition, athletic apparel, sports apps, fitness venues', '', 'Sports', '', '', '']	TRUE	[]	2023-02-01 16:08:54	TRUE	هل فعلا هذه هي تميمة كأس العالم للأندية المقامة حالياً في #المغرب ؟😳🤦‍♂️ https://t.co/bfhBHBBAKm	everyone	1	2012-02-14 13:58:41	(مَنْ صَلَّى عَلَيَّ صَلَاةً صَلَّى اللَّهُ عَلَيْهِ بِهَا عَشْرًا) .. فضلا فعّـل الجرس 🛎 وتابعنا على حسابنا الإحتياطي @vivalalgeri8	[]	[]	[]		FALSE	588292	486	43946	121	44406	FALSE	517	هل فعلا هذه هي تميمة كأس العالم للأندية المقامة حالياً في المغرب ؟	68	{'😳': 'flushed face', '🤦\u200d♂️': 'man facepalming'}	{'😳': 1, '🤦\u200d♂️': 1}	2	0	[]	0
1575998679198367744	FALSE	2	3	249	2	0	0	492235460	ar	['مجلس الأمن الروسي']	['Organization']	['روسيا']	[]	[]	[]	[]	[]	[]	[]	[]	TRUE	[]	2022-09-30 23:59:00	TRUE	نائب رئيس مجلس الأمن الروسي: إذا لم يتم قبول أوكرانيا في حلف الناتو فيمكننا قبولها في #روسيا. ما أمرّها من سخرية وإهانة 🤦‍♂️😅	everyone	1	2012-02-14 13:58:41	(مَنْ صَلَّى عَلَيَّ صَلَاةً صَلَّى اللَّهُ عَلَيْهِ بِهَا عَشْرًا) .. فضلا فعّـل الجرس 🛎 وتابعنا على حسابنا الإحتياطي @vivalalgeri8	[]	[]	[]		FALSE	588292	486	43946	121	44406	FALSE	758	نائب رئيس مجلس الأمن الروسي: إذا لم يتم قبول أوكرانيا في حلف الناتو فيمكننا قبولها في روسيا. ما أمرّها من سخرية وإهانة	120	{'😅': 'grinning face with sweat', '🤦\u200d♂️': 'man facepalming'}	{'😅': 1, '🤦\u200d♂️': 1}	2	1	['مجلس الأمن الروسي']	1
1697673466311262549	FALSE	2	46	151	3	12	165156	1566066774583435008	ar	['صلاح']	['Person']	[]	[]	['https://twitter.com/a5medv/status/1697673466311262549/photo/1']	[]	[]	[]	[]	[]	[]	TRUE	[]	2023-09-01 18:11:10	TRUE	🚨😨 - صورة صلاح في الكشف الطبي للإتحاد !! https://t.co/rGYcpYhO37	everyone	1	2022-09-03 14:14:16	Fútbol is the way - Liverpool, Seleção, Neymar and Leo Messi (كاتب وصحفي رياضي مستقل- أكتب ما يمثلني فقط) — 🇧🇷	[]	[]	[]	Leo Messi - New Brunswick	FALSE	89128	1138	60603	275	8069	FALSE	3	صورة صلاح في الكشف الطبي للإتحاد	36	{'🚨': 'police car light', '😨': 'fearful face'}	{'🚨': 1, '😨': 1}	2	1	[]	0
1654258843684052993	FALSE	7	2	74	0	3	7700	1566066774583435008	ar	['نابولي']	['Place']	[]	[]	['https://twitter.com/tackleduro/status/1654229404770246658/video/1']	[]	[]	[]	[]	[]	[]	TRUE	[]	2023-05-04 22:56:57	TRUE	احتفالات مدينة نابولي بعد تحقيق الدوري لأول مرة منذ 33 عام. ليست مُجرد لُعبة 💙💙💙 https://t.co/wulU5N1VCQ	everyone	1	2022-09-03 14:14:16	Fútbol is the way - Liverpool, Seleção, Neymar and Leo Messi (كاتب وصحفي رياضي مستقل- أكتب ما يمثلني فقط) — 🇧🇷	[]	[]	[]	Leo Messi - New Brunswick	FALSE	89128	1138	60603	275	8069	FALSE	323	احتفالات مدينة نابولي بعد تحقيق الدوري لأول مرة منذ 33 عام. ليست مُجرد لُعبة	80	{'💙': 'blue heart'}	{'💙': 3}	3	1	[]	0
1601648436150878210	FALSE	3	5	31	1	0	0	1566066774583435008	ar	['ليكيب', 'كريستيانو رونالدو']	['Person', 'Person']	[]	[]	['https://twitter.com/a5medv/status/1601648436150878210/photo/1']	[]	[]	['Sports Event', 'Sports Event', 'Person', 'Sport', 'Sports Team', 'Sports League', 'Sports League', 'Sports League', 'Events [Entity Service]', 'Events [Entity Service]', 'Sports Series', 'Soccer Match', 'Business Taxonomy', 'Athlete', 'Unified Twitter Taxonomy', 'Unified Twitter Taxonomy', 'Unified Twitter Taxonomy', 'Unified Twitter Taxonomy', 'Unified Twitter Taxonomy', 'Unified Twitter Taxon…	['', '', 'Named people in the world like Nelson Mandela', 'Types of sports, like soccer and basketball', 'A sports team organization, like Arsenal and the Boston Celtics', '', '', '', 'Real world events. ', 'Real world events. ', 'A grouping of sports events or series, for example 2014 pre-season, a tournament, or round', 'Sports Event specific to Soccer matches', 'Categories within Brand Vertica…	['2022 FIFA World Cup', 'Morocco vs Portugal', 'Cristiano Ronaldo', 'Soccer', 'Portugal', 'International - Soccer', '2022 FIFA World Cup', "FIFA Men's World Cup", '2022 FIFA World Cup', 'Morocco vs Portugal', '2022 FIFA World Cup', 'Morocco vs Portugal', 'Sports & Fitness Business', 'Cristiano Ronaldo', 'Portugal', 'Soccer', 'Cristiano Ronaldo', 'Sports', "Men's national soccer teams", 'Sports ev…	['', '', '', '', '', '', '', '', '', '', '', '', 'Brands, companies, advertisers and every non-person handle with the profit intent related to sports nutrition, athletic apparel, sports apps, fitness venues', '', '', '', '', 'Sports', 'National Soccer Teams', '', '', '']	TRUE	[]	2022-12-10 18:41:59	TRUE	🚨🚨🚨|| ليكيب : كريستيانو رونالدو أخبر زملاءه أنه سيعتزل كرة القدم الآن! https://t.co/8zRnarnmLV	everyone	1	2022-09-03 14:14:16	Fútbol is the way - Liverpool, Seleção, Neymar and Leo Messi (كاتب وصحفي رياضي مستقل- أكتب ما يمثلني فقط) — 🇧🇷	[]	[]	[]	Leo Messi - New Brunswick	FALSE	89128	1138	60603	275	8069	FALSE	599	ليكيب : كريستيانو رونالدو أخبر زملاءه أنه سيعتزل كرة القدم الآن	66	{'🚨': 'police car light'}	{'🚨': 3}	3	2	[]	0
1597211239062831104	FALSE	100	28	511	36	24	0	1566066774583435008	ar	['آرسين فينجر', 'البرتغال', 'نيمار', 'كريستيانو', 'ميسي', 'ميسي']	['Person', 'Organization', 'Person', 'Person', 'Person', 'Person']	[]	[]	['https://twitter.com/a5medv/status/1597211239062831104/photo/1']	[]	[]	['Sports Event', 'Sports Event', 'Sports Event', 'Person', 'Person', 'Person', 'Sport', 'Sports Team', 'Sports Team', 'Sports Team', 'Sports League', 'Sports League', 'Sports League', 'Events [Entity Service]', 'Events [Entity Service]', 'Events [Entity Service]', 'Sports Series', 'Soccer Match', 'Soccer Match', 'Business Taxonomy', 'Athlete', 'Athlete', 'Athlete', 'Unified Twitter Taxonomy', 'Un…	['', '', '', 'Named people in the world like Nelson Mandela', 'Named people in the world like Nelson Mandela', 'Named people in the world like Nelson Mandela', 'Types of sports, like soccer and basketball', 'A sports team organization, like Arsenal and the Boston Celtics', 'A sports team organization, like Arsenal and the Boston Celtics', 'A sports team organization, like Arsenal and the Boston C…	['2022 FIFA World Cup', 'Brazil vs Switzerland', 'Portugal vs Uruguay', 'Neymar ', 'Cristiano Ronaldo', 'Lionel Messi', 'Soccer', 'Portugal', 'Brazil', 'Argentina', 'International - Soccer', '2022 FIFA World Cup', "FIFA Men's World Cup", '2022 FIFA World Cup', 'Brazil vs Switzerland', 'Portugal vs Uruguay', '2022 FIFA World Cup', 'Brazil vs Switzerland', 'Portugal vs Uruguay', 'Sports & Fitness B…	['', '', '', '', '', '', '', '', '', '', '', '', '', '', '', '', '', '', '', 'Brands, companies, advertisers and every non-person handle with the profit intent related to sports nutrition, athletic apparel, sports apps, fitness venues', '', '', '', '', '', '', '', '', '', '', 'Sports', 'National Soccer Teams', '', '', '']	TRUE	[]	2022-11-28 12:50:08	TRUE	🗣️ آرسين فينجر : " بدلاء البرازيل و البرتغال الذي يدخلو بالشوط الثاني اعلى جودة و أفضل من أساسيين الارجنتين ومع ذالك لا نيمار و لا كريستيانو عليه نفس الضغط الذي على ميسي لتحقيق كأس العالم لا يوجد سبب إلا أن ذالك يبين لنا ميسي هو هرم كرة القدم و دائماً مطالب بالمستحيل." https://t.co/xmDlAGefGM	everyone	1	2022-09-03 14:14:16	Fútbol is the way - Liverpool, Seleção, Neymar and Leo Messi (كاتب وصحفي رياضي مستقل- أكتب ما يمثلني فقط) — 🇧🇷	[]	[]	[]	Leo Messi - New Brunswick	FALSE	89128	1138	60603	275	8069	FALSE	625	آرسين فينجر : بدلاء البرازيل و البرتغال الذي يدخلو بالشوط الثاني اعلى جودة و أفضل من أساسيين الارجنتين ومع ذالك لا نيمار و لا كريستيانو عليه نفس الضغط الذي على ميسي لتحقيق كأس العالم لا يوجد سبب إلا أن ذالك يبين لنا ميسي هو هرم كرة القدم و دائماً مطالب بالمستحيل.	267	{'🗣️': 'speaking head'}	{'🗣️': 1}	1	6	['البرتغال']	1
1596180795143487488	FALSE	23	3	135	2	2	0	1566066774583435008	ar	['سالم الدورسي', 'الزمالك', 'سالم']	['Person', 'Organization', 'Person']	[]	[]	['https://twitter.com/mmwdwd19/status/1593911717427396609/video/1']	[]	[]	['Person', 'Business Taxonomy', 'Athlete', 'Unified Twitter Taxonomy', 'Unified Twitter Taxonomy', 'Unified Twitter Taxonomy']	['Named people in the world like Nelson Mandela', 'Categories within Brand Verticals that narrow down the scope of Brands', 'An athlete in the world, like Serena Williams or Lionel Messi', 'A taxonomy of user interests. ', 'A taxonomy of user interests. ', 'A taxonomy of user interests. ']	['Shikabala ', 'Sports & Fitness Business', 'Shikabala ', 'Soccer', 'Shikabala ', 'Sports']	['', 'Brands, companies, advertisers and every non-person handle with the profit intent related to sports nutrition, athletic apparel, sports apps, fitness venues', '', '', '', 'Sports']	TRUE	[]	2022-11-25 16:35:31	TRUE	النجم السعودي سالم الدورسي : "مثلي الأعلى عربيًا هو شيكابالا لاعب الزمالك المصري" يا زين ما اختارت والله يابو سالم https://t.co/qUqi3OR4XD	everyone	1	2022-09-03 14:14:16	Fútbol is the way - Liverpool, Seleção, Neymar and Leo Messi (كاتب وصحفي رياضي مستقل- أكتب ما يمثلني فقط) — 🇧🇷	[]	[]	[]	Leo Messi - New Brunswick	FALSE	89128	1138	60603	275	8069	FALSE	631	النجم السعودي سالم الدورسي : مثلي الأعلى عربيًا هو شيكابالا لاعب الزمالك المصري يا زين ما اختارت والله يابو سالم	117	{}	{}	0	3	['الزمالك']	1
1589667516338798592	FALSE	4	7	107	1	1	0	1566066774583435008	ar	['تشيلسي', 'دروغبا']	['Organization', 'Person']	[]	[]	['https://twitter.com/a5medv/status/1589667516338798592/photo/1']	[]	[]	['Business Taxonomy', 'Sports Team', 'Unified Twitter Taxonomy', 'Unified Twitter Taxonomy', 'Unified Twitter Taxonomy']	['Categories within Brand Verticals that narrow down the scope of Brands', 'A sports team organization, like Arsenal and the Boston Celtics', 'A taxonomy of user interests. ', 'A taxonomy of user interests. ', 'A taxonomy of user interests. ']	['Sports & Fitness Business', 'Chelsea FC', 'Chelsea FC', 'Soccer', 'Sports']	['Brands, companies, advertisers and every non-person handle with the profit intent related to sports nutrition, athletic apparel, sports apps, fitness venues', '', '', '', 'Sports']	TRUE	[]	2022-11-07 17:14:05	FALSE	🚨 أسطورة تشيلسي ديدييه دروغبا يعتنق الإسلام https://t.co/vXttlwo642	everyone	1	2022-09-03 14:14:16	Fútbol is the way - Liverpool, Seleção, Neymar and Leo Messi (كاتب وصحفي رياضي مستقل- أكتب ما يمثلني فقط) — 🇧🇷	[]	[]	[]	Leo Messi - New Brunswick	FALSE	89128	1138	60603	275	8069	FALSE	673	أسطورة تشيلسي ديدييه دروغبا يعتنق الإسلام	43	{'🚨': 'police car light'}	{'🚨': 1}	1	2	['تشيلسي']	1
1697920041440694475	FALSE	94	18	296	12	3	5609	1579407618937916928	ar	['باريس']	['Place']	[]	[]	['https://twitter.com/BkhwshF/status/1697920041440694475/video/1']	[]	[]	[]	[]	[]	[]	TRUE	[]	2023-09-02 10:30:58	TRUE	أفارقة يقتحمون سفارة المووووغرررريب و السفير يفر منها هههههه . أبناء عابري السبيل المووووغريببين شوفو واش راه صاري في سفارتكم في باريس https://t.co/px5usAmrMw	everyone	1	2022-10-10 09:45:15	لا أحب الخونة مهما كانوا و أينما كانوا	[]	[]	[]		FALSE	2176	2503	2844	2	11351	FALSE	4	أفارقة يقتحمون سفارة المووووغرررريب و السفير يفر منها هههههه . أبناء عابري السبيل المووووغريببين شوفو واش راه صاري في سفارتكم في باريس	135	{}	{}	0	1	[]	0
1698045070379733235	FALSE	127	49	492	15	17	64130	1364910751203401984	ar	[]	[]	[]	[]	['https://twitter.com/i/web/status/1698045070379733235', 'https://twitter.com/idleb_online/status/1698045070379733235/video/1']	[]	[]	[]	[]	[]	[]	TRUE	[]	2023-09-02 18:47:47	TRUE	🚨 || 🎥 || هذا الغيض ماهو إلا القليل القليل من الفيض الذي سيواجهم إذا ما حولتكم أو تجرأتم على كسر خطوط الدفاع أو تغيير في خارطة السيطرة على أحد محاور ريف حلب وادلب، وإنما صبراً صبرا على ماينتظركم من نار ستحرق من يبقى منكم. _ راجمات الصواريخ وأفواج المدفعية مستمرة في دك مواقع… https://t.co/DzwaMlSFkU https://t.co/A6NpSEjGy4	everyone	1	2021-02-25 12:12:13	حساب إخباري غير رسمي هدفه الوصول الى الخبر بعد تأكيده ومواكبة التطورات السورية وسير الأحداث في محافظة #إدلب وعمليات جيشنا الباسل في المنطقة.	[]	['إدلب']	[]	Syria Idlib	FALSE	15577	307	11006	59	19358	FALSE	5	هذا الغيض ماهو إلا القليل القليل من الفيض الذي سيواجهم إذا ما حولتكم أو تجرأتم على كسر خطوط الدفاع أو تغيير في خارطة السيطرة على أحد محاور ريف حلب وادلب، وإنما صبراً صبرا على ماينتظركم من نار ستحرق من يبقى منكم. راجمات الصواريخ وأفواج المدفعية مستمرة في دك مواقع	271	{'🎥': 'movie camera', '🚨': 'police car light'}	{'🎥': 1, '🚨': 1}	2	0	[]	0
1692949739086442664	FALSE	90	0	90	2	1	2884	1364910751203401984	ar	[]	[]	['تركيا']	[]	['https://twitter.com/idleb_online/status/1692949739086442664/photo/1', 'https://twitter.com/idleb_online/status/1692949739086442664/photo/1']	[]	[]	[]	[]	[]	[]	TRUE	[]	2023-08-19 17:20:45	TRUE	الإجـ.ـرام العثماني والحقـ.ـد ضد العرب والسوريين.. في #تركيا تم إطلاق موقع اسمه "السوريون" يعطي الموقع جوائز لمن يقـ.ـتل سورياً أو يقـ.ـطع يـ.ـده أو رأسـ.ـه أو يقـ.ـتل طفلاً الدفع بواسطة البيتكوين لا يمكن مراقبته جزء بسيط من تعليقات بعض الأتراك https://t.co/fT3dQ6fFU8	everyone	1	2021-02-25 12:12:13	حساب إخباري غير رسمي هدفه الوصول الى الخبر بعد تأكيده ومواكبة التطورات السورية وسير الأحداث في محافظة #إدلب وعمليات جيشنا الباسل في المنطقة.	[]	['إدلب']	[]	Syria Idlib	FALSE	15577	307	11006	59	19358	FALSE	54	الإجـ.ـرام العثماني والحقـ.ـد ضد العرب والسوريين.. في تركيا تم إطلاق موقع اسمه السوريون يعطي الموقع جوائز لمن يقـ.ـتل سورياً أو يقـ.ـطع يـ.ـده أو رأسـ.ـه أو يقـ.ـتل طفلاً الدفع بواسطة البيتكوين لا يمكن مراقبته جزء بسيط من تعليقات بعض الأتراك	244	{}	{}	0	0	[]	0
1647886653409591296	FALSE	11	3	34	1	0	2382	1364910751203401984	ar	[]	[]	['حلب']	[]	['https://twitter.com/idleb_online/status/1647886653409591296/video/1']	[]	[]	[]	[]	[]	[]	TRUE	[]	2023-04-17 08:56:09	FALSE	أجرى التحالف المحتل فجر اليوم عملية إنزال فا.شلة في قرية "السويدية" ريف جرابلس شمال #حلب. - حيث انطلقت العملية من قاعدة "خراب عشك" اللا.شر.عية في عين العرب. - نتج عنها اصابة مروحية تابعة للتحالف واصابات بين عناصر الانزال ،فيما تحدثت أنباء عن مقتل احد العناصر. 1_2 https://t.co/FoMgReTRmc	everyone	1	2021-02-25 12:12:13	حساب إخباري غير رسمي هدفه الوصول الى الخبر بعد تأكيده ومواكبة التطورات السورية وسير الأحداث في محافظة #إدلب وعمليات جيشنا الباسل في المنطقة.	[]	['إدلب']	[]	Syria Idlib	FALSE	15577	307	11006	59	19358	FALSE	364	أجرى التحالف المحتل فجر اليوم عملية إنزال فا.شلة في قرية السويدية ريف جرابلس شمال حلب. حيث انطلقت العملية من قاعدة خراب عشك اللا.شر.عية في عين العرب. نتج عنها اصابة مروحية تابعة للتحالف واصابات بين عناصر الانزال ،فيما تحدثت أنباء عن مقتل احد العناصر. 1 2	257	{}	{}	0	0	[]	0
1585202129463312388	FALSE	17	11	52	7	1	0	1364910751203401984	ar	[]	[]	['رئيس_الوزراء_البريطاني']	[]	['https://twitter.com/idleb_online/status/1585202129463312388/video/1']	[]	[]	[]	[]	[]	[]	TRUE	[]	2022-10-26 09:30:13	TRUE	🎥 || #رئيس_الوزراء_البريطاني الجديد يقوم برمي اشياء غريبة ( تعويذات ) امام مكتبه لغرض نجاح مهمة الحكومة في اول يوم لتسلمه المنصب. 🥴 https://t.co/Z10pD78ony	everyone	1	2021-02-25 12:12:13	حساب إخباري غير رسمي هدفه الوصول الى الخبر بعد تأكيده ومواكبة التطورات السورية وسير الأحداث في محافظة #إدلب وعمليات جيشنا الباسل في المنطقة.	[]	['إدلب']	[]	Syria Idlib	FALSE	15577	307	11006	59	19358	FALSE	692	رئيس الوزراء البريطاني الجديد يقوم برمي اشياء غريبة تعويذات امام مكتبه لغرض نجاح مهمة الحكومة في اول يوم لتسلمه المنصب.	125	{'🎥': 'movie camera', '🥴': 'woozy face'}	{'🎥': 1, '🥴': 1}	2	0	[]	0
1568946372803534849	FALSE	6	1	18	0	0	0	1364910751203401984	ar	[]	[]	['الملك_تشارلز_الثالث']	[]	['https://twitter.com/idleb_online/status/1568946372803534849/video/1']	[]	[]	['Person', 'Politician', 'Unified Twitter Taxonomy', 'Unified Twitter Taxonomy', 'Unified Twitter Taxonomy']	['Named people in the world like Nelson Mandela', 'Politicians in the world, like Joe Biden', 'A taxonomy of user interests. ', 'A taxonomy of user interests. ', 'A taxonomy of user interests. ']	['Elizabeth II', 'Elizabeth II', 'Elizabeth II', 'Politics', 'Political figures']	['Queen of the United Kingdom and the other Commonwealth realms', 'Queen of the United Kingdom and the other Commonwealth realms', 'Queen of the United Kingdom and the other Commonwealth realms', 'Politics', 'Politician']	TRUE	[]	2022-09-11 12:55:39	TRUE	شاااهد || 🎥 مترجم "قناة العربية" يخطأ في ترجمة كلمة #الملك_تشارلز_الثالث "أنا في غاية السعادة بوفاة أمي الحبيبة الملكة إليزابيث" 😑 https://t.co/hoc4b6JXod	everyone	0	2021-02-25 12:12:13	حساب إخباري غير رسمي هدفه الوصول الى الخبر بعد تأكيده ومواكبة التطورات السورية وسير الأحداث في محافظة #إدلب وعمليات جيشنا الباسل في المنطقة.	[]	['إدلب']	[]	Syria Idlib	FALSE	15577	307	11006	59	19358	FALSE	834	شاااهد مترجم قناة العربية يخطأ في ترجمة كلمة الملك تشارلز الثالث أنا في غاية السعادة بوفاة أمي الحبيبة الملكة إليزابيث	124	{'😑': 'expressionless face', '🎥': 'movie camera'}	{'😑': 1, '🎥': 1}	2	0	[]	0
1697716676245029049	FALSE	145	137	1622	11	10	133332	4926672947	ar	[]	[]	['فك_اللجام', 'ناس_الشجرة_بسلمو_عليكم']	[]	['https://twitter.com/yasin123ah/status/1697716676245029049/photo/1']	[]	[]	['Business Taxonomy']	['Categories within Brand Verticals that narrow down the scope of Brands']	['Gaming Business']	['Brands, companies, advertisers and every non-person handle with the profit intent related to offline and online games such as gaming consoles, tabletop games, video game publishers']	TRUE	[]	2023-09-01 21:02:52	TRUE	وصلنا مرحلة الارتكازات والحمد لله ، الجيش يضع ارتكازات في بحري✌✌️ ،، وشكرانيين ،، #فك_اللجام #ناس_الشجرة_بسلمو_عليكم https://t.co/PHPdOpdA5v	everyone	1	2016-02-18 05:49:07	‏‏‏‏‏‏,,‏‏‏‏Un militant des droits de l'humains سنظل نحفر في الجدار اما فتحنا ثغرة للنور او متنا علي وجة الجدار ،، مدون في تويتر 🇸🇩	[]	['إدلب']	[]	Paris, France	FALSE	266811	51	46905	21	355703	FALSE	6	وصلنا مرحلة الارتكازات والحمد لله ، الجيش يضع ارتكازات في بحري ،، وشكرانيين ،، فك اللجام ناس الشجرة بسلمو عليكم	113	{'✌': 'victory hand', '✌️': 'victory hand'}	{'✌': 2, '✌️': 1}	3	0	[]	0
1510222599741181958	FALSE	13	18	70	1	1	0	4926672947	ar	['عبد الفتاح', 'السودان', 'البشير', 'البشير']	['Person', 'Place', 'Person', 'Person']	['هبباي6أبريل', 'لاتفاوض_لاشراكة_لاشرعية']	[]	['https://twitter.com/yasin123ah/status/1510222599741181958/video/1']	[]	[]	['Events [Entity Service]']	['Real world events. ']	['Ousted president Omar al-Bashir will be referred for trial soon']	["Omar al-Bashir, Sudan's ousted president, will be referred for trial after a period for objections expires, chief prosecutor has said on Saturday. Photo via @AJEnglish"]	TRUE	[]	2022-04-02 11:48:21	TRUE	بالفيديو .. عبد الفتاح البرهان يُهدِّد رئيس يونيتامس، فولكر بيترس بالطرد من السودان .. ذهب المخلوع البشير وجاءنا بشير اهطل من المخلوع البشير . المهم دا شعر ماعندك لية رقبة يا البرهان والايام بيننا ،، #هبباي6أبريل #لاتفاوض_لاشراكة_لاشرعية https://t.co/gpt53B7YNP	everyone	0	2016-02-18 05:49:07	‏‏‏‏‏‏,,‏‏‏‏Un militant des droits de l'humains سنظل نحفر في الجدار اما فتحنا ثغرة للنور او متنا علي وجة الجدار ،، مدون في تويتر 🇸🇩	[]	['إدلب']	[]	Paris, France	FALSE	266811	51	46905	21	355703	FALSE	358	بالفيديو .. عبد الفتاح البرهان يُهدِّد رئيس يونيتامس، فولكر بيترس بالطرد من السودان .. ذهب المخلوع البشير وجاءنا بشير اهطل من المخلوع البشير . المهم دا شعر ماعندك لية رقبة يا البرهان والايام بيننا ،، هبباي6أبريل لاتفاوض لاشراكة لاشرعية	237	{}	{}	0	4	[]	0
1697668748658835901	FALSE	45	34	106	4	2	6455	2721977918	ar	[]	[]	['قيس_سعيد', 'تونس']	[]	['https://twitter.com/Tarek_Alkhelifi/status/1697668748658835901/photo/1']	[]	[]	['Person', 'Place', 'Politician', 'Unified Twitter Taxonomy', 'Unified Twitter Taxonomy', 'Unified Twitter Taxonomy']	['Named people in the world like Nelson Mandela', 'Named places in the world, like Fenway Park', 'Politicians in the world, like Joe Biden', 'A taxonomy of user interests. ', 'A taxonomy of user interests. ', 'A taxonomy of user interests. ']	['Kais Saied', 'Tunisia (تونس)', 'Kais Saied', 'Politics', 'Political figures', 'Kais Saied']	['', '', '', 'Politics', 'Politician', '']	TRUE	[]	2023-09-01 17:52:25	TRUE	موقع ميدل إيست مونيتور : #قيس_سعيد قام بتحويل ملايين الدولارات من المساعدات الخارجية إلى حساباته البنكية بالخارج ! #تونس https://t.co/LT8jVUFy8M	everyone	1	2014-08-10 16:25:53	IT Infrastructure Engineer ⭐️⭐️ 🇹🇳 ⭐️⭐️ هذا الحساب لا يرحب بالفلول و الأزلام و الذيول و الاتباع و الجهلة و الجبناء و الجراد و الذباب	[]	['إدلب']	[]	Paris, France	FALSE	10767	6990	34311	6	43613	FALSE	7	موقع ميدل إيست مونيتور : قيس سعيد قام بتحويل ملايين الدولارات من المساعدات الخارجية إلى حساباته البنكية بالخارج تونس	118	{}	{}	0	0	[]	0
1586389006215806976	FALSE	0	0	7	0	0	0	2721977918	ar	['ترامب', 'تويتر']	['Person', 'Product']	[]	[]	['https://twitter.com/Tarek_Alkhelifi/status/1586389006215806976/photo/1']	[]	[]	['Business Taxonomy', 'Business Taxonomy', 'Person', 'Entities [Entity Service]', 'Brand', 'Interests and Hobbies Vertical', 'Interests and Hobbies Category', 'Unified Twitter Taxonomy', 'Unified Twitter Taxonomy', 'Unified Twitter Taxonomy']	['Categories within Brand Verticals that narrow down the scope of Brands', 'Categories within Brand Verticals that narrow down the scope of Brands', 'Named people in the world like Nelson Mandela', 'Entity Service top level domain, every item that is in Entity Service should be in this domain', 'Brands and Companies', 'Top level interests and hobbies groupings, like Food or Travel', 'A grouping o…	['Financial Services Business', 'Technology Business', 'Elon Musk', 'Services', 'X', 'Business & finance', 'Leadership', 'Elon Musk', 'Tech personalities', 'Business personalities']	['Brands, companies, advertisers and every non-person handle with the profit intent related to Banks, Credit cards, Insurance, Investments, Stocks ', 'Brands, companies, advertisers and every non-person handle with the profit intent related to softwares, apps, communication equipments, hardwares', 'Elon Musk', '', '', '', 'Leadership', 'Elon Musk', 'Tech Professionals', '']	TRUE	[]	2022-10-29 16:06:27	TRUE	إيلون ماسك لموظفة أوقفت حساب ترامب على تويتر: أنتي مطرودة!. https://t.co/LkhAM3hws8	everyone	1	2014-08-10 16:25:53	IT Infrastructure Engineer ⭐️⭐️ 🇹🇳 ⭐️⭐️ هذا الحساب لا يرحب بالفلول و الأزلام و الذيول و الاتباع و الجهلة و الجبناء و الجراد و الذباب	[]	['إدلب']	[]	Paris, France	FALSE	10767	6990	34311	6	43613	FALSE	690	إيلون ماسك لموظفة أوقفت حساب ترامب على تويتر: أنتي مطرودة.	59	{}	{}	0	2	[]	0
1579047226323927041	FALSE	3	0	10	0	0	0	2721977918	ar	['السعودية']	['Place']	[]	[]	['https://twitter.com/Tarek_Alkhelifi/status/1579047226323927041/video/1']	[]	[]	[]	[]	[]	[]	TRUE	[]	2022-10-09 09:52:50	TRUE	دعاية أمريكية فيها تعمد باتهام السعودية بارتفاع أسعار الوقود والإرهاب . . رمتني بدائها وانسلّت ... https://t.co/lP17xfXF84	everyone	1	2014-08-10 16:25:53	IT Infrastructure Engineer ⭐️⭐️ 🇹🇳 ⭐️⭐️ هذا الحساب لا يرحب بالفلول و الأزلام و الذيول و الاتباع و الجهلة و الجبناء و الجراد و الذباب	[]	['إدلب']	[]	Paris, France	FALSE	10767	6990	34311	6	43613	FALSE	733	دعاية أمريكية فيها تعمد باتهام السعودية بارتفاع أسعار الوقود والإرهاب . . رمتني بدائها وانسلّت ...	99	{}	{}	0	1	[]	0
1577612840483045380	FALSE	1	1	14	0	0	0	2721977918	ar	[]	[]	[]	[]	['https://twitter.com/Tarek_Alkhelifi/status/1577612840483045380/photo/1']	[]	[]	[]	[]	[]	[]	TRUE	[]	2022-10-05 10:53:06	FALSE	الأعمدة المتوهجة تعود مرة اخرى ... و تتردد في وسائل التواصل على أنها أشعة ليزر روسية لإعماء الأقمار الصناعية.. و في الحقيقة عندما يكون الجو باردًا تظل بلورات الجليد معلقة في الهواء. وهذا ما يسمى غبار الجليد ، تعكس هذه البلورات الإضاءة الاصطناعية وبفضل التأثير البصري ، https://t.co/irGHJNE2FB	everyone	1	2014-08-10 16:25:53	IT Infrastructure Engineer ⭐️⭐️ 🇹🇳 ⭐️⭐️ هذا الحساب لا يرحب بالفلول و الأزلام و الذيول و الاتباع و الجهلة و الجبناء و الجراد و الذباب	[]	['إدلب']	[]	Paris, France	FALSE	10767	6990	34311	6	43613	FALSE	746	الأعمدة المتوهجة تعود مرة اخرى ... و تتردد في وسائل التواصل على أنها أشعة ليزر روسية لإعماء الأقمار الصناعية.. و في الحقيقة عندما يكون الجو باردًا تظل بلورات الجليد معلقة في الهواء. وهذا ما يسمى غبار الجليد ، تعكس هذه البلورات الإضاءة الاصطناعية وبفضل التأثير البصري ،	271	{}	{}	0	0	[]	0
1697880971721265630	FALSE	8	1	186	1	0	6644	1432300055290126080	ar	[]	[]	['الصين']	[]	['https://twitter.com/radioalginter/status/1697880971721265630/video/1']	[]	[]	[]	[]	[]	[]	TRUE	[]	2023-09-02 07:55:43	TRUE	🔴🎥الأقوى منذ عقود...إعصار "ساولا" يضرب مناطق في جنوب #الصين🇨🇳. https://t.co/J9HCHSv6Ce	everyone	1	2021-08-30 11:12:34	الحساب الرسمي لإذاعة الجزائر الدولية The official account of Radio Algeria International	[]	[]	[]	Algiers الجزائر	FALSE	265826	42	45661	174	193	TRUE	9	الأقوى منذ عقود...إعصار ساولا يضرب مناطق في جنوب الصين.	56	{'🇨🇳': 'flag: China', '🎥': 'movie camera', '🔴': 'red circle'}	{'🇨🇳': 1, '🎥': 1, '🔴': 1}	3	0	[]	0
1580968020566212611	FALSE	8	1	148	0	0	0	1432300055290126080	ar	['إبراهيم تراوري']	['Person']	['بوركينا_فاسو']	[]	['https://twitter.com/radioalginter/status/1580968020566212611/photo/1']	[]	[]	[]	[]	[]	[]	TRUE	[]	2022-10-14 17:05:23	TRUE	⚡⚡تسمية النقيب إبراهيم تراوري رئيسا انتقاليا في #بوركينا_فاسو🇧🇫. https://t.co/x1RfJmjGaT	everyone	0	2021-08-30 11:12:34	الحساب الرسمي لإذاعة الجزائر الدولية The official account of Radio Algeria International	[]	[]	[]	Algiers الجزائر	FALSE	265826	42	45661	174	193	TRUE	89	تسمية النقيب إبراهيم تراوري رئيسا انتقاليا في بوركينا فاسو.	60	{'⚡': 'high voltage', '🇧🇫': 'flag: Burkina Faso'}	{'⚡': 2, '🇧🇫': 1}	3	1	[]	0
1683408220868444161	FALSE	67	82	780	33	3	37344	1432300055290126080	ar	[]	[]	['الجزائر', 'جيجل']	[]	['https://twitter.com/radioalginter/status/1683408220868444161/video/1']	[]	[]	[]	[]	[]	[]	TRUE	[]	2023-07-24 09:26:10	TRUE	🔴🎥 #الجزائر🇩🇿.. النيران تلتهم مساحات هامة من الغابات بزيامة منصورية، و مصالح الحماية المدنية لولاية #جيجل تعمل على إطفائها. https://t.co/51c9a3DFET	everyone	0	2021-08-30 11:12:34	الحساب الرسمي لإذاعة الجزائر الدولية The official account of Radio Algeria International	[]	[]	[]	Algiers الجزائر	FALSE	265826	42	45661	174	193	TRUE	111	الجزائر.. النيران تلتهم مساحات هامة من الغابات بزيامة منصورية، و مصالح الحماية المدنية لولاية جيجل تعمل على إطفائها.	118	{'🎥': 'movie camera', '🇩🇿': 'flag: Algeria', '🔴': 'red circle'}	{'🎥': 1, '🇩🇿': 1, '🔴': 1}	3	0	[]	0
1461834696887877635	FALSE	66	17	450	6	1	0	1432300055290126080	ar	['وزارة التعليم']	['Organization']	['المغرب']	[]	['https://twitter.com/radioalginter/status/1461834696887877635/video/1']	[]	[]	[]	[]	[]	[]	TRUE	[]	2021-11-19 23:12:05	TRUE	🔴🎥 #المغرب..طلبة فاس يخرجون في مسيرة احتجاجية ضد شروط وزارة التعليم في مسابقة الأساتذة من ضمنها الانتقاء الأولي و تحديد السن بثلاثين عاما. https://t.co/s0Z3GiJjmr	everyone	0	2021-08-30 11:12:34	الحساب الرسمي لإذاعة الجزائر الدولية The official account of Radio Algeria International	[]	[]	[]	Algiers الجزائر	FALSE	265826	42	45661	174	193	TRUE	394	المغرب..طلبة فاس يخرجون في مسيرة احتجاجية ضد شروط وزارة التعليم في مسابقة الأساتذة من ضمنها الانتقاء الأولي و تحديد السن بثلاثين عاما.	136	{'🎥': 'movie camera', '🔴': 'red circle'}	{'🎥': 1, '🔴': 1}	2	1	['وزارة التعليم']	1
1500400852791697414	FALSE	0	0	45	0	0	0	1432300055290126080	ar	['بيشاور']	['Place']	['باكستان']	[]	['https://twitter.com/radioalginter/status/1500400852791697414/photo/1']	[]	[]	[]	[]	[]	[]	TRUE	[]	2022-03-06 09:20:14	TRUE	🔴#باكستان🇵🇰.. ارتفاع حصيلة ضحايا التفجير الذي وقع أول أمس الجمعة داخل مسجد في مدينة بيشاور شمال غربي البلاد إلى 63 قتيلا. https://t.co/AiJOq0p3aN	everyone	0	2021-08-30 11:12:34	الحساب الرسمي لإذاعة الجزائر الدولية The official account of Radio Algeria International	[]	[]	[]	Algiers الجزائر	FALSE	265826	42	45661	174	193	TRUE	524	باكستان.. ارتفاع حصيلة ضحايا التفجير الذي وقع أول أمس الجمعة داخل مسجد في مدينة بيشاور شمال غربي البلاد إلى 63 قتيلا.	118	{'🇵🇰': 'flag: Pakistan', '🔴': 'red circle'}	{'🇵🇰': 1, '🔴': 1}	2	1	[]	0
1696104279038152883	FALSE	24	175	150	20	18	136361	854193271	ar	['جدة', 'جدة', 'الاتحاد']	['Place', 'Place', 'Organization']	['محمد_صلاح', 'الاتحاد', 'سحبة_صلاح_على_الاتحاد', 'الاتحاد_نادي_سعودي_ياصندوق', 'الرياض_الان']	[]	['https://twitter.com/gwe962/status/1696104279038152883/video/1']	[]	[]	['Sports Event', 'Sports Team', 'Events [Entity Service]', 'Soccer Match', 'Business Taxonomy', 'Unified Twitter Taxonomy', 'Unified Twitter Taxonomy', 'Unified Twitter Taxonomy', 'Person', 'Athlete', 'Unified Twitter Taxonomy', 'Unified Twitter Taxonomy', 'Unified Twitter Taxonomy', 'Sports Event', 'Events [Entity Service]', 'Soccer Match']	['', 'A sports team organization, like Arsenal and the Boston Celtics', 'Real world events. ', 'Sports Event specific to Soccer matches', 'Categories within Brand Verticals that narrow down the scope of Brands', 'A taxonomy of user interests. ', 'A taxonomy of user interests. ', 'A taxonomy of user interests. ', 'Named people in the world like Nelson Mandela', 'An athlete in the world, like Seren…	['Al-Ettifaq vs Al-Ittihad', 'Al Ittihad Club', 'Al-Ettifaq vs Al-Ittihad', 'Al-Ettifaq vs Al-Ittihad', 'Sports & Fitness Business', 'Al Ittihad Club', 'Soccer', 'Sports', 'Mohamed Salah', 'Mohamed Salah', 'Soccer', 'Mohamed Salah', 'Sports', 'Al-Ettifaq vs Al-Ittihad', 'Al-Ettifaq vs Al-Ittihad', 'Al-Ettifaq vs Al-Ittihad']	['Al-Ettifaq vs Al-Ittihad match! Explore the latest news, must-see highlights and the can’t-miss moments right here. \n\nPhoto via @Ettifaq\n', '', 'Al-Ettifaq vs Al-Ittihad match! Explore the latest news, must-see highlights and the can’t-miss moments right here. \n\nPhoto via @Ettifaq\n', 'Al-Ettifaq vs Al-Ittihad match! Explore the latest news, must-see highlights and the can’t-miss moments r…	TRUE	[]	2023-08-28 10:15:46	TRUE	🚨🚨🚨 🚨عااااجل وحصري من موظف استقبال مطار جدة وصول #محمد_صلاح الى جدة للتعاقد مع نادي #الاتحاد الف مبروك لجماهير نادي الاتحاد 🤍💛 #سحبة_صلاح_على_الاتحاد #الاتحاد_نادي_سعودي_ياصندوق #الرياض_الان https://t.co/XGnkZ2FzVG	everyone	1	2012-09-30 05:50:02	I do not belong to this era	[]	[]	[]	المُشتري	FALSE	3151	28	2101	5	2229	FALSE	10	عااااجل وحصري من موظف استقبال مطار جدة وصول محمد صلاح الى جدة للتعاقد مع نادي الاتحاد الف مبروك لجماهير نادي الاتحاد سحبة صلاح على الاتحاد الاتحاد نادي سعودي ياصندوق الرياض الان	185	{'💛': 'yellow heart', '🚨': 'police car light', '🤍': 'white heart'}	{'💛': 1, '🚨': 4, '🤍': 1}	6	3	['الاتحاد']	1
1697715448882618450	FALSE	43	35	489	5	4	24115	1207795951051653120	ar	[]	[]	[]	[]	['https://twitter.com/aliraqplus/status/1697715448882618450/video/1']	[]	[]	[]	[]	[]	[]	TRUE	[]	2023-09-01 20:57:59	TRUE	🔴 عاجل التحالف الدولي يقصف مواقع الحرس الثوري الإيراني و المليشيات العراقية في مدينة البوكمال الآن. https://t.co/wPt1Sho25V	everyone	1	2019-12-19 22:53:02	وكالة العراق برس وكالة اعلامية عراقية تقوم على شعار الواقع كما هو ونلتزم به، لنقل الحقائق والخبر والرأي | متواجدون على تليكرام https://t.co/jzPPrLld1r	['https://t.me/aliraqpress']	[]	[]	Iraq	FALSE	27639	1951	8575	39	68253	FALSE	12	عاجل التحالف الدولي يقصف مواقع الحرس الثوري الإيراني و المليشيات العراقية في مدينة البوكمال الآن.	99	{'🔴': 'red circle'}	{'🔴': 1}	1	0	[]	0
1687096670927081472	FALSE	24	20	191	4	5	23081	1207795951051653120	ar	[]	[]	[]	[]	['https://twitter.com/iraq_press_iq/status/1687096670927081472/video/1']	[]	[]	[]	[]	[]	[]	TRUE	[]	2023-08-03 13:42:45	TRUE	أهالي البصرة يهتفون يوم أمس صدام اطلع صارت هيتة. https://t.co/ZJld2Hk6rC	everyone	1	2019-12-19 22:53:02	وكالة العراق برس وكالة اعلامية عراقية تقوم على شعار الواقع كما هو ونلتزم به، لنقل الحقائق والخبر والرأي | متواجدون على تليكرام https://t.co/jzPPrLld1r	['https://t.me/aliraqpress']	[]	[]	Iraq	FALSE	27639	1951	8575	39	68253	FALSE	82	أهالي البصرة يهتفون يوم أمس صدام اطلع صارت هيتة.	50	{}	{}	0	0	[]	0
1662756229267988481	FALSE	8	3	47	0	0	5025	1207795951051653120	ar	['إيران']	['Place']	[]	[]	['https://twitter.com/iraq_press_iq/status/1662756229267988481/video/1']	[]	[]	['Sports Event', 'Events [Entity Service]', 'Cricket Match']	['', 'Real world events. ', 'Sports Event specific to Cricket matches']	['Chennai Super Kings vs Lucknow Super Giants', 'Chennai Super Kings vs Lucknow Super Giants', 'Chennai Super Kings vs Lucknow Super Giants']	['', '', '']	TRUE	[]	2023-05-28 09:42:32	TRUE	⛔ "خبر عاجل" طالبان تدمير مجموعه 18 منشأة حدودية إيرانية كان الحرس الثوري قد نفذ هجمات إرهابية من هذه البؤر الاستيطانية الضخمة، إيران لم تقم بمقاومة قوية حتى الآن، يبدو جيشهم لينًا وأنثويًا. https://t.co/q9syB40YHw	everyone	1	2019-12-19 22:53:02	وكالة العراق برس وكالة اعلامية عراقية تقوم على شعار الواقع كما هو ونلتزم به، لنقل الحقائق والخبر والرأي | متواجدون على تليكرام https://t.co/jzPPrLld1r	['https://t.me/aliraqpress']	[]	[]	Iraq	FALSE	27639	1951	8575	39	68253	FALSE	269	خبر عاجل طالبان تدمير مجموعه 18 منشأة حدودية إيرانية كان الحرس الثوري قد نفذ هجمات إرهابية من هذه البؤر الاستيطانية الضخمة، إيران لم تقم بمقاومة قوية حتى الآن، يبدو جيشهم لينًا وأنثويًا.	188	{'⛔': 'no entry'}	{'⛔': 1}	1	1	[]	0
1659535056581345281	FALSE	2	0	11	0	0	1211	1207795951051653120	ar	['جدة', 'روسيا', 'سوريا']	['Place', 'Place', 'Place']	[]	[]	['https://twitter.com/iraq_press_iq/status/1659535056581345281/photo/1']	[]	[]	['Person', 'Politician', 'Unified Twitter Taxonomy', 'Unified Twitter Taxonomy', 'Unified Twitter Taxonomy']	['Named people in the world like Nelson Mandela', 'Politicians in the world, like Joe Biden', 'A taxonomy of user interests. ', 'A taxonomy of user interests. ', 'A taxonomy of user interests. ']	['Bashar al-Assad', 'Bashar al-Assad', 'Politics', 'Political figures', 'Bashar al-Assad']	['Syrian President Bashar al-Assad', 'Syrian President Bashar al-Assad', 'Politics', 'Politician', 'Syrian President Bashar al-Assad']	TRUE	[]	2023-05-19 12:22:44	TRUE	قمة جدة زيلينسكي في القمة العربي بدء بذكر عدد من جرائم روسيا في سوريا، مما دفع بشار الاسد لنزع سماعة الترجمة اثناء الخطاب. https://t.co/tUkdIZ2pcq	everyone	1	2019-12-19 22:53:02	وكالة العراق برس وكالة اعلامية عراقية تقوم على شعار الواقع كما هو ونلتزم به، لنقل الحقائق والخبر والرأي | متواجدون على تليكرام https://t.co/jzPPrLld1r	['https://t.me/aliraqpress']	[]	[]	Iraq	FALSE	27639	1951	8575	39	68253	FALSE	289	قمة جدة زيلينسكي في القمة العربي بدء بذكر عدد من جرائم روسيا في سوريا، مما دفع بشار الاسد لنزع سماعة الترجمة اثناء الخطاب.	124	{}	{}	0	3	[]	0
1697564098081280462	FALSE	7	6	140	1	3	7129	1509977617776233984	ar	[]	[]	[]	[]	['https://twitter.com/ralshhwan9/status/1697564098081280462/video/1']	[]	[]	[]	[]	[]	[]	TRUE	[]	2023-09-01 10:56:34	TRUE	الله أكبر الله أكبر الله أكبر حي على الجهاد حي على الجهاد هذه مساجد دير الزور تصدح فهل من ملبي https://t.co/WH6K7Ezydd	everyone	1	2022-04-01 19:35:22	#إعلامي_سوري مانشره هنا يعبر عن آرائي وتصوراتي الشخصية فقط .. اخلع نعليك فأنت في محراب الأحرار @AlshhwanRd32252	[]	['إعلامي_سوري']	[]	الشمال المحرر	FALSE	4335	460	11479	11	5179	FALSE	13	الله أكبر الله أكبر الله أكبر حي على الجهاد حي على الجهاد هذه مساجد دير الزور تصدح فهل من ملبي	97	{}	{}	0	0	[]	0
1694656664350118154	FALSE	4	2	34	0	0	942	1509977617776233984	ar	[]	[]	['عـاجل', 'السويداء']	[]	[]	[]	[]	[]	[]	[]	[]	TRUE	[]	2023-08-24 10:23:28	TRUE	#عـاجل #السويداء وردتنا أنباء شبه مؤكدة عن انشقاق ضباط ينحدرون من الطائفة الدرزية عن صفوف عصابات الأسد	everyone	1	2022-04-01 19:35:22	#إعلامي_سوري مانشره هنا يعبر عن آرائي وتصوراتي الشخصية فقط .. اخلع نعليك فأنت في محراب الأحرار @AlshhwanRd32252	[]	['إعلامي_سوري']	[]	الشمال المحرر	FALSE	4335	460	11479	11	5179	FALSE	16	عـاجل السويداء وردتنا أنباء شبه مؤكدة عن انشقاق ضباط ينحدرون من الطائفة الدرزية عن صفوف عصابات الأسد	102	{}	{}	0	0	[]	0
1655016955277877250	FALSE	0	0	4	0	0	297	1509977617776233984	ar	[]	[]	[]	[]	['https://twitter.com/ralshhwan9/status/1655016955277877250/video/1']	[]	[]	[]	[]	[]	[]	TRUE	[]	2023-05-07 01:09:25	TRUE	القرداحة الان https://t.co/iOZKA3Xy7S	everyone	1	2022-04-01 19:35:22	#إعلامي_سوري مانشره هنا يعبر عن آرائي وتصوراتي الشخصية فقط .. اخلع نعليك فأنت في محراب الأحرار @AlshhwanRd32252	[]	['إعلامي_سوري']	[]	الشمال المحرر	FALSE	4335	460	11479	11	5179	FALSE	307	القرداحة الان	14	{}	{}	0	0	[]	0
1595325572888002560	FALSE	0	0	0	0	0	0	1509977617776233984	ar	[]	[]	['قطر']	[]	['https://twitter.com/ralshhwan9/status/1595325572888002560/photo/1']	[]	[]	[]	[]	[]	[]	TRUE	[]	2022-11-23 07:57:10	TRUE	#قطر : ترحيل وتغريم مشجعة إنجليزية إلى بلدها مباشرة بعد أن قامت بنزع قميصها بمنطقة الجمهور بعد نهاية المباراة ... ! https://t.co/XXlvDuPOJJ	everyone	1	2022-04-01 19:35:22	#إعلامي_سوري مانشره هنا يعبر عن آرائي وتصوراتي الشخصية فقط .. اخلع نعليك فأنت في محراب الأحرار @AlshhwanRd32252	[]	['إعلامي_سوري']	[]	الشمال المحرر	FALSE	4335	460	11479	11	5179	FALSE	639	قطر : ترحيل وتغريم مشجعة إنجليزية إلى بلدها مباشرة بعد أن قامت بنزع قميصها بمنطقة الجمهور بعد نهاية المباراة ...	114	{}	{}	0	0	[]	0
1575866726058971137	FALSE	0	0	0	0	0	0	1509977617776233984	ar	[]	[]	['بلغاريا', 'ملاحظة']	[]	['https://twitter.com/ralshhwan9/status/1575866726058971137/video/1']	[]	[]	['Business Taxonomy', 'Entities [Entity Service]', 'Interests and Hobbies']	['Categories within Brand Verticals that narrow down the scope of Brands', 'Entity Service top level domain, every item that is in Entity Service should be in this domain', 'Interests, opinions, and behaviors of individuals, groups, or cultures; like Speciality Cooking or Theme Parks']	['Travel & Transportation Business', 'Travel', 'Travel Actions']	['Brands, companies, advertisers and every non-person handle with the profit intent related to travel as airlines, travel agencies, hotels', 'Travel', 'This entity includes all conversations about travel and vacation.']	TRUE	[]	2022-09-30 15:14:40	TRUE	#بلغاريا وفاة اربع سوريين بصاعقه في بلغاريا أثناء رحلة اللجوء إلى الدول الأوربية #ملاحظة لا علم لنا بصحة الفيديو المجود لنفس الاشخاص او قديم https://t.co/D0TklrZCbI	everyone	1	2022-04-01 19:35:22	#إعلامي_سوري مانشره هنا يعبر عن آرائي وتصوراتي الشخصية فقط .. اخلع نعليك فأنت في محراب الأحرار @AlshhwanRd32252	[]	['إعلامي_سوري']	[]	الشمال المحرر	FALSE	4335	460	11479	11	5179	FALSE	756	بلغاريا وفاة اربع سوريين بصاعقه في بلغاريا أثناء رحلة اللجوء إلى الدول الأوربية ملاحظة لا علم لنا بصحة الفيديو المجود لنفس الاشخاص او قديم	141	{}	{}	0	0	[]	0
1569383452532785152	FALSE	0	0	0	0	0	0	1509977617776233984	ar	['امريكا', 'أيمن الظواهري', 'أمريكا']	['Place', 'Person', 'Place']	[]	[]	['https://twitter.com/ralshhwan9/status/1569383452532785152/photo/1']	[]	[]	['Person', 'Unified Twitter Taxonomy']	['Named people in the world like Nelson Mandela', 'A taxonomy of user interests. ']	['Ayman al-Zawahri', 'Ayman al-Zawahri']	['', '']	TRUE	[]	2022-09-12 17:52:27	TRUE	بعد إعلان امريكا إغتياله ،، أيمن الظواهري يظهر في إصدار مرئي لتنظيم القاعدة اليوم بعنوان " دعوة الإمام إلى الامة الإسلامية". القاعدة 1: 0 أمريكا الحمدلله ع السلامة يا شيخ 🤔🤔 https://t.co/f3lJgzYjAW	everyone	1	2022-04-01 19:35:22	#إعلامي_سوري مانشره هنا يعبر عن آرائي وتصوراتي الشخصية فقط .. اخلع نعليك فأنت في محراب الأحرار @AlshhwanRd32252	[]	['إعلامي_سوري']	[]	الشمال المحرر	FALSE	4335	460	11479	11	5179	FALSE	821	بعد إعلان امريكا إغتياله ،، أيمن الظواهري يظهر في إصدار مرئي لتنظيم القاعدة اليوم بعنوان دعوة الإمام إلى الامة الإسلامية. القاعدة 1: 0 أمريكا الحمدلله ع السلامة يا شيخ	172	{'🤔': 'thinking face'}	{'🤔': 2}	2	3	[]	0
1696640015206326418	FALSE	1	0	6	0	0	1113	1580992545575866112	ar	['سوريا', 'قبيلة', 'العكيدات', 'عشيرة', 'الشعيطات']	['Place', 'Place', 'Place', 'Place', 'Place']	[]	[]	['https://twitter.com/center1iq/status/1696640015206326418/video/1']	[]	[]	[]	[]	[]	[]	TRUE	[]	2023-08-29 21:44:36	TRUE	❇️خاص - سوريا 📌 أشتباكات عنيفة بين مقاتلين قبيلة العكيدات عشيرة الشعيطات و قوات قسد في دير الزور https://t.co/yVRhmEpSMS	everyone	1	2022-10-14 18:43:22	موقعنا الرسمي	[]	[]	[]		FALSE	294	551	956	0	422	FALSE	14	خاص سوريا أشتباكات عنيفة بين مقاتلين قبيلة العكيدات عشيرة الشعيطات و قوات قسد في دير الزور	95	{'❇️': 'sparkle', '📌': 'pushpin'}	{'❇️': 1, '📌': 1}	2	5	[]	0
1697431624705614124	FALSE	296	157	2666	40	131	1969424	417262550	ar	['والولايات المتحدة']	['Place']	[]	[]	['https://twitter.com/Mrgunsngear/status/1695124348397371611/video/1']	[]	[]	[]	[]	[]	[]	TRUE	[]	2023-09-01 02:10:10	TRUE	العصابات تجتاح مدن هايتي وتسيطر على عدة مدن والولايات المتحدة الاميركية تدعو مواطنيها لمغادرة البلاد ! https://t.co/IQlP18z7fM	everyone	1	2011-11-20 18:40:13	Author/Editor-in-Chief of American and International Affairs/ Dr.SamXPlatform/ Political Activist, Ph.D.Cognitive Psychology/Doctoral Academic Researcher at GCU	[]	[]	[]	USA	FALSE	450870	4484	63914	626	42413	FALSE	15	العصابات تجتاح مدن هايتي وتسيطر على عدة مدن والولايات المتحدة الاميركية تدعو مواطنيها لمغادرة البلاد	103	{}	{}	0	1	[]	0
1695878795398467712	FALSE	3362	327	14237	145	4298	3726684	417262550	ar	['ديانا لينسكا']	['Person']	[]	[]	['https://twitter.com/WeWin12515028/status/1691522901256605697/video/1']	[]	[]	[]	[]	[]	[]	TRUE	[]	2023-08-27 19:19:47	TRUE	يقال انه تم اغتيال البروفيسور ديانا لينسكا بعد فضحت حقيقة مخطط نشر الاوبئة العالم واولهم كوفيد-١٩ https://t.co/dfqNZ4bWVU	everyone	1	2011-11-20 18:40:13	Author/Editor-in-Chief of American and International Affairs/ Dr.SamXPlatform/ Political Activist, Ph.D.Cognitive Psychology/Doctoral Academic Researcher at GCU	[]	[]	[]	USA	FALSE	450870	4484	63914	626	42413	FALSE	23	يقال انه تم اغتيال البروفيسور ديانا لينسكا بعد فضحت حقيقة مخطط نشر الاوبئة العالم واولهم كوفيد١٩	98	{}	{}	0	1	[]	0
1692648609160831427	FALSE	131	969	1542	57	362	1814175	417262550	ar	[]	[]	[]	[]	['https://twitter.com/Charbel70985302/status/1692568521371214221/video/1']	[]	[]	['Business Taxonomy']	['Categories within Brand Verticals that narrow down the scope of Brands']	['Food & Beverage Business']	['Brands, companies, advertisers and every non-person handle with the profit intent and related to foods & beverages such as snacks, soft drinks, beers.']	TRUE	[]	2023-08-18 21:24:10	FALSE	اخراج جثمان البابا بولس يوحنا الثاني بعد وفاته ب ١٣ سنة ،فوجدوا جثمانه سليماً…!! https://t.co/sn7mg0x9Nt	everyone	1	2011-11-20 18:40:13	Author/Editor-in-Chief of American and International Affairs/ Dr.SamXPlatform/ Political Activist, Ph.D.Cognitive Psychology/Doctoral Academic Researcher at GCU	[]	[]	[]	USA	FALSE	450870	4484	63914	626	42413	FALSE	56	اخراج جثمان البابا بولس يوحنا الثاني بعد وفاته ب ١٣ سنة ،فوجدوا جثمانه سليماً	80	{}	{}	0	0	[]	0
1683314951727767552	FALSE	82	268	720	46	15	375938	417262550	ar	[]	[]	[]	[]	['https://twitter.com/drhossamsamy65/status/1683314951727767552/photo/1']	[]	[]	[]	[]	[]	[]	TRUE	[]	2023-07-24 03:15:33	TRUE	اذا صح هذا الخبر، فهو استفزاز صريح بكل المقاييس!!! https://t.co/8tJhaxmGI5	everyone	1	2011-11-20 18:40:13	Author/Editor-in-Chief of American and International Affairs/ Dr.SamXPlatform/ Political Activist, Ph.D.Cognitive Psychology/Doctoral Academic Researcher at GCU	[]	[]	[]	USA	FALSE	450870	4484	63914	626	42413	FALSE	113	اذا صح هذا الخبر، فهو استفزاز صريح بكل المقاييس	48	{}	{}	0	0	[]	0
1681347801895129088	FALSE	99	478	791	57	55	438036	417262550	ar	[]	[]	[]	[]	['https://twitter.com/i/web/status/1681347801895129088', 'https://twitter.com/drhossamsamy65/status/1681347801895129088/photo/1']	[]	[]	[]	[]	[]	[]	TRUE	[]	2023-07-18 16:58:48	TRUE	السؤال هنا: مامعنى مايقول هذا الوزير؟ هل هو فى وعيه؟ ام انه جزء من رسالة التغييب الدينى التى يقوم بها علماء السلطان على مر الزمان!! لقد ابتليت الكثير من البلدان “الإسلامية” بهذا النوع من الشيوخ الذي طوع الدين حسب أهواء وغايات الأجهزة الأمنية والحكام، ودلسوا على الناس كي يقبلوا ما… https://t.co/jugPBZeMMX https://t.co/j0WLlUh27F	everyone	1	2011-11-20 18:40:13	Author/Editor-in-Chief of American and International Affairs/ Dr.SamXPlatform/ Political Activist, Ph.D.Cognitive Psychology/Doctoral Academic Researcher at GCU	[]	[]	[]	USA	FALSE	450870	4484	63914	626	42413	FALSE	125	السؤال هنا: مامعنى مايقول هذا الوزير؟ هل هو فى وعيه؟ ام انه جزء من رسالة التغييب الدينى التى يقوم بها علماء السلطان على مر الزمان لقد ابتليت الكثير من البلدان الإسلامية بهذا النوع من الشيوخ الذي طوع الدين حسب أهواء وغايات الأجهزة الأمنية والحكام، ودلسوا على الناس كي يقبلوا ما	278	{}	{}	0	0	[]	0
1671349201387626496	FALSE	821	1186	5809	299	272	2012257	417262550	ar	['مصر']	['Place']	[]	[]	['https://twitter.com/drhossamsamy65/status/1671349201387626496/photo/1']	[]	[]	[]	[]	[]	[]	TRUE	[]	2023-06-21 02:47:56	TRUE	القبض على كبير مفتشي التموين بمحافظة الاسماعيلية فى مصر بناء علي بلاغ من الإدارية العليا لحماية المستهلك واقتحام منزله وكانت المفاجئة انهم وجدوا 13 مليار جنية عدا ونقدا في بيته المكون من ثلاث طوابق.. عمار يامصر!!! https://t.co/3Gj33ThnEx	everyone	1	2011-11-20 18:40:13	Author/Editor-in-Chief of American and International Affairs/ Dr.SamXPlatform/ Political Activist, Ph.D.Cognitive Psychology/Doctoral Academic Researcher at GCU	[]	[]	[]	USA	FALSE	450870	4484	63914	626	42413	FALSE	191	القبض على كبير مفتشي التموين بمحافظة الاسماعيلية فى مصر بناء علي بلاغ من الإدارية العليا لحماية المستهلك واقتحام منزله وكانت المفاجئة انهم وجدوا 13 مليار جنية عدا ونقدا في بيته المكون من ثلاث طوابق.. عمار يامصر	212	{}	{}	0	1	[]	0
1662912122706165761	FALSE	12	111	192	7	1	87119	417262550	ar	['احمد موسي', 'اردوغان']	['Person', 'Person']	[]	[]	['https://t.co/Pfm2x4Z5WT']	[]	[]	['Person', 'Politician', 'Unified Twitter Taxonomy', 'Unified Twitter Taxonomy', 'Unified Twitter Taxonomy']	['Named people in the world like Nelson Mandela', 'Politicians in the world, like Joe Biden', 'A taxonomy of user interests. ', 'A taxonomy of user interests. ', 'A taxonomy of user interests. ']	['Recep Tayyip Erdoğan', 'Recep Tayyip Erdoğan', 'Politics', 'Recep Tayyip Erdoğan', 'Political figures']	['President of Turkey Recep Erdoğan', 'President of Turkey Recep Erdoğan', 'Politics', 'President of Turkey Recep Erdoğan', 'Politician']	TRUE	[]	2023-05-28 20:02:00	TRUE	احمد موسي يتهم حكومة اردوغان بتزوير الانتخابات التركية 😀😀😀 https://t.co/Pfm2x4Z5WT	everyone	1	2011-11-20 18:40:13	Author/Editor-in-Chief of American and International Affairs/ Dr.SamXPlatform/ Political Activist, Ph.D.Cognitive Psychology/Doctoral Academic Researcher at GCU	[]	[]	[]	USA	FALSE	450870	4484	63914	626	42413	FALSE	261	احمد موسي يتهم حكومة اردوغان بتزوير الانتخابات التركية	56	{'😀': 'grinning face'}	{'😀': 3}	3	2	[]	0
1697787540470689818	FALSE	10	3	101	0	1	20468	417262550	ar	[]	[]	[]	[]	['https://twitter.com/mog_china/status/1697683533219705060/video/1']	[]	[]	[]	[]	[]	[]	TRUE	[]	2023-09-02 01:44:27	TRUE	أجبرت الظروف القاسية في هونغ كونغ السلطات على إصدار أعلى مستوى من الإنذار بسبب إعصار ساولا. https://t.co/JwAiKaH71p	everyone	1	2011-11-20 18:40:13	Author/Editor-in-Chief of American and International Affairs/ Dr.SamXPlatform/ Political Activist, Ph.D.Cognitive Psychology/Doctoral Academic Researcher at GCU	[]	[]	[]	USA	FALSE	450870	4484	63914	626	42413	FALSE	9	أجبرت الظروف القاسية في هونغ كونغ السلطات على إصدار أعلى مستوى من الإنذار بسبب إعصار ساولا.	93	{}	{}	0	0	[]	0
1694882454476128497	FALSE	113	231	1110	30	31	312734	417262550	ar	['ترامب']	['Person']	[]	[]	['https://twitter.com/ProjectLincoln/status/1694878230250131619/video/1']	[]	[]	[]	[]	[]	[]	TRUE	[]	2023-08-25 01:20:41	TRUE	رد فعل الجماهير عند اذاعة صورة اعتقال ترامب الجنائية في السجن!!! https://t.co/5Yq8ghct9P	everyone	1	2011-11-20 18:40:13	Author/Editor-in-Chief of American and International Affairs/ Dr.SamXPlatform/ Political Activist, Ph.D.Cognitive Psychology/Doctoral Academic Researcher at GCU	[]	[]	[]	USA	FALSE	450870	4484	63914	626	42413	FALSE	36	رد فعل الجماهير عند اذاعة صورة اعتقال ترامب الجنائية في السجن	63	{}	{}	0	1	[]	0
1685808299222892544	FALSE	24	15	267	1	2	22060	417262550	ar	['أنتوني بوتس', 'واشنطن', 'روسيا', 'دنيبروبيتروفسك']	['Person', 'Place', 'Place', 'Place']	[]	[]	['https://twitter.com/drhossamsamy65/status/1685808299222892544/photo/1']	[]	[]	[]	[]	[]	[]	TRUE	[]	2023-07-31 00:23:13	TRUE	عن مصادر اعلامية روسية : "تم تأكيد مصرع الجنرال الأمريكي "أنتوني بوتس" وزعمت واشنطن انه لقي مصرعه في حادث تحطم طائرة. هذا الحدث صادف في نفس اليوم الذي دمرت روسيا مبنى جهاز الامن الاوكراني في دنيبروبيتروفسك. للعلم هو أكثر ضباط المارينز تواجداً بأوروبا و في اوكرانيا." https://t.co/sjvpj68KpL	everyone	0	2011-11-20 18:40:13	Author/Editor-in-Chief of American and International Affairs/ Dr.SamXPlatform/ Political Activist, Ph.D.Cognitive Psychology/Doctoral Academic Researcher at GCU	[]	[]	[]	USA	FALSE	450870	4484	63914	626	42413	FALSE	43	عن مصادر اعلامية روسية : تم تأكيد مصرع الجنرال الأمريكي أنتوني بوتس وزعمت واشنطن انه لقي مصرعه في حادث تحطم طائرة. هذا الحدث صادف في نفس اليوم الذي دمرت روسيا مبنى جهاز الامن الاوكراني في دنيبروبيتروفسك. للعلم هو أكثر ضباط المارينز تواجداً بأوروبا و في اوكرانيا.	264	{}	{}	0	4	[]	0
1691243974252539904	FALSE	95	64	1582	13	6	213130	417262550	ar	['تل', 'أبيب']	['Place', 'Place']	[]	[]	['https://twitter.com/US_World1/status/1691234907274514432/video/1']	[]	[]	[]	[]	[]	[]	TRUE	[]	2023-08-15 00:22:39	TRUE	عاجل ⚠️: انفجار ضخم في مصنع كيماويات شمال تل أبيب، ومخاوف من تسرب مواد كيميائية. https://t.co/IohP7nTqiJ	everyone	1	2011-11-20 18:40:13	Author/Editor-in-Chief of American and International Affairs/ Dr.SamXPlatform/ Political Activist, Ph.D.Cognitive Psychology/Doctoral Academic Researcher at GCU	[]	[]	[]	USA	FALSE	450870	4484	63914	626	42413	FALSE	66	عاجل : انفجار ضخم في مصنع كيماويات شمال تل أبيب، ومخاوف من تسرب مواد كيميائية.	81	{'⚠️': 'warning'}	{'⚠️': 1}	1	2	[]	0
1689724997185544192	FALSE	10	15	225	0	1	24349	417262550	ar	['محمد بازوم']	['Person']	[]	[]	['https://twitter.com/mog_china/status/1689514016039657477/video/1']	[]	[]	[]	[]	[]	[]	TRUE	[]	2023-08-10 19:46:47	TRUE	ظهر أول فيديو للرئيس المخلوع محمد بازوم. محاطاً بالجيش، يتجول في أراضي القصر الرئاسي.. https://t.co/KK8aUedZ0U	everyone	1	2011-11-20 18:40:13	Author/Editor-in-Chief of American and International Affairs/ Dr.SamXPlatform/ Political Activist, Ph.D.Cognitive Psychology/Doctoral Academic Researcher at GCU	[]	[]	[]	USA	FALSE	450870	4484	63914	626	42413	FALSE	74	ظهر أول فيديو للرئيس المخلوع محمد بازوم. محاطاً بالجيش، يتجول في أراضي القصر الرئاسي..	93	{}	{}	0	1	[]	0
1690849987976892416	FALSE	10	9	51	2	0	14777	417262550	ar	[]	[]	['الصحة_العالمية', 'كورونا']	[]	['https://twitter.com/AlHadath/status/1690679696852197376/video/1']	[]	[]	['Business Taxonomy', 'Business Taxonomy', 'Ongoing News Story', 'Unified Twitter Taxonomy']	['Categories within Brand Verticals that narrow down the scope of Brands', 'Categories within Brand Verticals that narrow down the scope of Brands', "Ongoing News Stories like 'Brexit'", 'A taxonomy of user interests. ']	['Food & Beverage Business', 'Gaming Business', 'COVID-19', 'COVID-19']	['Brands, companies, advertisers and every non-person handle with the profit intent and related to foods & beverages such as snacks, soft drinks, beers.', 'Brands, companies, advertisers and every non-person handle with the profit intent related to offline and online games such as gaming consoles, tabletop games, video game publishers', '', '']	TRUE	[]	2023-08-13 22:17:06	TRUE	ظهر في 51 دولة وأقلق منظمة #الصحة_العالمية.. هذا ما نعرفه عن "إيريس" متحور #كورونا الجديد "المثير للاهتمام" https://t.co/cNr1OvB0I2	everyone	0	2011-11-20 18:40:13	Author/Editor-in-Chief of American and International Affairs/ Dr.SamXPlatform/ Political Activist, Ph.D.Cognitive Psychology/Doctoral Academic Researcher at GCU	[]	[]	[]	USA	FALSE	450870	4484	63914	626	42413	FALSE	76	ظهر في 51 دولة وأقلق منظمة الصحة العالمية.. هذا ما نعرفه عن إيريس متحور كورونا الجديد المثير للاهتمام	105	{}	{}	0	0	[]	0
1690799189767163906	FALSE	28	19	144	2	4	34714	417262550	ar	[]	[]	['كورونا']	[]	['https://twitter.com/AJArabic/status/1690674556888096768/video/1']	[]	[]	['Business Taxonomy', 'Business Taxonomy', 'Ongoing News Story', 'Unified Twitter Taxonomy']	['Categories within Brand Verticals that narrow down the scope of Brands', 'Categories within Brand Verticals that narrow down the scope of Brands', "Ongoing News Stories like 'Brexit'", 'A taxonomy of user interests. ']	['Food & Beverage Business', 'Gaming Business', 'COVID-19', 'COVID-19']	['Brands, companies, advertisers and every non-person handle with the profit intent and related to foods & beverages such as snacks, soft drinks, beers.', 'Brands, companies, advertisers and every non-person handle with the profit intent related to offline and online games such as gaming consoles, tabletop games, video game publishers', '', '']	TRUE	[]	2023-08-13 18:55:15	TRUE	#كورونا يعاود الانتشار من جديد.. متحور "إيريس" يظهر سريعا في 51 دولة ومنظمة الصحة العالمية تحذر!!! https://t.co/0nTQD2DLZq	everyone	0	2011-11-20 18:40:13	Author/Editor-in-Chief of American and International Affairs/ Dr.SamXPlatform/ Political Activist, Ph.D.Cognitive Psychology/Doctoral Academic Researcher at GCU	[]	[]	[]	USA	FALSE	450870	4484	63914	626	42413	FALSE	76	كورونا يعاود الانتشار من جديد.. متحور إيريس يظهر سريعا في 51 دولة ومنظمة الصحة العالمية تحذر	95	{}	{}	0	0	[]	0
1688616940485410817	FALSE	11	3	235	1	1	15786	417262550	ar	['الجيش السوداني']	['Organization']	[]	[]	['https://twitter.com/drhossamsamy65/status/1688616940485410817/photo/1']	[]	[]	[]	[]	[]	[]	TRUE	[]	2023-08-07 18:23:46	TRUE	لأول مرة.. الجيش السوداني يقصف القصر الرئاسي الذي تسيطر عليه قوات الدعم السريع!!! https://t.co/JDFtlf8tu6	everyone	0	2011-11-20 18:40:13	Author/Editor-in-Chief of American and International Affairs/ Dr.SamXPlatform/ Political Activist, Ph.D.Cognitive Psychology/Doctoral Academic Researcher at GCU	[]	[]	[]	USA	FALSE	450870	4484	63914	626	42413	FALSE	78	لأول مرة.. الجيش السوداني يقصف القصر الرئاسي الذي تسيطر عليه قوات الدعم السريع	79	{}	{}	0	1	['الجيش السوداني']	1
1686170942420992000	FALSE	37	15	1308	1	3	48111	417262550	ar	[]	[]	[]	[]	['https://twitter.com/drhossamsamy65/status/1686170942420992000/photo/1', 'https://twitter.com/drhossamsamy65/status/1686170942420992000/photo/1']	[]	[]	[]	[]	[]	[]	TRUE	[]	2023-08-01 00:24:14	TRUE	احتفاء شعبي كبير في رئيس بوركينا فاسو بعد خطابه التاريخي. https://t.co/U8avmUxhK8	everyone	1	2011-11-20 18:40:13	Author/Editor-in-Chief of American and International Affairs/ Dr.SamXPlatform/ Political Activist, Ph.D.Cognitive Psychology/Doctoral Academic Researcher at GCU	[]	[]	[]	USA	FALSE	450870	4484	63914	626	42413	FALSE	89	احتفاء شعبي كبير في رئيس بوركينا فاسو بعد خطابه التاريخي.	58	{}	{}	0	0	[]	0
1677886680542457856	FALSE	127	21	378	3	5	65431	417262550	ar	[]	[]	[]	[]	['https://twitter.com/M0SC0W0/status/1677864504317583360']	[]	[]	[]	[]	[]	[]	TRUE	[]	2023-07-09 03:45:32	TRUE	فرنسي يقوم بدهس جموع من المهاجرين بسيارته!!! https://t.co/wTFN8WRY1E	everyone	1	2011-11-20 18:40:13	Author/Editor-in-Chief of American and International Affairs/ Dr.SamXPlatform/ Political Activist, Ph.D.Cognitive Psychology/Doctoral Academic Researcher at GCU	[]	[]	[]	USA	FALSE	450870	4484	63914	626	42413	FALSE	139	فرنسي يقوم بدهس جموع من المهاجرين بسيارته	42	{}	{}	0	0	[]	0
1675868511623602176	FALSE	282	311	2436	29	51	1158694	417262550	ar	['لندن']	['Place']	[]	[]	['https://twitter.com/Sprinter99800/status/1675867463366344707']	[]	[]	['Cities']	['Cities around the world']	['London']	['london']	TRUE	[]	2023-07-03 14:06:03	FALSE	العنف المجتمعي ينتقل لشوارع لندن !! https://t.co/NpkDY19GsL	everyone	1	2011-11-20 18:40:13	Author/Editor-in-Chief of American and International Affairs/ Dr.SamXPlatform/ Political Activist, Ph.D.Cognitive Psychology/Doctoral Academic Researcher at GCU	[]	[]	[]	USA	FALSE	450870	4484	63914	626	42413	FALSE	148	العنف المجتمعي ينتقل لشوارع لندن	34	{}	{}	0	1	[]	0
1674915027608895489	FALSE	28	18	285	3	1	30750	417262550	ar	['باريس']	['Place']	[]	[]	['https://twitter.com/drhossamsamy65/status/1674915027608895489/photo/1']	[]	[]	['Business Taxonomy']	['Categories within Brand Verticals that narrow down the scope of Brands']	['Gaming Business']	['Brands, companies, advertisers and every non-person handle with the profit intent related to offline and online games such as gaming consoles, tabletop games, video game publishers']	TRUE	[]	2023-06-30 22:57:15	TRUE	متظاهرون يقتحمون حديقة باريس ويطلقون 3 أسود وحصان وفيل وحمار وحشي. https://t.co/XpBpd0KtH7	everyone	1	2011-11-20 18:40:13	Author/Editor-in-Chief of American and International Affairs/ Dr.SamXPlatform/ Political Activist, Ph.D.Cognitive Psychology/Doctoral Academic Researcher at GCU	[]	[]	[]	USA	FALSE	450870	4484	63914	626	42413	FALSE	159	متظاهرون يقتحمون حديقة باريس ويطلقون 3 أسود وحصان وفيل وحمار وحشي.	67	{}	{}	0	1	[]	0
1674166912144535553	FALSE	6	5	136	0	0	28137	417262550	ar	[]	[]	['القنصلية_الأميركية', 'جدة']	[]	['https://twitter.com/drhossamsamy65/status/1674166912144535553/photo/1']	[]	[]	[]	[]	[]	[]	TRUE	[]	2023-06-28 21:24:31	TRUE	عاجل ⚠️: تبادل لإطلاق النار أمام #القنصلية_الأميركية في #جدة ومقتل المهاجم وحارس أمن!!! https://t.co/q9nkeN5tUE	everyone	0	2011-11-20 18:40:13	Author/Editor-in-Chief of American and International Affairs/ Dr.SamXPlatform/ Political Activist, Ph.D.Cognitive Psychology/Doctoral Academic Researcher at GCU	[]	[]	[]	USA	FALSE	450870	4484	63914	626	42413	FALSE	167	عاجل : تبادل لإطلاق النار أمام القنصلية الأميركية في جدة ومقتل المهاجم وحارس أمن	81	{'⚠️': 'warning'}	{'⚠️': 1}	1	0	[]	0
1668243591574048770	FALSE	142	303	1226	33	48	805597	417262550	ar	['الكويت']	['Place']	[]	[]	['https://twitter.com/drhossamsamy65/status/1668243591574048770/photo/1']	[]	[]	[]	[]	[]	[]	TRUE	[]	2023-06-12 13:07:21	TRUE	عاجل ⚠️: خمسون مليون إطار يحترق في الكويت منذ أكثر من أسبوع ويمكن رؤية الحريق العملاق حتى من الفضاء. هذه كارثة بيئية وستكون لها تداعيات بيئية كارثية على المنطقة والعالم. https://t.co/yy6CykGBGx	everyone	1	2011-11-20 18:40:13	Author/Editor-in-Chief of American and International Affairs/ Dr.SamXPlatform/ Political Activist, Ph.D.Cognitive Psychology/Doctoral Academic Researcher at GCU	[]	[]	[]	USA	FALSE	450870	4484	63914	626	42413	FALSE	213	عاجل : خمسون مليون إطار يحترق في الكويت منذ أكثر من أسبوع ويمكن رؤية الحريق العملاق حتى من الفضاء. هذه كارثة بيئية وستكون لها تداعيات بيئية كارثية على المنطقة والعالم.	168	{'⚠️': 'warning'}	{'⚠️': 1}	1	1	[]	0
1662586684347744256	FALSE	13	17	159	0	0	37706	417262550	ar	[]	[]	[]	[]	['https://twitter.com/drhossamsamy65/status/1662586684347744256/photo/1']	[]	[]	[]	[]	[]	[]	TRUE	[]	2023-05-27 22:28:49	TRUE	اسر جنود تابعين للحرس الثوري "من ثكناتهم العسكرية في داخل الاراضي الايرانية من قبل قوات طالبان !! https://t.co/UIzeihudYF	everyone	1	2011-11-20 18:40:13	Author/Editor-in-Chief of American and International Affairs/ Dr.SamXPlatform/ Political Activist, Ph.D.Cognitive Psychology/Doctoral Academic Researcher at GCU	[]	[]	[]	USA	FALSE	450870	4484	63914	626	42413	FALSE	267	اسر جنود تابعين للحرس الثوري من ثكناتهم العسكرية في داخل الاراضي الايرانية من قبل قوات طالبان	95	{}	{}	0	0	[]	0
1656307612567195651	FALSE	65	29	553	5	5	59195	417262550	ar	['تل ابيب', 'غزة']	['Place', 'Place']	[]	[]	['https://twitter.com/drhossamsamy65/status/1656307612567195651/photo/1']	[]	[]	[]	[]	[]	[]	TRUE	[]	2023-05-10 14:38:02	TRUE	ارتماء الكثير من الاسرائيليين فى شوارع تل ابيب على الارض للحماية من صواريخ غزة بعد اطلاق صفارات الانذار!!! https://t.co/iUwV3FsGk5	everyone	1	2011-11-20 18:40:13	Author/Editor-in-Chief of American and International Affairs/ Dr.SamXPlatform/ Political Activist, Ph.D.Cognitive Psychology/Doctoral Academic Researcher at GCU	[]	[]	[]	USA	FALSE	450870	4484	63914	626	42413	FALSE	303	ارتماء الكثير من الاسرائيليين فى شوارع تل ابيب على الارض للحماية من صواريخ غزة بعد اطلاق صفارات الانذار	105	{}	{}	0	2	[]	0
1646649864778809346	FALSE	9	13	98	2	0	20832	417262550	ar	[]	[]	['السودان', 'Sudan']	[]	['https://twitter.com/drhossamsamy65/status/1646649864778809346/photo/1']	[]	[]	[]	[]	[]	[]	TRUE	[]	2023-04-13 23:01:35	TRUE	إعلام الجيش السودانى : رئيس مجلس السيادة القائد العام للجيش الفريق أول البرهان يتفقد سلاح المدرعات ويتناول الإفطار وسط الجنود ويشيد بروحهم المعنوية العالية #السودان #Sudan https://t.co/SoCOXpfoNH	everyone	0	2011-11-20 18:40:13	Author/Editor-in-Chief of American and International Affairs/ Dr.SamXPlatform/ Political Activist, Ph.D.Cognitive Psychology/Doctoral Academic Researcher at GCU	[]	[]	[]	USA	FALSE	450870	4484	63914	626	42413	FALSE	365	إعلام الجيش السودانى : رئيس مجلس السيادة القائد العام للجيش الفريق أول البرهان يتفقد سلاح المدرعات ويتناول الإفطار وسط الجنود ويشيد بروحهم المعنوية العالية السودان	165	{}	{}	0	0	[]	0
1646455850028941314	FALSE	48	36	955	2	2	79736	417262550	ar	[]	[]	[]	[]	['https://twitter.com/drhossamsamy65/status/1646455850028941314/photo/1']	[]	[]	[]	[]	[]	[]	TRUE	[]	2023-04-13 10:10:38	TRUE	الرئيس الصيني مخاطباً جيشه بالزي العسكري: "استعدوا للعمليات القتالية الحقيقية".!! https://t.co/XMveWajHZO	everyone	1	2011-11-20 18:40:13	Author/Editor-in-Chief of American and International Affairs/ Dr.SamXPlatform/ Political Activist, Ph.D.Cognitive Psychology/Doctoral Academic Researcher at GCU	[]	[]	[]	USA	FALSE	450870	4484	63914	626	42413	FALSE	369	الرئيس الصيني مخاطباً جيشه بالزي العسكري: استعدوا للعمليات القتالية الحقيقية.	79	{}	{}	0	0	[]	0
1637538350671314945	FALSE	30	30	674	3	1	48418	417262550	ar	['ترامب', 'ترامب', 'نيويورك']	['Person', 'Person', 'Place']	[]	[]	['https://twitter.com/drhossamsamy65/status/1637538350671314945/photo/1']	[]	[]	['Cities']	['Cities around the world']	['New York City']	['New York City']	TRUE	[]	2023-03-19 19:35:41	TRUE	عاجل ⚠️: الآن ، أنصار الرئيس ترامب يتجمعون حول برج ترامب في مدينة نيويورك.. https://t.co/KdJsBcKOrQ	everyone	1	2011-11-20 18:40:13	Author/Editor-in-Chief of American and International Affairs/ Dr.SamXPlatform/ Political Activist, Ph.D.Cognitive Psychology/Doctoral Academic Researcher at GCU	[]	[]	[]	USA	FALSE	450870	4484	63914	626	42413	FALSE	423	عاجل : الآن ، أنصار الرئيس ترامب يتجمعون حول برج ترامب في مدينة نيويورك..	74	{'⚠️': 'warning'}	{'⚠️': 1}	1	3	[]	0
1634616751064248322	FALSE	6	5	56	1	0	7248	417262550	ar	['للسعودية', 'العراق']	['Place', 'Place']	[]	[]	['https://twitter.com/drhossamsamy65/status/1634616751064248322/photo/1']	[]	[]	['Sports Event', 'Sports Team', 'Events [Entity Service]', 'Soccer Match', 'Business Taxonomy', 'Unified Twitter Taxonomy', 'Unified Twitter Taxonomy', 'Unified Twitter Taxonomy', 'Sports Event', 'Events [Entity Service]', 'Soccer Match']	['', 'A sports team organization, like Arsenal and the Boston Celtics', 'Real world events. ', 'Sports Event specific to Soccer matches', 'Categories within Brand Verticals that narrow down the scope of Brands', 'A taxonomy of user interests. ', 'A taxonomy of user interests. ', 'A taxonomy of user interests. ', '', 'Real world events. ', 'Sports Event specific to Soccer matches']	['Al-Ettifaq vs Al-Ittihad', 'Ettifaq FC', 'Al-Ettifaq vs Al-Ittihad', 'Al-Ettifaq vs Al-Ittihad', 'Sports & Fitness Business', 'Soccer', 'Sports', 'Ettifaq FC', 'Al-Ettifaq vs Al-Ittihad', 'Al-Ettifaq vs Al-Ittihad', 'Al-Ettifaq vs Al-Ittihad']	['Al-Ettifaq vs Al-Ittihad match! Explore the latest news, must-see highlights and the can’t-miss moments right here. \n\nPhoto via @Ettifaq\n', '', 'Al-Ettifaq vs Al-Ittihad match! Explore the latest news, must-see highlights and the can’t-miss moments right here. \n\nPhoto via @Ettifaq\n', 'Al-Ettifaq vs Al-Ittihad match! Explore the latest news, must-see highlights and the can’t-miss moments r…	TRUE	[]	2023-03-11 18:06:17	TRUE	تبعات الاتفاق السعودى الايرانى مستمرة فى الظهور السريع على الساحة العربية: بدأت إزالة الصور المسيئة للسعودية في شوارع العراق.!! https://t.co/XkHtW5o4KH	everyone	1	2011-11-20 18:40:13	Author/Editor-in-Chief of American and International Affairs/ Dr.SamXPlatform/ Political Activist, Ph.D.Cognitive Psychology/Doctoral Academic Researcher at GCU	[]	[]	[]	USA	FALSE	450870	4484	63914	626	42413	FALSE	433	تبعات الاتفاق السعودى الايرانى مستمرة فى الظهور السريع على الساحة العربية: بدأت إزالة الصور المسيئة للسعودية في شوارع العراق.	126	{}	{}	0	2	[]	0
1621536863268782082	FALSE	31	65	431	10	6	89476	417262550	ar	['بالولايات المتحدة الامريكية']	['Place']	[]	[]	['https://twitter.com/drhossamsamy65/status/1621536863268782082/photo/1']	[]	[]	[]	[]	[]	[]	TRUE	[]	2023-02-03 15:51:29	TRUE	عاجل⚠️: اول صورة مقربة لبالون التجسس الصينى فوق ولاية مونتانا الان بالولايات المتحدة الامريكية.. https://t.co/l5O5iZKvYQ	everyone	1	2011-11-20 18:40:13	Author/Editor-in-Chief of American and International Affairs/ Dr.SamXPlatform/ Political Activist, Ph.D.Cognitive Psychology/Doctoral Academic Researcher at GCU	[]	[]	[]	USA	FALSE	450870	4484	63914	626	42413	FALSE	507	عاجل: اول صورة مقربة لبالون التجسس الصينى فوق ولاية مونتانا الان بالولايات المتحدة الامريكية..	95	{'⚠️': 'warning'}	{'⚠️': 1}	1	1	[]	0
1695839887105081675	FALSE	127	92	805	8	18	61165	1525516876159361024	ar	[]	[]	['سوريا']	[]	['https://twitter.com/antfadt/status/1695839887105081675/video/1']	[]	[]	['Person', 'Politician', 'Unified Twitter Taxonomy', 'Unified Twitter Taxonomy', 'Unified Twitter Taxonomy']	['Named people in the world like Nelson Mandela', 'Politicians in the world, like Joe Biden', 'A taxonomy of user interests. ', 'A taxonomy of user interests. ', 'A taxonomy of user interests. ']	['Bashar al-Assad', 'Bashar al-Assad', 'Politics', 'Political figures', 'Bashar al-Assad']	['Syrian President Bashar al-Assad', 'Syrian President Bashar al-Assad', 'Politics', 'Politician', 'Syrian President Bashar al-Assad']	TRUE	[]	2023-08-27 16:45:10	TRUE	عاجل .....انشقاق اربع ضباط أخوة من جيش بشار الاسد المجرم #سوريا https://t.co/OO36tpRO24	everyone	1	2022-05-14 16:43:22	السلام الجمهوري العراقي السلام الجمهوري الوطني الشرعي للعراق https://t.co/iCUJbBGGq6	['https://youtu.be/2wO7dSdwYX0']	[]	[]		FALSE	11905	5827	3996	8	6414	FALSE	16	عاجل .....انشقاق اربع ضباط أخوة من جيش بشار الاسد المجرم سوريا	63	{}	{}	0	0	[]	0
1692644773692113202	FALSE	3	2	36	1	1	4507	1525516876159361024	ar	['الكويت']	['Place']	['ام_قصر_عراقيه', 'خور_عبدالله_التميمي_عراقية']	[]	['https://twitter.com/antfadt/status/1692644773692113202/video/1']	[]	[]	[]	[]	[]	[]	TRUE	[]	2023-08-18 21:08:56	TRUE	الكويت اول دولة خليجيه تعلن افلاسها #ام_قصر_عراقيه #خور_عبدالله_التميمي_عراقية https://t.co/hC64zP4lMs	everyone	1	2022-05-14 16:43:22	السلام الجمهوري العراقي السلام الجمهوري الوطني الشرعي للعراق https://t.co/iCUJbBGGq6	['https://youtu.be/2wO7dSdwYX0']	[]	[]		FALSE	11905	5827	3996	8	6414	FALSE	55	الكويت اول دولة خليجيه تعلن افلاسها ام قصر عراقيه خور عبدالله التميمي عراقية	78	{}	{}	0	1	[]	0
1684662069923086337	FALSE	10	5	72	0	1	2014	1525516876159361024	ar	[]	[]	['بالفيديو']	[]	['https://twitter.com/antfadt/status/1684662069923086337/video/1']	[]	[]	[]	[]	[]	[]	TRUE	[]	2023-07-27 20:28:31	TRUE	#بالفيديو اللحظات الأولى لمحاولة نرويجي مجرم حرق نسخة من المصحف الشريف وهجوم مواطن عراقي الجنسية عليه.. https://t.co/YCpgCzu1cj	everyone	1	2022-05-14 16:43:22	السلام الجمهوري العراقي السلام الجمهوري الوطني الشرعي للعراق https://t.co/iCUJbBGGq6	['https://youtu.be/2wO7dSdwYX0']	[]	[]		FALSE	11905	5827	3996	8	6414	FALSE	103	بالفيديو اللحظات الأولى لمحاولة نرويجي مجرم حرق نسخة من المصحف الشريف وهجوم مواطن عراقي الجنسية عليه..	104	{}	{}	0	0	[]	0
1662741926423011330	FALSE	33	8	214	3	3	13291	1525516876159361024	ar	['إيران']	['Place']	[]	[]	['https://twitter.com/antfadt/status/1662741926423011330/video/1']	[]	[]	['Sports Event', 'Events [Entity Service]', 'Cricket Match']	['', 'Real world events. ', 'Sports Event specific to Cricket matches']	['Chennai Super Kings vs Lucknow Super Giants', 'Chennai Super Kings vs Lucknow Super Giants', 'Chennai Super Kings vs Lucknow Super Giants']	['', '', '']	TRUE	[]	2023-05-28 08:45:42	TRUE	طالبان تدمير ما مجموعه 18 منشأة حدودية إيرانية كان الحرس الثوري قد نفذ هجمات إرهابية من هذه البؤر الاستيطانية الضخمة، إيران لم تقم بمقاومة قوية حتى الآن... https://t.co/Nx2yMIPeAi	everyone	1	2022-05-14 16:43:22	السلام الجمهوري العراقي السلام الجمهوري الوطني الشرعي للعراق https://t.co/iCUJbBGGq6	['https://youtu.be/2wO7dSdwYX0']	[]	[]		FALSE	11905	5827	3996	8	6414	FALSE	269	طالبان تدمير ما مجموعه 18 منشأة حدودية إيرانية كان الحرس الثوري قد نفذ هجمات إرهابية من هذه البؤر الاستيطانية الضخمة، إيران لم تقم بمقاومة قوية حتى الآن...	157	{}	{}	0	1	[]	0
1645010457705558016	FALSE	3	7	68	1	0	17078	1525516876159361024	ar	['إيران', 'ايران', 'شارع نمر النمر', 'السعودية']	['Place', 'Place', 'Place', 'Place']	[]	[]	['https://twitter.com/antfadt/status/1645010457705558016/photo/1']	[]	[]	[]	[]	[]	[]	TRUE	[]	2023-04-09 10:27:10	TRUE	إيران : السلطات الأمنيةفي ايران تزيل لوحة "شارع نمر النمر" التي كانت قد وضعتها مقابل القنصلية السعودية في مشهد ، قبيل وصول الوفد السعودي https://t.co/Wlw8LwOt8J	everyone	1	2022-05-14 16:43:22	السلام الجمهوري العراقي السلام الجمهوري الوطني الشرعي للعراق https://t.co/iCUJbBGGq6	['https://youtu.be/2wO7dSdwYX0']	[]	[]		FALSE	11905	5827	3996	8	6414	FALSE	377	إيران : السلطات الأمنيةفي ايران تزيل لوحة شارع نمر النمر التي كانت قد وضعتها مقابل القنصلية السعودية في مشهد ، قبيل وصول الوفد السعودي	136	{}	{}	0	4	[]	0
1696998636435997146	FALSE	4	1	30	0	0	2134	128490459	ar	[]	[]	[]	[]	['https://twitter.com/PalinfoAr/status/1696998636435997146/video/1']	[]	[]	[]	[]	[]	[]	TRUE	[]	2023-08-30 21:29:38	TRUE	لحظة إلقاء عبوة ناسفة أخرى باتجاه قوات الاحتلال. https://t.co/gAScs84Fxs	everyone	1	2010-04-01 08:14:52	‏المركز الفلسطيني للإعلام .. صوت فلسطين إلى العالم .. وصوت العالم إلى فلسطين	[]	[]	[]	فلسطين	FALSE	530919	43	478429	1245	272	FALSE	17	لحظة إلقاء عبوة ناسفة أخرى باتجاه قوات الاحتلال.	49	{}	{}	0	0	[]	0
1619061618830368769	FALSE	2	6	31	11	1	4721	128490459	ar	['غزة', 'القدس', 'المحتلة']	['Place', 'Place', 'Place']	[]	[]	['https://twitter.com/PalinfoAr/status/1619061618830368769/photo/1', 'https://twitter.com/PalinfoAr/status/1619061618830368769/photo/1', 'https://twitter.com/PalinfoAr/status/1619061618830368769/photo/1', 'https://twitter.com/PalinfoAr/status/1619061618830368769/photo/1']	[]	[]	['Business Taxonomy']	['Categories within Brand Verticals that narrow down the scope of Brands']	['Food & Beverage Business']	['Brands, companies, advertisers and every non-person handle with the profit intent and related to foods & beverages such as snacks, soft drinks, beers.']	TRUE	[]	2023-01-27 19:55:45	TRUE	تغطية صحفية: "فرحة وبهجة أهالي غزة بالعملية البطولية في القدس المحتلة" https://t.co/6nttJbJn5n	everyone	0	2010-04-01 08:14:52	‏المركز الفلسطيني للإعلام .. صوت فلسطين إلى العالم .. وصوت العالم إلى فلسطين	[]	[]	[]	فلسطين	FALSE	530919	43	478429	1245	272	FALSE	227	تغطية صحفية: فرحة وبهجة أهالي غزة بالعملية البطولية في القدس المحتلة	69	{}	{}	0	3	[]	0
1519430413885878277	FALSE	27	2	155	5	0	0	128490459	ar	['المسجد الأقصى']	['Place']	['فلسطين', 'ليلةـالقدر']	[]	['https://twitter.com/PalinfoAr/status/1519430413885878277/photo/1']	[]	[]	['News Vertical']	['News Categories like Entertainment or Technology']	['Political News']	['Political News']	TRUE	[]	2022-04-27 21:36:54	TRUE	ربع مليون مُصلِّ يُحيون ليلة القدر في المسجد الأقصى المبارك #فلسطين #ليلةـالقدر https://t.co/Yjt0tm5Dvs	everyone	0	2010-04-01 08:14:52	‏المركز الفلسطيني للإعلام .. صوت فلسطين إلى العالم .. وصوت العالم إلى فلسطين	[]	[]	[]	فلسطين	FALSE	530919	43	478429	1245	272	FALSE	389	ربع مليون مُصلِّ يُحيون ليلة القدر في المسجد الأقصى المبارك فلسطين ليلةـالقدر	79	{}	{}	0	1	[]	0
754826080767401984	FALSE	17	1	24	0	0	0	128490459	ar	[]	[]	['شاهد', 'أردوغان']	[]	['https://twitter.com/PalinfoAr/status/754826080767401984/video/1']	[]	[]	[]	[]	[]	[]	TRUE	[]	2016-07-17 23:52:16	TRUE	#شاهد.. #أردوغان يبكي بحرقة خلال تشييع مستشاره اورل التشاك، والذي قتل برصاص عناصر الإنقلاب . https://t.co/EXbb1EWZ46	everyone	0	2010-04-01 08:14:52	‏المركز الفلسطيني للإعلام .. صوت فلسطين إلى العالم .. وصوت العالم إلى فلسطين	[]	[]	[]	فلسطين	FALSE	530919	43	478429	1245	272	FALSE	481	شاهد.. أردوغان يبكي بحرقة خلال تشييع مستشاره اورل التشاك، والذي قتل برصاص عناصر الإنقلاب .	92	{}	{}	0	0	[]	0
697816238563663872	FALSE	14	0	7	0	0	0	128490459	ar	['جيمس مارتن يُغمى']	['Person']	['فيديو']	[]	['https://twitter.com/PalinfoAr/status/697816238563663872/video/1']	[]	[]	[]	[]	[]	[]	TRUE	[]	2016-02-11 16:15:30	TRUE	#فيديو ..الجنرال الأميركي جيمس مارتن يُغمى عليه خلال مؤتمر https://t.co/qh19HZiY1S	everyone	0	2010-04-01 08:14:52	‏المركز الفلسطيني للإعلام .. صوت فلسطين إلى العالم .. وصوت العالم إلى فلسطين	[]	[]	[]	فلسطين	FALSE	530919	43	478429	1245	272	FALSE	759	فيديو ..الجنرال الأميركي جيمس مارتن يُغمى عليه خلال مؤتمر	58	{}	{}	0	1	[]	0
1235450355959443456	FALSE	36	8	160	5	2	0	128490459	ar	[]	[]	[]	[]	['https://twitter.com/PalinfoAr/status/1235450355959443456/video/1']	[]	[]	[]	[]	[]	[]	TRUE	[]	2020-03-05 06:21:33	TRUE	اضرب فمن كفيك ينهمر المطر... لحظة استهداف قوات الاحتلال بالزجاجات الحارقة خلال اقتحامها حي الطيرة في رام الله فجر اليوم. تصوير : كريم خمايسة https://t.co/hdzcJByYVd	everyone	0	2010-04-01 08:14:52	‏المركز الفلسطيني للإعلام .. صوت فلسطين إلى العالم .. وصوت العالم إلى فلسطين	[]	[]	[]	فلسطين	FALSE	530919	43	478429	1245	272	FALSE	796	اضرب فمن كفيك ينهمر المطر... لحظة استهداف قوات الاحتلال بالزجاجات الحارقة خلال اقتحامها حي الطيرة في رام الله فجر اليوم. تصوير : كريم خمايسة	142	{}	{}	0	0	[]	0
1697202360563450337	FALSE	78	3	292	1	1	5046	982930438414131200	ar	[]	[]	[]	[]	['https://twitter.com/ghali_zber/status/1697202360563450337/video/1']	[]	[]	[]	[]	[]	[]	TRUE	[]	2023-08-31 10:59:09	TRUE	افشال محاولة هروب رئيس البرلمان الغابوني تجيب عن سؤال أين الثروة؟ المغرب والغابون وجهان لعملة واحدة. https://t.co/ICvWX6unwb	everyone	1	2018-04-08 10:37:33	كاتب وباحث في المركز الصحراوي-الفرنسي للدراسات والتوثيق أحمد بابا مسكة Writer & Researcher at the Saharawi-french center of studies & documentation A.B. Meske	[]	[]	[]		FALSE	15983	1815	7109	17	23658	FALSE	18	افشال محاولة هروب رئيس البرلمان الغابوني تجيب عن سؤال أين الثروة؟ المغرب والغابون وجهان لعملة واحدة.	101	{}	{}	0	0	[]	0
1696641366757978497	FALSE	24	28	109	5	6	18783	1900052239	ar	[]	[]	['عراقي', 'العرب', 'السوريين', 'دير_الزور', 'اليهود', 'العشائر_العربية', 'قسد_الارهاب_الأصفر', 'قسد_وجه_داعش_الاخر']	[]	['https://twitter.com/i/web/status/1696641366757978497', 'https://twitter.com/k_alsharki/status/1696641366757978497/video/1']	[]	[]	[]	[]	[]	[]	TRUE	[]	2023-08-29 21:49:58	TRUE	قيادي #عراقي في تنظيم PKK الارهابي يتوعد بسحق وقتل #العرب #السوريين في مناطق وبلدات #دير_الزور ومعاملتهم معاملة #اليهود حيث تدور اشتباكات عنيفة بين #العشائر_العربية وهذه التنظيمات الارهابية التي هاجمت القرى والبلدات العربية. #قسد_الارهاب_الأصفر #قسد_وجه_داعش_الاخر… https://t.co/wG1xmS5wS7 https://t.co/NulCbKkbk9	everyone	1	2013-09-24 10:37:29	Journalist and researcher in Arab and international political affairs إعلامي سوري متخصص في الشؤون السياسية العربية والدولية - كاتب و محلل سياسي	[]	[]	[]	Syria	FALSE	5487	1847	4721	24	7652	FALSE	19	قيادي عراقي في تنظيم الارهابي يتوعد بسحق وقتل العرب السوريين في مناطق وبلدات دير الزور ومعاملتهم معاملة اليهود حيث تدور اشتباكات عنيفة بين العشائر العربية وهذه التنظيمات الارهابية التي هاجمت القرى والبلدات العربية. قسد الارهاب الأصفر قسد وجه داعش الاخر	257	{}	{}	0	0	[]	0
1696387235015163916	FALSE	134	21	352	11	19	37250	1248617521730608896	ar	['أليكس جونز']	['Person']	['دبي']	[]	['https://twitter.com/Tima_Yu/status/1696387235015163916/video/1']	[]	[]	[]	[]	[]	[]	TRUE	[]	2023-08-29 05:00:08	TRUE	خلال القمة العالمية للحكومات في #دبي تمّ خرق البث المباشر من قبل أليكس جونز وأنهال عليهم بالشتائم. https://t.co/jBQPd3RZG5	everyone	1	2020-04-10 14:23:42	إذا فهمنا الماضي من البديهي أن نعرف ماذا يجري حولنا	[]	[]	[]		FALSE	32058	522	22162	57	45754	FALSE	20	خلال القمة العالمية للحكومات في دبي تمّ خرق البث المباشر من قبل أليكس جونز وأنهال عليهم بالشتائم.	98	{}	{}	0	1	[]	0
1696489507783057662	FALSE	1706	410	5053	110	1328	2141124	528670264	ar	[]	[]	[]	[]	['https://twitter.com/alruhaily_a/status/1696489507783057662/video/1']	[]	[]	[]	[]	[]	[]	TRUE	[]	2023-08-29 11:46:32	TRUE	بيدخلونه السجن قلب الطاولة عليهم ‼️ https://t.co/WWRboMEFBF	everyone	1	2012-03-18 17:01:42	أكتب / أنقل / أُترجم	[]	[]	[]	الرياض	FALSE	348338	993	15539	163	18924	FALSE	21	بيدخلونه السجن قلب الطاولة عليهم	36	{'‼️': 'double exclamation mark'}	{'‼️': 1}	1	0	[]	0
1695830876301447460	FALSE	0	0	0	0	0	177	1001086604155522944	ar	['ليبيا', 'إسرائيل', 'الجزائر']	['Place', 'Place', 'Place']	[]	[]	['https://twitter.com/aminwolf06/status/1695829752559382530']	[]	[]	['Place']	['Named places in the world, like Fenway Park']	['Tunisia (تونس)']	['']	TRUE	[]	2023-08-27 16:09:22	TRUE	ليبيا تطبع مع إسرائيل... الجزائر https://t.co/PsXa1dzle7	everyone	1	2018-05-28 13:03:40	لا اله الا الله محمد رسول الله . الجزائر دائما وابدا 🇩🇿	[]	[]	[]	Paris, France	FALSE	109	178	8035	0	15763	FALSE	30	ليبيا تطبع مع إسرائيل... الجزائر	33	{}	{}	0	3	[]	0
1696859486646899012	FALSE	127	41	602	11	11	18722	2992165984	ar	['فرنسا', 'محمد السادس', 'فرنسا']	['Place', 'Person', 'Place']	['علي_بونغو', 'الصحراء_الغربية', 'الجزائر', 'Gabon']	[]	['https://twitter.com/aures_54/status/1696859486646899012/video/1']	[]	[]	[]	[]	[]	[]	TRUE	[]	2023-08-30 12:16:42	FALSE	بعد إسقاط عميل فرنسا #علي_بونغو خرج متظاهرون غابونيون إلى الشوارع ورفعوا شعارات كُتب عليها "محمد السادس و بونغو قتلة مرتبطين"، "البوليساريو والمقاومة الغابونية، نفس المعركة، نفس العدو، المغرب" ونددوا بإحتلال المروك لـ #الصحراء_الغربية إفريقيا تلفظ عملاء فرنسا #الجزائر #Gabon ⬇️ https://t.co/NiO9y5ytCV	everyone	1	2015-01-22 14:09:25	The Martyr Laghrour Abbes said : The day which passes without combating France is a betrayal 🇩🇿	[]	[]	[]	Aurès, Algeria	FALSE	13629	373	22086	15	42255	FALSE	22	بعد إسقاط عميل فرنسا علي بونغو خرج متظاهرون غابونيون إلى الشوارع ورفعوا شعارات كُتب عليها محمد السادس و بونغو قتلة مرتبطين، البوليساريو والمقاومة الغابونية، نفس المعركة، نفس العدو، المغرب ونددوا بإحتلال المروك لـ الصحراء الغربية إفريقيا تلفظ عملاء فرنسا الجزائر	265	{'⬇️': 'down arrow'}	{'⬇️': 1}	1	3	[]	0
1696612331038360017	FALSE	22	4	191	1	0	3446	1543382774282863104	ar	['حي سيف الدولة']	['Place']	['حلب_الشهباء', 'الثورة_السورية_العظيمة', 'FREESYRIA']	[]	['https://twitter.com/abwkhly55016496/status/1696612331038360017/video/1']	[]	[]	[]	[]	[]	[]	TRUE	[]	2023-08-29 19:54:35	TRUE	#حلب_الشهباء مظاهرة في حي سيف الدولة والتكبير يصدع في حلب . #الثورة_السورية_العظيمة #FREESYRIA https://t.co/vSp3xZhD8M	everyone	1	2022-07-02 23:57:28	لن نتنازل عن ثورتنا ومبادئنا واهدافنا انا لست معارض بل ثائر . الثورة فكرة والفكرة لاتموت	[]	[]	[]		FALSE	1945	2046	7375	3	85766	FALSE	24	حلب الشهباء مظاهرة في حي سيف الدولة والتكبير يصدع في حلب . الثورة السورية العظيمة	85	{}	{}	0	1	[]	0
1697946167043068112	FALSE	66	33	254	11	0	10880	1543382774282863104	ar	['أمريكا']	['Place']	['الثورة_السورية_العظيية', 'FREESYRIA']	[]	['https://twitter.com/abwkhly55016496/status/1697946167043068112/video/1']	[]	[]	[]	[]	[]	[]	TRUE	[]	2023-09-02 12:14:47	TRUE	شباب بدون مسخرة وضحك عليهن قادة قسد باعتنا أمريكا😅 انا شمتااااان بقسد كلاب الاسد #الثورة_السورية_العظيية #FREESYRIA https://t.co/kZzwQM0KRs	everyone	1	2022-07-02 23:57:28	لن نتنازل عن ثورتنا ومبادئنا واهدافنا انا لست معارض بل ثائر . الثورة فكرة والفكرة لاتموت	[]	[]	[]		FALSE	1945	2046	7375	3	85766	FALSE	11	شباب بدون مسخرة وضحك عليهن قادة قسد باعتنا أمريكا انا شمتااااان بقسد كلاب الاسد الثورة السورية العظيية	106	{'😅': 'grinning face with sweat'}	{'😅': 1}	1	1	[]	0
1695751396551717050	FALSE	4	10	51	4	0	16167	544372344	ar	['محمد صلاح', 'ليفربول', 'صلاح']	['Person', 'Organization', 'Person']	[]	[]	['https://twitter.com/Silvr_EPL/status/1695751396551717050/video/1']	[]	[]	['TV Shows', 'Sports Event', 'Sport', 'Sports League', 'Sports League', 'Events [Entity Service]', 'Soccer Match', 'Business Taxonomy', 'Unified Twitter Taxonomy', 'Unified Twitter Taxonomy', 'Unified Twitter Taxonomy', 'Unified Twitter Taxonomy', 'Person', 'Sport', 'Sports Team', 'Athlete', 'Unified Twitter Taxonomy', 'Unified Twitter Taxonomy', 'Unified Twitter Taxonomy', 'Unified Twitter Taxon…	['Television shows from around the world', '', 'Types of sports, like soccer and basketball', '', '', 'Real world events. ', 'Sports Event specific to Soccer matches', 'Categories within Brand Verticals that narrow down the scope of Brands', 'A taxonomy of user interests. ', 'A taxonomy of user interests. ', 'A taxonomy of user interests. ', 'A taxonomy of user interests. ', 'Named people in the …	['Premier League', 'Newcastle United vs Liverpool FC', 'Soccer', 'England - Soccer', 'Premier League', 'Newcastle United vs Liverpool FC', 'Newcastle United vs Liverpool FC', 'Sports & Fitness Business', 'Premier League', 'Soccer', 'Sports', 'News', 'Mohamed Salah', 'Soccer', 'Liverpool FC', 'Mohamed Salah', 'Liverpool FC', 'Soccer', 'Mohamed Salah', 'Sports', 'Premier League']	['', '', '', '', '', '', '', 'Brands, companies, advertisers and every non-person handle with the profit intent related to sports nutrition, athletic apparel, sports apps, fitness venues', '', '', 'Sports', 'News', '', '', '', '', '', '', '', 'Sports', '']	TRUE	[]	2023-08-27 10:53:33	TRUE	🎥 محمد صلاح ينشر فديو عبر حسابه في التيك توك مُعلقاً فيه حول أخبار رحيله عن ليفربول : " صلاح باقي " https://t.co/FVUGr1P6Qi	everyone	1	2012-04-03 13:54:04	هنا أخبار #الدوري_الانجليزي أول بـ أول و نقل المباريات وأهم الاحداث و الاحصائيات. تابعنا فقط سنضعك في قلب الحدث . للأعلانات التواصل عبر @3bdullah_Ghali	[]	['الدوري_الانجليزي']	[]	Saudi Arabia	FALSE	574018	264	114934	1140	141	FALSE	32	محمد صلاح ينشر فديو عبر حسابه في التيك توك مُعلقاً فيه حول أخبار رحيله عن ليفربول : صلاح باقي	99	{'🎥': 'movie camera'}	{'🎥': 1}	1	3	['ليفربول']	1
1696499456328294632	FALSE	74	14	205	3	1	7036	1071865647569780992	ar	[]	[]	['عيدروس_الزبيدي', 'حد_يافع']	[]	['https://twitter.com/sadamplpheth/status/1696499456328294632/video/1']	[]	[]	[]	[]	[]	[]	TRUE	[]	2023-08-29 12:26:04	TRUE	الرئيس القائد المارشال #عيدروس_الزبيدي يقوم بزيارة إلى جبهة الموت #حد_يافع للإطلاع على أوضاع الجبهة وتقديم الدعم اللازم للمرابطين🫡 حفظك الله زعيمنا وحفظ قواتنا الجنوبية واليافعي رطل والزيدي وقية✌️ https://t.co/atQZr01xKn	everyone	1	2018-12-09 20:34:19	#ثائر ✌🏻 ،، الإحترام والأدب ثم للنقاش بقية #شبوه حسابي على الفيس بك https://t.co/xrKISq969x	['https://www.facebook.com/sadam.plpheth']	['ثائر', 'شبوه']	[]	في طور التنفيذ (الجنوب العربي)	FALSE	11447	1847	32708	7	35006	FALSE	25	الرئيس القائد المارشال عيدروس الزبيدي يقوم بزيارة إلى جبهة الموت حد يافع للإطلاع على أوضاع الجبهة وتقديم الدعم اللازم للمرابطين حفظك الله زعيمنا وحفظ قواتنا الجنوبية واليافعي رطل والزيدي وقية	195	{'✌️': 'victory hand'}	{'✌️': 1}	1	0	[]	0
1696098290637373649	FALSE	0	1	0	0	0	45	1088779606444989952	ar	[]	[]	[]	[]	['https://twitter.com/OuldYahdih/status/1696098290637373649/photo/1']	[]	[]	[]	[]	[]	[]	TRUE	[]	2023-08-28 09:51:59	TRUE	الشروع في تشغيل محطة تحلية مياه البحر بآسفي 🇲🇦 https://t.co/J1CPHM5UbT	everyone	1	2019-01-25 12:44:21	Interested in moroccan social media, politic, economic and sports. Member of the Moroccan Institut for Strategic Studies.	['https://www.facebook.com/sadam.plpheth']	['ثائر', 'شبوه']	[]	Laâyoune-Boujdour-SakiaElHamra	FALSE	871	1449	1340	0	1351	FALSE	26	الشروع في تشغيل محطة تحلية مياه البحر بآسفي	45	{'🇲🇦': 'flag: Morocco'}	{'🇲🇦': 1}	1	0	[]	0
1696257337244225609	FALSE	21	132	295	7	2	120547	1594315508337319936	ar	['نجلاء المنقوش']	['Person']	[]	[]	['https://twitter.com/Hassan748552822/status/1696257337244225609/photo/1']	[]	[]	[]	[]	[]	[]	TRUE	[]	2023-08-28 20:23:58	TRUE	نجلاء المنقوش وصلت لبريطانيا وفتحت صفحة جديدة. https://t.co/VdhzXW21T2	everyone	1	2022-11-20 13:04:12	خريج الكليه الفنيه العسكريه ⁦ بكالوريوس الهندسه الالكترونيه ⁦ ⁩بكالوريـوس علوم عسكرية a graduate college military BA Military engineering , a colonel رتبة/عقيد	['https://www.facebook.com/sadam.plpheth']	['ثائر', 'شبوه']	[]	افريقيا	FALSE	1732	973	10749	0	84503	FALSE	27	نجلاء المنقوش وصلت لبريطانيا وفتحت صفحة جديدة.	47	{}	{}	0	1	[]	0
1695770477933809935	FALSE	33	18	193	8	1	12435	1637133116379734016	ar	[]	[]	['السويداء']	[]	['https://twitter.com/fadi_aboughanem/status/1695770477933809935/video/1']	[]	[]	[]	[]	[]	[]	TRUE	[]	2023-08-27 12:09:22	TRUE	هدير أصوات الأحرار تصدح للتحرر من الطغمة الحاكمة. #السويداء البطلة. https://t.co/wbyxguVTGi	everyone	1	2023-03-18 16:47:58		['https://www.facebook.com/sadam.plpheth']	['ثائر', 'شبوه']	[]		FALSE	1754	3622	1615	0	2805	FALSE	28	هدير أصوات الأحرار تصدح للتحرر من الطغمة الحاكمة. السويداء البطلة.	67	{}	{}	0	0	[]	0
1695830460671082768	FALSE	88	710	984	123	12	270048	884177244	ar	['ليبيا', 'إسرائيل']	['Place', 'Place']	[]	[]	['https://twitter.com/EdyCohen/status/1695830460671082768/photo/1']	[]	[]	[]	[]	[]	[]	TRUE	[]	2023-08-27 16:07:43	TRUE	عاجل ليبيا تطبع مع إسرائيل https://t.co/XCbfL4VQE7	everyone	1	2012-10-16 10:40:28	صحفي إسرائيلي من يهود لبنان وباحث أكاديمي עיתונאי, דר ויועץ לענייני ערבים Journalist, Ph.D & Expert on Arab Affairs	['https://www.facebook.com/sadam.plpheth']	['ثائر', 'شبوه']	[]	ישראל	FALSE	664095	1750	69819	1089	4806	FALSE	30	عاجل ليبيا تطبع مع إسرائيل	27	{}	{}	0	2	[]	0
1678449940215865351	FALSE	8	99	65	7	5	56483	884177244	ar	[]	[]	[]	[]	['https://twitter.com/Basman76734641/status/1678445301265309711']	[]	[]	[]	[]	[]	[]	TRUE	[]	2023-07-10 17:03:44	TRUE	مبروك للقضية وللأمة العربية والإسلامية https://t.co/1k87UeTzS3	everyone	1	2012-10-16 10:40:28	صحفي إسرائيلي من يهود لبنان وباحث أكاديمي עיתונאי, דר ויועץ לענייני ערבים Journalist, Ph.D & Expert on Arab Affairs	['https://www.facebook.com/sadam.plpheth']	['ثائر', 'شبوه']	[]	ישראל	FALSE	664095	1750	69819	1089	4806	FALSE	136	مبروك للقضية وللأمة العربية والإسلامية	39	{}	{}	0	0	[]	0
1574306744901271552	FALSE	59	170	608	25	3	0	884177244	zxx	[]	[]	[]	[]	['https://twitter.com/EdyCohen/status/1574306744901271552/photo/1']	[]	[]	[]	[]	[]	[]	TRUE	[]	2022-09-26 07:55:51	TRUE	https://t.co/Pps3lQzu56	everyone	1	2012-10-16 10:40:28	صحفي إسرائيلي من يهود لبنان وباحث أكاديمي עיתונאי, דר ויועץ לענייני ערבים Journalist, Ph.D & Expert on Arab Affairs	['https://www.facebook.com/sadam.plpheth']	['ثائر', 'شبوه']	[]	ישראל	FALSE	664095	1750	69819	1089	4806	FALSE	780		0	{}	{}	0	0	[]	0
1572229979953299456	FALSE	57	335	676	23	6	0	884177244	ar	['الجزائر', 'عبد القادر']	['Place', 'Person']	[]	[]	['https://twitter.com/EdyCohen/status/1572229979953299456/photo/1']	[]	[]	[]	[]	[]	[]	TRUE	[]	2022-09-20 14:23:32	TRUE	مجموعة من حثالات الجزائر يزورون دمشق و يقدمون له هدية صورته مع عبد القادر الجزائري. https://t.co/lIZgAP50G4	everyone	1	2012-10-16 10:40:28	صحفي إسرائيلي من يهود لبنان وباحث أكاديمي עיתונאי, דר ויועץ לענייני ערבים Journalist, Ph.D & Expert on Arab Affairs	['https://www.facebook.com/sadam.plpheth']	['ثائر', 'شبوه']	[]	ישראל	FALSE	664095	1750	69819	1089	4806	FALSE	808	مجموعة من حثالات الجزائر يزورون دمشق و يقدمون له هدية صورته مع عبد القادر الجزائري.	84	{}	{}	0	2	[]	0
1565700172444798976	FALSE	13	59	113	3	2	0	884177244	ar	[]	[]	[]	[]	['https://twitter.com/HamedMusher/status/1565676773119082497']	[]	[]	[]	[]	[]	[]	TRUE	[]	2022-09-02 13:56:25	TRUE	من قام بهذا العمل؟ دولة عربية هههه https://t.co/fTApsP46i2	everyone	1	2012-10-16 10:40:28	صحفي إسرائيلي من يهود لبنان وباحث أكاديمي עיתונאי, דר ויועץ לענייני ערבים Journalist, Ph.D & Expert on Arab Affairs	['https://www.facebook.com/sadam.plpheth']	['ثائر', 'شبوه']	[]	ישראל	FALSE	664095	1750	69819	1089	4806	FALSE	853	من قام بهذا العمل؟ دولة عربية هههه	35	{}	{}	0	0	[]	0
1556011097282461696	FALSE	8	72	78	2	2	0	884177244	ar	[]	[]	[]	[]	['https://twitter.com/noamamir74/status/1556000301559255040']	[]	[]	[]	[]	[]	[]	TRUE	[]	2022-08-06 20:15:29	TRUE	عاجل فيديو عن الصاروخ الذي فشل وسقط على الفلسطينيين. صاروخ تابع للجهاد الاسلامي https://t.co/MlPAE0nybl	everyone	1	2012-10-16 10:40:28	صحفي إسرائيلي من يهود لبنان وباحث أكاديمي עיתונאי, דר ויועץ לענייני ערבים Journalist, Ph.D & Expert on Arab Affairs	['https://www.facebook.com/sadam.plpheth']	['ثائر', 'شبوه']	[]	ישראל	FALSE	664095	1750	69819	1089	4806	FALSE	883	عاجل فيديو عن الصاروخ الذي فشل وسقط على الفلسطينيين. صاروخ تابع للجهاد الاسلامي	80	{}	{}	0	0	[]	0
1695762477366095976	FALSE	0	0	2	0	0	812	1672354617080922112	ar	['صلاح']	['Person']	['محمد_صلاح']	[]	['https://twitter.com/mohamed_74i/status/1695762477366095976/video/1']	[]	[]	['Business Taxonomy', 'Unified Twitter Taxonomy', 'Technology', 'Person', 'Athlete', 'Unified Twitter Taxonomy', 'Unified Twitter Taxonomy', 'Unified Twitter Taxonomy']	['Categories within Brand Verticals that narrow down the scope of Brands', 'A taxonomy of user interests. ', 'for individual and types of technology, e.g., food technology, 3D printing', 'Named people in the world like Nelson Mandela', 'An athlete in the world, like Serena Williams or Lionel Messi', 'A taxonomy of user interests. ', 'A taxonomy of user interests. ', 'A taxonomy of user interests.…	['Sports & Fitness Business', 'Social media', 'Social media', 'Mohamed Salah', 'Mohamed Salah', 'Soccer', 'Mohamed Salah', 'Sports']	['Brands, companies, advertisers and every non-person handle with the profit intent related to sports nutrition, athletic apparel, sports apps, fitness venues', '', '', '', '', '', '', 'Sports']	TRUE	[]	2023-08-27 11:37:35	TRUE	صلاح علي تيك توك 😂💗 لا تعشم نفسك يا كبسه .. ركز على الاسم كويس 😏#محمد_صلاح https://t.co/73mXk32HjQ	everyone	1	2023-06-23 21:23:42	كوّير فشخ 🇪🇬 | 🇵🇸	['https://www.facebook.com/sadam.plpheth']	['ثائر', 'شبوه']	[]	Cairo, Egypt	FALSE	260	654	116	0	143	FALSE	32	صلاح علي تيك توك لا تعشم نفسك يا كبسه .. ركز على الاسم كويس محمد صلاح	71	{'😏': 'smirking face', '😂': 'face with tears of joy', '💗': 'growing heart'}	{'😏': 1, '😂': 1, '💗': 1}	3	1	[]	0
1695562752394220008	FALSE	170	1840	4903	1448	807	3492022	1075449928539927040	ar	[]	[]	[]	[]	['https://twitter.com/gorgeous4ew/status/1695562752394220008/photo/1']	[]	[]	['Business Taxonomy']	['Categories within Brand Verticals that narrow down the scope of Brands']	['Food & Beverage Business']	['Brands, companies, advertisers and every non-person handle with the profit intent and related to foods & beverages such as snacks, soft drinks, beers.']	TRUE	[]	2023-08-26 22:23:56	TRUE	شركة ليز تعلن عن شيبس جديد بنكهه الماتشا😳💚!! https://t.co/UW1Y6xZ92I	everyone	1	2018-12-19 17:56:58	مصدرك الأول لأهم الأخبار الترفيهية والمنوّعة، والمقاطع الشائعة 🔥 للإعلانات👇🏻:	[]	[]	[]		FALSE	2447096	365	55725	1299	4207	FALSE	31	شركة ليز تعلن عن شيبس جديد بنكهه الماتشا	41	{'💚': 'green heart', '😳': 'flushed face'}	{'💚': 1, '😳': 1}	2	0	[]	0
1678856083329171458	FALSE	218	82	1424	16	91	493348	1075449928539927040	ar	['عواد البلوي', 'أمريكا بايدن']	['Person', 'Place']	[]	[]	['https://twitter.com/gorgeous4ew/status/1678856083329171458/video/1']	[]	[]	[]	[]	[]	[]	TRUE	[]	2023-07-11 19:57:36	TRUE	مقطع يشعرك بالفخر: حفل تخرج الدكتور عواد البلوي وقراءته بما تيسر من القرآن بحضور رئيس أمريكا بايدن❤️🇸🇦. https://t.co/o84JVtgFng	everyone	1	2018-12-19 17:56:58	مصدرك الأول لأهم الأخبار الترفيهية والمنوّعة، والمقاطع الشائعة 🔥 للإعلانات👇🏻:	[]	[]	[]		FALSE	2447096	365	55725	1299	4207	FALSE	134	مقطع يشعرك بالفخر: حفل تخرج الدكتور عواد البلوي وقراءته بما تيسر من القرآن بحضور رئيس أمريكا بايدن.	101	{'❤️': 'red heart', '🇸🇦': 'flag: Saudi Arabia'}	{'❤️': 1, '🇸🇦': 1}	2	2	[]	0
1677036676399415301	FALSE	1192	752	19890	654	1151	3790619	1075449928539927040	ar	[]	[]	[]	[]	['https://twitter.com/gorgeous4ew/status/1677036676399415301/photo/1', 'https://twitter.com/gorgeous4ew/status/1677036676399415301/photo/1', 'https://twitter.com/gorgeous4ew/status/1677036676399415301/photo/1', 'https://twitter.com/gorgeous4ew/status/1677036676399415301/photo/1']	[]	[]	['Business Taxonomy', 'Unified Twitter Taxonomy', 'Unified Twitter Taxonomy']	['Categories within Brand Verticals that narrow down the scope of Brands', 'A taxonomy of user interests. ', 'A taxonomy of user interests. ']	['Sports & Fitness Business', 'Sports', 'Tennis']	['Brands, companies, advertisers and every non-person handle with the profit intent related to sports nutrition, athletic apparel, sports apps, fitness venues', 'Sports', 'Tennis']	TRUE	[]	2023-07-06 19:27:56	TRUE	ملاعب التنس في العُلا 🇸🇦❤️. https://t.co/M0iDs6hBDJ	everyone	1	2018-12-19 17:56:58	مصدرك الأول لأهم الأخبار الترفيهية والمنوّعة، والمقاطع الشائعة 🔥 للإعلانات👇🏻:	[]	[]	[]		FALSE	2447096	365	55725	1299	4207	FALSE	132	ملاعب التنس في العُلا .	24	{'❤️': 'red heart', '🇸🇦': 'flag: Saudi Arabia'}	{'❤️': 1, '🇸🇦': 1}	2	0	[]	0
1675111924437069824	FALSE	83	253	624	54	70	508255	1075449928539927040	ar	['مصر']	['Place']	[]	[]	['https://twitter.com/metropolmedya_/status/1674772264695242752/video/1']	[]	[]	[]	[]	[]	[]	TRUE	[]	2023-07-01 11:59:39	TRUE	سمك قرش يسبح تحت قارب أحد السياح في مصر🤯!https://t.co/PGOtBKGI6H	everyone	1	2018-12-19 17:56:58	مصدرك الأول لأهم الأخبار الترفيهية والمنوّعة، والمقاطع الشائعة 🔥 للإعلانات👇🏻:	[]	[]	[]		FALSE	2447096	365	55725	1299	4207	FALSE	158	سمك قرش يسبح تحت قارب أحد السياح في مصر	39	{'🤯': 'exploding head'}	{'🤯': 1}	1	1	[]	0
1690445799878959104	FALSE	33	63	445	30	15	125922	1075449928539927040	ar	['محمد صلاح', 'صلاح', 'افريقيا']	['Person', 'Person', 'Place']	[]	[]	['https://twitter.com/OLYAN15K/status/1690440154094108673/video/1']	[]	[]	['Person', 'Business Taxonomy', 'Athlete', 'Unified Twitter Taxonomy', 'Unified Twitter Taxonomy', 'Unified Twitter Taxonomy', 'Person', 'Athlete', 'Unified Twitter Taxonomy', 'Unified Twitter Taxonomy', 'Unified Twitter Taxonomy']	['Named people in the world like Nelson Mandela', 'Categories within Brand Verticals that narrow down the scope of Brands', 'An athlete in the world, like Serena Williams or Lionel Messi', 'A taxonomy of user interests. ', 'A taxonomy of user interests. ', 'A taxonomy of user interests. ', 'Named people in the world like Nelson Mandela', 'An athlete in the world, like Serena Williams or Lionel Me…	['Sadio Mane', 'Sports & Fitness Business', 'Sadio Mane', 'Soccer', 'Sadio Mane', 'Sports', 'Mohamed Salah', 'Mohamed Salah', 'Soccer', 'Mohamed Salah', 'Sports']	['', 'Brands, companies, advertisers and every non-person handle with the profit intent related to sports nutrition, athletic apparel, sports apps, fitness venues', '', '', '', 'Sports', '', '', '', '', 'Sports']	TRUE	[]	2023-08-12 19:31:00	TRUE	ساديو ماني يرد على شخص سأله عن محمد صلاح: صلاح لا يمتلك كأس أفريقيا، والسنغال تملك افريقيا https://t.co/ajk3OOpw5p	everyone	0	2018-12-19 17:56:58	مصدرك الأول لأهم الأخبار الترفيهية والمنوّعة، والمقاطع الشائعة 🔥 للإعلانات👇🏻:	[]	[]	[]		FALSE	2447096	365	55725	1299	4207	FALSE	75	ساديو ماني يرد على شخص سأله عن محمد صلاح: صلاح لا يمتلك كأس أفريقيا، والسنغال تملك افريقيا	92	{}	{}	0	3	[]	0
1690489593580105728	FALSE	52	40	536	3	3	75363	1075449928539927040	ar	['النصر']	['Organization']	[]	[]	['https://twitter.com/gorgeous4ew/status/1690489593580105728/photo/1']	[]	[]	['Person', 'Business Taxonomy', 'Athlete', 'Unified Twitter Taxonomy', 'Unified Twitter Taxonomy', 'Unified Twitter Taxonomy']	['Named people in the world like Nelson Mandela', 'Categories within Brand Verticals that narrow down the scope of Brands', 'An athlete in the world, like Serena Williams or Lionel Messi', 'A taxonomy of user interests. ', 'A taxonomy of user interests. ', 'A taxonomy of user interests. ']	['Sadio Mane', 'Sports & Fitness Business', 'Sadio Mane', 'Soccer', 'Sadio Mane', 'Sports']	['', 'Brands, companies, advertisers and every non-person handle with the profit intent related to sports nutrition, athletic apparel, sports apps, fitness venues', '', '', '', 'Sports']	TRUE	[]	2023-08-12 22:25:01	TRUE	ساديو ماني في أحدث ظهور بعد فوز النصر💛 https://t.co/6MzsNJRhAZ	everyone	0	2018-12-19 17:56:58	مصدرك الأول لأهم الأخبار الترفيهية والمنوّعة، والمقاطع الشائعة 🔥 للإعلانات👇🏻:	[]	[]	[]		FALSE	2447096	365	55725	1299	4207	FALSE	75	ساديو ماني في أحدث ظهور بعد فوز النصر	38	{'💛': 'yellow heart'}	{'💛': 1}	1	1	['النصر']	1
1660037092099907586	FALSE	81	262	1247	35	269	1803971	1075449928539927040	ar	['عادل إمام']	['Person']	[]	[]	['https://twitter.com/maka85244532/status/1659983337765629952/video/1']	[]	[]	['Person', 'Business Taxonomy', 'Actor', 'Unified Twitter Taxonomy', 'Unified Twitter Taxonomy']	['Named people in the world like Nelson Mandela', 'Categories within Brand Verticals that narrow down the scope of Brands', 'An actor or actress in the world, like Kate Winslet or Leonardo DiCaprio', 'A taxonomy of user interests. ', 'A taxonomy of user interests. ']	['Adel Imam', 'Food & Beverage Business', 'Adel Imam', 'Adel Imam', 'Egyptian actors']	['', 'Brands, companies, advertisers and every non-person handle with the profit intent and related to foods & beverages such as snacks, soft drinks, beers.', '', '', '']	TRUE	[]	2023-05-20 21:37:39	TRUE	أول ظهور للزعيم عادل إمام بعد غياب سنوات طويلة❤️.https://t.co/uHZBQMOHg4	everyone	1	2018-12-19 17:56:58	مصدرك الأول لأهم الأخبار الترفيهية والمنوّعة، والمقاطع الشائعة 🔥 للإعلانات👇🏻:	[]	[]	[]		FALSE	2447096	365	55725	1299	4207	FALSE	285	أول ظهور للزعيم عادل إمام بعد غياب سنوات طويلة.	47	{'❤️': 'red heart'}	{'❤️': 1}	1	1	[]	0
1660380052448591872	FALSE	60	58	751	27	17	315890	1075449928539927040	ar	['ريانة برناوي']	['Person']	[]	[]	['https://twitter.com/gorgeous4ew/status/1660380052448591872/photo/1']	[]	[]	[]	[]	[]	[]	TRUE	[]	2023-05-21 20:20:27	TRUE	ريانة برناوي تحصد تفاعلا واسعا من الإعلام الغربي لكونها أول امرأة عربية تصعد إلى الفضاء 👏🇸🇦. https://t.co/C0Fe6IetGN	everyone	1	2018-12-19 17:56:58	مصدرك الأول لأهم الأخبار الترفيهية والمنوّعة، والمقاطع الشائعة 🔥 للإعلانات👇🏻:	[]	[]	[]		FALSE	2447096	365	55725	1299	4207	FALSE	287	ريانة برناوي تحصد تفاعلا واسعا من الإعلام الغربي لكونها أول امرأة عربية تصعد إلى الفضاء .	90	{'👏': 'clapping hands', '🇸🇦': 'flag: Saudi Arabia'}	{'👏': 1, '🇸🇦': 1}	2	1	[]	0
1659562268869230593	FALSE	20	18	214	6	3	126019	1075449928539927040	ar	['جدة']	['Place']	[]	[]	['https://twitter.com/gorgeous4ew/status/1659562268869230593/photo/1']	[]	[]	[]	[]	[]	[]	TRUE	[]	2023-05-19 14:10:52	TRUE	الصورة التذكارية لسمو ولي العهد والقادة ورؤساء الوفود المشاركين في القمة العربية في جدة 🇸🇦. https://t.co/AxHV11zTZD	everyone	0	2018-12-19 17:56:58	مصدرك الأول لأهم الأخبار الترفيهية والمنوّعة، والمقاطع الشائعة 🔥 للإعلانات👇🏻:	[]	[]	[]		FALSE	2447096	365	55725	1299	4207	FALSE	294	الصورة التذكارية لسمو ولي العهد والقادة ورؤساء الوفود المشاركين في القمة العربية في جدة .	90	{'🇸🇦': 'flag: Saudi Arabia'}	{'🇸🇦': 1}	1	1	[]	0
1655815323071700994	FALSE	55	219	878	153	173	1372462	1075449928539927040	ar	['صربيا']	['Place']	[]	[]	['https://twitter.com/x8ic2/status/1655679929000787968/video/1']	[]	[]	[]	[]	[]	[]	TRUE	[]	2023-05-09 06:01:51	TRUE	في صربيا طفل يقـ-تل 8 طلاب بعد تنمرهم عليه. https://t.co/Wgd5ghWWss	everyone	1	2018-12-19 17:56:58	مصدرك الأول لأهم الأخبار الترفيهية والمنوّعة، والمقاطع الشائعة 🔥 للإعلانات👇🏻:	[]	[]	[]		FALSE	2447096	365	55725	1299	4207	FALSE	301	في صربيا طفل يقـتل 8 طلاب بعد تنمرهم عليه.	45	{}	{}	0	1	[]	0
1654488158082301956	FALSE	623	2953	7181	1925	744	7054839	1075449928539927040	ar	[]	[]	[]	[]	['https://twitter.com/gorgeous4ew/status/1654488158082301956/photo/1']	[]	[]	['Ongoing News Story', 'Unified Twitter Taxonomy']	["Ongoing News Stories like 'Brexit'", 'A taxonomy of user interests. ']	['COVID-19', 'COVID-19']	['', '']	TRUE	[]	2023-05-05 14:08:10	TRUE	عاجل ورسميًا: انتهاء جائحة كورونا حول العالم. -ما أكثر شيء ستتذكره 👀؟ https://t.co/smvVMTyZNQ	everyone	1	2018-12-19 17:56:58	مصدرك الأول لأهم الأخبار الترفيهية والمنوّعة، والمقاطع الشائعة 🔥 للإعلانات👇🏻:	[]	[]	[]		FALSE	2447096	365	55725	1299	4207	FALSE	321	عاجل ورسميًا: انتهاء جائحة كورونا حول العالم. ما أكثر شيء ستتذكره ؟	70	{'👀': 'eyes'}	{'👀': 1}	1	0	[]	0
1610316276865597440	FALSE	37	55	409	20	13	153716	1075449928539927040	ar	['كريستيانو رونالدو']	['Person']	[]	[]	['https://twitter.com/gorgeous4ew/status/1610316276865597440/photo/1']	[]	[]	['Person', 'Business Taxonomy', 'Athlete', 'Unified Twitter Taxonomy', 'Unified Twitter Taxonomy', 'Unified Twitter Taxonomy']	['Named people in the world like Nelson Mandela', 'Categories within Brand Verticals that narrow down the scope of Brands', 'An athlete in the world, like Serena Williams or Lionel Messi', 'A taxonomy of user interests. ', 'A taxonomy of user interests. ', 'A taxonomy of user interests. ']	['Cristiano Ronaldo', 'Sports & Fitness Business', 'Cristiano Ronaldo', 'Soccer', 'Cristiano Ronaldo', 'Sports']	['', 'Brands, companies, advertisers and every non-person handle with the profit intent related to sports nutrition, athletic apparel, sports apps, fitness venues', '', '', '', 'Sports']	TRUE	[]	2023-01-03 16:44:53	TRUE	كريستيانو رونالدو: الدوري السعودي دوري تنافسي للغاية، والناس لا يعرفون ذلك جيدًا. https://t.co/45lFOxdxcz	everyone	0	2018-12-19 17:56:58	مصدرك الأول لأهم الأخبار الترفيهية والمنوّعة، والمقاطع الشائعة 🔥 للإعلانات👇🏻:	[]	[]	[]		FALSE	2447096	365	55725	1299	4207	FALSE	587	كريستيانو رونالدو: الدوري السعودي دوري تنافسي للغاية، والناس لا يعرفون ذلك جيدًا.	84	{}	{}	0	1	[]	0
1593270111200223232	FALSE	97	180	916	64	56	0	1075449928539927040	ar	['ليونيل ميسي', 'قطر']	['Person', 'Place']	[]	[]	['https://twitter.com/gorgeous4ew/status/1593270111200223232/video/1']	[]	[]	['Person', 'Business Taxonomy', 'Athlete', 'Unified Twitter Taxonomy', 'Unified Twitter Taxonomy', 'Unified Twitter Taxonomy']	['Named people in the world like Nelson Mandela', 'Categories within Brand Verticals that narrow down the scope of Brands', 'An athlete in the world, like Serena Williams or Lionel Messi', 'A taxonomy of user interests. ', 'A taxonomy of user interests. ', 'A taxonomy of user interests. ']	['Lionel Messi', 'Sports & Fitness Business', 'Lionel Messi', 'Soccer', 'Lionel Messi', 'Sports']	['', 'Brands, companies, advertisers and every non-person handle with the profit intent related to sports nutrition, athletic apparel, sports apps, fitness venues', '', '', '', 'Sports']	TRUE	[]	2022-11-17 15:49:30	TRUE	ليونيل ميسي يصل إلى قطر لخوض المونديال. https://t.co/waJA1cMasl	everyone	0	2018-12-19 17:56:58	مصدرك الأول لأهم الأخبار الترفيهية والمنوّعة، والمقاطع الشائعة 🔥 للإعلانات👇🏻:	[]	[]	[]		FALSE	2447096	365	55725	1299	4207	FALSE	655	ليونيل ميسي يصل إلى قطر لخوض المونديال.	40	{}	{}	0	2	[]	0
1592500645277245440	FALSE	109	121	922	22	14	0	1075449928539927040	ar	[]	[]	[]	[]	['https://twitter.com/gorgeous4ew/status/1592500645277245440/photo/1', 'https://twitter.com/gorgeous4ew/status/1592500645277245440/photo/1', 'https://twitter.com/gorgeous4ew/status/1592500645277245440/photo/1']	[]	[]	['Sports Event', 'Sport', 'Sports Team', 'Sports League', 'Sports League', 'Events [Entity Service]', 'Soccer Match', 'Business Taxonomy', 'Unified Twitter Taxonomy', 'Unified Twitter Taxonomy', 'Unified Twitter Taxonomy', 'Unified Twitter Taxonomy']	['', 'Types of sports, like soccer and basketball', 'A sports team organization, like Arsenal and the Boston Celtics', '', '', 'Real world events. ', 'Sports Event specific to Soccer matches', 'Categories within Brand Verticals that narrow down the scope of Brands', 'A taxonomy of user interests. ', 'A taxonomy of user interests. ', 'A taxonomy of user interests. ', 'A taxonomy of user interests.…	['Saudi Arabia vs Croatia', 'Soccer', 'Saudi Arabia', 'International - Soccer', 'Int. Friendly Games', 'Saudi Arabia vs Croatia', 'Saudi Arabia vs Croatia', 'Sports & Fitness Business', 'Saudi Arabia', 'Soccer', 'Sports', "Men's national soccer teams"]	['', '', '', '', '', '', '', 'Brands, companies, advertisers and every non-person handle with the profit intent related to sports nutrition, athletic apparel, sports apps, fitness venues', '', '', 'Sports', 'National Soccer Teams']	TRUE	[]	2022-11-15 12:51:55	TRUE	طائرة المنتخب السعودي الخاصة بكأس العالم 💚🇸🇦 https://t.co/fTGC9aSsI9	everyone	1	2018-12-19 17:56:58	مصدرك الأول لأهم الأخبار الترفيهية والمنوّعة، والمقاطع الشائعة 🔥 للإعلانات👇🏻:	[]	[]	[]		FALSE	2447096	365	55725	1299	4207	FALSE	659	طائرة المنتخب السعودي الخاصة بكأس العالم	42	{'💚': 'green heart', '🇸🇦': 'flag: Saudi Arabia'}	{'💚': 1, '🇸🇦': 1}	2	0	[]	0
1571024835991736320	FALSE	623	164	4476	95	543	0	1075449928539927040	ar	[]	[]	[]	[]	['https://twitter.com/gorgeous4ew/status/1571024835991736320/video/1']	[]	[]	[]	[]	[]	[]	TRUE	[]	2022-09-17 06:34:43	TRUE	تقنية الهولوجرام تصل إلى مستوى رهيب جدًا 🤯! https://t.co/gaZODm41wQ	everyone	1	2018-12-19 17:56:58	مصدرك الأول لأهم الأخبار الترفيهية والمنوّعة، والمقاطع الشائعة 🔥 للإعلانات👇🏻:	[]	[]	[]		FALSE	2447096	365	55725	1299	4207	FALSE	814	تقنية الهولوجرام تصل إلى مستوى رهيب جدًا	42	{'🤯': 'exploding head'}	{'🤯': 1}	1	0	[]	0
1570133001794908162	FALSE	296	2355	2984	1813	464	0	1075449928539927040	ar	[]	[]	[]	[]	['https://twitter.com/MSDAR_NEWS/status/1570106566401224705/video/1']	[]	[]	['Business Taxonomy']	['Categories within Brand Verticals that narrow down the scope of Brands']	['Food & Beverage Business']	['Brands, companies, advertisers and every non-person handle with the profit intent and related to foods & beverages such as snacks, soft drinks, beers.']	TRUE	[]	2022-09-14 19:30:53	TRUE	نباتيون يضعون الورود على قطع اللحم حداداً على أرواح الحيوانات😅! https://t.co/ZAwaVr8NVu	everyone	1	2018-12-19 17:56:58	مصدرك الأول لأهم الأخبار الترفيهية والمنوّعة، والمقاطع الشائعة 🔥 للإعلانات👇🏻:	[]	[]	[]		FALSE	2447096	365	55725	1299	4207	FALSE	831	نباتيون يضعون الورود على قطع اللحم حداداً على أرواح الحيوانات	62	{'😅': 'grinning face with sweat'}	{'😅': 1}	1	0	[]	0
1562415612466446336	FALSE	131	982	2302	693	147	0	1075449928539927040	ar	[]	[]	[]	[]	['https://twitter.com/gorgeous4ew/status/1562415612466446336/photo/1', 'https://twitter.com/gorgeous4ew/status/1562415612466446336/photo/1']	[]	[]	[]	[]	[]	[]	TRUE	[]	2022-08-24 12:24:44	TRUE	كيم نامجون بالمرتبة الأولى بترتيب أكثر الرجال وسامة وهنري كافيل بالمرتبة الثانية لعام 2022! -Tc Candler https://t.co/nOhuKTkAjR	everyone	1	2018-12-19 17:56:58	مصدرك الأول لأهم الأخبار الترفيهية والمنوّعة، والمقاطع الشائعة 🔥 للإعلانات👇🏻:	[]	[]	[]		FALSE	2447096	365	55725	1299	4207	FALSE	866	كيم نامجون بالمرتبة الأولى بترتيب أكثر الرجال وسامة وهنري كافيل بالمرتبة الثانية لعام 2022	94	{}	{}	0	0	[]	0
1695502735087386719	TRUE	1	0	2	0	0	50	303643932	ar	['ليبيا']	['Place']	[]	[]	['https://twitter.com/ibrahiemmstafa/status/1695502735087386719/video/1']	[]	[]	[]	[]	[]	[]	TRUE	[]	2023-08-26 18:25:27	TRUE	الجيش السودانى يدمر إمدادات للدعم السريع قادمة من ليبيا https://t.co/tAqnaUPjNK	everyone	1	2011-05-23 07:09:04	منشئ محتوى رقمى	[]	[]	[]	مصر	FALSE	2829	1705	13872	9	1878	FALSE	33	الجيش السودانى يدمر إمدادات للدعم السريع قادمة من ليبيا	56	{}	{}	0	1	[]	0
1695731917465759785	FALSE	0	4	15	1	1	10800	406535572	ar	[]	[]	['محمد_صلاح_اتحادي']	[]	['https://twitter.com/nassercom880/status/1695731917465759785/video/1']	[]	[]	['Unified Twitter Taxonomy', 'Technology']	['A taxonomy of user interests. ', 'for individual and types of technology, e.g., food technology, 3D printing']	['Social media', 'Social media']	['', '']	TRUE	[]	2023-08-27 09:36:08	FALSE	#محمد_صلاح_اتحادي اللاعب البارح في حسابه الرسمي في تيك توك نشر مقطع يقول فيه : صلاح باقي . انتهى https://t.co/zzDpfv6DSs	everyone	1	2011-11-06 20:58:39		[]	[]	[]	Riyadh	FALSE	722	1638	18373	1	24537	FALSE	32	محمد صلاح اتحادي اللاعب البارح في حسابه الرسمي في تيك توك نشر مقطع يقول فيه : صلاح باقي . انتهى	96	{}	{}	0	0	[]	0
1695415669133627612	FALSE	6	16	56	1	2	5374	1128227434703261952	ar	['ليبيا']	['Place']	[]	[]	['https://twitter.com/magdi_halim/status/1695415669133627612/video/1']	[]	[]	[]	[]	[]	[]	TRUE	[]	2023-08-26 12:39:29	TRUE	تم تدمير أسلحة وذخائر قادمة من ليبيا للمليشيا بواسطة الطيران الحربي الجيش صاحي جغم في كل مكان وزمان .. https://t.co/zQjP81h0Cl	everyone	1	2019-05-14 09:15:56	‏‏‏‏‏‏‏‏‏‏‏‏‏‏‏‏‏‏‏‏‏‏‏‏‏‏‏‏‏‏‏‏رياضي،اكاديمي،مهتم بالطلاب،الوطن عضوسودنةجامعةالقاهرةفرع الخرطوم.من مؤسسي عمادةطلاب جامعةالنيلين، ‎#عضو_اتحاد_مغردي_السودان	[]	['عضو_اتحاد_مغردي_السودان']	[]		FALSE	131601	5723	195158	77	171992	FALSE	33	تم تدمير أسلحة وذخائر قادمة من ليبيا للمليشيا بواسطة الطيران الحربي الجيش صاحي جغم في كل مكان وزمان ..	104	{}	{}	0	1	[]	0
1199642899551526912	FALSE	18	15	37	1	2	0	1128227434703261952	ar	['السعوديه']	['Place']	[]	[]	['https://twitter.com/magdi_halim/status/1199642899551526912/video/1']	[]	[]	[]	[]	[]	[]	TRUE	[]	2019-11-27 10:55:30	TRUE	القبض على مصنع يحول زيت السيارات الى عسل يصنع في السعوديه ويصدر إلى الدول العربيه والاسلاميه والآن عرفنا سبب الامراض المنتشرة العالم تشرب زيت السيارات على أنه 🍯عسل ويقولون ملعقه على الريق تشفي ١٠٠ داء وهو زيت سوبر شل حسبي الله ونعم الوكيل https://t.co/w60Tx6h3c3	everyone	0	2019-05-14 09:15:56	‏‏‏‏‏‏‏‏‏‏‏‏‏‏‏‏‏‏‏‏‏‏‏‏‏‏‏‏‏‏‏‏رياضي،اكاديمي،مهتم بالطلاب،الوطن عضوسودنةجامعةالقاهرةفرع الخرطوم.من مؤسسي عمادةطلاب جامعةالنيلين، ‎#عضو_اتحاد_مغردي_السودان	[]	['عضو_اتحاد_مغردي_السودان']	[]		FALSE	131601	5723	195158	77	171992	FALSE	110	القبض على مصنع يحول زيت السيارات الى عسل يصنع في السعوديه ويصدر إلى الدول العربيه والاسلاميه والآن عرفنا سبب الامراض المنتشرة العالم تشرب زيت السيارات على أنه عسل ويقولون ملعقه على الريق تشفي ١٠٠ داء وهو زيت سوبر شل حسبي الله ونعم الوكيل	239	{'🍯': 'honey pot'}	{'🍯': 1}	1	1	[]	0
1624153822510608384	FALSE	8	6	89	0	1	5435	1128227434703261952	ar	['تركيا']	['Place']	[]	[]	['https://twitter.com/magdi_halim/status/1624153822510608384/photo/1']	[]	[]	[]	[]	[]	[]	TRUE	[]	2023-02-10 21:10:21	TRUE	وجدوا في أنقاض تركيا مليون و200 ألف دولار دون إيجاد أصحابهن كم مكث صاحبهم في جمعهن وكم تعب وكم شقي لأجلهن ولكن هل خرج من الدنيا بغير اللحد والكفن يا ابن آدم أجمعت الدنيا أم الدنيا جمعتك يا ابن آدم أتركت الدنيا أم الدنيا تركتك يا ابن آدم أين مالك ما أفقرك وأين قوتك ما أضعفك.. https://t.co/79F0jk1IVF	everyone	1	2019-05-14 09:15:56	‏‏‏‏‏‏‏‏‏‏‏‏‏‏‏‏‏‏‏‏‏‏‏‏‏‏‏‏‏‏‏‏رياضي،اكاديمي،مهتم بالطلاب،الوطن عضوسودنةجامعةالقاهرةفرع الخرطوم.من مؤسسي عمادةطلاب جامعةالنيلين، ‎#عضو_اتحاد_مغردي_السودان	[]	['عضو_اتحاد_مغردي_السودان']	[]		FALSE	131601	5723	195158	77	171992	FALSE	490	وجدوا في أنقاض تركيا مليون و200 ألف دولار دون إيجاد أصحابهن كم مكث صاحبهم في جمعهن وكم تعب وكم شقي لأجلهن ولكن هل خرج من الدنيا بغير اللحد والكفن يا ابن آدم أجمعت الدنيا أم الدنيا جمعتك يا ابن آدم أتركت الدنيا أم الدنيا تركتك يا ابن آدم أين مالك ما أفقرك وأين قوتك ما أضعفك..	277	{}	{}	0	1	[]	0
1695188574818210113	FALSE	14	14	50	0	1	2702	1577336174674320896	ar	[]	[]	[]	[]	['https://twitter.com/AsadOctober/status/1695188574818210113/video/1']	[]	[]	[]	[]	[]	[]	TRUE	[]	2023-08-25 21:37:05	TRUE	اول ضابط من ضباط جيش الأسد من العلوين من النساء يعلنون انشقاقهم عن جيش النظام الاسدي المجرم .. https://t.co/7Yl0P3prgn	everyone	1	2022-10-04 16:34:30	نحن لا نقرأ الخبر كما هو مكتوب و إنما نستشربه ونحلله إلى عناصره الاولية #مشروع_التعرية_الشاملة #يسقط_نظام_الملالي #العراق #الاحواز #فلسطين #سوريا #ال	[]	['مشروع_التعرية_الشاملة', 'يسقط_نظام_الملالي', 'العراق', 'الاحواز', 'فلسطين', 'سوريا', 'ال']	[]	England, United Kingdom	FALSE	4562	2388	7822	6	41859	FALSE	34	اول ضابط من ضباط جيش الأسد من العلوين من النساء يعلنون انشقاقهم عن جيش النظام الاسدي المجرم ..	95	{}	{}	0	0	[]	0
1695351317294661835	FALSE	27	71	580	1	2	19848	1321881615409304064	ar	['الجزائر']	['Place']	['الجزائر', 'البريكس', 'البريكس']	[]	[]	[]	[]	[]	[]	[]	[]	TRUE	[]	2023-08-26 08:23:46	FALSE	#الجزائر وإندونيسيا يتحصلان على صفة ملاحظ في مجموعة #البريكس الجزائر وأندونيسيا سيتحصلان على العضوية الكاملة في قمة #البريكس بروسيا المقررة مطلع 2024	everyone	1	2020-10-29 18:29:13	Syrian 🇸🇾 political news anchor & journalist/former @KwtTelevision & political news editor @almajlischannel Graduate PhD/MPhil - Digital Media	[]	[]	[]	secular	FALSE	64455	194	9213	48	12385	FALSE	35	الجزائر وإندونيسيا يتحصلان على صفة ملاحظ في مجموعة البريكس الجزائر وأندونيسيا سيتحصلان على العضوية الكاملة في قمة البريكس بروسيا المقررة مطلع 2024	151	{}	{}	0	1	[]	0
1693018771818950760	FALSE	18	25	215	7	8	17890	1321881615409304064	ar	['السوريين']	['Place']	['تركيا']	[]	['https://twitter.com/shafiee_ola/status/1693018771818950760/photo/1', 'https://twitter.com/shafiee_ola/status/1693018771818950760/photo/1', 'https://twitter.com/shafiee_ola/status/1693018771818950760/photo/1']	[]	[]	[]	[]	[]	[]	TRUE	[]	2023-08-19 21:55:04	TRUE	انظروا أين وصل الأتراك في حقدهم ضد السوريين في #تركيا تم إطلاق موقع اسمه "السوريون" يعطي الموقع جوائز لمن يقـ.ـتل سورياً أو يقـ.ـطع يـ.ـده أو رأسـ.ـه أو يقـ.ـتل طفلاً الدفع بواسطة البيتكوين لا يمكن مراقبته أناده عينة لتعليقات بعض الأتراك ودولة أردغان(الأنصار) صامتة صمت القبور https://t.co/MKUA3EYHWr	everyone	1	2020-10-29 18:29:13	Syrian 🇸🇾 political news anchor & journalist/former @KwtTelevision & political news editor @almajlischannel Graduate PhD/MPhil - Digital Media	[]	[]	[]	secular	FALSE	64455	194	9213	48	12385	FALSE	54	انظروا أين وصل الأتراك في حقدهم ضد السوريين في تركيا تم إطلاق موقع اسمه السوريون يعطي الموقع جوائز لمن يقـ.ـتل سورياً أو يقـ.ـطع يـ.ـده أو رأسـ.ـه أو يقـ.ـتل طفلاً الدفع بواسطة البيتكوين لا يمكن مراقبته أناده عينة لتعليقات بعض الأتراك ودولة أردغانالأنصار صامتة صمت القبور	276	{}	{}	0	1	[]	0
1691246700759744512	FALSE	3	17	187	0	0	4457	1321881615409304064	ar	['تل', 'أبيب']	['Place', 'Place']	[]	[]	[]	[]	[]	[]	[]	[]	[]	TRUE	[]	2023-08-15 00:33:29	TRUE	انفجار ضخم في مصنع كيماويات شمال تل أبيب، ومخاوف من تسرب مواد كيميائية.	everyone	0	2020-10-29 18:29:13	Syrian 🇸🇾 political news anchor & journalist/former @KwtTelevision & political news editor @almajlischannel Graduate PhD/MPhil - Digital Media	[]	[]	[]	secular	FALSE	64455	194	9213	48	12385	FALSE	66	انفجار ضخم في مصنع كيماويات شمال تل أبيب، ومخاوف من تسرب مواد كيميائية.	71	{}	{}	0	2	[]	0
1665354981766037505	FALSE	104	102	901	13	8	50068	1321881615409304064	ar	['سيناء', 'مصر', 'إسرائيل']	['Place', 'Place', 'Place']	['الجندي_المصري']	[]	['https://twitter.com/shafiee_ola/status/1665354981766037505/video/1']	[]	[]	[]	[]	[]	[]	TRUE	[]	2023-06-04 13:49:03	TRUE	فيديو مهيب تقشعر له الأبدان من تشييع #الجندي_المصري الذي استشهد في سيناء . مصر نعم طبعت مع إسرائيل .. لكن الشعوب دائما لديها وجهة نظر أخرى .. https://t.co/ENRugkwQOT	everyone	1	2020-10-29 18:29:13	Syrian 🇸🇾 political news anchor & journalist/former @KwtTelevision & political news editor @almajlischannel Graduate PhD/MPhil - Digital Media	[]	[]	[]	secular	FALSE	64455	194	9213	48	12385	FALSE	239	فيديو مهيب تقشعر له الأبدان من تشييع الجندي المصري الذي استشهد في سيناء . مصر نعم طبعت مع إسرائيل .. لكن الشعوب دائما لديها وجهة نظر أخرى ..	142	{}	{}	0	3	[]	0
1586356523907043328	FALSE	8	9	79	0	2	0	1321881615409304064	ar	['ترامب', 'تويتر']	['Person', 'Product']	[]	[]	['https://twitter.com/shafiee_ola/status/1586356523907043328/photo/1']	[]	[]	['Business Taxonomy', 'Business Taxonomy', 'Person', 'Entities [Entity Service]', 'Brand', 'Interests and Hobbies Vertical', 'Interests and Hobbies Category', 'Unified Twitter Taxonomy', 'Unified Twitter Taxonomy', 'Unified Twitter Taxonomy']	['Categories within Brand Verticals that narrow down the scope of Brands', 'Categories within Brand Verticals that narrow down the scope of Brands', 'Named people in the world like Nelson Mandela', 'Entity Service top level domain, every item that is in Entity Service should be in this domain', 'Brands and Companies', 'Top level interests and hobbies groupings, like Food or Travel', 'A grouping o…	['Financial Services Business', 'Technology Business', 'Elon Musk', 'Services', 'X', 'Business & finance', 'Leadership', 'Elon Musk', 'Tech personalities', 'Business personalities']	['Brands, companies, advertisers and every non-person handle with the profit intent related to Banks, Credit cards, Insurance, Investments, Stocks ', 'Brands, companies, advertisers and every non-person handle with the profit intent related to softwares, apps, communication equipments, hardwares', 'Elon Musk', '', '', '', 'Leadership', 'Elon Musk', 'Tech Professionals', '']	TRUE	[]	2022-10-29 13:57:23	TRUE	إيلون ماسك للموظفة التي أوقفت حساب ترامب على تويتر: أنتي مطرودة!. https://t.co/y88sLRoGSx	everyone	1	2020-10-29 18:29:13	Syrian 🇸🇾 political news anchor & journalist/former @KwtTelevision & political news editor @almajlischannel Graduate PhD/MPhil - Digital Media	[]	[]	[]	secular	FALSE	64455	194	9213	48	12385	FALSE	690	إيلون ماسك للموظفة التي أوقفت حساب ترامب على تويتر: أنتي مطرودة.	65	{}	{}	0	2	[]	0
1573036399594700800	FALSE	0	7	31	0	0	0	1321881615409304064	ar	[]	[]	['مشفى_الباسل', 'طرطوس']	[]	['https://twitter.com/shafiee_ola/status/1573036399594700800/photo/1']	[]	[]	[]	[]	[]	[]	TRUE	[]	2022-09-22 19:47:57	TRUE	34 شخص لقوا مصرعهم حتى الآن تم انتشالهم من الزورق الغارق أمام جزيرة يبرود في طرطوس .. سوريون ولبنانيون وفلسطينيون .. رحمهم الله .. وشفى من نجى منهم #مشفى_الباسل #طرطوس https://t.co/KUkiAR30eg	everyone	1	2020-10-29 18:29:13	Syrian 🇸🇾 political news anchor & journalist/former @KwtTelevision & political news editor @almajlischannel Graduate PhD/MPhil - Digital Media	[]	[]	[]	secular	FALSE	64455	194	9213	48	12385	FALSE	799	34 شخص لقوا مصرعهم حتى الآن تم انتشالهم من الزورق الغارق أمام جزيرة يبرود في طرطوس .. سوريون ولبنانيون وفلسطينيون .. رحمهم الله .. وشفى من نجى منهم مشفى الباسل طرطوس	169	{}	{}	0	0	[]	0
1570808228518428672	FALSE	116	243	739	31	7	0	1321881615409304064	ar	['الجزائر']	['Place']	[]	[]	['https://twitter.com/shafiee_ola/status/1570808228518428672/photo/1', 'https://twitter.com/shafiee_ola/status/1570808228518428672/photo/1']	[]	[]	['Business Taxonomy', 'Unified Twitter Taxonomy', 'Unified Twitter Taxonomy', 'Food', 'Product Taxonomy']	['Categories within Brand Verticals that narrow down the scope of Brands', 'A taxonomy of user interests. ', 'A taxonomy of user interests. ', 'Topics about food, like Donuts or Brunch', 'A product taxonomy for labeling categories of products. ']	['Food & Beverage Business', 'Drinks', 'Milk', 'Milk', 'Milk']	['Brands, companies, advertisers and every non-person handle with the profit intent and related to foods & beverages such as snacks, soft drinks, beers.', 'Drinks', 'Milk', 'Milk', 'Milk']	TRUE	[]	2022-09-16 16:14:00	TRUE	حقيقة صورة "طابور الحليب" في الجزائر التي حظيت بمشاركات قياسية على مواقع التواصل الاجتماعي ، وزعم ناشروها أنها لصف طويل لجزائريين ينتظرون دورهم لشراء كيس من الحليب هي في الحقيقة صورة توثق طابورا طويل في مقاطعة خنان الصينية في فبراير عام 2014 بعد افتتاح معرض التوظيف الربيعي. https://t.co/Se4jYBSfwV	everyone	0	2020-10-29 18:29:13	Syrian 🇸🇾 political news anchor & journalist/former @KwtTelevision & political news editor @almajlischannel Graduate PhD/MPhil - Digital Media	[]	[]	[]	secular	FALSE	64455	194	9213	48	12385	FALSE	829	حقيقة صورة طابور الحليب في الجزائر التي حظيت بمشاركات قياسية على مواقع التواصل الاجتماعي ، وزعم ناشروها أنها لصف طويل لجزائريين ينتظرون دورهم لشراء كيس من الحليب هي في الحقيقة صورة توثق طابورا طويل في مقاطعة خنان الصينية في فبراير عام 2014 بعد افتتاح معرض التوظيف الربيعي.	273	{}	{}	0	1	[]	0
1568004575625641985	FALSE	2	7	24	0	2	0	1321881615409304064	ar	['ترامب']	['Person']	['الملكة_إليزابيث']	[]	['https://twitter.com/shafiee_ola/status/1568004575625641985/video/1']	[]	[]	['Person', 'Politician', 'Unified Twitter Taxonomy', 'Unified Twitter Taxonomy', 'Unified Twitter Taxonomy']	['Named people in the world like Nelson Mandela', 'Politicians in the world, like Joe Biden', 'A taxonomy of user interests. ', 'A taxonomy of user interests. ', 'A taxonomy of user interests. ']	['Elizabeth II', 'Elizabeth II', 'Elizabeth II', 'Politics', 'Political figures']	['Queen of the United Kingdom and the other Commonwealth realms', 'Queen of the United Kingdom and the other Commonwealth realms', 'Queen of the United Kingdom and the other Commonwealth realms', 'Politics', 'Politician']	TRUE	[]	2022-09-08 22:33:17	TRUE	ترامب .. أنا حزين لسماع وفاة #الملكة_إليزابيث كانت إمرأة رائعة اتفقنا أو اختلفنا .. https://t.co/DmaBlOcI5m	everyone	1	2020-10-29 18:29:13	Syrian 🇸🇾 political news anchor & journalist/former @KwtTelevision & political news editor @almajlischannel Graduate PhD/MPhil - Digital Media	[]	[]	[]	secular	FALSE	64455	194	9213	48	12385	FALSE	841	ترامب .. أنا حزين لسماع وفاة الملكة إليزابيث كانت إمرأة رائعة اتفقنا أو اختلفنا ..	87	{}	{}	0	1	[]	0
1695011523758805005	FALSE	1	4	9	0	0	2613	497056290	ar	['ترامب']	['Person']	[]	[]	['https://twitter.com/ali14ha/status/1695011523758805005/video/1']	[]	[]	[]	[]	[]	[]	TRUE	[]	2023-08-25 09:53:33	TRUE	فرحة الامريكيين عند سماع نبأ اعتقال الرئيس الامريكي ترامب ونشر صورة له في مركز الشرطة حيث تعد انها سابقة لاول مرة التقاط صورة جنائية لرئيس امريكي https://t.co/BAhXXWf3Jv	everyone	1	2012-02-19 15:31:24		[]	[]	[]	بغداد- الكاظمية	FALSE	1363	1595	18921	1	25595	FALSE	36	فرحة الامريكيين عند سماع نبأ اعتقال الرئيس الامريكي ترامب ونشر صورة له في مركز الشرطة حيث تعد انها سابقة لاول مرة التقاط صورة جنائية لرئيس امريكي	146	{}	{}	0	1	[]	0
1694607557594054668	FALSE	20	88	208	7	18	95119	3331605652	ar	['الصين']	['Place']	[]	[]	['https://twitter.com/Amrrrrrr33/status/1694601065705165297/video/1']	[]	[]	['Business Taxonomy']	['Categories within Brand Verticals that narrow down the scope of Brands']	['Gaming Business']	['Brands, companies, advertisers and every non-person handle with the profit intent related to offline and online games such as gaming consoles, tabletop games, video game publishers']	TRUE	[]	2023-08-24 07:08:20	TRUE	مقطع متداول لسحابة في الصين تشكلت بهذا الشكل https://t.co/HPdBrcZ8Cn	everyone	1	2015-06-17 17:43:28	حساب يهتم بنقل كل ما يحدث حول العالم من أمور تهم المتابع العربي.. للإعلان، تواصل معنا عبر الخاص أو على ScreenMix@PandorasBoxeg.com	[]	[]	[]	Middle East	FALSE	2483601	144	90915	2107	19864	TRUE	37	مقطع متداول لسحابة في الصين تشكلت بهذا الشكل	46	{}	{}	0	1	[]	0
1685316708636987392	FALSE	182	446	5416	97	50	1030292	3331605652	ar	['رياض محرز', 'الأهلي']	['Person', 'Organization']	[]	[]	['https://twitter.com/ScreenMix/status/1685316708636987392/photo/1']	[]	[]	['Business Taxonomy', 'Person', 'Athlete']	['Categories within Brand Verticals that narrow down the scope of Brands', 'Named people in the world like Nelson Mandela', 'An athlete in the world, like Serena Williams or Lionel Messi']	['Sports & Fitness Business', 'Riyad Mahrez', 'Riyad Mahrez']	['Brands, companies, advertisers and every non-person handle with the profit intent related to sports nutrition, athletic apparel, sports apps, fitness venues', '', '']	TRUE	[]	2023-07-29 15:49:49	TRUE	رياض محرز : "أنا مسلم وهذا هو السبب الرئيسي وراء التعاقد مع الأهلي، كانت لدي عروض كثيرة ، لكنني أردت أن أعيش في بلد مسلم💚💚". https://t.co/oHS091xkQP	everyone	1	2015-06-17 17:43:28	حساب يهتم بنقل كل ما يحدث حول العالم من أمور تهم المتابع العربي.. للإعلان، تواصل معنا عبر الخاص أو على ScreenMix@PandorasBoxeg.com	[]	[]	[]	Middle East	FALSE	2483601	144	90915	2107	19864	TRUE	86	رياض محرز : أنا مسلم وهذا هو السبب الرئيسي وراء التعاقد مع الأهلي، كانت لدي عروض كثيرة ، لكنني أردت أن أعيش في بلد مسلم.	122	{'💚': 'green heart'}	{'💚': 2}	2	2	['الأهلي']	1
1539575250664525825	FALSE	29	28	999	6	3	0	3331605652	ar	['بايرن ميونخ']	['Organization']	[]	[]	['https://twitter.com/ScreenMix/status/1539575250664525825/photo/1']	[]	[]	['Sports Team', 'Person', 'Athlete', 'Interests and Hobbies Category', 'Interests and Hobbies', 'Unified Twitter Taxonomy', 'Events [Entity Service]']	['A sports team organization, like Arsenal and the Boston Celtics', 'Named people in the world like Nelson Mandela', 'An athlete in the world, like Serena Williams or Lionel Messi', 'A grouping of interests and hobbies entities, like Novelty Food or Destinations', 'Interests, opinions, and behaviors of individuals, groups, or cultures; like Speciality Cooking or Theme Parks', 'A taxonomy of user …	['FC Bayern Munich', 'Sadio Mane', 'Sadio Mane', 'General Fashion', 'Tops', 'Sadio Mane', 'ساديو ماني يجري الفحص الطبي قبل انضمامه لنادي بايرن ميونخ']	['', '', '', 'General Fashion', 'Tops', '', 'أجرى اللاعب السنغالي، ساديو ماني، الفحص الطبي في ميونخ، الثلاثاء، استعدادا لانضمامه للبايرن. وقال ماني عن انضمامه للفريق "بالنسبة لي بايرن النادي المناسب في الوقت المناسب.". \n\nالتغريدات التالية مختارة بواسطة خوارزمية تعكس آخر التطورات.']	TRUE	[]	2022-06-22 11:45:18	TRUE	رسميا : قميص بايرن ميونخ يتزين بلاعب الفريق الجديد ساديو ماني ❤ https://t.co/Tpboi3GLYz	everyone	0	2015-06-17 17:43:28	حساب يهتم بنقل كل ما يحدث حول العالم من أمور تهم المتابع العربي.. للإعلان، تواصل معنا عبر الخاص أو على ScreenMix@PandorasBoxeg.com	[]	[]	[]	Middle East	FALSE	2483601	144	90915	2107	19864	TRUE	104	رسميا : قميص بايرن ميونخ يتزين بلاعب الفريق الجديد ساديو ماني	64	{'❤': 'red heart'}	{'❤': 1}	1	1	['بايرن ميونخ']	1
1653162960016031744	FALSE	135	40	1259	9	36	135628	3331605652	ar	['أمريكا']	['Place']	[]	[]	['https://twitter.com/VIDE01101/status/1653162810673704962/video/1']	[]	[]	['Political Body', 'Unified Twitter Taxonomy']	['A section of a government, like The Supreme Court', 'A taxonomy of user interests. ']	['The White House', 'The White House']	['Conversation from and about the White House, both as a destination and as political voice', 'Conversation from and about the White House, both as a destination and as political voice']	TRUE	[]	2023-05-01 22:22:18	TRUE	آيات من الذكر الحكيم تُتلى في البيت الأبيض على سمع بايدن رئيس أمريكا في احتفالية بعيد الفطر ❤️ https://t.co/tH13hL1Eap	everyone	0	2015-06-17 17:43:28	حساب يهتم بنقل كل ما يحدث حول العالم من أمور تهم المتابع العربي.. للإعلان، تواصل معنا عبر الخاص أو على ScreenMix@PandorasBoxeg.com	[]	[]	[]	Middle East	FALSE	2483601	144	90915	2107	19864	TRUE	134	آيات من الذكر الحكيم تُتلى في البيت الأبيض على سمع بايدن رئيس أمريكا في احتفالية بعيد الفطر	94	{'❤️': 'red heart'}	{'❤️': 1}	1	1	[]	0
1292838417789857792	FALSE	755	311	5114	1019	172	0	3331605652	ar	['روسيا']	['Place']	[]	[]	['https://twitter.com/herooftheday10/status/1292770119018586113/video/1']	[]	[]	[]	[]	[]	[]	TRUE	[]	2020-08-10 15:01:13	TRUE	انفجار هائل في محطة وقود في جنوب غرب روسيا اليوم، وإصابة ما لا يقل عن 13 شخص. https://t.co/PntiyEkX3u	everyone	0	2015-06-17 17:43:28	حساب يهتم بنقل كل ما يحدث حول العالم من أمور تهم المتابع العربي.. للإعلان، تواصل معنا عبر الخاص أو على ScreenMix@PandorasBoxeg.com	[]	[]	[]	Middle East	FALSE	2483601	144	90915	2107	19864	TRUE	190	انفجار هائل في محطة وقود في جنوب غرب روسيا اليوم، وإصابة ما لا يقل عن 13 شخص.	78	{}	{}	0	1	[]	0
1658909020218957851	FALSE	118	212	2711	39	35	590505	3331605652	ar	['عادل إمام']	['Person']	[]	[]	['https://twitter.com/ScreenMix/status/1658909020218957851/photo/1']	[]	[]	['Person', 'Actor', 'Unified Twitter Taxonomy', 'Unified Twitter Taxonomy']	['Named people in the world like Nelson Mandela', 'An actor or actress in the world, like Kate Winslet or Leonardo DiCaprio', 'A taxonomy of user interests. ', 'A taxonomy of user interests. ']	['Adel Imam', 'Adel Imam', 'Adel Imam', 'Egyptian actors']	['', '', '', '']	TRUE	[]	2023-05-17 18:55:06	TRUE	أحدث ظهور للزعيم عادل إمام في عيد ميلاده الـ 83 ❤ https://t.co/pUgAde5mBF	everyone	0	2015-06-17 17:43:28	حساب يهتم بنقل كل ما يحدث حول العالم من أمور تهم المتابع العربي.. للإعلان، تواصل معنا عبر الخاص أو على ScreenMix@PandorasBoxeg.com	[]	[]	[]	Middle East	FALSE	2483601	144	90915	2107	19864	TRUE	285	أحدث ظهور للزعيم عادل إمام في عيد ميلاده الـ 83	49	{'❤': 'red heart'}	{'❤': 1}	1	1	[]	0
1550818994248105984	FALSE	81	66	1570	18	15	0	3331605652	ar	['وكالة الفضاء المصرية', 'سارة صبري']	['Organization', 'Person']	[]	[]	['https://twitter.com/ScreenMix/status/1550818994248105984/photo/1']	[]	[]	['Entities [Entity Service]', 'Brand', 'Entities [Entity Service]', 'Unified Twitter Taxonomy', 'Unified Twitter Taxonomy', 'Fields of study', 'Entities [Entity Service]', 'Interests and Hobbies']	['Entity Service top level domain, every item that is in Entity Service should be in this domain', 'Brands and Companies', 'Entity Service top level domain, every item that is in Entity Service should be in this domain', 'A taxonomy of user interests. ', 'A taxonomy of user interests. ', 'for all fields of study, e.g., futurology, microbiology ', 'Entity Service top level domain, every item that …	['Aerospace', 'Blue Origin', 'Science', 'Blue Origin', 'Space agencies & companies', 'Science', 'Travel', 'Travel Actions']	['Aerospace', 'Blue Origin', 'Science', 'Blue Origin', '', 'Science', 'Travel', 'This entity includes all conversations about travel and vacation.']	TRUE	[]	2022-07-23 12:23:55	TRUE	في حدث جميل: وكالة الفضاء المصرية تهنىء "سارة صبري" لكونها أول مصرية تسافر للفضاء ضمن رحلة New Shepard 22، التابعة لشركة Blue Origin التابعة لرجل الأعمال جيف بيزوس ❤️ https://t.co/XkNyOZxldB	everyone	0	2015-06-17 17:43:28	حساب يهتم بنقل كل ما يحدث حول العالم من أمور تهم المتابع العربي.. للإعلان، تواصل معنا عبر الخاص أو على ScreenMix@PandorasBoxeg.com	[]	[]	[]	Middle East	FALSE	2483601	144	90915	2107	19864	TRUE	287	في حدث جميل: وكالة الفضاء المصرية تهنىء سارة صبري لكونها أول مصرية تسافر للفضاء ضمن رحلة 22، التابعة لشركة التابعة لرجل الأعمال جيف بيزوس	144	{'❤️': 'red heart'}	{'❤️': 1}	1	2	['وكالة الفضاء المصرية']	1
1655920124249948161	FALSE	62	80	474	25	101	389113	3331605652	ar	[]	[]	[]	[]	['https://twitter.com/Amrrrrrr33/status/1655912844766920706/video/1']	[]	[]	[]	[]	[]	[]	TRUE	[]	2023-05-09 12:58:17	TRUE	مقطع للتنمر الذي تعرض له الصبي الصربي والذي يبلغ من العمر 13 الذي قتل 8 اطفال من بينهم 7 طالبات ثم اتصل بالشرطة وسلم نفسه ولن يحاكم وسيأخذ عفو لأنه تحت السن القانوني https://t.co/TarffuInIm	everyone	1	2015-06-17 17:43:28	حساب يهتم بنقل كل ما يحدث حول العالم من أمور تهم المتابع العربي.. للإعلان، تواصل معنا عبر الخاص أو على ScreenMix@PandorasBoxeg.com	[]	[]	[]	Middle East	FALSE	2483601	144	90915	2107	19864	TRUE	301	مقطع للتنمر الذي تعرض له الصبي الصربي والذي يبلغ من العمر 13 الذي قتل 8 اطفال من بينهم 7 طالبات ثم اتصل بالشرطة وسلم نفسه ولن يحاكم وسيأخذ عفو لأنه تحت السن القانوني	167	{}	{}	0	0	[]	0
1649922871500611584	FALSE	71	447	1410	99	158	3301257	3331605652	ar	['السعودية']	['Place']	[]	[]	['https://twitter.com/malak40069373/status/1649908456822849542/video/1']	[]	[]	[]	[]	[]	[]	TRUE	[]	2023-04-22 23:47:21	TRUE	مقطع متداول لرجل يقال أنه أطول رجل في السعودية 🤯 https://t.co/Y9d2XRki1M	everyone	1	2015-06-17 17:43:28	حساب يهتم بنقل كل ما يحدث حول العالم من أمور تهم المتابع العربي.. للإعلان، تواصل معنا عبر الخاص أو على ScreenMix@PandorasBoxeg.com	[]	[]	[]	Middle East	FALSE	2483601	144	90915	2107	19864	TRUE	346	مقطع متداول لرجل يقال أنه أطول رجل في السعودية	48	{'🤯': 'exploding head'}	{'🤯': 1}	1	1	[]	0
1705652143141646640	FALSE	3	46	83	2	4	59973	3331605652	ar	['السعودية']	['Place']	[]	[]	['https://twitter.com/vid5598176/status/1705616017211232579/video/1']	[]	[]	[]	[]	[]	[]	TRUE	[]	2023-09-23 18:35:35	TRUE	مقطع متداول لرجل يقال أنه أطول رجل في السعودية 🤯 https://t.co/qbISvqUkKz	everyone	1	2015-06-17 17:43:28	حساب يهتم بنقل كل ما يحدث حول العالم من أمور تهم المتابع العربي.. للإعلان، تواصل معنا عبر الخاص أو على ScreenMix@PandorasBoxeg.com	[]	[]	[]	Middle East	FALSE	2483601	144	90915	2107	19864	TRUE	346	مقطع متداول لرجل يقال أنه أطول رجل في السعودية	48	{'🤯': 'exploding head'}	{'🤯': 1}	1	1	[]	0
1643719044732780550	FALSE	132	50	2874	13	10	198105	3331605652	ar	['بنزيما', 'ريال مدريد', 'برشلونة']	['Person', 'Organization', 'Organization']	[]	[]	['https://twitter.com/ScreenMix/status/1643719044732780550/photo/1']	[]	[]	['Sports Event', 'Person', 'Sport', 'Sports Team', 'Sports League', 'Sports League', 'Events [Entity Service]', 'Soccer Match', 'Business Taxonomy', 'Athlete', 'Unified Twitter Taxonomy', 'Unified Twitter Taxonomy', 'Sports Team']	['', 'Named people in the world like Nelson Mandela', 'Types of sports, like soccer and basketball', 'A sports team organization, like Arsenal and the Boston Celtics', '', '', 'Real world events. ', 'Sports Event specific to Soccer matches', 'Categories within Brand Verticals that narrow down the scope of Brands', 'An athlete in the world, like Serena Williams or Lionel Messi', 'A taxonomy of use…	['FC Barcelona vs Real Madrid', 'Karim Benzema', 'Soccer', 'FC Barcelona', 'Spain - Soccer', 'Copa del Rey', 'FC Barcelona vs Real Madrid', 'FC Barcelona vs Real Madrid', 'Sports & Fitness Business', 'Karim Benzema', 'FC Barcelona', 'Karim Benzema', 'Real Madrid CF']	['', '', '', '', '', '', '', '', 'Brands, companies, advertisers and every non-person handle with the profit intent related to sports nutrition, athletic apparel, sports apps, fitness venues', '', '', '', '']	TRUE	[]	2023-04-05 20:55:33	TRUE	الأسطورة بنزيما يصبح ثاني لاعب في تاريخ ريال مدريد يسجل هاتريك في الكلاسيكو ضد برشلونة بعد بوشكاش منذ عام 1962/63 https://t.co/GHgnURXhY8	everyone	1	2015-06-17 17:43:28	حساب يهتم بنقل كل ما يحدث حول العالم من أمور تهم المتابع العربي.. للإعلان، تواصل معنا عبر الخاص أو على ScreenMix@PandorasBoxeg.com	[]	[]	[]	Middle East	FALSE	2483601	144	90915	2107	19864	TRUE	384	الأسطورة بنزيما يصبح ثاني لاعب في تاريخ ريال مدريد يسجل هاتريك في الكلاسيكو ضد برشلونة بعد بوشكاش منذ عام 196263	113	{}	{}	0	3	['ريال مدريد', 'برشلونة']	2
1641464833546518534	FALSE	223	903	3326	531	592	4445886	3331605652	ar	['الصين']	['Place']	[]	[]	['https://twitter.com/Amrrrrrr33/status/1641444516774445056/video/1']	[]	[]	['Business Taxonomy']	['Categories within Brand Verticals that narrow down the scope of Brands']	['Gaming Business']	['Brands, companies, advertisers and every non-person handle with the profit intent related to offline and online games such as gaming consoles, tabletop games, video game publishers']	TRUE	[]	2023-03-30 15:38:07	FALSE	مقطع متداول يقال انه لفايروس جديد ظهر في الصين ! 😨 https://t.co/D859q8lZoY	everyone	1	2015-06-17 17:43:28	حساب يهتم بنقل كل ما يحدث حول العالم من أمور تهم المتابع العربي.. للإعلان، تواصل معنا عبر الخاص أو على ScreenMix@PandorasBoxeg.com	[]	[]	[]	Middle East	FALSE	2483601	144	90915	2107	19864	TRUE	396	مقطع متداول يقال انه لفايروس جديد ظهر في الصين	49	{'😨': 'fearful face'}	{'😨': 1}	1	1	[]	0
1446494185478103057	FALSE	932	268	15483	163	82	0	3331605652	ar	['ألمانيا']	['Place']	[]	[]	['https://twitter.com/ScreenMix/status/1446494185478103057/photo/1']	[]	[]	[]	[]	[]	[]	TRUE	[]	2021-10-08 15:14:23	TRUE	عاجل : ألمانيا تسمح برفع الأذان عبر مكبرات الصوت في المساجد من جديد https://t.co/ugL0cVF8ga	everyone	1	2015-06-17 17:43:28	حساب يهتم بنقل كل ما يحدث حول العالم من أمور تهم المتابع العربي.. للإعلان، تواصل معنا عبر الخاص أو على ScreenMix@PandorasBoxeg.com	[]	[]	[]	Middle East	FALSE	2483601	144	90915	2107	19864	TRUE	401	عاجل : ألمانيا تسمح برفع الأذان عبر مكبرات الصوت في المساجد من جديد	69	{}	{}	0	1	[]	0
1632441046092087297	FALSE	544	172	10553	105	24	806449	3331605652	ar	['محمد صلاح', 'ليفربول']	['Person', 'Organization']	[]	[]	['https://twitter.com/ScreenMix/status/1632441046092087297/photo/1']	[]	[]	['Business Taxonomy', 'Person', 'Sport', 'Sports Team', 'Athlete', 'Unified Twitter Taxonomy']	['Categories within Brand Verticals that narrow down the scope of Brands', 'Named people in the world like Nelson Mandela', 'Types of sports, like soccer and basketball', 'A sports team organization, like Arsenal and the Boston Celtics', 'An athlete in the world, like Serena Williams or Lionel Messi', 'A taxonomy of user interests. ']	['Sports & Fitness Business', 'Mohamed Salah', 'Soccer', 'Liverpool FC', 'Mohamed Salah', 'Liverpool FC']	['Brands, companies, advertisers and every non-person handle with the profit intent related to sports nutrition, athletic apparel, sports apps, fitness venues', '', '', '', '', '']	TRUE	[]	2023-03-05 18:00:49	TRUE	عاجل : الملك المصري محمد صلاح أصبح أسطورة وهداف ليفربول التاريخي ❤ https://t.co/oxfgW462uR	everyone	1	2015-06-17 17:43:28	حساب يهتم بنقل كل ما يحدث حول العالم من أمور تهم المتابع العربي.. للإعلان، تواصل معنا عبر الخاص أو على ScreenMix@PandorasBoxeg.com	[]	[]	[]	Middle East	FALSE	2483601	144	90915	2107	19864	TRUE	441	عاجل : الملك المصري محمد صلاح أصبح أسطورة وهداف ليفربول التاريخي	67	{'❤': 'red heart'}	{'❤': 1}	1	2	['ليفربول']	1
1627976472320176128	FALSE	74	193	826	28	112	1414621	3331605652	ar	[]	[]	[]	[]	['https://twitter.com/scienceworld224/status/1626974826781937664/video/1']	[]	[]	[]	[]	[]	[]	TRUE	[]	2023-02-21 10:20:11	TRUE	أحد علماء الفلك لاحظ على وجه الصدفه عندما طان يصور القمر أن جسم غريب يهبط على القمر 😳! https://t.co/vUW10Z1ut9	everyone	1	2015-06-17 17:43:28	حساب يهتم بنقل كل ما يحدث حول العالم من أمور تهم المتابع العربي.. للإعلان، تواصل معنا عبر الخاص أو على ScreenMix@PandorasBoxeg.com	[]	[]	[]	Middle East	FALSE	2483601	144	90915	2107	19864	TRUE	465	أحد علماء الفلك لاحظ على وجه الصدفه عندما طان يصور القمر أن جسم غريب يهبط على القمر	85	{'😳': 'flushed face'}	{'😳': 1}	1	0	[]	0
1622625656423997443	FALSE	134	48	1032	21	55	227872	3331605652	ar	[]	[]	[]	[]	['https://twitter.com/Headlineznow/status/1622561983869640704/video/1']	[]	[]	[]	[]	[]	[]	TRUE	[]	2023-02-06 15:57:58	TRUE	اللحظات المرعبة التي عاشوها المواطنين أثناء حدوث الزلزال 😥 https://t.co/iu0YDvMmga	everyone	1	2015-06-17 17:43:28	حساب يهتم بنقل كل ما يحدث حول العالم من أمور تهم المتابع العربي.. للإعلان، تواصل معنا عبر الخاص أو على ScreenMix@PandorasBoxeg.com	[]	[]	[]	Middle East	FALSE	2483601	144	90915	2107	19864	TRUE	508	اللحظات المرعبة التي عاشوها المواطنين أثناء حدوث الزلزال	58	{'😥': 'sad but relieved face'}	{'😥': 1}	1	0	[]	0
1614954106069598208	FALSE	1044	1051	16692	198	328	5504853	3331605652	ar	['مكة']	['Place']	[]	[]	['https://twitter.com/ScreenMix/status/1614954106069598208/photo/1']	[]	[]	[]	[]	[]	[]	TRUE	[]	2023-01-16 11:53:57	TRUE	هذا ليس الريف الدينماركي او السويسري .. بل هذا جمال مكة 💚🇸🇦 https://t.co/MxcyVIl33V	everyone	1	2015-06-17 17:43:28	حساب يهتم بنقل كل ما يحدث حول العالم من أمور تهم المتابع العربي.. للإعلان، تواصل معنا عبر الخاص أو على ScreenMix@PandorasBoxeg.com	[]	[]	[]	Middle East	FALSE	2483601	144	90915	2107	19864	TRUE	554	هذا ليس الريف الدينماركي او السويسري .. بل هذا جمال مكة	57	{'💚': 'green heart', '🇸🇦': 'flag: Saudi Arabia'}	{'💚': 1, '🇸🇦': 1}	2	1	[]	0
1611740109245751296	FALSE	93	159	1438	52	64	895772	3331605652	ar	['دبي']	['Place']	[]	[]	['https://twitter.com/ScreenMix/status/1611740109245751296/photo/1', 'https://twitter.com/ScreenMix/status/1611740109245751296/photo/1', 'https://twitter.com/ScreenMix/status/1611740109245751296/photo/1']	[]	[]	[]	[]	[]	[]	TRUE	[]	2023-01-07 15:02:41	TRUE	مشروع دبي القادم 🤯 https://t.co/ThCSWJ3GoF	everyone	1	2015-06-17 17:43:28	حساب يهتم بنقل كل ما يحدث حول العالم من أمور تهم المتابع العربي.. للإعلان، تواصل معنا عبر الخاص أو على ScreenMix@PandorasBoxeg.com	[]	[]	[]	Middle East	FALSE	2483601	144	90915	2107	19864	TRUE	577	مشروع دبي القادم	18	{'🤯': 'exploding head'}	{'🤯': 1}	1	1	[]	0
1610314573843767299	FALSE	943	1492	8153	391	224	3152621	3331605652	ar	['كرستيانو', 'الهلال', 'النصر']	['Person', 'Organization', 'Organization']	[]	[]	['https://twitter.com/ScreenMix/status/1610314573843767299/photo/1']	[]	[]	[]	[]	[]	[]	TRUE	[]	2023-01-03 16:38:07	TRUE	كرستيانو : متشوق لمواجهة نادي ضخم بحجم نادي الهلال بقميص النصر فأنا اعلم أنه من كبار أندية العالم https://t.co/72LWqTgwcq	everyone	1	2015-06-17 17:43:28	حساب يهتم بنقل كل ما يحدث حول العالم من أمور تهم المتابع العربي.. للإعلان، تواصل معنا عبر الخاص أو على ScreenMix@PandorasBoxeg.com	[]	[]	[]	Middle East	FALSE	2483601	144	90915	2107	19864	TRUE	587	كرستيانو : متشوق لمواجهة نادي ضخم بحجم نادي الهلال بقميص النصر فأنا اعلم أنه من كبار أندية العالم	99	{}	{}	0	3	['الهلال', 'النصر']	2
1660407552926949376	FALSE	90	118	2805	13	22	150526	3331605652	ar	['كرستيانو', 'رونالدو']	['Person', 'Person']	[]	[]	['https://twitter.com/ScreenMix/status/1660407552926949376/photo/1']	[]	[]	['Person', 'Business Taxonomy', 'Athlete']	['Named people in the world like Nelson Mandela', 'Categories within Brand Verticals that narrow down the scope of Brands', 'An athlete in the world, like Serena Williams or Lionel Messi']	['Cristiano Ronaldo', 'Sports & Fitness Business', 'Cristiano Ronaldo']	['', 'Brands, companies, advertisers and every non-person handle with the profit intent related to sports nutrition, athletic apparel, sports apps, fitness venues', '']	TRUE	[]	2023-05-21 22:09:44	TRUE	كرستيانو رونالدو يعلنها : نعم اخترتُ بلاد العرب لأني احبهم وأكثر جمهوري عربي دائماً ما كان معي هذا الجمهور انا اليوم معهم في الشرق الاوسط💚🇸🇦 https://t.co/OzqaJr8fH2	everyone	1	2015-06-17 17:43:28	حساب يهتم بنقل كل ما يحدث حول العالم من أمور تهم المتابع العربي.. للإعلان، تواصل معنا عبر الخاص أو على ScreenMix@PandorasBoxeg.com	[]	[]	[]	Middle East	FALSE	2483601	144	90915	2107	19864	TRUE	593	كرستيانو رونالدو يعلنها : نعم اخترتُ بلاد العرب لأني احبهم وأكثر جمهوري عربي دائماً ما كان معي هذا الجمهور انا اليوم معهم في الشرق الاوسط	139	{'💚': 'green heart', '🇸🇦': 'flag: Saudi Arabia'}	{'💚': 1, '🇸🇦': 1}	2	2	[]	0
1601653905934659586	FALSE	119	309	2475	194	46	0	3331605652	ar	['ليكيب', 'كريستيانو رونالدو']	['Person', 'Person']	[]	[]	['https://twitter.com/ScreenMix/status/1601653905934659586/photo/1']	[]	[]	['Sports Event', 'Sports Event', 'Person', 'Sport', 'Sports Team', 'Sports League', 'Sports League', 'Sports League', 'Events [Entity Service]', 'Events [Entity Service]', 'Sports Series', 'Soccer Match', 'Business Taxonomy', 'Athlete', 'Unified Twitter Taxonomy', 'Unified Twitter Taxonomy', 'Unified Twitter Taxonomy', 'Unified Twitter Taxonomy', 'Unified Twitter Taxonomy']	['', '', 'Named people in the world like Nelson Mandela', 'Types of sports, like soccer and basketball', 'A sports team organization, like Arsenal and the Boston Celtics', '', '', '', 'Real world events. ', 'Real world events. ', 'A grouping of sports events or series, for example 2014 pre-season, a tournament, or round', 'Sports Event specific to Soccer matches', 'Categories within Brand Vertica…	['2022 FIFA World Cup', 'Morocco vs Portugal', 'Cristiano Ronaldo', 'Soccer', 'Portugal', 'International - Soccer', '2022 FIFA World Cup', "FIFA Men's World Cup", '2022 FIFA World Cup', 'Morocco vs Portugal', '2022 FIFA World Cup', 'Morocco vs Portugal', 'Sports & Fitness Business', 'Cristiano Ronaldo', 'Portugal', "Men's national soccer teams", 'Sports events', "FIFA Men's World Cup", 'Events']	['', '', '', '', '', '', '', '', '', '', '', '', 'Brands, companies, advertisers and every non-person handle with the profit intent related to sports nutrition, athletic apparel, sports apps, fitness venues', '', '', 'National Soccer Teams', '', '', '']	TRUE	[]	2022-12-10 19:03:43	TRUE	عاجل ليكيب : كريستيانو رونالدو اخبر زملائه أنه سيعتزل كرة القدم الآن https://t.co/NrEoy104qr	everyone	1	2015-06-17 17:43:28	حساب يهتم بنقل كل ما يحدث حول العالم من أمور تهم المتابع العربي.. للإعلان، تواصل معنا عبر الخاص أو على ScreenMix@PandorasBoxeg.com	[]	[]	[]	Middle East	FALSE	2483601	144	90915	2107	19864	TRUE	599	عاجل ليكيب : كريستيانو رونالدو اخبر زملائه أنه سيعتزل كرة القدم الآن	70	{}	{}	0	2	[]	0
1424335399783211012	FALSE	478	80	8540	101	49	0	3331605652	ar	[]	[]	[]	[]	['https://twitter.com/ScreenMix/status/1424335399783211012/photo/1']	[]	[]	['Events [Entity Service]']	['Real world events. ']	['تشييع جنازة الفنانة دلال عبد العزيز']	['تشيع اليوم الأحد، جنازة الفنانة المصرية دلال عبد العزيز التي وافتها المنية بعد صراع مع المرض أمس السبت، عن عمر ناهز 61 عاما. هنا تجدون كافة التحديثات حول الجنازة ومراسمها.']	TRUE	[]	2021-08-08 11:43:16	TRUE	من نقل مركب الملك خوفو للمتحف المصري الكبير https://t.co/XNZjDZj9H6	everyone	0	2015-06-17 17:43:28	حساب يهتم بنقل كل ما يحدث حول العالم من أمور تهم المتابع العربي.. للإعلان، تواصل معنا عبر الخاص أو على ScreenMix@PandorasBoxeg.com	[]	[]	[]	Middle East	FALSE	2483601	144	90915	2107	19864	TRUE	614	من نقل مركب الملك خوفو للمتحف المصري الكبير	44	{}	{}	0	0	[]	0
1598852746722934784	FALSE	3047	490	28309	265	537	0	3331605652	ar	['مايكل بالاك', 'المانيا']	['Person', 'Place']	[]	[]	['https://twitter.com/ScreenMix/status/1598852746722934784/photo/1']	[]	[]	[]	[]	[]	[]	TRUE	[]	2022-12-03 01:32:54	TRUE	تصريح للتاريخ : مايكل بالاك أسطورة المانيا كيف نريد الفوز بكأس العالم للرجال ونحن منذ أن بدأت البطوله ندعم قضيه لا تمت للرجال بِصلة ❤️ https://t.co/fl5BPFcMZC	everyone	1	2015-06-17 17:43:28	حساب يهتم بنقل كل ما يحدث حول العالم من أمور تهم المتابع العربي.. للإعلان، تواصل معنا عبر الخاص أو على ScreenMix@PandorasBoxeg.com	[]	[]	[]	Middle East	FALSE	2483601	144	90915	2107	19864	TRUE	615	تصريح للتاريخ : مايكل بالاك أسطورة المانيا كيف نريد الفوز بكأس العالم للرجال ونحن منذ أن بدأت البطوله ندعم قضيه لا تمت للرجال بِصلة	134	{'❤️': 'red heart'}	{'❤️': 1}	1	2	[]	0
1596555328849850369	FALSE	62	147	1276	54	35	0	3331605652	ar	['هيرفي رينارد']	['Person']	[]	[]	['https://twitter.com/ScreenMix/status/1596555328849850369/photo/1', 'https://twitter.com/ScreenMix/status/1596555328849850369/photo/1']	[]	[]	['Sports Event', 'Sports Event', 'Person', 'Sport', 'Sports Team', 'Sports League', 'Sports League', 'Sports League', 'Events [Entity Service]', 'Events [Entity Service]', 'Sports Series', 'Soccer Match', 'Business Taxonomy', 'Coach', 'Unified Twitter Taxonomy', 'Unified Twitter Taxonomy', 'Unified Twitter Taxonomy', 'Unified Twitter Taxonomy', 'Unified Twitter Taxonomy', 'Unified Twitter Taxonom…	['', '', 'Named people in the world like Nelson Mandela', 'Types of sports, like soccer and basketball', 'A sports team organization, like Arsenal and the Boston Celtics', '', '', '', 'Real world events. ', 'Real world events. ', 'A grouping of sports events or series, for example 2014 pre-season, a tournament, or round', 'Sports Event specific to Soccer matches', 'Categories within Brand Vertica…	['2022 FIFA World Cup', 'Poland vs Saudi Arabia', 'Herve Renard', 'Soccer', 'Saudi Arabia', 'International - Soccer', '2022 FIFA World Cup', "FIFA Men's World Cup", '2022 FIFA World Cup', 'Poland vs Saudi Arabia', '2022 FIFA World Cup', 'Poland vs Saudi Arabia', 'Sports & Fitness Business', 'Herve Renard', 'Saudi Arabia', 'Herve Renard', "Men's national soccer teams", 'Sports figures', 'Sports ev…	['', '', '', '', '', '', '', '', '', '', '', '', 'Brands, companies, advertisers and every non-person handle with the profit intent related to sports nutrition, athletic apparel, sports apps, fitness venues', '', '', '', 'National Soccer Teams', '', '', '', '']	TRUE	[]	2022-11-26 17:23:47	TRUE	هيرفي رينارد : اتمنى من مدرب بولندا الإهتمام بنظامه الغذائي بدلًا من الإستنقاص بفريقنا https://t.co/qNWXrT8jAq	everyone	1	2015-06-17 17:43:28	حساب يهتم بنقل كل ما يحدث حول العالم من أمور تهم المتابع العربي.. للإعلان، تواصل معنا عبر الخاص أو على ScreenMix@PandorasBoxeg.com	[]	[]	[]	Middle East	FALSE	2483601	144	90915	2107	19864	TRUE	628	هيرفي رينارد : اتمنى من مدرب بولندا الإهتمام بنظامه الغذائي بدلًا من الإستنقاص بفريقنا	88	{}	{}	0	1	[]	0
1596174389405519874	FALSE	742	333	7289	289	142	0	3331605652	ar	['سالم الدوسري', 'الزمالك', 'كريستيانو رونالدو']	['Person', 'Organization', 'Person']	[]	[]	['https://twitter.com/ScreenMix/status/1596174389405519874/photo/1']	[]	[]	['Person', 'Person', 'Business Taxonomy', 'Athlete', 'Athlete', 'Unified Twitter Taxonomy']	['Named people in the world like Nelson Mandela', 'Named people in the world like Nelson Mandela', 'Categories within Brand Verticals that narrow down the scope of Brands', 'An athlete in the world, like Serena Williams or Lionel Messi', 'An athlete in the world, like Serena Williams or Lionel Messi', 'A taxonomy of user interests. ']	['Shikabala ', 'Cristiano Ronaldo', 'Sports & Fitness Business', 'Shikabala ', 'Cristiano Ronaldo', 'Shikabala ']	['', '', 'Brands, companies, advertisers and every non-person handle with the profit intent related to sports nutrition, athletic apparel, sports apps, fitness venues', '', '', '']	TRUE	[]	2022-11-25 16:10:04	TRUE	سالم الدوسري: هدفي في الأرجنتين أفضل الأهداف في حياتي، ومثلي الأعلى عربيًا هو شيكابالا لاعب الزمالك المصري، وعالميًا كريستيانو رونالدو. https://t.co/AQajsNkEUq	everyone	1	2015-06-17 17:43:28	حساب يهتم بنقل كل ما يحدث حول العالم من أمور تهم المتابع العربي.. للإعلان، تواصل معنا عبر الخاص أو على ScreenMix@PandorasBoxeg.com	[]	[]	[]	Middle East	FALSE	2483601	144	90915	2107	19864	TRUE	631	سالم الدوسري: هدفي في الأرجنتين أفضل الأهداف في حياتي، ومثلي الأعلى عربيًا هو شيكابالا لاعب الزمالك المصري، وعالميًا كريستيانو رونالدو.	137	{}	{}	0	3	['الزمالك']	1
1595132182208864256	FALSE	373	1209	6597	364	354	0	3331605652	ar	[]	[]	[]	[]	['https://twitter.com/ScreenMix/status/1595132182208864256/photo/1']	[]	[]	[]	[]	[]	[]	TRUE	[]	2022-11-22 19:08:43	TRUE	حزن المشجعات الارجنتينيات بعد خسارة منتخبهم اليوم 🥺🥺 https://t.co/vlpOeOtKw3	everyone	1	2015-06-17 17:43:28	حساب يهتم بنقل كل ما يحدث حول العالم من أمور تهم المتابع العربي.. للإعلان، تواصل معنا عبر الخاص أو على ScreenMix@PandorasBoxeg.com	[]	[]	[]	Middle East	FALSE	2483601	144	90915	2107	19864	TRUE	638	حزن المشجعات الارجنتينيات بعد خسارة منتخبهم اليوم	51	{'🥺': 'pleading face'}	{'🥺': 2}	2	0	[]	0
1594663635988762624	FALSE	75	41	880	9	22	0	3331605652	ar	[]	[]	[]	[]	['https://twitter.com/ScreenMix/status/1594663635988762624/photo/1']	[]	[]	[]	[]	[]	[]	TRUE	[]	2022-11-21 12:06:52	TRUE	في مشهد رهيب الطيور المهاجرة تغطي سماء ميلانو الإيطالية مشهد كأنه نهاية العالم 😮 https://t.co/JG4bBCOgnh	everyone	1	2015-06-17 17:43:28	حساب يهتم بنقل كل ما يحدث حول العالم من أمور تهم المتابع العربي.. للإعلان، تواصل معنا عبر الخاص أو على ScreenMix@PandorasBoxeg.com	[]	[]	[]	Middle East	FALSE	2483601	144	90915	2107	19864	TRUE	652	في مشهد رهيب الطيور المهاجرة تغطي سماء ميلانو الإيطالية مشهد كأنه نهاية العالم	80	{'😮': 'face with open mouth'}	{'😮': 1}	1	0	[]	0
1592498785535791104	FALSE	29	56	429	6	5	0	3331605652	ar	[]	[]	[]	[]	['https://twitter.com/ScreenMix/status/1592498785535791104/photo/1', 'https://twitter.com/ScreenMix/status/1592498785535791104/photo/1', 'https://twitter.com/ScreenMix/status/1592498785535791104/photo/1']	[]	[]	['Sports Event', 'Sport', 'Sports Team', 'Sports League', 'Sports League', 'Events [Entity Service]', 'Soccer Match', 'Business Taxonomy', 'Unified Twitter Taxonomy', 'Unified Twitter Taxonomy']	['', 'Types of sports, like soccer and basketball', 'A sports team organization, like Arsenal and the Boston Celtics', '', '', 'Real world events. ', 'Sports Event specific to Soccer matches', 'Categories within Brand Verticals that narrow down the scope of Brands', 'A taxonomy of user interests. ', 'A taxonomy of user interests. ']	['Saudi Arabia vs Croatia', 'Soccer', 'Saudi Arabia', 'International - Soccer', 'Int. Friendly Games', 'Saudi Arabia vs Croatia', 'Saudi Arabia vs Croatia', 'Sports & Fitness Business', 'Saudi Arabia', "Men's national soccer teams"]	['', '', '', '', '', '', '', 'Brands, companies, advertisers and every non-person handle with the profit intent related to sports nutrition, athletic apparel, sports apps, fitness venues', '', 'National Soccer Teams']	TRUE	[]	2022-11-15 12:44:32	TRUE	طائرة المنتخب السعودي المتجهة لكأس العالم 💚🇸🇦 https://t.co/ocVhns1HHw	everyone	1	2015-06-17 17:43:28	حساب يهتم بنقل كل ما يحدث حول العالم من أمور تهم المتابع العربي.. للإعلان، تواصل معنا عبر الخاص أو على ScreenMix@PandorasBoxeg.com	[]	[]	[]	Middle East	FALSE	2483601	144	90915	2107	19864	TRUE	659	طائرة المنتخب السعودي المتجهة لكأس العالم	43	{'💚': 'green heart', '🇸🇦': 'flag: Saudi Arabia'}	{'💚': 1, '🇸🇦': 1}	2	0	[]	0
1589668179365986305	FALSE	208	175	3109	68	40	0	3331605652	ar	[]	[]	[]	[]	['https://twitter.com/ScreenMix/status/1589668179365986305/photo/1']	[]	[]	[]	[]	[]	[]	TRUE	[]	2022-11-07 17:16:43	TRUE	عاااجل : أخبار متداولة لإعتناق الأسطورة الايفواريه ديديه دروجبا الإسلام 🙏❤️ https://t.co/4P878tHy3l	everyone	1	2015-06-17 17:43:28	حساب يهتم بنقل كل ما يحدث حول العالم من أمور تهم المتابع العربي.. للإعلان، تواصل معنا عبر الخاص أو على ScreenMix@PandorasBoxeg.com	[]	[]	[]	Middle East	FALSE	2483601	144	90915	2107	19864	TRUE	673	عاااجل : أخبار متداولة لإعتناق الأسطورة الايفواريه ديديه دروجبا الإسلام	74	{'🙏': 'folded hands', '❤️': 'red heart'}	{'🙏': 1, '❤️': 1}	2	0	[]	0
1584523136132784128	FALSE	613	1188	7089	645	1123	0	3331605652	ar	[]	[]	[]	[]	['https://twitter.com/ronin19217435/status/1583876627611914242/video/1']	[]	[]	['Business Taxonomy']	['Categories within Brand Verticals that narrow down the scope of Brands']	['Food & Beverage Business']	['Brands, companies, advertisers and every non-person handle with the profit intent and related to foods & beverages such as snacks, soft drinks, beers.']	TRUE	[]	2022-10-24 12:32:09	FALSE	مقطع نال انتشار رهيب في وقت قصير يتم الزعم فيه أنه يقال بأن هناك تنين حقيقي تم اكتشافه في مانغوليا 😳🐉 https://t.co/SrYzEBb5UT	everyone	1	2015-06-17 17:43:28	حساب يهتم بنقل كل ما يحدث حول العالم من أمور تهم المتابع العربي.. للإعلان، تواصل معنا عبر الخاص أو على ScreenMix@PandorasBoxeg.com	[]	[]	[]	Middle East	FALSE	2483601	144	90915	2107	19864	TRUE	691	مقطع نال انتشار رهيب في وقت قصير يتم الزعم فيه أنه يقال بأن هناك تنين حقيقي تم اكتشافه في مانغوليا	100	{'🐉': 'dragon', '😳': 'flushed face'}	{'🐉': 1, '😳': 1}	2	0	[]	0
1583116095682097153	FALSE	548	471	4422	432	678	0	3331605652	ar	[]	[]	[]	[]	['https://twitter.com/UOldguy/status/1582462948500701185/video/1']	[]	[]	['Business Taxonomy']	['Categories within Brand Verticals that narrow down the scope of Brands']	['Gaming Business']	['Brands, companies, advertisers and every non-person handle with the profit intent related to offline and online games such as gaming consoles, tabletop games, video game publishers']	TRUE	[]	2022-10-20 15:21:04	TRUE	سائق لا تتمنى الركوب معه https://t.co/YjD9luLalw	everyone	1	2015-06-17 17:43:28	حساب يهتم بنقل كل ما يحدث حول العالم من أمور تهم المتابع العربي.. للإعلان، تواصل معنا عبر الخاص أو على ScreenMix@PandorasBoxeg.com	[]	[]	[]	Middle East	FALSE	2483601	144	90915	2107	19864	TRUE	708	سائق لا تتمنى الركوب معه	25	{}	{}	0	0	[]	0
1568553677538971648	FALSE	249	132	2721	32	100	0	3331605652	ar	[]	[]	[]	[]	['https://twitter.com/kradelljasmine/status/1568097199740919808/video/1']	[]	[]	[]	[]	[]	[]	TRUE	[]	2022-09-10 10:55:13	TRUE	مقطع متداول لمنظر مهيب لعاصفة في السماء ! https://t.co/gsMN2V5Awx	everyone	1	2015-06-17 17:43:28	حساب يهتم بنقل كل ما يحدث حول العالم من أمور تهم المتابع العربي.. للإعلان، تواصل معنا عبر الخاص أو على ScreenMix@PandorasBoxeg.com	[]	[]	[]	Middle East	FALSE	2483601	144	90915	2107	19864	TRUE	837	مقطع متداول لمنظر مهيب لعاصفة في السماء	43	{}	{}	0	0	[]	0
1567475594618699779	FALSE	111	194	1493	53	75	0	3331605652	ar	[]	[]	[]	[]	['https://twitter.com/overtime/status/1567198604141494274/video/1']	[]	[]	[]	[]	[]	[]	TRUE	[]	2022-09-07 11:31:18	TRUE	سيدة تسرق السماعة من شخص بكل هدوء واحترافيه ! 🤯 https://t.co/sanpMyNiS3	everyone	1	2015-06-17 17:43:28	حساب يهتم بنقل كل ما يحدث حول العالم من أمور تهم المتابع العربي.. للإعلان، تواصل معنا عبر الخاص أو على ScreenMix@PandorasBoxeg.com	[]	[]	[]	Middle East	FALSE	2483601	144	90915	2107	19864	TRUE	847	سيدة تسرق السماعة من شخص بكل هدوء واحترافيه	46	{'🤯': 'exploding head'}	{'🤯': 1}	1	0	[]	0
1557321237914845184	FALSE	63	173	1116	15	27	0	3331605652	ar	['محمد القحطاني', 'مصر']	['Person', 'Place']	[]	[]	['https://twitter.com/ScreenMix/status/1557321237914845184/photo/1']	[]	[]	[]	[]	[]	[]	TRUE	[]	2022-08-10 11:01:31	TRUE	عاجل : وفاة رجل الأعمال السعودي محمد القحطاني فجأة خلال حديثه بأحد المؤتمرات في مصر https://t.co/dbadquIedE	everyone	0	2015-06-17 17:43:28	حساب يهتم بنقل كل ما يحدث حول العالم من أمور تهم المتابع العربي.. للإعلان، تواصل معنا عبر الخاص أو على ScreenMix@PandorasBoxeg.com	[]	[]	[]	Middle East	FALSE	2483601	144	90915	2107	19864	TRUE	880	عاجل : وفاة رجل الأعمال السعودي محمد القحطاني فجأة خلال حديثه بأحد المؤتمرات في مصر	85	{}	{}	0	2	[]	0
1693591903369900133	FALSE	48	7	383	5	2	10695	942352216240861184	ar	[]	[]	['المصرية', 'الضبعة', 'تحيا_مصر']	[]	['https://twitter.com/Esll7970Gladii/status/1693591903369900133/photo/1']	[]	[]	[]	[]	[]	[]	TRUE	[]	2023-08-21 11:52:29	FALSE	- هيئة الطاقة الذرية #المصرية 🇪🇬 عن الانتهاء من صب أساسات مبنى الجزيرة النووية للمفاعل الأول لمحطة #الضبعة النووية بقدرة 1400 ميغاوات، ومن المتوقع تركيب مصيدة قلب المفاعل الأول، في السادس من أكتوبر المقبل .. #تحيا_مصر✌️🇪🇬 https://t.co/ESHKcQpxy6	everyone	0	2017-12-17 11:14:11	مدون ومهتم بكل اخبار بلدي مصر الحبيبه❤️Egypt is my life🇪🇬Just be your self!! #sport⚽️ @realmadrid @alahly للإعلانات "الخاص DM"	[]	['sport']	[]	New Jersey, USA	FALSE	221870	2911	52627	167	203196	FALSE	38	هيئة الطاقة الذرية المصرية عن الانتهاء من صب أساسات مبنى الجزيرة النووية للمفاعل الأول لمحطة الضبعة النووية بقدرة 1400 ميغاوات، ومن المتوقع تركيب مصيدة قلب المفاعل الأول، في السادس من أكتوبر المقبل .. تحيا مصر	213	{'🇪🇬': 'flag: Egypt', '✌️': 'victory hand'}	{'🇪🇬': 2, '✌️': 1}	3	0	[]	0
1587538553193603079	FALSE	105	68	1014	24	5	0	942352216240861184	ar	['مصر']	['Place']	['شرم_الشيخ']	[]	['https://twitter.com/Esll7970Gladii/status/1587538553193603079/photo/1']	[]	[]	['Business Taxonomy', 'Entities [Entity Service]', 'Interests and Hobbies']	['Categories within Brand Verticals that narrow down the scope of Brands', 'Entity Service top level domain, every item that is in Entity Service should be in this domain', 'Interests, opinions, and behaviors of individuals, groups, or cultures; like Speciality Cooking or Theme Parks']	['Travel & Transportation Business', 'Travel', 'Travel Actions']	['Brands, companies, advertisers and every non-person handle with the profit intent related to travel as airlines, travel agencies, hotels', 'Travel', 'This entity includes all conversations about travel and vacation.']	TRUE	[]	2022-11-01 20:14:20	FALSE	- لقطه من مطار #شرم_الشيخ لتواجد كثيف من السياح في أجواء سيناء الرائعه بـ مصر، ووصول 17 الف سائح علي متن 115 رحلة طيران اوروبيه ..❤️✌️🇪🇬 https://t.co/iCEBVif1LE	everyone	1	2017-12-17 11:14:11	مدون ومهتم بكل اخبار بلدي مصر الحبيبه❤️Egypt is my life🇪🇬Just be your self!! #sport⚽️ @realmadrid @alahly للإعلانات "الخاص DM"	[]	['sport']	[]	New Jersey, USA	FALSE	221870	2911	52627	167	203196	FALSE	679	لقطه من مطار شرم الشيخ لتواجد كثيف من السياح في أجواء سيناء الرائعه بـ مصر، ووصول 17 الف سائح علي متن 115 رحلة طيران اوروبيه ..	129	{'❤️': 'red heart', '🇪🇬': 'flag: Egypt', '✌️': 'victory hand'}	{'❤️': 1, '🇪🇬': 1, '✌️': 1}	3	1	[]	0
1694627949989826698	FALSE	30	60	67	3	0	56634	824305294146764800	ar	['النصر', 'الدحيل القطري']	['Organization', 'Organization']	['دوري_ابطال_اسيا', 'قرعه_دوري_ابطال_اسيا', 'CristianoRonaldo', 'CR7𓃵', 'رونالدو_نصراوي', 'Ronaldo']	[]	['https://twitter.com/xx76668329/status/1694627792682471882/video/1']	[]	[]	['Person', 'Sports League', 'Business Taxonomy', 'Business Taxonomy', 'Athlete', 'Unified Twitter Taxonomy', 'Unified Twitter Taxonomy', 'Unified Twitter Taxonomy', 'Unified Twitter Taxonomy']	['Named people in the world like Nelson Mandela', '', 'Categories within Brand Verticals that narrow down the scope of Brands', 'Categories within Brand Verticals that narrow down the scope of Brands', 'An athlete in the world, like Serena Williams or Lionel Messi', 'A taxonomy of user interests. ', 'A taxonomy of user interests. ', 'A taxonomy of user interests. ', 'A taxonomy of user interests.…	['Cristiano Ronaldo', 'AFC Champions League', 'Gaming Business', 'Sports & Fitness Business', 'Cristiano Ronaldo', 'AFC Champions League', 'Soccer', 'Cristiano Ronaldo', 'Sports']	['', '', 'Brands, companies, advertisers and every non-person handle with the profit intent related to offline and online games such as gaming consoles, tabletop games, video game publishers', 'Brands, companies, advertisers and every non-person handle with the profit intent related to sports nutrition, athletic apparel, sports apps, fitness venues', '', '', '', '', 'Sports']	TRUE	[]	2023-08-24 08:29:22	TRUE	🚨🚨عاجل : النصر يوجد في المجموعه E مع فريق بورسابوليس الإيراني ومع فريق الدحيل القطري ومع فريق استقلال الايراني #دوري_ابطال_اسيا #قرعه_دوري_ابطال_اسيا #CristianoRonaldo #CR7𓃵 #رونالدو_نصراوي #Ronaldo https://t.co/WOd0ysp1Vf	everyone	1	2017-01-25 17:17:51	تغطيه كل مايخص نادي النصر {أخبار-ملخصات - اهداف - لقطات } 🚨قناتنا في اليوتيوب تحت في الرابط👇🏼حياكم🌹	[]	[]	[]	المملكة العربية السعودية	FALSE	145724	397	16935	595	3646	FALSE	39	عاجل : النصر يوجد في المجموعه مع فريق بورسابوليس الإيراني ومع فريق الدحيل القطري ومع فريق استقلال الايراني دوري ابطال اسيا قرعه دوري ابطال اسيا 7 رونالدو نصراوي	187	{'🚨': 'police car light'}	{'🚨': 2}	2	2	['النصر', 'الدحيل القطري']	2
1694631273312993673	FALSE	16	9	33	1	0	13026	824305294146764800	ar	['النصر', 'بيرسبوليس الإيراني', 'الدحيل القطري', 'النصر السعودي', 'النصر']	['Organization', 'Organization', 'Organization', 'Organization', 'Organization']	['دوري_أبطال_آسيا']	[]	['https://twitter.com/NFCStudio1/status/1694631273312993673/photo/1']	[]	[]	['Sports League', 'Business Taxonomy', 'Business Taxonomy', 'Unified Twitter Taxonomy', 'Unified Twitter Taxonomy', 'Unified Twitter Taxonomy']	['', 'Categories within Brand Verticals that narrow down the scope of Brands', 'Categories within Brand Verticals that narrow down the scope of Brands', 'A taxonomy of user interests. ', 'A taxonomy of user interests. ', 'A taxonomy of user interests. ']	['AFC Champions League', 'Gaming Business', 'Sports & Fitness Business', 'AFC Champions League', 'Soccer', 'Sports']	['', 'Brands, companies, advertisers and every non-person handle with the profit intent related to offline and online games such as gaming consoles, tabletop games, video game publishers', 'Brands, companies, advertisers and every non-person handle with the profit intent related to sports nutrition, athletic apparel, sports apps, fitness venues', '', '', 'Sports']	TRUE	[]	2023-08-24 08:42:34	TRUE	🚨🚨 عاجل| قرعة #دوري_أبطال_آسيا 2023-2024 🏆 - المجموعة الخامسة E اللي فيها نادي النصر : • بيرسبوليس الإيراني • الدحيل القطري • الاستقلال الطاجيكي • النصر السعودي - مارأيك في مجموعة نادي النصر ⁉️🤔 https://t.co/mcW200xcmO	everyone	0	2017-01-25 17:17:51	تغطيه كل مايخص نادي النصر {أخبار-ملخصات - اهداف - لقطات } 🚨قناتنا في اليوتيوب تحت في الرابط👇🏼حياكم🌹	[]	[]	[]	المملكة العربية السعودية	FALSE	145724	397	16935	595	3646	FALSE	39	عاجل قرعة دوري أبطال آسيا 20232024 المجموعة الخامسة اللي فيها نادي النصر : بيرسبوليس الإيراني الدحيل القطري الاستقلال الطاجيكي النصر السعودي مارأيك في مجموعة نادي النصر	186	{'🤔': 'thinking face', '⁉️': 'exclamation question mark', '🏆': 'trophy', '🚨': 'police car light'}	{'🤔': 1, '⁉️': 1, '🏆': 1, '🚨': 2}	5	5	['النصر', 'بيرسبوليس الإيراني', 'الدحيل القطري', 'النصر السعودي', 'النصر']	5
1690459087232774144	FALSE	66	1	146	0	1	14183	824305294146764800	ar	['وكريستيانو']	['Person']	['النصر_الهلال']	[]	['https://twitter.com/NFCStudio1/status/1690459087232774144/video/1']	[]	[]	[]	[]	[]	[]	TRUE	[]	2023-08-12 20:23:48	TRUE	ماني وكريستيانو وفرحتهم بعد اطلاق الحكم صافرة نهاية المباراة مع بعض. #النصر_الهلال https://t.co/HskZi2u9qe	everyone	0	2017-01-25 17:17:51	تغطيه كل مايخص نادي النصر {أخبار-ملخصات - اهداف - لقطات } 🚨قناتنا في اليوتيوب تحت في الرابط👇🏼حياكم🌹	[]	[]	[]	المملكة العربية السعودية	FALSE	145724	397	16935	595	3646	FALSE	75	ماني وكريستيانو وفرحتهم بعد اطلاق الحكم صافرة نهاية المباراة مع بعض. النصر الهلال	83	{}	{}	0	1	[]	0
1694068182997176615	FALSE	1306	511	5339	127	275	831829	1071398002689016064	ar	[]	[]	[]	[]	['https://twitter.com/malkhayareen5/status/1694068182997176615/video/1']	[]	[]	['States']	['States, provinces, or prefectures, like California or Fukushima Prefecture']	['Hawaii']	['Hawaii']	TRUE	[]	2023-08-22 19:25:03	TRUE	بعد اعلان هاواي انها عاصمة المثليين في العالم ، اي مدينة لوط اخرى بعد تلك التي اهلكها الله تعالى ، شاء الله تعالى ان يرسل عليهم ماترون . https://t.co/C0OSgXAIiT	everyone	1	2018-12-08 13:36:04	عضو مجلس رابطة قطر للقيادات ، مدرب ومحاضر في الادارة والقيادة والتسويق …ديننا اهم مشاريعنا ..( صانع محتوى ) حسابي على الانستغرام 👇	[]	[]	[]	الريان, دولة قطر	FALSE	43363	56	16960	20	15745	FALSE	40	بعد اعلان هاواي انها عاصمة المثليين في العالم ، اي مدينة لوط اخرى بعد تلك التي اهلكها الله تعالى ، شاء الله تعالى ان يرسل عليهم ماترون .	138	{}	{}	0	0	[]	0
1557101096040103936	FALSE	1197	262	5089	132	91	0	1071398002689016064	ar	['أوكرانيا']	['Place']	[]	[]	['https://twitter.com/malkhayareen5/status/1557101096040103936/photo/1']	[]	[]	['Ongoing News Story']	["Ongoing News Stories like 'Brexit'"]	['Russo-Ukrainian conflict']	['']	TRUE	[]	2022-08-09 20:26:45	TRUE	اثيوبيا تتحول من استيراد القمح بنسبة 100٪ الى تصديره بعد تحقيقها الاكتفاء الذاتي، بفضل مخطط بدأ تنفيذه سنة 2018 والدول العربية تنتظر قافلة القمح الآتية من أوكرانيا. https://t.co/l45TnuQIjt	everyone	1	2018-12-08 13:36:04	عضو مجلس رابطة قطر للقيادات ، مدرب ومحاضر في الادارة والقيادة والتسويق …ديننا اهم مشاريعنا ..( صانع محتوى ) حسابي على الانستغرام 👇	[]	[]	[]	الريان, دولة قطر	FALSE	43363	56	16960	20	15745	FALSE	875	اثيوبيا تتحول من استيراد القمح بنسبة 100٪ الى تصديره بعد تحقيقها الاكتفاء الذاتي، بفضل مخطط بدأ تنفيذه سنة 2018 والدول العربية تنتظر قافلة القمح الآتية من أوكرانيا.	166	{}	{}	0	1	[]	0
1693596696410808611	FALSE	70	115	1183	46	247	1858426	579225530	ar	['ريال مدريد']	['Organization']	[]	[]	['https://twitter.com/3zozing/status/1693596696410808611/video/1', 'https://twitter.com/3zozing/status/1693596696410808611/video/1']	[]	[]	['Person', 'Sport', 'Business Taxonomy', 'Athlete', 'Person', 'Sport', 'Sports Team', 'Athlete', 'Unified Twitter Taxonomy', 'Unified Twitter Taxonomy', 'Unified Twitter Taxonomy', 'Unified Twitter Taxonomy']	['Named people in the world like Nelson Mandela', 'Types of sports, like soccer and basketball', 'Categories within Brand Verticals that narrow down the scope of Brands', 'An athlete in the world, like Serena Williams or Lionel Messi', 'Named people in the world like Nelson Mandela', 'Types of sports, like soccer and basketball', 'A sports team organization, like Arsenal and the Boston Celtics', …	['Kylian Mbappe', 'Soccer', 'Sports & Fitness Business', 'Kylian Mbappe', 'Kylian Mbappe', 'Soccer', 'Real Madrid CF', 'Kylian Mbappe', 'Real Madrid CF', 'Soccer', 'Kylian Mbappe', 'Sports']	['', '', 'Brands, companies, advertisers and every non-person handle with the profit intent related to sports nutrition, athletic apparel, sports apps, fitness venues', '', '', '', '', '', '', '', '', 'Sports']	TRUE	[]	2023-08-21 12:11:32	TRUE	🚨🚨🚨🚨 ظهور اسم كيليان مبابي في غرفة تبديل ملابس ريال مدريد في فيديو مسرب 🤯🤯🤯🤯 https://t.co/qtXJPP08mQ	everyone	1	2012-05-13 19:38:23	ما بين عدستي وقلمي ✍🏻	[]	[]	[]	قطر العز 🇶🇦	FALSE	195106	4511	126059	100	67887	FALSE	41	ظهور اسم كيليان مبابي في غرفة تبديل ملابس ريال مدريد في فيديو مسرب	71	{'🤯': 'exploding head', '🚨': 'police car light'}	{'🤯': 4, '🚨': 4}	8	1	['ريال مدريد']	1
1598857232631812096	FALSE	18	10	62	1	3	0	579225530	ar	['مايكل بالاك', 'المانيا']	['Person', 'Place']	[]	[]	['https://twitter.com/3zozing/status/1598857232631812096/photo/1']	[]	[]	[]	[]	[]	[]	TRUE	[]	2022-12-03 01:50:44	TRUE	🚨 مايكل بالاك أسطورة المانيا كيف نريد الفوز بكأس العالم للرجال ونحن منذ أن بدأت البطوله ندعم قضيه لا تمت للرجال بِصلة https://t.co/eTqREZpUPq	everyone	1	2012-05-13 19:38:23	ما بين عدستي وقلمي ✍🏻	[]	[]	[]	قطر العز 🇶🇦	FALSE	195106	4511	126059	100	67887	FALSE	615	مايكل بالاك أسطورة المانيا كيف نريد الفوز بكأس العالم للرجال ونحن منذ أن بدأت البطوله ندعم قضيه لا تمت للرجال بِصلة	118	{'🚨': 'police car light'}	{'🚨': 1}	1	2	[]	0
1592490180845658114	FALSE	1	0	6	0	0	0	579225530	ar	[]	[]	[]	[]	['https://twitter.com/3zozing/status/1592490180845658114/photo/1']	[]	[]	['Sports Event', 'Sport', 'Sports Team', 'Sports League', 'Sports League', 'Events [Entity Service]', 'Soccer Match', 'Business Taxonomy', 'Unified Twitter Taxonomy', 'Unified Twitter Taxonomy', 'Unified Twitter Taxonomy', 'Unified Twitter Taxonomy']	['', 'Types of sports, like soccer and basketball', 'A sports team organization, like Arsenal and the Boston Celtics', '', '', 'Real world events. ', 'Sports Event specific to Soccer matches', 'Categories within Brand Verticals that narrow down the scope of Brands', 'A taxonomy of user interests. ', 'A taxonomy of user interests. ', 'A taxonomy of user interests. ', 'A taxonomy of user interests.…	['Saudi Arabia vs Croatia', 'Soccer', 'Saudi Arabia', 'International - Soccer', 'Int. Friendly Games', 'Saudi Arabia vs Croatia', 'Saudi Arabia vs Croatia', 'Sports & Fitness Business', 'Saudi Arabia', 'Soccer', 'Sports', "Men's national soccer teams"]	['', '', '', '', '', '', '', 'Brands, companies, advertisers and every non-person handle with the profit intent related to sports nutrition, athletic apparel, sports apps, fitness venues', '', '', 'Sports', 'National Soccer Teams']	TRUE	[]	2022-11-15 12:10:20	TRUE	🚨 طائرة المنتخب السعودي القادمة لقطر 🦅🇸🇦 https://t.co/MAr4IK30QK	everyone	1	2012-05-13 19:38:23	ما بين عدستي وقلمي ✍🏻	[]	[]	[]	قطر العز 🇶🇦	FALSE	195106	4511	126059	100	67887	FALSE	659	طائرة المنتخب السعودي القادمة لقطر	37	{'🦅': 'eagle', '🚨': 'police car light', '🇸🇦': 'flag: Saudi Arabia'}	{'🦅': 1, '🚨': 1, '🇸🇦': 1}	3	0	[]	0
1693610319468175618	FALSE	5	0	33	0	0	1702	1193928377134206976	ar	[]	[]	[]	[]	['https://twitter.com/abdo_Elgni/status/1693610319468175618/photo/1']	[]	[]	[]	[]	[]	[]	TRUE	[]	2023-08-21 13:05:40	TRUE	الجيش يستولي على عدد كبير من الأسلحة غنائم معركة المدرعات التي كانت بحوزة الجنجويد المجرمين https://t.co/0lS9iICH61	everyone	1	2019-11-11 16:28:28	ﺑﺒﻜﻲ ﻋﻠﻴﻚ ﻳﺎ ﻭﻃﻨﻲ ﻭﺑﺘﺤﺴّﺮ ﻣﻦ ﺍﻟﻠﻲ ﺑﺤﺼﻞ ﻟﻴﻚ ﻣﻦ ﺗﺠﺮﻳﺢ ﻭﻣﻦ ﺁﻻﻡ ... ﻋﻠﻰ ﻣﺮ ﺍﻟﻌﺼﻮﺭ ﻣﻦ ﺍﻟﺴﺎﺳﺔ ﻭﺍﻟﺤﻜّﺎﻡ ... ﺑﺒﻜﻲ ﻋﻠﻴﻚ ﺣﺸﺎﻱ ﻣﺤﺮﻭﻕ ﻭﺑﺘﺤﺴّﺮ ﻭﺑﺘﻨﺪّﻡ ...	[]	[]	[]		FALSE	42431	39935	196779	38	124696	FALSE	42	الجيش يستولي على عدد كبير من الأسلحة غنائم معركة المدرعات التي كانت بحوزة الجنجويد المجرمين	92	{}	{}	0	0	[]	0
1697724967733858790	FALSE	46	31	311	3	1	14266	1193928377134206976	ar	[]	[]	[]	[]	['https://twitter.com/abdo_Elgni/status/1697724967733858790/photo/1']	[]	[]	['Business Taxonomy']	['Categories within Brand Verticals that narrow down the scope of Brands']	['Gaming Business']	['Brands, companies, advertisers and every non-person handle with the profit intent related to offline and online games such as gaming consoles, tabletop games, video game publishers']	TRUE	[]	2023-09-01 21:35:49	TRUE	الجيش يضع ارتكازات في بحري الآن مرحلة الارتكازات والخيم 🔥✌👌 https://t.co/AiKXndqZw5	everyone	1	2019-11-11 16:28:28	ﺑﺒﻜﻲ ﻋﻠﻴﻚ ﻳﺎ ﻭﻃﻨﻲ ﻭﺑﺘﺤﺴّﺮ ﻣﻦ ﺍﻟﻠﻲ ﺑﺤﺼﻞ ﻟﻴﻚ ﻣﻦ ﺗﺠﺮﻳﺢ ﻭﻣﻦ ﺁﻻﻡ ... ﻋﻠﻰ ﻣﺮ ﺍﻟﻌﺼﻮﺭ ﻣﻦ ﺍﻟﺴﺎﺳﺔ ﻭﺍﻟﺤﻜّﺎﻡ ... ﺑﺒﻜﻲ ﻋﻠﻴﻚ ﺣﺸﺎﻱ ﻣﺤﺮﻭﻕ ﻭﺑﺘﺤﺴّﺮ ﻭﺑﺘﻨﺪّﻡ ...	[]	[]	[]		FALSE	42431	39935	196779	38	124696	FALSE	6	الجيش يضع ارتكازات في بحري الآن مرحلة الارتكازات والخيم	57	{'✌': 'victory hand', '🔥': 'fire', '👌': 'OK hand'}	{'✌': 1, '🔥': 1, '👌': 1}	3	0	[]	0
1693148148644925742	FALSE	7	6	32	5	5	9014	3071012097	ar	['تركيا']	['Place']	[]	[]	['https://twitter.com/taledasham/status/1693148148644925742/photo/1']	[]	[]	[]	[]	[]	[]	TRUE	[]	2023-08-20 06:29:10	FALSE	تم أمس تداول خبر يفيد بأنه تم إطلاق موقع في تركيا يحمل اسم "السوريون"، حيث يمنح هذا الموقع جوائز لأي شخص يرتكب أعمال عنف تجاه السوريين، سواء بالقتل أو بتشويه أو بإيذاء جسدي، بالإضافة إلى استهداف الأطفال. وتتم عمليات الدفع من خلال البيتكوين، مما يجعلها غير قابلة للمراقبة.⏬ https://t.co/0UQjqX2JGm	everyone	1	2015-03-04 22:29:50	أبو عمر ¦ ربِّ بما أنعمت عليّ فلن أكون ظهيراً للمجرمين	[]	[]	[]	SEO Specialist	FALSE	10332	980	16117	14	32286	FALSE	54	تم أمس تداول خبر يفيد بأنه تم إطلاق موقع في تركيا يحمل اسم السوريون، حيث يمنح هذا الموقع جوائز لأي شخص يرتكب أعمال عنف تجاه السوريين، سواء بالقتل أو بتشويه أو بإيذاء جسدي، بالإضافة إلى استهداف الأطفال. وتتم عمليات الدفع من خلال البيتكوين، مما يجعلها غير قابلة للمراقبة.	270	{'⏬': 'fast down button'}	{'⏬': 1}	1	1	[]	0
1693679079218635186	FALSE	414	183	3720	43	25	279410	1225427364638854912	ar	['الجيفة أنتوني بوتس', 'دنيبروبيتروفسك', 'الأوكرانية']	['Person', 'Place', 'Place']	[]	[]	['https://twitter.com/Su_35m/status/1693679079218635186/photo/1']	[]	[]	[]	[]	[]	[]	TRUE	[]	2023-08-21 17:38:54	TRUE	🚨🚨 مقتل قائد اللواء الأمريكي الجيفة أنتوني بوتس: في هجوم صاروخي روسي على مقر الناتو في مدينة دنيبروبيتروفسك الأوكرانية. https://t.co/0iMDrY3nmr	everyone	1	2020-02-06 14:34:00	https://t.co/AFDXl7My6K الحساب تحت اشراف قانوني	['https://t.me/Su_35m']	[]	[]		FALSE	116148	16	12911	158	15258	FALSE	43	مقتل قائد اللواء الأمريكي الجيفة أنتوني بوتس: في هجوم صاروخي روسي على مقر الناتو في مدينة دنيبروبيتروفسك الأوكرانية.	120	{'🚨': 'police car light'}	{'🚨': 2}	2	3	[]	0
1685566102477156353	FALSE	162	51	1196	14	3	85803	1225427364638854912	ar	['روسيا', 'دنيبروبيتروفسك']	['Place', 'Place']	[]	[]	['https://twitter.com/Su_35m/status/1685566102477156353/photo/1']	[]	[]	[]	[]	[]	[]	TRUE	[]	2023-07-30 08:20:49	TRUE	🚨🚨 صدفة جميلة😎 لقي جنرال بالجيش الأمريكي أنتوني بوتس مصرعه في حادث تحطم طائرة. هذا الحدث صادف في نفس اليوم الذي دمرت روسيا مبنى جهاز الامن الاوكراني في دنيبروبيتروفسك. بوتس اكثر الجنرالات الامريكيين تواجد بأوروبا وسابقا تواجد عدة في اوكرانيا لدعم الجيش ضد سكان دونباس https://t.co/TAjSDqk1HQ	everyone	0	2020-02-06 14:34:00	https://t.co/AFDXl7My6K الحساب تحت اشراف قانوني	['https://t.me/Su_35m']	[]	[]		FALSE	116148	16	12911	158	15258	FALSE	43	صدفة جميلة لقي جنرال بالجيش الأمريكي أنتوني بوتس مصرعه في حادث تحطم طائرة. هذا الحدث صادف في نفس اليوم الذي دمرت روسيا مبنى جهاز الامن الاوكراني في دنيبروبيتروفسك. بوتس اكثر الجنرالات الامريكيين تواجد بأوروبا وسابقا تواجد عدة في اوكرانيا لدعم الجيش ضد سكان دونباس	269	{'😎': 'smiling face with sunglasses', '🚨': 'police car light'}	{'😎': 1, '🚨': 2}	3	2	[]	0
1672364655400869896	FALSE	18	3	269	0	1	35523	1225427364638854912	ar	['بوتين']	['Person']	[]	[]	['https://twitter.com/Su_35m/status/1672364655400869896/video/1']	[]	[]	[]	[]	[]	[]	TRUE	[]	2023-06-23 22:02:59	TRUE	🚨🚨 الرئيس بوتين يتجه إلى الكرملين حاليا ربما نسمع تصريح منه قريبا . https://t.co/RUcgLyI3yo	everyone	1	2020-02-06 14:34:00	https://t.co/AFDXl7My6K الحساب تحت اشراف قانوني	['https://t.me/Su_35m']	[]	[]		FALSE	116148	16	12911	158	15258	FALSE	181	الرئيس بوتين يتجه إلى الكرملين حاليا ربما نسمع تصريح منه قريبا .	67	{'🚨': 'police car light'}	{'🚨': 2}	2	1	[]	0
1641052787822690305	FALSE	39	5	215	0	2	4794	1225427364638854912	ar	[]	[]	[]	[]	['https://twitter.com/dmab97/status/1641052787822690305/video/1']	[]	[]	[]	[]	[]	[]	TRUE	[]	2023-03-29 12:20:48	TRUE	🚨🚨 مواجهة بين رجال الشرطة ورجال الإطفاء الفرنسيين https://t.co/TgjfdQJhlY	everyone	1	2020-02-06 14:34:00	https://t.co/AFDXl7My6K الحساب تحت اشراف قانوني	['https://t.me/Su_35m']	[]	[]		FALSE	116148	16	12911	158	15258	FALSE	406	مواجهة بين رجال الشرطة ورجال الإطفاء الفرنسيين	48	{'🚨': 'police car light'}	{'🚨': 2}	2	0	[]	0
1596421259671359498	FALSE	1	1	6	0	0	0	1225427364638854912	ar	[]	[]	[]	[]	['https://twitter.com/dmab97/status/1596421259671359498/video/1']	[]	[]	[]	[]	[]	[]	TRUE	[]	2022-11-26 08:31:03	TRUE	رتل دبابات روسية من نوع T-80U مموهة تتجه الى منطقة العمليات لون ثلجي 😂😂 https://t.co/vKGyZiKmcp	everyone	1	2020-02-06 14:34:00	https://t.co/AFDXl7My6K الحساب تحت اشراف قانوني	['https://t.me/Su_35m']	[]	[]		FALSE	116148	16	12911	158	15258	FALSE	630	رتل دبابات روسية من نوع 80 مموهة تتجه الى منطقة العمليات لون ثلجي	69	{'😂': 'face with tears of joy'}	{'😂': 2}	2	0	[]	0
1693526759088566662	FALSE	44	108	563	13	10	49934	1179380377951055872	ar	['الخليج العربي', 'لايران', 'العراق', 'وسوريا']	['Place', 'Place', 'Place', 'Place']	['عاجل']	[]	['https://twitter.com/JanabiRasha/status/1693526759088566662/video/1']	[]	[]	[]	[]	[]	[]	TRUE	[]	2023-08-21 07:33:38	TRUE	⭕️ #عاجل مع وصول حاملة الطائرات الامريكيه Uss الى الخليج العربي ..!! الجيش الامريكي يحدد اكثر من 340 موقع مستهدف لمليشيا وفصائل تابعة لايران داخل العراق وسوريا ، منها 95 موقع مهم ونشط للفصائل كمقرات رسمية او مخبأ للاسلحة والعتاد والصواريخ !! https://t.co/vnnrhTEZ2L	everyone	1	2019-10-02 12:59:46	_بغداد... لا أنتِ أنت ولا الديارُ ديارُ. 🇮🇶 _كلامي يمثلني و فهمك يمثلك .. _ مادمت سنداً لِنفسك فلن تُخذل ..	['https://t.me/Su_35m']	[]	[]	🇮🇶	FALSE	6159	1989	19250	11	10887	FALSE	44	عاجل مع وصول حاملة الطائرات الامريكيه الى الخليج العربي .. الجيش الامريكي يحدد اكثر من 340 موقع مستهدف لمليشيا وفصائل تابعة لايران داخل العراق وسوريا ، منها 95 موقع مهم ونشط للفصائل كمقرات رسمية او مخبأ للاسلحة والعتاد والصواريخ	235	{'⭕': 'hollow red circle'}	{'⭕': 1}	1	4	[]	0
1627736258100310016	FALSE	0	0	0	0	0	99	1179380377951055872	ar	[]	[]	[]	[]	['https://twitter.com/JanabiRasha/status/1627736258100310016/video/1']	[]	[]	[]	[]	[]	[]	TRUE	[]	2023-02-20 18:25:40	TRUE	لحظات مرعبة في هاتاي أثناء الزلزال. https://t.co/snYDlB1IqO	everyone	1	2019-10-02 12:59:46	_بغداد... لا أنتِ أنت ولا الديارُ ديارُ. 🇮🇶 _كلامي يمثلني و فهمك يمثلك .. _ مادمت سنداً لِنفسك فلن تُخذل ..	['https://t.me/Su_35m']	[]	[]	🇮🇶	FALSE	6159	1989	19250	11	10887	FALSE	467	لحظات مرعبة في هاتاي أثناء الزلزال.	36	{}	{}	0	0	[]	0
1693603663569400097	FALSE	9	165	121	7	1	44924	1117476076932910976	ar	[]	[]	['كلنا_ضد_الكيزان']	[]	['https://twitter.com/v2EQ6NcmkBPhpq3/status/1693603663569400097/photo/1']	[]	[]	[]	[]	[]	[]	TRUE	[]	2023-08-21 12:39:13	TRUE	ما معنى هذا الكلام؟؟؟ #كلنا_ضد_الكيزان https://t.co/hLA8NAYIVu	everyone	1	2019-04-14 17:13:53	رجل أعمال .... ماجستير إدارة الأعمال (ادارة مشاريع )	['https://t.me/Su_35m']	[]	[]	Malaysia	FALSE	6598	1191	21745	11	33336	FALSE	45	ما معنى هذا الكلام؟؟؟ كلنا ضد الكيزان	38	{}	{}	0	0	[]	0
1693291169202008064	FALSE	238	60	917	6	16	239229	1481905722	ar	['العراق', 'امريكا']	['Place', 'Place']	[]	[]	['https://twitter.com/ALI_7YO/status/1693255726108455034/video/1']	[]	[]	[]	[]	[]	[]	TRUE	[]	2023-08-20 15:57:29	TRUE	⭕️أمريكا تتقدم نحو كافة المدن السنية العراقية والحشد الشيعي في حالة رعب يكتفي بالإنكار وتكذيب المشاهد القادمة من العراق ويقنع الشيعه ان امريكا مستحيل ستنقلب عليهم لأنها من جلبتهم عبر الدبابة الأمريكية ولا يمكنها الإستغناء عن عملائها المرتزقة كما بأفغانستانhttps://t.co/0995lCkdjE	everyone	1	2013-06-04 10:30:31	رئيس موقع #بغداد_بوست @TheBaghdadPostA أعبرعن رأيي .وأغرد خارج سربهم Chairman of @BaghdadPostPlus ,I Tweet What I Want To Say	[]	['بغداد_بوست']	[]	London, England ، Andalusia	FALSE	161357	7772	67933	395	30015	FALSE	46	أمريكا تتقدم نحو كافة المدن السنية العراقية والحشد الشيعي في حالة رعب يكتفي بالإنكار وتكذيب المشاهد القادمة من العراق ويقنع الشيعه ان امريكا مستحيل ستنقلب عليهم لأنها من جلبتهم عبر الدبابة الأمريكية ولا يمكنها الإستغناء عن عملائها المرتزقة كما بأفغانستان	255	{'⭕': 'hollow red circle'}	{'⭕': 1}	1	2	[]	0
1674892410118107136	FALSE	40	13	129	6	3	21978	1481905722	ar	['فرنسا']	['Place']	[]	[]	['https://twitter.com/ConflictTR/status/1674709875677450241/video/1']	[]	[]	[]	[]	[]	[]	TRUE	[]	2023-06-30 21:27:23	TRUE	⭕️فديو متداول امس لماكرون وزوجته يرقصان في حفل صاخب بينما شوارع فرنسا تحترق اليسار الراديكالي اكبر مستفيد من هذه الفوضى https://t.co/HVeqMntNIR	everyone	1	2013-06-04 10:30:31	رئيس موقع #بغداد_بوست @TheBaghdadPostA أعبرعن رأيي .وأغرد خارج سربهم Chairman of @BaghdadPostPlus ,I Tweet What I Want To Say	[]	['بغداد_بوست']	[]	London, England ، Andalusia	FALSE	161357	7772	67933	395	30015	FALSE	160	فديو متداول امس لماكرون وزوجته يرقصان في حفل صاخب بينما شوارع فرنسا تحترق اليسار الراديكالي اكبر مستفيد من هذه الفوضى	120	{'⭕': 'hollow red circle'}	{'⭕': 1}	1	1	[]	0
1644020580994129925	FALSE	32	7	81	1	0	13035	1481905722	ar	['لبنان']	['Place']	['لبنان', 'إسرائيل']	[]	['https://twitter.com/SufianSamarrai/status/1644020580994129925/photo/1']	[]	[]	['Unified Twitter Taxonomy', 'Unified Twitter Taxonomy', 'Unified Twitter Taxonomy']	['A taxonomy of user interests. ', 'A taxonomy of user interests. ', 'A taxonomy of user interests. ']	['Politics', 'Political issues', 'Lebanon Conflict ']	['Politics', 'Political issues', '']	TRUE	[]	2023-04-06 16:53:45	TRUE	🛑تنظيم حماس الإرهابي فرع لبنان الموالي للحرس الثوري الإجرامي ينشر صور وصول إسماعيل هنية الى الجنوب اللبناني وقيادته للضربات الصاروخية من جنوب #لبنان نحو شمال #إسرائيل https://t.co/COHg5cs4pU	everyone	1	2013-06-04 10:30:31	رئيس موقع #بغداد_بوست @TheBaghdadPostA أعبرعن رأيي .وأغرد خارج سربهم Chairman of @BaghdadPostPlus ,I Tweet What I Want To Say	[]	['بغداد_بوست']	[]	London, England ، Andalusia	FALSE	161357	7772	67933	395	30015	FALSE	387	تنظيم حماس الإرهابي فرع لبنان الموالي للحرس الثوري الإجرامي ينشر صور وصول إسماعيل هنية الى الجنوب اللبناني وقيادته للضربات الصاروخية من جنوب لبنان نحو شمال إسرائيل	164	{'🛑': 'stop sign'}	{'🛑': 1}	1	1	[]	0
1594007354596466689	FALSE	63	13	143	4	6	0	1481905722	ar	['خديجة بن قنة', 'السعودية', 'إسرائيل', 'والسعودية']	['Person', 'Place', 'Place', 'Place']	['كأس_العالم_قطر_2022']	[]	['https://twitter.com/barrak2023/status/1593662047094448129/video/1']	[]	[]	[]	[]	[]	[]	TRUE	[]	2022-11-19 16:39:03	TRUE	⭕️جمال ريان يصرخ ومعه خديجة بن قنة تبكي لماذا يا السعودية ترفعون علم إسرائيل في مونديال #كأس_العالم_قطر_2022 بالدوحة بدهاش تزبط يا زلمة 🤡 طبعا عزمي صدع رؤسنا بصفقة القرن والسعودية تسمح بمرور طائرات نحو بن غوريون وبالاخير رفعوا علمهم في عقر وكر عزمي https://t.co/IOHKtZoW61	everyone	1	2013-06-04 10:30:31	رئيس موقع #بغداد_بوست @TheBaghdadPostA أعبرعن رأيي .وأغرد خارج سربهم Chairman of @BaghdadPostPlus ,I Tweet What I Want To Say	[]	['بغداد_بوست']	[]	London, England ، Andalusia	FALSE	161357	7772	67933	395	30015	FALSE	645	جمال ريان يصرخ ومعه خديجة بن قنة تبكي لماذا يا السعودية ترفعون علم إسرائيل في مونديال كأس العالم قطر 2022 بالدوحة بدهاش تزبط يا زلمة طبعا عزمي صدع رؤسنا بصفقة القرن والسعودية تسمح بمرور طائرات نحو بن غوريون وبالاخير رفعوا علمهم في عقر وكر عزمي	250	{'🤡': 'clown face', '⭕': 'hollow red circle'}	{'🤡': 1, '⭕': 1}	2	4	[]	0
1693565837376995376	FALSE	89	323	627	19	19	89134	2181251582	ar	['العراق', 'العراق']	['Place', 'Place']	['الا_طحين']	[]	['https://twitter.com/linaassil_assil/status/1693565837376995376/video/1']	[]	[]	['Person', 'Politician', 'Unified Twitter Taxonomy', 'Unified Twitter Taxonomy', 'Unified Twitter Taxonomy']	['Named people in the world like Nelson Mandela', 'Politicians in the world, like Joe Biden', 'A taxonomy of user interests. ', 'A taxonomy of user interests. ', 'A taxonomy of user interests. ']	['Joe Biden', 'Joe Biden', 'Joe Biden', 'Politics', 'Political figures']	['US President Joe Biden', 'US President Joe Biden', 'US President Joe Biden', 'Politics', 'Politician']	TRUE	[]	2023-08-21 10:08:55	TRUE	خطاب الرئيس الامريكي جو بايدن امس: "نحن قادمون لطرد الميليشيات الارهابيه الوقحه التي تدمر سيادة وشعب العراق نحن قادمون لتحرير البلاد،سنطرد هذه الفصائل والعصابات المسلحه من العراق اعداؤنا ،نعم سنفعل ذلك ونحن باقصى درجات الاستعداد" هل سمعتم يا ذيول اير١ن؟؟ فأين المفر؟؟ #الا_طحين https://t.co/EJlo4whWbN	everyone	1	2013-11-08 01:54:46	عراقيه حره .. ولا مقدس عندي سوى العراق 🇮🇶 لا اساوم على العراق ولن اقبل اي اضافه لأي ولائي الخاص مهمل ...	[]	['بغداد_بوست']	[]	Iraq	FALSE	24860	12505	27448	4	20519	FALSE	47	خطاب الرئيس الامريكي جو بايدن امس: نحن قادمون لطرد الميليشيات الارهابيه الوقحه التي تدمر سيادة وشعب العراق نحن قادمون لتحرير البلاد،سنطرد هذه الفصائل والعصابات المسلحه من العراق اعداؤنا ،نعم سنفعل ذلك ونحن باقصى درجات الاستعداد هل سمعتم يا ذيول اير١ن؟؟ فأين المفر؟؟ الا طحين	276	{}	{}	0	2	[]	0
1684334355055779841	FALSE	40	60	223	9	2	24238	2181251582	ar	['النرويج']	['Place']	[]	[]	['https://twitter.com/linaassil_assil/status/1684334355055779841/video/1']	[]	[]	[]	[]	[]	[]	TRUE	[]	2023-07-26 22:46:18	TRUE	اللحظات الأولى لمحاولة نرويجي متطرف حرق نسخة من المصحف الشريف، وهجوم شاب عراقي الجنسية عليه ردا على جريمته. كفو من ابو الغيرة العراقيه✌️🇮🇶 وين المسلمين في النرويج؟؟ واقفين يتفرجون على هذا الزنيم حين بدأ بحرق المصحف الشريف ولم تأخذهم الغيرة على القرآن؟! حرق المصحف ..لماذا ؟!؟ https://t.co/1kILeNd6g0	everyone	1	2013-11-08 01:54:46	عراقيه حره .. ولا مقدس عندي سوى العراق 🇮🇶 لا اساوم على العراق ولن اقبل اي اضافه لأي ولائي الخاص مهمل ...	[]	['بغداد_بوست']	[]	Iraq	FALSE	24860	12505	27448	4	20519	FALSE	103	اللحظات الأولى لمحاولة نرويجي متطرف حرق نسخة من المصحف الشريف، وهجوم شاب عراقي الجنسية عليه ردا على جريمته. كفو من ابو الغيرة العراقيه وين المسلمين في النرويج؟؟ واقفين يتفرجون على هذا الزنيم حين بدأ بحرق المصحف الشريف ولم تأخذهم الغيرة على القرآن؟ حرق المصحف ..لماذا ؟؟	273	{'🇮🇶': 'flag: Iraq', '✌️': 'victory hand'}	{'🇮🇶': 1, '✌️': 1}	2	1	[]	0
1663259230600609810	FALSE	8	9	41	0	1	5661	2181251582	ar	['إيران']	['Place']	[]	[]	['https://twitter.com/linaassil_assil/status/1663259230600609810/video/1', 'https://twitter.com/linaassil_assil/status/1663259230600609810/video/1', 'https://twitter.com/linaassil_assil/status/1663259230600609810/video/1', 'https://twitter.com/linaassil_assil/status/1663259230600609810/video/1']	[]	[]	[]	[]	[]	[]	TRUE	[]	2023-05-29 19:01:17	TRUE	بعد يوم من المعارك بين طالبان والحرس الث🐃وري الايراني ودخول طالبان بالمدرعات على الموقع الايرانيه وهروب الحرس تاركين اسلحتهم ،وأسر عدد من الجنود الايرانيين!! اليوم الافغان زحفو نحو الحدود الايرانيه مع استمرارهم نقل التعزيزات العسكرية إلى الحدود مع إيران! يارب..اجعل بأسهم بينهم https://t.co/nvwZGp16I9	everyone	1	2013-11-08 01:54:46	عراقيه حره .. ولا مقدس عندي سوى العراق 🇮🇶 لا اساوم على العراق ولن اقبل اي اضافه لأي ولائي الخاص مهمل ...	[]	['بغداد_بوست']	[]	Iraq	FALSE	24860	12505	27448	4	20519	FALSE	252	بعد يوم من المعارك بين طالبان والحرس الثوري الايراني ودخول طالبان بالمدرعات على الموقع الايرانيه وهروب الحرس تاركين اسلحتهم ،وأسر عدد من الجنود الايرانيين اليوم الافغان زحفو نحو الحدود الايرانيه مع استمرارهم نقل التعزيزات العسكرية إلى الحدود مع إيران يارب..اجعل بأسهم بينهم	274	{'🐃': 'water buffalo'}	{'🐃': 1}	1	1	[]	0
1662783655780007943	FALSE	6	9	37	1	0	2399	2181251582	ar	['إيران']	['Place']	['عااااجل', 'كباب_الحدود', 'طالبان']	[]	['https://twitter.com/linaassil_assil/status/1662783655780007943/video/1', 'https://twitter.com/linaassil_assil/status/1662783655780007943/video/1']	[]	[]	['Unified Twitter Taxonomy', 'Sports Event', 'Events [Entity Service]', 'Cricket Match']	['A taxonomy of user interests. ', '', 'Real world events. ', 'Sports Event specific to Cricket matches']	['Crisis in Afghanistan', 'Chennai Super Kings vs Lucknow Super Giants', 'Chennai Super Kings vs Lucknow Super Giants', 'Chennai Super Kings vs Lucknow Super Giants']	['', '', '', '']	TRUE	[]	2023-05-28 11:31:31	TRUE	#عااااجل .. جنود طالبان تدمر ما مجموعه 18 منشأة حدودية إيرانية كان الحرس الث🐃وري قد نفذ هجمات إرهابية من هذه البؤر الاستيطانيه الضخمه . إيران لم تقم بمقاومة قوية حتى الآن بل اكتفت بإنتشال جثث قتلاها من تحت انقاض المراكز التي دمرتها قذائف طالبان👊 #كباب_الحدود #طالبان https://t.co/sIyqzMBbkt	everyone	1	2013-11-08 01:54:46	عراقيه حره .. ولا مقدس عندي سوى العراق 🇮🇶 لا اساوم على العراق ولن اقبل اي اضافه لأي ولائي الخاص مهمل ...	[]	['بغداد_بوست']	[]	Iraq	FALSE	24860	12505	27448	4	20519	FALSE	269	عااااجل .. جنود طالبان تدمر ما مجموعه 18 منشأة حدودية إيرانية كان الحرس الثوري قد نفذ هجمات إرهابية من هذه البؤر الاستيطانيه الضخمه . إيران لم تقم بمقاومة قوية حتى الآن بل اكتفت بإنتشال جثث قتلاها من تحت انقاض المراكز التي دمرتها قذائف طالبان كباب الحدود طالبان	267	{'🐃': 'water buffalo', '👊': 'oncoming fist'}	{'🐃': 1, '👊': 1}	2	1	[]	0
1644090157430104065	FALSE	13	17	79	1	0	4092	2181251582	ar	['لبنان', 'ايران', 'لبنان', 'لبنان', 'لبنان', 'بغداد']	['Place', 'Place', 'Place', 'Place', 'Place', 'Place']	[]	[]	['https://twitter.com/linaassil_assil/status/1644090157430104065/video/1']	[]	[]	['Unified Twitter Taxonomy', 'Unified Twitter Taxonomy', 'Unified Twitter Taxonomy']	['A taxonomy of user interests. ', 'A taxonomy of user interests. ', 'A taxonomy of user interests. ']	['Politics', 'Political issues', 'Lebanon Conflict ']	['Politics', 'Political issues', '']	TRUE	[]	2023-04-06 21:30:13	TRUE	مصدر لبناني: هروب قيادات حزب الله من لبنان الى ايران!! وحالة هروب جماعي لأتباع حزباله من جنوب لبنان الى مناطق الشمال بعد التهديدات الإسرائيليه بقصف لبنان!! وبايدن يؤيد قرار الصهاينه بقصف جنوب لبنان!! تخيل السفاره على بعد أمتار من مقرات المقاوله في بغداد وحتى بحصوايه ماضربوها!! https://t.co/HVcGFcARDH	everyone	1	2013-11-08 01:54:46	عراقيه حره .. ولا مقدس عندي سوى العراق 🇮🇶 لا اساوم على العراق ولن اقبل اي اضافه لأي ولائي الخاص مهمل ...	[]	['بغداد_بوست']	[]	Iraq	FALSE	24860	12505	27448	4	20519	FALSE	383	مصدر لبناني: هروب قيادات حزب الله من لبنان الى ايران وحالة هروب جماعي لأتباع حزباله من جنوب لبنان الى مناطق الشمال بعد التهديدات الإسرائيليه بقصف لبنان وبايدن يؤيد قرار الصهاينه بقصف جنوب لبنان تخيل السفاره على بعد أمتار من مقرات المقاوله في بغداد وحتى بحصوايه ماضربوها	272	{}	{}	0	6	[]	0
1692986173365338186	FALSE	7	31	53	1	0	3192	3363833139	ar	['خليج', 'بجاية', 'جيجل']	['Place', 'Place', 'Place']	[]	[]	['https://twitter.com/yytahar/status/1692986173365338186/photo/1']	[]	[]	['Interests and Hobbies Category']	['A grouping of interests and hobbies entities, like Novelty Food or Destinations']	['Design']	['Design']	TRUE	[]	2023-08-19 19:45:32	TRUE	مهندسون من بجاية يقترحون مجددا طريق خليج بجاية جيجل و تصميم ولا اروع اختصار زمن و المسافة و طريق سياحي. فكرة المشروع طُرحت سنة 2011 على مستوى البرلمان من قبل اكثر من 20 نائب إسلامي و حسب النظام الداخلي البرلمان المشروع مقبول لكن المعارضة الفاشلة سياسيا افشلت تمرير المشروع ... https://t.co/8xGkEkqDy2	everyone	1	2015-07-07 09:18:29	أنا جزائري عربي ولي كامل الحق في بلدي ومن يعترض على هويتي الجزائرية العربية فليذهب لتبليط المحيط ويقدم شكواه لفرنسا والاتحاد الاوروبي	[]	['بغداد_بوست']	[]	تلمسان	FALSE	3312	971	40636	0	54819	FALSE	48	مهندسون من بجاية يقترحون مجددا طريق خليج بجاية جيجل و تصميم ولا اروع اختصار زمن و المسافة و طريق سياحي. فكرة المشروع طُرحت سنة 2011 على مستوى البرلمان من قبل اكثر من 20 نائب إسلامي و حسب النظام الداخلي البرلمان المشروع مقبول لكن المعارضة الفاشلة سياسيا افشلت تمرير المشروع ...	278	{}	{}	0	3	[]	0
1658765234125905921	FALSE	1	1	4	0	0	116	3363833139	ar	['دانيال باديسلاف', 'دينامو']	['Person', 'Organization']	[]	[]	['https://twitter.com/yytahar/status/1658765234125905921/photo/1']	[]	[]	[]	[]	[]	[]	TRUE	[]	2023-05-17 09:23:44	TRUE	اسمه "دانيال باديسلاف" وهو حارس مرمى روماني يصل وزنه إلى 130 كلغ، و تسبب في نزول ناديه "دينامو سبختفيتا" من الدرجة الثانية الى الدرجة الرابعة والنادي عجز عن طرده لانه أمه أحد ملاك و ممولي النادي. كم من دانيال في محيطكم 🙄 وكم من ناجح ضاع مستقبله بسبب انموذج دانيال🤔 https://t.co/Px0t5dslvk	everyone	1	2015-07-07 09:18:29	أنا جزائري عربي ولي كامل الحق في بلدي ومن يعترض على هويتي الجزائرية العربية فليذهب لتبليط المحيط ويقدم شكواه لفرنسا والاتحاد الاوروبي	[]	['بغداد_بوست']	[]	تلمسان	FALSE	3312	971	40636	0	54819	FALSE	310	اسمه دانيال باديسلاف وهو حارس مرمى روماني يصل وزنه إلى 130 كلغ، و تسبب في نزول ناديه دينامو سبختفيتا من الدرجة الثانية الى الدرجة الرابعة والنادي عجز عن طرده لانه أمه أحد ملاك و ممولي النادي. كم من دانيال في محيطكم وكم من ناجح ضاع مستقبله بسبب انموذج دانيال	263	{'🤔': 'thinking face', '🙄': 'face with rolling eyes'}	{'🤔': 1, '🙄': 1}	2	2	['دينامو']	1
1692476026842993073	FALSE	351	54	1160	27	32	62802	1248898481231625984	ar	['فرنسا', 'باريس']	['Place', 'Place']	[]	[]	['https://twitter.com/go2islam/status/1692476026842993073/video/1']	[]	[]	[]	[]	[]	[]	TRUE	[]	2023-08-18 09:58:24	TRUE	💢 فرنسا - ظلام .. بدأ ترشيد استهلاك الكهرباء في باريس بسبب وقف النيجر تصدير اليورانيوم لفرنسا من أجل محطات الطاقة النووية😉 https://t.co/i01ZiFKXkg	everyone	1	2020-04-11 09:02:15	{قَالَ اللَّهُ هَذَا يَوْمُ يَنْفَعُ الصَّادِقِينَ صِدْقُهُمْ لَهُمْ جَنَّاتٌ تَجْرِي مِنْ تَحْتِهَا الْأَنْهَارُ خَالِدِينَ فِيهَا أَبَدًا }	[]	['بغداد_بوست']	[]		FALSE	46195	1657	62063	93	83481	FALSE	49	فرنسا ظلام .. بدأ ترشيد استهلاك الكهرباء في باريس بسبب وقف النيجر تصدير اليورانيوم لفرنسا من أجل محطات الطاقة النووية	120	{'😉': 'winking face', '💢': 'anger symbol'}	{'😉': 1, '💢': 1}	2	2	[]	0
1636013717216190464	FALSE	5	0	28	0	0	2974	1248898481231625984	ar	['تركيا']	['Place']	[]	[]	['https://twitter.com/go2islam/status/1636013717216190464/video/1']	[]	[]	[]	[]	[]	[]	TRUE	[]	2023-03-15 14:37:20	TRUE	💢 تركيا - فيضانات بمدينة شانلي اورفا..ربنا يكون معهم وفي عونهم ويرفع عنهم البلاء والعذاب بإذن الله 🤲 https://t.co/rGRo2vZZk2	everyone	0	2020-04-11 09:02:15	{قَالَ اللَّهُ هَذَا يَوْمُ يَنْفَعُ الصَّادِقِينَ صِدْقُهُمْ لَهُمْ جَنَّاتٌ تَجْرِي مِنْ تَحْتِهَا الْأَنْهَارُ خَالِدِينَ فِيهَا أَبَدًا }	[]	['بغداد_بوست']	[]		FALSE	46195	1657	62063	93	83481	FALSE	207	تركيا فيضانات بمدينة شانلي اورفا..ربنا يكون معهم وفي عونهم ويرفع عنهم البلاء والعذاب بإذن الله	100	{'🤲': 'palms up together', '💢': 'anger symbol'}	{'🤲': 1, '💢': 1}	2	1	[]	0
1693212521107210274	FALSE	377	757	1473	76	55	212259	806823188361572352	ar	[]	[]	[]	[]	['https://twitter.com/UfWwp/status/1693212521107210274/video/1']	[]	[]	[]	[]	[]	[]	TRUE	[]	2023-08-20 10:44:58	TRUE	ما ارتكبه القضاء السعودي باعدام شاب سعودي شيعي كونه قام بعمل موكب حسيني جريمة وامه تودعه وتتالم ألا لعنة الله على الاسلام الوهابي https://t.co/Iy8WiEEjjB	everyone	1	2016-12-08 11:30:12	النقد وسيلة للارتقاء لا النقد الحاقد او الحاسد ربما نختلف ولكن لا نصنع من اختلافنا خلاف	[]	['بغداد_بوست']	[]	Iraq	FALSE	21677	350	23881	21	23395	FALSE	50	ما ارتكبه القضاء السعودي باعدام شاب سعودي شيعي كونه قام بعمل موكب حسيني جريمة وامه تودعه وتتالم ألا لعنة الله على الاسلام الوهابي	130	{}	{}	0	0	[]	0
1692904591396880406	FALSE	427	278	755	8	20	363941	2553262080	ar	['نيمار', 'الرياض']	['Person', 'Place']	[]	[]	['https://twitter.com/MBk6g/status/1692904591396880406/photo/1', 'https://twitter.com/MBk6g/status/1692904591396880406/photo/1', 'https://twitter.com/MBk6g/status/1692904591396880406/photo/1']	[]	[]	['Person', 'Business Taxonomy', 'Athlete', 'Unified Twitter Taxonomy', 'Unified Twitter Taxonomy', 'Unified Twitter Taxonomy']	['Named people in the world like Nelson Mandela', 'Categories within Brand Verticals that narrow down the scope of Brands', 'An athlete in the world, like Serena Williams or Lionel Messi', 'A taxonomy of user interests. ', 'A taxonomy of user interests. ', 'A taxonomy of user interests. ']	['Neymar ', 'Sports & Fitness Business', 'Neymar ', 'Soccer', 'Neymar ', 'Sports']	['', 'Brands, companies, advertisers and every non-person handle with the profit intent related to sports nutrition, athletic apparel, sports apps, fitness venues', '', '', '', 'Sports']	TRUE	[]	2023-08-19 14:21:21	TRUE	🚨والدة نيمار في الرياض عند الإبل https://t.co/WNa0ZdKi8E	everyone	1	2014-06-07 20:49:21	هنا الإعلام الجديد مصدرك الأول لأهم الأخبار المنوعة الخاص للاعلانات فقط	[]	['بغداد_بوست']	[]	المملكة العربية السعودية	FALSE	598393	116	32807	371	2254	FALSE	51	والدة نيمار في الرياض عند الإبل	32	{'🚨': 'police car light'}	{'🚨': 1}	1	2	[]	0
1681366124246577154	FALSE	649	1169	1605	46	180	1805911	2553262080	ar	[]	[]	[]	[]	['https://twitter.com/vdeoo0/status/1681008863548416000/video/1']	[]	[]	[]	[]	[]	[]	TRUE	[]	2023-07-18 18:11:36	TRUE	🛑 شرطي بريطاني يقوم ب اطلاق النار على سيدة ويرديها https://t.co/9z8zKaovYn	everyone	1	2014-06-07 20:49:21	هنا الإعلام الجديد مصدرك الأول لأهم الأخبار المنوعة الخاص للاعلانات فقط	[]	['بغداد_بوست']	[]	المملكة العربية السعودية	FALSE	598393	116	32807	371	2254	FALSE	122	شرطي بريطاني يقوم ب اطلاق النار على سيدة ويرديها	53	{'🛑': 'stop sign'}	{'🛑': 1}	1	0	[]	0
1686475259619254273	FALSE	440	615	1263	12	29	679940	2553262080	ar	['اسطنبول']	['Place']	[]	[]	['https://twitter.com/vdeoo0/status/1686282259672764416/video/1']	[]	[]	[]	[]	[]	[]	TRUE	[]	2023-08-01 20:33:29	TRUE	🛑هجوم اكثر من 50 شخص تركي بشكل جماعي علي شخص يمني وإبنه بمجمع كريستال السكني في اسطنبول .. والطفل تم نقله الي وحدة العناية المركزة‼️ https://t.co/p1vAy4h2Ey	everyone	0	2014-06-07 20:49:21	هنا الإعلام الجديد مصدرك الأول لأهم الأخبار المنوعة الخاص للاعلانات فقط	[]	['بغداد_بوست']	[]	المملكة العربية السعودية	FALSE	598393	116	32807	371	2254	FALSE	84	هجوم اكثر من 50 شخص تركي بشكل جماعي علي شخص يمني وإبنه بمجمع كريستال السكني في اسطنبول .. والطفل تم نقله الي وحدة العناية المركزة	131	{'‼️': 'double exclamation mark', '🛑': 'stop sign'}	{'‼️': 1, '🛑': 1}	2	1	[]	0
1616481354069180434	TRUE	1628	1043	5811	136	588	2780406	2553262080	ar	[]	[]	[]	[]	['https://twitter.com/MBk6g/status/1616481354069180434/video/1']	[]	[]	[]	[]	[]	[]	TRUE	[]	2023-01-20 17:02:42	FALSE	😳 افتراس نمر ل مدربه بعد مرور 15 سنه على صداقتهم مع مشاركة النمور الباقيه لاتستهينوا بالحيوانات المفترسة ⛔تحذيرمحتوى حساس https://t.co/9gGr5VnL3T	everyone	1	2014-06-07 20:49:21	هنا الإعلام الجديد مصدرك الأول لأهم الأخبار المنوعة الخاص للاعلانات فقط	[]	['بغداد_بوست']	[]	المملكة العربية السعودية	FALSE	598393	116	32807	371	2254	FALSE	544	افتراس نمر ل مدربه بعد مرور 15 سنه على صداقتهم مع مشاركة النمور الباقيه لاتستهينوا بالحيوانات المفترسة تحذيرمحتوى حساس	120	{'⛔': 'no entry', '😳': 'flushed face'}	{'⛔': 1, '😳': 1}	2	0	[]	0
1692916382533394939	FALSE	3	1	7	0	1	2246	2471323326	ar	[]	[]	['الهلال', 'جمهوری_الهلال', 'الهلال_الفيحاء']	[]	['https://twitter.com/aboalaz1400/status/1692916382533394939/video/1']	[]	[]	['Sports Team', 'Business Taxonomy', 'Unified Twitter Taxonomy', 'Unified Twitter Taxonomy', 'Unified Twitter Taxonomy']	['A sports team organization, like Arsenal and the Boston Celtics', 'Categories within Brand Verticals that narrow down the scope of Brands', 'A taxonomy of user interests. ', 'A taxonomy of user interests. ', 'A taxonomy of user interests. ']	['Al Hilal FC', 'Sports & Fitness Business', 'Al Hilal FC', 'Soccer', 'Sports']	['', 'Brands, companies, advertisers and every non-person handle with the profit intent related to sports nutrition, athletic apparel, sports apps, fitness venues', '', '', 'Sports']	TRUE	[]	2023-08-19 15:08:13	TRUE	تكدس جماهير #الهلال كبييييير الآن عند البوابات 🔥🔥🔥 جمهور عظيم #جمهوری_الهلال #الهلال_الفيحاء https://t.co/NWqmXrC2A0	everyone	1	2014-04-30 18:10:40	ﺇﺣﺘﺮﻡ ﺗُﺤﺘَﺮﻡ ''ﻓﻜﻦ ﺛﺮياً ﺑﺄﺧﻼﻗﻚ، ﻏﻨﻴﺎً ﺑﻘﻨﺎﻋﺎﺗﻚ '' ﻛﺒﻴﺮﺍً ﺑﺘﻮﺍﺿﻌﻚ '' ﻻ ﺗﻨﻈﺮ ﻟﻤﻦ ﻳﺘﻜﻠﻢ ﻋﻠﻴﻚ ﻣﻦ ﺧﻠﻔﻚ لأﻧﻪ ﻓﻲ الأﺻﻞ هو خلفك و ليس أمامك ..	[]	['بغداد_بوست']	[]	المدينة المنورة	FALSE	14915	3320	36450	25	29621	FALSE	52	تكدس جماهير الهلال كبييييير الآن عند البوابات جمهور عظيم جمهوری الهلال الهلال الفيحاء	90	{'🔥': 'fire'}	{'🔥': 3}	3	0	[]	0
1690121963983851520	FALSE	2	4	26	0	0	929	835528718252666880	ar	[]	[]	['فاغنر', 'بير', 'مالي', 'الجزائر', 'بريغوجين']	[]	['https://twitter.com/Smail_Naravas/status/1690121963983851520/photo/1', 'https://twitter.com/Smail_Naravas/status/1690121963983851520/photo/1']	[]	[]	[]	[]	[]	[]	TRUE	[]	2023-08-11 22:04:11	TRUE	تشهد هذه الليلة ومنذ سويعات اشتباكات بين قبائل أزوادية والجيش المالي مدعوما بقوة عسكرية من ميليشيات #فاغنر في منطقة #بير شمال #مالي الجيش المالي أخل باتفاق #الجزائر مع حركة الأزواد سنة 2015 وقام بهجوم مباغت على المنطقة مدعوما بميليشيات #بريغوجين للسيطرة على المنطقة الغنية بالذهب. https://t.co/ahxdKzABSn	everyone	1	2017-02-25 16:35:44	متمرد حر.. أَكتُبُ بصدق ما أراه صحيحا دون نفاق ولا تصنّع.. شعاري هو "إشنقوا آخر ملك طاغية بشعر لحية آخر شيخ بلاط"	[]	[]	[]	Algiers	FALSE	2700	345	16443	10	10267	FALSE	70	تشهد هذه الليلة ومنذ سويعات اشتباكات بين قبائل أزوادية والجيش المالي مدعوما بقوة عسكرية من ميليشيات فاغنر في منطقة بير شمال مالي الجيش المالي أخل باتفاق الجزائر مع حركة الأزواد سنة 2015 وقام بهجوم مباغت على المنطقة مدعوما بميليشيات بريغوجين للسيطرة على المنطقة الغنية بالذهب.	276	{}	{}	0	0	[]	0
1692843099695779889	FALSE	205	187	984	404	320	565898	1373965201616346880	ar	['تركيا']	['Place']	[]	[]	['https://twitter.com/ivarmm/status/1692843099695779889/photo/1']	[]	[]	[]	[]	[]	[]	TRUE	[]	2023-08-19 10:17:01	FALSE	- في تركيا تم إطلاق موقع اسمه " السوريون " يعطي الموقع جوائز لمن يقتـ.ل سورياً أو يقط.ـع يده أو رأسه أو يقتـ.ل طفلاً الدفع بواسطة البيتكوين ولا يمكن مراقبتهم https://t.co/fEzeFFn4EV	everyone	1	2021-03-22 11:50:18		[]	[]	[]		FALSE	47835	616	13135	43	18151	FALSE	54	في تركيا تم إطلاق موقع اسمه السوريون يعطي الموقع جوائز لمن يقتـ.ل سورياً أو يقط.ـع يده أو رأسه أو يقتـ.ل طفلاً الدفع بواسطة البيتكوين ولا يمكن مراقبتهم	156	{}	{}	0	1	[]	0
1692936301115285998	FALSE	121	155	317	32	33	72628	1646302034059055104	ar	['الكويت', 'الكويت', 'إيران', 'إيران', 'إيران', 'دولة', 'مصر', 'مصر']	['Place', 'Place', 'Place', 'Place', 'Place', 'Place', 'Place', 'Place']	['هنغرد_في_عشق_مصر']	[]	['https://twitter.com/i/web/status/1692936301115285998', 'https://twitter.com/sANa4327194M0h/status/1692936301115285998/video/1']	[]	[]	[]	[]	[]	[]	TRUE	[]	2023-08-19 16:27:22	TRUE	#هنغرد_في_عشق_مصر 🔥الكويت تعلن إفلاسها و عجزها عن دفع المرتبات للشعب 📌لان الكويت كانت بتعتمد علي النفط نسوا ان النفط هيجي وقت و هيخلص 📌ده غير مشكلتهم مع إيران فى موضوع حقل الدُرة اللي شكل إيران هتاخده و مش ناوية علي خير 📌إيران ولا يفرق معاها حد او دولة غير مصر و مصر مش… https://t.co/mo1yfRWAJb https://t.co/VswgpCsIQU	everyone	1	2023-04-12 23:59:38	بلدي و رئيسي خط احمر 🔴 مقاتلة في معركة الوعي 💡🇪🇬 و ممنوع ⛔️ دخول اهل الشر مرتزقة ابليس + بتوع مبارك و شكرا جزيلًا 🌹😁	[]	[]	[]		FALSE	11470	2762	24321	8	29157	FALSE	55	هنغرد في عشق مصر الكويت تعلن إفلاسها و عجزها عن دفع المرتبات للشعب لان الكويت كانت بتعتمد علي النفط نسوا ان النفط هيجي وقت و هيخلص ده غير مشكلتهم مع إيران فى موضوع حقل الدُرة اللي شكل إيران هتاخده و مش ناوية علي خير إيران ولا يفرق معاها حد او دولة غير مصر و مصر مش	273	{'🔥': 'fire', '📌': 'pushpin'}	{'🔥': 1, '📌': 3}	4	8	[]	0
1692521021260046451	FALSE	89	384	405	72	24	265424	1285618608299745024	ar	['مجلس النواب اللبناني']	['Organization']	[]	[]	['https://twitter.com/US_World1/status/1692521021260046451/photo/1']	[]	[]	[]	[]	[]	[]	TRUE	[]	2023-08-18 12:57:11	TRUE	رئيس كتلة الوفاء الجناح السياسي لحزب الله في مجلس النواب اللبناني: سنمتنع عن التصويت على قانون تشريع المثلية، ولن نرفضه احترامًا لهذه الفئة وليس لنا علاقة به. https://t.co/wjk7fpYuj2	everyone	1	2020-07-21 16:52:30	المنصة العربية الأولى لتغطية الأخبار الأمريكية أولاً بأول من شبكة الأحداث الإعلامية	[]	[]	[]	Texas, USA	FALSE	1806179	0	32334	1881	207	FALSE	57	رئيس كتلة الوفاء الجناح السياسي لحزب الله في مجلس النواب اللبناني: سنمتنع عن التصويت على قانون تشريع المثلية، ولن نرفضه احترامًا لهذه الفئة وليس لنا علاقة به.	160	{}	{}	0	1	['مجلس النواب اللبناني']	1
1691234907274514432	FALSE	464	221	2697	69	41	756728	1285618608299745024	ar	['تل', 'أبيب']	['Place', 'Place']	[]	[]	['https://twitter.com/US_World1/status/1691234907274514432/video/1']	[]	[]	[]	[]	[]	[]	TRUE	[]	2023-08-14 23:46:38	TRUE	🚨انفجار ضخم في مصنع كيماويات شمال تل أبيب، ومخاوف من تسرب مواد كيميائية. https://t.co/gsT0OQznqz	everyone	1	2020-07-21 16:52:30	المنصة العربية الأولى لتغطية الأخبار الأمريكية أولاً بأول من شبكة الأحداث الإعلامية	[]	[]	[]	Texas, USA	FALSE	1806179	0	32334	1881	207	FALSE	66	انفجار ضخم في مصنع كيماويات شمال تل أبيب، ومخاوف من تسرب مواد كيميائية.	72	{'🚨': 'police car light'}	{'🚨': 1}	1	2	[]	0
1686544726390898688	FALSE	262	616	1612	86	129	2296396	1285618608299745024	ar	['تركيا']	['Place']	[]	[]	['https://twitter.com/furkancerkes/status/1686149043246845952/video/1']	[]	[]	[]	[]	[]	[]	TRUE	[]	2023-08-02 01:09:31	TRUE	مقتل طفل في تركيا بعد إعتداء 50 شخص عليه. https://t.co/w51rKtM9yT	everyone	1	2020-07-21 16:52:30	المنصة العربية الأولى لتغطية الأخبار الأمريكية أولاً بأول من شبكة الأحداث الإعلامية	[]	[]	[]	Texas, USA	FALSE	1806179	0	32334	1881	207	FALSE	84	مقتل طفل في تركيا بعد إعتداء 50 شخص عليه.	42	{}	{}	0	1	[]	0
1679314934541189121	FALSE	198	100	1449	18	48	444712	1285618608299745024	ar	['شيكاغو الأمريكية']	['Place']	[]	[]	['https://twitter.com/US_World1/status/1679314934541189121/video/1']	[]	[]	[]	[]	[]	[]	TRUE	[]	2023-07-13 02:20:55	TRUE	🚨صافرات الإنذار تدوي في مدينة شيكاغو الأمريكية بسبب إعصار عنيف يتجه نحو المدينة. https://t.co/Qea1cNhXIp	everyone	1	2020-07-21 16:52:30	المنصة العربية الأولى لتغطية الأخبار الأمريكية أولاً بأول من شبكة الأحداث الإعلامية	[]	[]	[]	Texas, USA	FALSE	1806179	0	32334	1881	207	FALSE	131	صافرات الإنذار تدوي في مدينة شيكاغو الأمريكية بسبب إعصار عنيف يتجه نحو المدينة.	80	{'🚨': 'police car light'}	{'🚨': 1}	1	1	[]	0
1686154364358955008	FALSE	555	141	5948	59	173	1508183	1285618608299745024	ar	[]	[]	[]	[]	['https://twitter.com/US_World1/status/1686154364358955008/video/1']	[]	[]	[]	[]	[]	[]	TRUE	[]	2023-07-31 23:18:22	TRUE	🚨احتفاء شعبي كبير في رئيس بوركينا فاسو بعد خطابه التاريخي. https://t.co/tvwoTc2OAG	everyone	1	2020-07-21 16:52:30	المنصة العربية الأولى لتغطية الأخبار الأمريكية أولاً بأول من شبكة الأحداث الإعلامية	[]	[]	[]	Texas, USA	FALSE	1806179	0	32334	1881	207	FALSE	89	احتفاء شعبي كبير في رئيس بوركينا فاسو بعد خطابه التاريخي.	58	{'🚨': 'police car light'}	{'🚨': 1}	1	0	[]	0
1581000220267393024	FALSE	33	41	474	11	7	0	1285618608299745024	ar	['إبراهيم تراوري']	['Person']	[]	[]	['https://twitter.com/US_World1/status/1581000220267393024/photo/1']	[]	[]	[]	[]	[]	[]	TRUE	[]	2022-10-14 19:13:20	TRUE	تسمية إبراهيم تراوري رئيسا انتقاليا في بوركينا فاسو. https://t.co/Hx1TLcvLlW	everyone	0	2020-07-21 16:52:30	المنصة العربية الأولى لتغطية الأخبار الأمريكية أولاً بأول من شبكة الأحداث الإعلامية	[]	[]	[]	Texas, USA	FALSE	1806179	0	32334	1881	207	FALSE	89	تسمية إبراهيم تراوري رئيسا انتقاليا في بوركينا فاسو.	53	{}	{}	0	1	[]	0
1674758349475180545	FALSE	763	872	7150	309	235	3139290	1285618608299745024	ar	['السويد']	['Place']	[]	[]	['https://twitter.com/US_World1/status/1674758349475180545/video/1']	[]	[]	[]	[]	[]	[]	TRUE	[]	2023-06-30 12:34:40	TRUE	طالبان تفجر علم السويد بعد حادثة حرق القرآن. https://t.co/F7UN4as1WC	everyone	1	2020-07-21 16:52:30	المنصة العربية الأولى لتغطية الأخبار الأمريكية أولاً بأول من شبكة الأحداث الإعلامية	[]	[]	[]	Texas, USA	FALSE	1806179	0	32334	1881	207	FALSE	165	طالبان تفجر علم السويد بعد حادثة حرق القرآن.	45	{}	{}	0	1	[]	0
1651619397918683136	FALSE	77	1625	1535	197	21	1145044	1285618608299745024	ar	['النصر']	['Organization']	[]	[]	['https://twitter.com/US_World1/status/1651619397918683136/photo/1']	[]	[]	[]	[]	[]	[]	TRUE	[]	2023-04-27 16:08:44	TRUE	زيلينسكي: أتطلع لدعم الدول العربية لتحقيق النصر ! https://t.co/q9Qu7fI6KK	everyone	1	2020-07-21 16:52:30	المنصة العربية الأولى لتغطية الأخبار الأمريكية أولاً بأول من شبكة الأحداث الإعلامية	[]	[]	[]	Texas, USA	FALSE	1806179	0	32334	1881	207	FALSE	333	زيلينسكي: أتطلع لدعم الدول العربية لتحقيق النصر	49	{}	{}	0	1	['النصر']	1
1648487543695106050	FALSE	388	201	2574	40	91	1211533	1285618608299745024	ar	['الأمم المتحدة']	['Organization']	['السودان']	[]	['https://twitter.com/US_World1/status/1648487543695106050/video/1']	[]	[]	['Brand Vertical', 'Entities [Entity Service]', 'Brand', 'Political Body', 'Unified Twitter Taxonomy', 'Unified Twitter Taxonomy', 'Unified Twitter Taxonomy']	['Top level entities that describe a Brands industry', 'Entity Service top level domain, every item that is in Entity Service should be in this domain', 'Brands and Companies', 'A section of a government, like The Supreme Court', 'A taxonomy of user interests. ', 'A taxonomy of user interests. ', 'A taxonomy of user interests. ']	['Government/Education', 'Non-profit - Government/Education', 'United Nations', 'United Nations', 'United Nations', 'Politics', 'Government institutions']	['', '', 'Global conversation about the United Nations and all related efforts.', 'Global conversation about the United Nations and all related efforts.', 'Global conversation about the United Nations and all related efforts.', 'Politics', 'Political Body']	TRUE	[]	2023-04-19 00:43:52	TRUE	قائد الجيش الأعلى البرهان يهدد بطرد مبعوث الأمم المتحدة في #السودان: "أنت كاذب.. وإذا تجاوزت مرة أخرى سوف نطردك". https://t.co/wGsqepuIAZ	everyone	1	2020-07-21 16:52:30	المنصة العربية الأولى لتغطية الأخبار الأمريكية أولاً بأول من شبكة الأحداث الإعلامية	[]	[]	[]	Texas, USA	FALSE	1806179	0	32334	1881	207	FALSE	358	قائد الجيش الأعلى البرهان يهدد بطرد مبعوث الأمم المتحدة في السودان: أنت كاذب.. وإذا تجاوزت مرة أخرى سوف نطردك.	112	{}	{}	0	1	['الأمم المتحدة']	1
1646430307271229440	FALSE	363	168	2272	67	60	1603775	1285618608299745024	ar	[]	[]	[]	[]	['https://twitter.com/US_World1/status/1646430307271229440/video/1']	[]	[]	[]	[]	[]	[]	TRUE	[]	2023-04-13 08:29:09	TRUE	الرئيس الصيني مخاطباً جيشه بالزي العسكري: "استعدوا للعمليات القتالية الحقيقية". https://t.co/kUItoiMZa3	everyone	1	2020-07-21 16:52:30	المنصة العربية الأولى لتغطية الأخبار الأمريكية أولاً بأول من شبكة الأحداث الإعلامية	[]	[]	[]	Texas, USA	FALSE	1806179	0	32334	1881	207	FALSE	369	الرئيس الصيني مخاطباً جيشه بالزي العسكري: استعدوا للعمليات القتالية الحقيقية.	79	{}	{}	0	0	[]	0
1581563848829685760	FALSE	265	130	1774	32	51	0	1285618608299745024	ar	['ألمانيا']	['Place']	[]	[]	['https://twitter.com/US_World1/status/1581563848829685760/video/1']	[]	[]	['Brand Vertical', 'Entities [Entity Service]', 'Brand']	['Top level entities that describe a Brands industry', 'Entity Service top level domain, every item that is in Entity Service should be in this domain', 'Brands and Companies']	['Entertainment', 'TV/Movies Related - Entertainment', 'Euronews']	['', '', '']	TRUE	[]	2022-10-16 08:33:00	TRUE	EuroNews: للمرة الأولى.. أكبر مساجد ألمانيا يرفع الأذان. https://t.co/jZTaniwHJA	everyone	0	2020-07-21 16:52:30	المنصة العربية الأولى لتغطية الأخبار الأمريكية أولاً بأول من شبكة الأحداث الإعلامية	[]	[]	[]	Texas, USA	FALSE	1806179	0	32334	1881	207	FALSE	401	: للمرة الأولى.. أكبر مساجد ألمانيا يرفع الأذان.	49	{}	{}	0	1	[]	0
1588951709833121792	FALSE	114	393	1628	27	24	0	1285618608299745024	ar	['الجزائر']	['Place']	[]	[]	['https://twitter.com/US_World1/status/1588951709833121792/photo/1']	[]	[]	[]	[]	[]	[]	TRUE	[]	2022-11-05 17:49:43	TRUE	ملك المغرب يدعو رئيس الجزائر إلى "الحوار" في الرباط. https://t.co/oPUCTzQACq	everyone	0	2020-07-21 16:52:30	المنصة العربية الأولى لتغطية الأخبار الأمريكية أولاً بأول من شبكة الأحداث الإعلامية	[]	[]	[]	Texas, USA	FALSE	1806179	0	32334	1881	207	FALSE	402	ملك المغرب يدعو رئيس الجزائر إلى الحوار في الرباط.	51	{}	{}	0	1	[]	0
1562089386216415234	FALSE	144	58	634	17	26	0	1285618608299745024	ar	[]	[]	['الصين']	[]	['https://twitter.com/Byron_Wan/status/1561437344854462464/video/1']	[]	[]	[]	[]	[]	[]	TRUE	[]	2022-08-23 14:48:26	TRUE	جفاف المياه أحدى أكبر البحيرات في #الصين. https://t.co/rPIMtBhVig	everyone	0	2020-07-21 16:52:30	المنصة العربية الأولى لتغطية الأخبار الأمريكية أولاً بأول من شبكة الأحداث الإعلامية	[]	[]	[]	Texas, USA	FALSE	1806179	0	32334	1881	207	FALSE	437	جفاف المياه أحدى أكبر البحيرات في الصين.	41	{}	{}	0	0	[]	0
1437402519211319301	FALSE	48	17	190	12	12	0	1285618608299745024	ar	['ميامي']	['Place']	[]	[]	['https://twitter.com/DannyWQAM/status/1436835559264202759/video/1']	[]	[]	[]	[]	[]	[]	TRUE	[]	2021-09-13 13:07:20	TRUE	إنقاذ قطة من السقوط في ملعب هارد روك في ميامي وسط تفاعل جماهيري كبير https://t.co/fnxr2ZIAUx	everyone	0	2020-07-21 16:52:30	المنصة العربية الأولى لتغطية الأخبار الأمريكية أولاً بأول من شبكة الأحداث الإعلامية	[]	[]	[]	Texas, USA	FALSE	1806179	0	32334	1881	207	FALSE	609	إنقاذ قطة من السقوط في ملعب هارد روك في ميامي وسط تفاعل جماهيري كبير	69	{}	{}	0	1	[]	0
1587182670634795008	FALSE	219	310	1664	73	99	0	1285618608299745024	ar	['قطر']	['Place']	[]	[]	['https://twitter.com/US_World1/status/1587182670634795008/video/1']	[]	[]	['Sports League', 'Business Taxonomy', 'Unified Twitter Taxonomy', 'Unified Twitter Taxonomy', 'Unified Twitter Taxonomy', 'Unified Twitter Taxonomy', 'Unified Twitter Taxonomy']	['', 'Categories within Brand Verticals that narrow down the scope of Brands', 'A taxonomy of user interests. ', 'A taxonomy of user interests. ', 'A taxonomy of user interests. ', 'A taxonomy of user interests. ', 'A taxonomy of user interests. ']	["FIFA Men's World Cup", 'Sports & Fitness Business', 'Soccer', 'Sports', 'Sports events', "FIFA Men's World Cup", 'Events']	['', 'Brands, companies, advertisers and every non-person handle with the profit intent related to sports nutrition, athletic apparel, sports apps, fitness venues', '', 'Sports', '', '', '']	TRUE	[]	2022-10-31 20:40:11	TRUE	رحّالة باكستاني (70 عام) يمشي على الأقدام لحضور كأس العالم 2022 في قطر https://t.co/VCncZm3pdM	everyone	1	2020-07-21 16:52:30	المنصة العربية الأولى لتغطية الأخبار الأمريكية أولاً بأول من شبكة الأحداث الإعلامية	[]	[]	[]	Texas, USA	FALSE	1806179	0	32334	1881	207	FALSE	685	رحّالة باكستاني 70 عام يمشي على الأقدام لحضور كأس العالم 2022 في قطر	69	{}	{}	0	1	[]	0
1585943165907107841	FALSE	439	254	3046	96	62	0	1285618608299745024	ar	['تويتر']	['Product']	[]	[]	['https://twitter.com/US_World1/status/1585943165907107841/photo/1']	[]	[]	['Business Taxonomy', 'Business Taxonomy', 'Person', 'Entities [Entity Service]', 'Brand', 'Interests and Hobbies Vertical', 'Interests and Hobbies Category', 'Unified Twitter Taxonomy', 'Unified Twitter Taxonomy', 'Unified Twitter Taxonomy']	['Categories within Brand Verticals that narrow down the scope of Brands', 'Categories within Brand Verticals that narrow down the scope of Brands', 'Named people in the world like Nelson Mandela', 'Entity Service top level domain, every item that is in Entity Service should be in this domain', 'Brands and Companies', 'Top level interests and hobbies groupings, like Food or Travel', 'A grouping o…	['Financial Services Business', 'Technology Business', 'Elon Musk', 'Services', 'X', 'Business & finance', 'Leadership', 'Elon Musk', 'Tech personalities', 'Business personalities']	['Brands, companies, advertisers and every non-person handle with the profit intent related to Banks, Credit cards, Insurance, Investments, Stocks ', 'Brands, companies, advertisers and every non-person handle with the profit intent related to softwares, apps, communication equipments, hardwares', 'Elon Musk', '', '', '', 'Leadership', 'Elon Musk', 'Tech Professionals', '']	TRUE	[]	2022-10-28 10:34:50	TRUE	بعد تحرير الطائر.. إيلون ماسك يُقيل 4 من كبار مسؤولي تويتر https://t.co/GD8DbX1pvg	everyone	0	2020-07-21 16:52:30	المنصة العربية الأولى لتغطية الأخبار الأمريكية أولاً بأول من شبكة الأحداث الإعلامية	[]	[]	[]	Texas, USA	FALSE	1806179	0	32334	1881	207	FALSE	690	بعد تحرير الطائر.. إيلون ماسك يُقيل 4 من كبار مسؤولي تويتر	59	{}	{}	0	1	[]	0
1585891702073487360	FALSE	122	79	1594	12	8	0	1285618608299745024	ar	['تويتر']	['Product']	[]	[]	[]	[]	[]	['Business Taxonomy', 'Business Taxonomy', 'Person', 'Entities [Entity Service]', 'Brand', 'Interests and Hobbies Vertical', 'Interests and Hobbies Category', 'Unified Twitter Taxonomy', 'Unified Twitter Taxonomy', 'Unified Twitter Taxonomy']	['Categories within Brand Verticals that narrow down the scope of Brands', 'Categories within Brand Verticals that narrow down the scope of Brands', 'Named people in the world like Nelson Mandela', 'Entity Service top level domain, every item that is in Entity Service should be in this domain', 'Brands and Companies', 'Top level interests and hobbies groupings, like Food or Travel', 'A grouping o…	['Financial Services Business', 'Technology Business', 'Elon Musk', 'Services', 'X', 'Business & finance', 'Leadership', 'Elon Musk', 'Tech personalities', 'Business personalities']	['Brands, companies, advertisers and every non-person handle with the profit intent related to Banks, Credit cards, Insurance, Investments, Stocks ', 'Brands, companies, advertisers and every non-person handle with the profit intent related to softwares, apps, communication equipments, hardwares', 'Elon Musk', '', '', '', 'Leadership', 'Elon Musk', 'Tech Professionals', '']	TRUE	[]	2022-10-28 07:10:20	TRUE	إيلون ماسك يقيل عددا من المسؤولين الكبار في تويتر	everyone	0	2020-07-21 16:52:30	المنصة العربية الأولى لتغطية الأخبار الأمريكية أولاً بأول من شبكة الأحداث الإعلامية	[]	[]	[]	Texas, USA	FALSE	1806179	0	32334	1881	207	FALSE	690	إيلون ماسك يقيل عددا من المسؤولين الكبار في تويتر	49	{}	{}	0	1	[]	0
1581855330199560192	FALSE	217	192	1390	64	44	0	1285618608299745024	ar	['أوروبا']	['Place']	[]	[]	['https://twitter.com/US_World1/status/1581855330199560192/photo/1']	[]	[]	[]	[]	[]	[]	TRUE	[]	2022-10-17 03:51:14	TRUE	🚨القاذفات الأمريكية النووية B-52 تحلق فوق أوروبا. https://t.co/n2cRwJpNR1	everyone	1	2020-07-21 16:52:30	المنصة العربية الأولى لتغطية الأخبار الأمريكية أولاً بأول من شبكة الأحداث الإعلامية	[]	[]	[]	Texas, USA	FALSE	1806179	0	32334	1881	207	FALSE	712	القاذفات الأمريكية النووية 52 تحلق فوق أوروبا.	47	{'🚨': 'police car light'}	{'🚨': 1}	1	1	[]	0
1575977431806054402	FALSE	189	140	2466	63	24	0	1285618608299745024	ar	['مجلس الأمن الروسي', 'أوكرانيا', 'روسيا']	['Organization', 'Place', 'Place']	[]	[]	[]	[]	[]	[]	[]	[]	[]	TRUE	[]	2022-09-30 22:34:34	TRUE	🚨نائب رئيس مجلس الأمن الروسي: إذا لم يتم قبول أوكرانيا في حلف الناتو فيمكننا قبولها في روسيا.	everyone	1	2020-07-21 16:52:30	المنصة العربية الأولى لتغطية الأخبار الأمريكية أولاً بأول من شبكة الأحداث الإعلامية	[]	[]	[]	Texas, USA	FALSE	1806179	0	32334	1881	207	FALSE	758	نائب رئيس مجلس الأمن الروسي: إذا لم يتم قبول أوكرانيا في حلف الناتو فيمكننا قبولها في روسيا.	92	{'🚨': 'police car light'}	{'🚨': 1}	1	3	['مجلس الأمن الروسي']	1
1574012945218011137	FALSE	291	934	3980	216	172	0	1285618608299745024	ar	['إيران']	['Place']	[]	[]	['https://twitter.com/US_World1/status/1574012945218011137/photo/1']	[]	[]	[]	[]	[]	[]	TRUE	[]	2022-09-25 12:28:24	TRUE	قوات إقليم كردستان تتمركز على حدود إيران. https://t.co/dj761jBMcb	everyone	1	2020-07-21 16:52:30	المنصة العربية الأولى لتغطية الأخبار الأمريكية أولاً بأول من شبكة الأحداث الإعلامية	[]	[]	[]	Texas, USA	FALSE	1806179	0	32334	1881	207	FALSE	785	قوات إقليم كردستان تتمركز على حدود إيران.	42	{}	{}	0	1	[]	0
1568925135641477121	FALSE	905	729	4239	419	387	0	1285618608299745024	ar	[]	[]	[]	[]	['https://twitter.com/US_World1/status/1568925135641477121/video/1']	[]	[]	['Person', 'Politician', 'Unified Twitter Taxonomy', 'Unified Twitter Taxonomy', 'Unified Twitter Taxonomy']	['Named people in the world like Nelson Mandela', 'Politicians in the world, like Joe Biden', 'A taxonomy of user interests. ', 'A taxonomy of user interests. ', 'A taxonomy of user interests. ']	['Elizabeth II', 'Elizabeth II', 'Elizabeth II', 'Politics', 'Political figures']	['Queen of the United Kingdom and the other Commonwealth realms', 'Queen of the United Kingdom and the other Commonwealth realms', 'Queen of the United Kingdom and the other Commonwealth realms', 'Politics', 'Politician']	TRUE	[]	2022-09-11 11:31:16	TRUE	خطأ فادح لمترجم قناة العربية أثناء كلمة الملك تشارلز الثالث: "أنا في غاية السعادة بوفاة أمي الملكة إليزابيث". https://t.co/5HJ5uyWMkv	everyone	0	2020-07-21 16:52:30	المنصة العربية الأولى لتغطية الأخبار الأمريكية أولاً بأول من شبكة الأحداث الإعلامية	[]	[]	[]	Texas, USA	FALSE	1806179	0	32334	1881	207	FALSE	834	خطأ فادح لمترجم قناة العربية أثناء كلمة الملك تشارلز الثالث: أنا في غاية السعادة بوفاة أمي الملكة إليزابيث.	108	{}	{}	0	0	[]	0
1559855064302362624	FALSE	1260	241	5641	134	337	0	1285618608299745024	ar	['أوروبا']	['Place']	['ألمانيا']	[]	['https://twitter.com/US_World1/status/1559855064302362624/photo/1']	[]	[]	[]	[]	[]	[]	TRUE	[]	2022-08-17 10:50:02	TRUE	ظهور صخور بعبارات "الأوقات الصعبة قادمة" في #ألمانيا بعد انخفاض مستوى الأنهار في أوروبا، ونُحت عليها "إذا رأيتني.. فابكِ" في عام المشقة 1616. https://t.co/e4LDHGKVgp	everyone	1	2020-07-21 16:52:30	المنصة العربية الأولى لتغطية الأخبار الأمريكية أولاً بأول من شبكة الأحداث الإعلامية	[]	[]	[]	Texas, USA	FALSE	1806179	0	32334	1881	207	FALSE	874	ظهور صخور بعبارات الأوقات الصعبة قادمة في ألمانيا بعد انخفاض مستوى الأنهار في أوروبا، ونُحت عليها إذا رأيتني.. فابكِ في عام المشقة 1616.	137	{}	{}	0	1	[]	0
1691897186756223218	FALSE	21	23	175	6	1	27641	285975836	ar	[]	[]	['لبنان', 'فساد', 'ازمات']	[]	['https://twitter.com/marwanmatni/status/1691897186756223218/photo/1']	[]	[]	[]	[]	[]	[]	TRUE	[]	2023-08-16 19:38:17	TRUE	عتمة المطار في عزّ موسم الإصطياف تؤكد المؤكد .. العصابة التي مازالت في السلطة والتي نهبت عشرات مليارات الدولارات لإصلاح الكهرباء .. لن تُنتج الّا الظلمة! #لبنان #فساد #ازمات https://t.co/ZmnUOIal79	everyone	1	2011-04-22 03:49:42	journalist	[]	[]	[]	lebanon, france	FALSE	12068	4365	45066	53	36459	FALSE	59	عتمة المطار في عزّ موسم الإصطياف تؤكد المؤكد .. العصابة التي مازالت في السلطة والتي نهبت عشرات مليارات الدولارات لإصلاح الكهرباء .. لن تُنتج الّا الظلمة لبنان فساد ازمات	171	{}	{}	0	0	[]	0
1571461471975968768	FALSE	1	0	1	0	0	0	285975836	ar	[]	[]	['زلزال_تايوان']	[]	['https://twitter.com/marwanmatni/status/1571461471975968768/photo/1', 'https://twitter.com/marwanmatni/status/1571461471975968768/photo/1']	[]	[]	[]	[]	[]	[]	TRUE	[]	2022-09-18 11:29:45	FALSE	تتوالى صور الدمار الذي الحقه #زلزال_تايوان المُدَمِّر.. وترقب موجات مد تسونامي مُحتملة.. ولا حصيلة اولية بعد عن خسائر بشرية https://t.co/DNr631QOen	everyone	1	2011-04-22 03:49:42	journalist	[]	[]	[]	lebanon, france	FALSE	12068	4365	45066	53	36459	FALSE	804	تتوالى صور الدمار الذي الحقه زلزال تايوان المُدَمِّر.. وترقب موجات مد تسونامي مُحتملة.. ولا حصيلة اولية بعد عن خسائر بشرية	123	{}	{}	0	0	[]	0
1691561744693330031	FALSE	0	0	1	0	0	255	263497240	ar	['نيمار', 'السعودية', 'الهلال السعودي']	['Person', 'Place', 'Organization']	[]	[]	['https://twitter.com/hamod_620/status/1691468038602645504/video/1']	[]	[]	['Person', 'Sports Team', 'Business Taxonomy', 'Athlete', 'Unified Twitter Taxonomy', 'Unified Twitter Taxonomy', 'Unified Twitter Taxonomy', 'Unified Twitter Taxonomy']	['Named people in the world like Nelson Mandela', 'A sports team organization, like Arsenal and the Boston Celtics', 'Categories within Brand Verticals that narrow down the scope of Brands', 'An athlete in the world, like Serena Williams or Lionel Messi', 'A taxonomy of user interests. ', 'A taxonomy of user interests. ', 'A taxonomy of user interests. ', 'A taxonomy of user interests. ']	['Neymar ', 'Al Hilal FC', 'Sports & Fitness Business', 'Neymar ', 'Al Hilal FC', 'Soccer', 'Neymar ', 'Sports']	['', '', 'Brands, companies, advertisers and every non-person handle with the profit intent related to sports nutrition, athletic apparel, sports apps, fitness venues', '', '', '', '', 'Sports']	TRUE	[]	2023-08-15 21:25:22	TRUE	نيمار يصل الى السعودية بعد تعاقده مع نادي الهلال السعودي https://t.co/GXQcXehhoU	everyone	1	2011-03-10 04:25:24	أبنُ رجلٍ سجدت له الملائكة ، اتداول المتداول .	[]	[]	[]	في قلبك	FALSE	506	210	3788	1	368	FALSE	60	نيمار يصل الى السعودية بعد تعاقده مع نادي الهلال السعودي	59	{}	{}	0	3	['الهلال السعودي']	1
1681380785117446145	FALSE	0	0	0	0	0	81	263497240	ar	[]	[]	[]	[]	['https://twitter.com/vdeoo0/status/1681008863548416000/video/1']	[]	[]	[]	[]	[]	[]	TRUE	[]	2023-07-18 19:09:52	TRUE	🛑 شرطي بريطاني يقوم ب اطلاق النار على سيدة ويرديها ! https://t.co/8IhABxCTle	everyone	1	2011-03-10 04:25:24	أبنُ رجلٍ سجدت له الملائكة ، اتداول المتداول .	[]	[]	[]	في قلبك	FALSE	506	210	3788	1	368	FALSE	122	شرطي بريطاني يقوم ب اطلاق النار على سيدة ويرديها	53	{'🛑': 'stop sign'}	{'🛑': 1}	1	0	[]	0
1691646861776466070	FALSE	125	86	537	12	17	105169	248757465	ar	['القاهرة', 'مطار زامبيا']	['Place', 'Place']	[]	[]	['https://twitter.com/RachelGreen946q/status/1691585280648605775/video/1', 'https://twitter.com/RachelGreen946q/status/1691585280648605775/video/1']	[]	[]	['Person', 'Journalist', 'Unified Twitter Taxonomy', 'Unified Twitter Taxonomy']	['Named people in the world like Nelson Mandela', "A journalist like 'Anderson Cooper'", 'A taxonomy of user interests. ', 'A taxonomy of user interests. ']	['Samy kamaleldeen', 'Samy kamaleldeen', 'Journalists', 'Samy kamaleldeen']	['', '', 'Journalism', '']	TRUE	[]	2023-08-16 03:03:35	FALSE	ضاعت فلوسك يا عم صابر، كله بيهرب دولارات طب الجنيه الغلبان مفيش حد عايز يهربه ليه طب و صقور الجمارك 😂 على السلطات الزامبية إعادة الدهب والدولارات والاحتفاظ ب 6 مصريين 6 مليون دولار و 127 كيلو دهب ومخدرات على الطائرة القادمة من مطار القاهرة في مطار زامبيا https://t.co/NDZ3NfvUgk	everyone	1	2011-02-07 17:21:53	جورنالجي وإعلامي "مستقل" قدم #الحرام #في_المليان #القشاش ولديه12مؤلفا ربي لا تحشرني في زمرة كذبة لسياسة اللهم اجعل قلمي نصيرالكل مظلوم مصر عندي أحب وأجمل الأشيا	[]	['الحرام', 'في_المليان', 'القشاش']	[]	London, England	FALSE	781835	392	66322	642	106549	FALSE	61	ضاعت فلوسك يا عم صابر، كله بيهرب دولارات طب الجنيه الغلبان مفيش حد عايز يهربه ليه طب و صقور الجمارك على السلطات الزامبية إعادة الدهب والدولارات والاحتفاظ ب 6 مصريين 6 مليون دولار و 127 كيلو دهب ومخدرات على الطائرة القادمة من مطار القاهرة في مطار زامبيا	255	{'😂': 'face with tears of joy'}	{'😂': 1}	1	2	[]	0
1691377286946136064	FALSE	55	46	159	3	14	52200	4691775678	ar	[]	[]	['تركيا', 'الاتراك_ليسوا_عنصريين']	[]	['https://twitter.com/naif_almamri/status/1691377286946136064/video/1']	[]	[]	[]	[]	[]	[]	TRUE	[]	2023-08-15 09:12:24	TRUE	اعتداء اتراك على سائح عماني قلنا لكم الف مرة الدوله يوم مافيها امن وامان ولا شعبها يحترم سائحين لا تسافرو لها غيرها دول #تركيا #الاتراك_ليسوا_عنصريين https://t.co/OBgpvq3VMB	everyone	1	2016-01-01 21:31:15	😎 محب السفر ✈️ محب الفنادق 🏢 محب التخيم ⛺️ محب الشواطئ 🏖🚣🏊‍♂️	[]	['الحرام', 'في_المليان', 'القشاش']	[]	استغفرالله	FALSE	3215	453	31207	0	231857	FALSE	62	اعتداء اتراك على سائح عماني قلنا لكم الف مرة الدوله يوم مافيها امن وامان ولا شعبها يحترم سائحين لا تسافرو لها غيرها دول تركيا الاتراك ليسوا عنصريين	153	{}	{}	0	0	[]	0
1690075567389884416	FALSE	47	33	568	0	9	25239	1548967999843062016	ar	['إنييستا', 'الإمارات', 'إنتر', '', '', 'قصىف']	['Person', 'Place', 'Organization', 'Person', 'Person', 'Person']	[]	[]	['https://twitter.com/lfc00966/status/1690075567389884416/photo/1']	[]	[]	['Sports Team', 'Business Taxonomy', 'Unified Twitter Taxonomy', 'Unified Twitter Taxonomy', 'Unified Twitter Taxonomy']	['A sports team organization, like Arsenal and the Boston Celtics', 'Categories within Brand Verticals that narrow down the scope of Brands', 'A taxonomy of user interests. ', 'A taxonomy of user interests. ', 'A taxonomy of user interests. ']	['Inter Milan', 'Sports & Fitness Business', 'Inter Milan', 'Soccer', 'Sports']	['', 'Brands, companies, advertisers and every non-person handle with the profit intent related to sports nutrition, athletic apparel, sports apps, fitness venues', '', '', 'Sports']	TRUE	[]	2023-08-11 18:59:50	TRUE	إنييستا : فضلت نادي الإمارات على الإنضمام إلى إنتر ميامي لأنني دائماً أختار اللعب بالمستوى الأعلى قصىف جبهة عبسي 👌😂 https://t.co/CtSk7rht1O	everyone	1	2022-07-18 09:48:54	عضو في نادي مشجعي ليفربول السعودية @LFC @LFC_SA_	[]	[]	[]	من قلب الآنفيلد	FALSE	51600	768	107197	29	52667	FALSE	63	إنييستا : فضلت نادي الإمارات على الإنضمام إلى إنتر ميامي لأنني دائماً أختار اللعب بالمستوى الأعلى قصىف جبهة عبسي	118	{'😂': 'face with tears of joy', '👌': 'OK hand'}	{'😂': 1, '👌': 1}	2	6	['إنتر']	1
1691265004564004864	FALSE	61	7	309	3	3	15442	551195158	ar	[]	[]	['تل_ابيب']	[]	['https://twitter.com/khalediskef/status/1691265004564004864/video/1']	[]	[]	[]	[]	[]	[]	TRUE	[]	2023-08-15 01:46:13	TRUE	لحظة انفجار خزان في المنشأة الكيميائية التي حصل فيها عدة انفجارات في #تل_ابيب قبل قليل ، وسط عجز منظومات الإطفاء من إخماد الحريق . https://t.co/vCIWzhQaK1	everyone	1	2012-04-11 18:01:05	Director of the Syrian Center for Strategic Studies and Research	[]	[]	[]	United Arab Emirates	FALSE	140828	5142	84529	355	6657	FALSE	64	لحظة انفجار خزان في المنشأة الكيميائية التي حصل فيها عدة انفجارات في تل ابيب قبل قليل ، وسط عجز منظومات الإطفاء من إخماد الحريق .	130	{}	{}	0	0	[]	0
1583404693614919680	FALSE	7	1	89	0	0	0	551195158	ar	[]	[]	['إبراهيم_تراوري', 'بوركينا_فاسو']	[]	[]	[]	[]	[]	[]	[]	[]	TRUE	[]	2022-10-21 10:27:51	TRUE	النقيب #إبراهيم_تراوري يؤدي اليمين الدستورية رئيسا للمرحلة الانتقالية في #بوركينا_فاسو.	everyone	0	2012-04-11 18:01:05	Director of the Syrian Center for Strategic Studies and Research	[]	[]	[]	United Arab Emirates	FALSE	140828	5142	84529	355	6657	FALSE	89	النقيب إبراهيم تراوري يؤدي اليمين الدستورية رئيسا للمرحلة الانتقالية في بوركينا فاسو.	85	{}	{}	0	0	[]	0
1647293481885347841	FALSE	7	1	15	1	0	5836	551195158	ar	[]	[]	['بوردو']	[]	['https://twitter.com/i/web/status/1647293481885347841', 'https://twitter.com/khalediskef/status/1647293481885347841/video/1']	[]	[]	[]	[]	[]	[]	TRUE	[]	2023-04-15 17:39:05	TRUE	لقطات متداولة لاصطدام سيارة بحشد من الناس في مدينة #بوردو الفرنسية، مما تسبب بإصابة 7 أشخاص اثنان منهم بحالة حرجة. وتم القبض على سائق السيارة و3 أشخاص كانوا برفقته، حيث أغلق العديد من الأشخاص الموجودين في مكان الحادث، الطريق أمامهم كي لا يهربوا. ولا يزال الأشخاص الأربعة رهن… https://t.co/PmzLhxCY6b https://t.co/4a8jrfA5Gs	everyone	0	2012-04-11 18:01:05	Director of the Syrian Center for Strategic Studies and Research	[]	[]	[]	United Arab Emirates	FALSE	140828	5142	84529	355	6657	FALSE	139	لقطات متداولة لاصطدام سيارة بحشد من الناس في مدينة بوردو الفرنسية، مما تسبب بإصابة 7 أشخاص اثنان منهم بحالة حرجة. وتم القبض على سائق السيارة و3 أشخاص كانوا برفقته، حيث أغلق العديد من الأشخاص الموجودين في مكان الحادث، الطريق أمامهم كي لا يهربوا. ولا يزال الأشخاص الأربعة رهن	277	{}	{}	0	0	[]	0
1649709466265309184	FALSE	20	7	46	2	0	5158	551195158	ar	[]	[]	['فرنسا']	[]	['https://twitter.com/khalediskef/status/1649709466265309184/video/1']	[]	[]	[]	[]	[]	[]	TRUE	[]	2023-04-22 09:39:21	TRUE	الشرطة الفرنسية تستخدم العنف ضد المتظاهرين #فرنسا https://t.co/JJ4DigMVuz	everyone	1	2012-04-11 18:01:05	Director of the Syrian Center for Strategic Studies and Research	[]	[]	[]	United Arab Emirates	FALSE	140828	5142	84529	355	6657	FALSE	351	الشرطة الفرنسية تستخدم العنف ضد المتظاهرين فرنسا	50	{}	{}	0	0	[]	0
1642137708234514432	FALSE	8	6	37	2	1	14244	551195158	ar	['سفيان كيين']	['Person']	['بلجيكا', 'المغرب', 'سفيان_كيين']	[]	['https://twitter.com/khalediskef/status/1642137708234514432/video/1']	[]	[]	['Sport', 'Sports Team', 'Business Taxonomy', 'Unified Twitter Taxonomy', 'Unified Twitter Taxonomy', 'Unified Twitter Taxonomy', 'Unified Twitter Taxonomy']	['Types of sports, like soccer and basketball', 'A sports team organization, like Arsenal and the Boston Celtics', 'Categories within Brand Verticals that narrow down the scope of Brands', 'A taxonomy of user interests. ', 'A taxonomy of user interests. ', 'A taxonomy of user interests. ', 'A taxonomy of user interests. ']	['Soccer', 'Belgium', 'Sports & Fitness Business', 'Belgium', 'Soccer', 'Sports', "Men's national soccer teams"]	['', '', 'Brands, companies, advertisers and every non-person handle with the profit intent related to sports nutrition, athletic apparel, sports apps, fitness venues', '', '', 'Sports', 'National Soccer Teams']	TRUE	[]	2023-04-01 12:11:53	TRUE	#بلجيكا.. لحظة تحليق سيارة لاعب منتخب #المغرب لكرة القدم #سفيان_كيين واصطدامها بجدار تعرض النجم المغربي سفيان كيين، لحادث سير بعد أن حلقت سيارته في الهواء نتيجة لاصطدامها بحاجز على الطريق وهي تمشي بسرعة 200 كم في الساعة, وبعدها اصطدمت بجدار صالة رياضية https://t.co/3PV6Vah9dD	everyone	0	2012-04-11 18:01:05	Director of the Syrian Center for Strategic Studies and Research	[]	[]	[]	United Arab Emirates	FALSE	140828	5142	84529	355	6657	FALSE	403	بلجيكا.. لحظة تحليق سيارة لاعب منتخب المغرب لكرة القدم سفيان كيين واصطدامها بجدار تعرض النجم المغربي سفيان كيين، لحادث سير بعد أن حلقت سيارته في الهواء نتيجة لاصطدامها بحاجز على الطريق وهي تمشي بسرعة 200 كم في الساعة وبعدها اصطدمت بجدار صالة رياضية	251	{}	{}	0	1	[]	0
1562122807567421440	FALSE	6	0	42	1	0	0	551195158	ar	[]	[]	['الصين']	[]	['https://twitter.com/khalediskef/status/1562122807567421440/video/1']	[]	[]	[]	[]	[]	[]	TRUE	[]	2022-08-23 17:01:14	TRUE	جفاف المياه أحدى أكبر البحيرات في #الصين. https://t.co/mlaSJ7p6xl	everyone	0	2012-04-11 18:01:05	Director of the Syrian Center for Strategic Studies and Research	[]	[]	[]	United Arab Emirates	FALSE	140828	5142	84529	355	6657	FALSE	437	جفاف المياه أحدى أكبر البحيرات في الصين.	41	{}	{}	0	0	[]	0
1557789257246584832	FALSE	8	4	42	2	2	0	551195158	ar	[]	[]	['داعش', 'رحيم_الله_حقاني', 'طالبان', 'افغانستان']	[]	['https://twitter.com/khalediskef/status/1557789257246584832/video/1']	[]	[]	['Unified Twitter Taxonomy']	['A taxonomy of user interests. ']	['Crisis in Afghanistan']	['']	TRUE	[]	2022-08-11 18:01:15	TRUE	تنظيم #داعش يتبنى اغتيال "#رحيم_الله_حقاني"، أحد أبرز مرجعيات حركة #طالبان. #افغانستان https://t.co/LA6GiodKaM	everyone	1	2012-04-11 18:01:05	Director of the Syrian Center for Strategic Studies and Research	[]	[]	[]	United Arab Emirates	FALSE	140828	5142	84529	355	6657	FALSE	879	تنظيم داعش يتبنى اغتيال رحيم الله حقاني، أحد أبرز مرجعيات حركة طالبان. افغانستان	81	{}	{}	0	0	[]	0
1557076157786456064	FALSE	39	57	188	21	3	0	551195158	ar	[]	[]	['السفير_السعودي', 'محمد_القحطاني', 'القاهرة', 'السعودية']	[]	['https://twitter.com/khalediskef/status/1557076157786456064/video/1']	[]	[]	[]	[]	[]	[]	TRUE	[]	2022-08-09 18:47:39	FALSE	فيديو متداول للحظة وفاة #السفير_السعودي #محمد_القحطاني اثناء كلمة له في مؤتمر بالعاصمة المصرية #القاهرة. #السعودية https://t.co/V4Q1ItOYrS	everyone	1	2012-04-11 18:01:05	Director of the Syrian Center for Strategic Studies and Research	[]	[]	[]	United Arab Emirates	FALSE	140828	5142	84529	355	6657	FALSE	880	فيديو متداول للحظة وفاة السفير السعودي محمد القحطاني اثناء كلمة له في مؤتمر بالعاصمة المصرية القاهرة. السعودية	111	{}	{}	0	0	[]	0
1691411920861933570	FALSE	48	21	142	5	10	99793	277456749	ar	['السفارة الكويتية', 'لندن', 'الكويت', 'الكويت']	['Organization', 'Place', 'Place', 'Place']	[]	[]	['https://twitter.com/6wee6er/status/1691411920861933570/video/1']	[]	[]	['Cities']	['Cities around the world']	['London']	['london']	TRUE	[]	2023-08-15 11:30:01	TRUE	ردا على تجمع بعض العراقين امام السفارة الكويتية في لندن .. ابناء الكويت يحتشدون امام السفارة مرددين الاغاني الوطنية الحماسية و يثبتون للعام مكانة الكويت في قلب ابناءها https://t.co/R24zs6y9pv	everyone	1	2011-04-05 12:14:59	يخاطبني السفيه بكل قبح........... فأكره أن أكون له مجيبا يزيد سفاهة فأزيد حلماً...........كعود زاده الإحراق طيبا	[]	[]	[]		FALSE	32323	62	214116	41	1660	FALSE	65	ردا على تجمع بعض العراقين امام السفارة الكويتية في لندن .. ابناء الكويت يحتشدون امام السفارة مرددين الاغاني الوطنية الحماسية و يثبتون للعام مكانة الكويت في قلب ابناءها	168	{}	{}	0	4	['السفارة الكويتية']	1
1343248506509791232	FALSE	10	4	22	1	0	0	277456749	ar	['المغرب', 'الجزائر', 'تونس', 'ليبيا', 'مكه المكرمة']	['Place', 'Place', 'Place', 'Place', 'Place']	[]	[]	['https://twitter.com/6wee6er/status/1343248506509791232/photo/1']	[]	[]	['Place']	['Named places in the world, like Fenway Park']	['Tunisia (تونس)']	['']	TRUE	[]	2020-12-27 17:32:54	TRUE	الحجاج كانوا يأتون من المغرب ليقابلوا حجاج الجزائر .. ثم تونس .. ثم ليبيا .. ليقابلوا الحجاج المصريين ويسيروا سوياً إلى مكه المكرمة. صوره التقطها مصور فرنسى من الجو لحُجاج بيت الله وهم بالقرب من قرية الجحفة بالحجاز ، وقبيل تفعيل حدود سايكس بيكو فلا جوزات ولا تأشيرات مرور https://t.co/50M8hifdMC	everyone	1	2011-04-05 12:14:59	يخاطبني السفيه بكل قبح........... فأكره أن أكون له مجيبا يزيد سفاهة فأزيد حلماً...........كعود زاده الإحراق طيبا	[]	[]	[]		FALSE	32323	62	214116	41	1660	FALSE	702	الحجاج كانوا يأتون من المغرب ليقابلوا حجاج الجزائر .. ثم تونس .. ثم ليبيا .. ليقابلوا الحجاج المصريين ويسيروا سوياً إلى مكه المكرمة. صوره التقطها مصور فرنسى من الجو لحُجاج بيت الله وهم بالقرب من قرية الجحفة بالحجاز ، وقبيل تفعيل حدود سايكس بيكو فلا جوزات ولا تأشيرات مرور	274	{}	{}	0	5	[]	0
1689974918379712512	FALSE	67	17	492	10	5	87306	831984447096500224	ar	[]	[]	[]	[]	['https://twitter.com/soldier2017kg/status/1689974918379712512/video/1']	[]	[]	[]	[]	[]	[]	TRUE	[]	2023-08-11 12:19:53	TRUE	🎖️تشيلي : حريق الغابات خرجت عن نطاق السيطرة في سانتا خوانا https://t.co/skdH8egrut	everyone	1	2017-02-15 21:52:04	من الرياض مع الحدث أولاً بأول	[]	[]	[]	المملكة العربية السعودية	FALSE	952081	0	27870	1020	6295	FALSE	67	تشيلي : حريق الغابات خرجت عن نطاق السيطرة في سانتا خوانا	59	{'🎖️': 'military medal'}	{'🎖️': 1}	1	0	[]	0
1673486471393845249	FALSE	224	91	1705	23	71	1025719	831984447096500224	ar	['جو بايدن']	['Person']	[]	[]	['https://twitter.com/soldier2017kg/status/1673486471393845249/video/1']	[]	[]	['Person', 'Politician', 'Unified Twitter Taxonomy', 'Unified Twitter Taxonomy', 'Unified Twitter Taxonomy']	['Named people in the world like Nelson Mandela', 'Politicians in the world, like Joe Biden', 'A taxonomy of user interests. ', 'A taxonomy of user interests. ', 'A taxonomy of user interests. ']	['Joe Biden', 'Joe Biden', 'Joe Biden', 'Politics', 'Political figures']	['US President Joe Biden', 'US President Joe Biden', 'US President Joe Biden', 'Politics', 'Politician']	TRUE	[]	2023-06-27 00:20:41	TRUE	🎖️ الرئيس الأمريكي جو بايدن: "لقد بعت الكثير من أسرار الدولة وأشياء مهمة للغاية". https://t.co/fEiBeGYs95	everyone	1	2017-02-15 21:52:04	من الرياض مع الحدث أولاً بأول	[]	[]	[]	المملكة العربية السعودية	FALSE	952081	0	27870	1020	6295	FALSE	175	الرئيس الأمريكي جو بايدن: لقد بعت الكثير من أسرار الدولة وأشياء مهمة للغاية.	79	{'🎖️': 'military medal'}	{'🎖️': 1}	1	1	[]	0
1664558387546185728	FALSE	124	629	1078	203	126	1450509	831984447096500224	ar	['باريس']	['Place']	[]	[]	['https://twitter.com/soldier2017kg/status/1664558387546185728/video/1']	[]	[]	[]	[]	[]	[]	TRUE	[]	2023-06-02 09:03:40	TRUE	🎖️هكذا يبدو قوس النصر رمز الجندي المجهول في باريس https://t.co/Ndq17xdaR0	everyone	1	2017-02-15 21:52:04	من الرياض مع الحدث أولاً بأول	[]	[]	[]	المملكة العربية السعودية	FALSE	952081	0	27870	1020	6295	FALSE	244	هكذا يبدو قوس النصر رمز الجندي المجهول في باريس	48	{'🎖️': 'military medal'}	{'🎖️': 1}	1	1	[]	0
1674815680015654917	FALSE	43	20	610	6	8	150043	831984447096500224	ar	['ومارك زوكربيرج', 'الكولوسيوم', 'روما', 'بمصارع', 'روما']	['Person', 'Place', 'Place', 'Place', 'Place']	[]	[]	['https://twitter.com/soldier2017kg/status/1674815680015654917/photo/1', 'https://twitter.com/soldier2017kg/status/1674815680015654917/photo/1']	[]	[]	['Business Taxonomy', 'Business Taxonomy', 'Person', 'Interests and Hobbies Vertical', 'Interests and Hobbies Category', 'Unified Twitter Taxonomy', 'Unified Twitter Taxonomy', 'Unified Twitter Taxonomy']	['Categories within Brand Verticals that narrow down the scope of Brands', 'Categories within Brand Verticals that narrow down the scope of Brands', 'Named people in the world like Nelson Mandela', 'Top level interests and hobbies groupings, like Food or Travel', 'A grouping of interests and hobbies entities, like Novelty Food or Destinations', 'A taxonomy of user interests. ', 'A taxonomy of use…	['Financial Services Business', 'Technology Business', 'Elon Musk', 'Business & finance', 'Leadership', 'Elon Musk', 'Tech personalities', 'Business personalities']	['Brands, companies, advertisers and every non-person handle with the profit intent related to Banks, Credit cards, Insurance, Investments, Stocks ', 'Brands, companies, advertisers and every non-person handle with the profit intent related to softwares, apps, communication equipments, hardwares', 'Elon Musk', '', 'Leadership', 'Elon Musk', 'Tech Professionals', '']	TRUE	[]	2023-06-30 16:22:29	TRUE	🎖️ عرضت الحكومة الإيطالية على إيلون ماسك ومارك زوكربيرج القتال في الكولوسيوم في روما كما يليق بمصارع. 🔺لمئات السنين ، لم يتم عقد أي أحداث رئيسية في المكان التاريخي المعروف باسم "ساحة الموت في روما" وفي مسرح المعارك المصارعة. https://t.co/d5gRNOXr46	everyone	1	2017-02-15 21:52:04	من الرياض مع الحدث أولاً بأول	[]	[]	[]	المملكة العربية السعودية	FALSE	952081	0	27870	1020	6295	FALSE	68	عرضت الحكومة الإيطالية على إيلون ماسك ومارك زوكربيرج القتال في الكولوسيوم في روما كما يليق بمصارع. لمئات السنين ، لم يتم عقد أي أحداث رئيسية في المكان التاريخي المعروف باسم ساحة الموت في روما وفي مسرح المعارك المصارعة.	221	{'🔺': 'red triangle pointed up', '🎖️': 'military medal'}	{'🔺': 1, '🎖️': 1}	2	5	[]	0
1524775748011180035	FALSE	60	5	1298	1	1	0	831984447096500224	ar	[]	[]	[]	[]	[]	[]	[]	[]	[]	[]	[]	TRUE	[]	2022-05-12 15:37:21	TRUE	🎖انفجارات في مدينة أوديسا	everyone	0	2017-02-15 21:52:04	من الرياض مع الحدث أولاً بأول	[]	[]	[]	المملكة العربية السعودية	FALSE	952081	0	27870	1020	6295	FALSE	127	انفجارات في مدينة أوديسا	24	{'🎖': 'military medal'}	{'🎖': 1}	1	0	[]	0
1672359604729049091	FALSE	113	38	1149	16	13	351011	831984447096500224	ar	[]	[]	[]	[]	['https://twitter.com/soldier2017kg/status/1672359604729049091/video/1']	[]	[]	[]	[]	[]	[]	TRUE	[]	2023-06-23 21:42:55	TRUE	🎖️ موكب بوتين يتوجه بشكل عاجل إلى الكرملين https://t.co/Ybx2LrRBHR	everyone	1	2017-02-15 21:52:04	من الرياض مع الحدث أولاً بأول	[]	[]	[]	المملكة العربية السعودية	FALSE	952081	0	27870	1020	6295	FALSE	181	موكب بوتين يتوجه بشكل عاجل إلى الكرملين	41	{'🎖️': 'military medal'}	{'🎖️': 1}	1	0	[]	0
1671942885992812545	FALSE	58	83	1072	20	33	571624	831984447096500224	ar	[]	[]	[]	[]	['https://twitter.com/soldier2017kg/status/1671942885992812545/photo/1']	[]	[]	[]	[]	[]	[]	TRUE	[]	2023-06-22 18:07:01	TRUE	🎖️ تم اكتشاف موقع حطام بالقرب من تيتانيك بواسطة مركبة تعمل عن بعد https://t.co/0X05h7tqjL	everyone	1	2017-02-15 21:52:04	من الرياض مع الحدث أولاً بأول	[]	[]	[]	المملكة العربية السعودية	FALSE	952081	0	27870	1020	6295	FALSE	186	تم اكتشاف موقع حطام بالقرب من تيتانيك بواسطة مركبة تعمل عن بعد	64	{'🎖️': 'military medal'}	{'🎖️': 1}	1	0	[]	0
1659248613350834205	FALSE	60	54	722	15	8	200219	831984447096500224	ar	['بشار الأسد', 'جدة']	['Person', 'Place']	['الإخبارية']	[]	['https://twitter.com/soldier2017kg/status/1659248613350834205/video/1']	[]	[]	['Person', 'Politician', 'Unified Twitter Taxonomy', 'Unified Twitter Taxonomy', 'Unified Twitter Taxonomy']	['Named people in the world like Nelson Mandela', 'Politicians in the world, like Joe Biden', 'A taxonomy of user interests. ', 'A taxonomy of user interests. ', 'A taxonomy of user interests. ']	['Bashar al-Assad', 'Bashar al-Assad', 'Politics', 'Political figures', 'Bashar al-Assad']	['Syrian President Bashar al-Assad', 'Syrian President Bashar al-Assad', 'Politics', 'Politician', 'Syrian President Bashar al-Assad']	TRUE	[]	2023-05-18 17:24:31	TRUE	🎖️ وصول الرئيس السوري بشار الأسد إلى جدة للمشاركة في القمة العربية الـ 32 #الإخبارية https://t.co/PqaDYXYdj6	everyone	0	2017-02-15 21:52:04	من الرياض مع الحدث أولاً بأول	[]	[]	[]	المملكة العربية السعودية	FALSE	952081	0	27870	1020	6295	FALSE	295	وصول الرئيس السوري بشار الأسد إلى جدة للمشاركة في القمة العربية الـ 32 الإخبارية	83	{'🎖️': 'military medal'}	{'🎖️': 1}	1	2	[]	0
1657895072204042242	FALSE	113	185	1076	46	22	527387	831984447096500224	ar	['جورج سوروس']	['Person']	[]	[]	['https://twitter.com/soldier2017kg/status/1657895072204042242/photo/1']	[]	[]	[]	[]	[]	[]	TRUE	[]	2023-05-14 23:46:02	TRUE	🎖️ توفي جورج سوروس بنوبة قلبية عنيفة بحسب بوليتيكس فور أوول إيرلندا. https://t.co/Eq4evYPCqy	everyone	1	2017-02-15 21:52:04	من الرياض مع الحدث أولاً بأول	[]	[]	[]	المملكة العربية السعودية	FALSE	952081	0	27870	1020	6295	FALSE	296	توفي جورج سوروس بنوبة قلبية عنيفة بحسب بوليتيكس فور أوول إيرلندا.	68	{'🎖️': 'military medal'}	{'🎖️': 1}	1	1	[]	0
1657880131535339522	FALSE	128	297	1390	52	31	844245	831984447096500224	ar	['جورج سوروس']	['Person']	[]	[]	['https://twitter.com/soldier2017kg/status/1657880131535339522/photo/1']	[]	[]	[]	[]	[]	[]	TRUE	[]	2023-05-14 22:46:39	TRUE	🎖️أنباء غير مؤكدة : وفاة جورج سوروس https://t.co/4YJDXr7hKT	everyone	1	2017-02-15 21:52:04	من الرياض مع الحدث أولاً بأول	[]	[]	[]	المملكة العربية السعودية	FALSE	952081	0	27870	1020	6295	FALSE	296	أنباء غير مؤكدة : وفاة جورج سوروس	35	{'🎖️': 'military medal'}	{'🎖️': 1}	1	1	[]	0
1657825858688630787	FALSE	164	222	1656	63	61	1193998	831984447096500224	ar	['كمال كيلجدار']	['Person']	[]	[]	['https://twitter.com/soldier2017kg/status/1657825858688630787/video/1']	[]	[]	[]	[]	[]	[]	TRUE	[]	2023-05-14 19:11:00	TRUE	🎖️خرج أنصار كمال كيلجدار أوغلو للاحتفال https://t.co/sEzI8Ar9bo	everyone	1	2017-02-15 21:52:04	من الرياض مع الحدث أولاً بأول	[]	[]	[]	المملكة العربية السعودية	FALSE	952081	0	27870	1020	6295	FALSE	297	خرج أنصار كمال كيلجدار أوغلو للاحتفال	38	{'🎖️': 'military medal'}	{'🎖️': 1}	1	1	[]	0
1654981073896341505	FALSE	364	259	2727	69	54	1258988	831984447096500224	ar	['إيران']	['Place']	[]	[]	[]	[]	[]	['Unified Twitter Taxonomy', 'Unified Twitter Taxonomy', 'Unified Twitter Taxonomy']	['A taxonomy of user interests. ', 'A taxonomy of user interests. ', 'A taxonomy of user interests. ']	['Global security & terrorism', 'Politics', 'Political issues']	['Global conversation about threats of terrorism, response of governments, and national security ', 'Politics', 'Political issues']	TRUE	[]	2023-05-06 22:46:50	TRUE	🎖️ إيران : تعلن عن قطع مساعداتها المالية عن حركة حماس والجهاد الاسلامي	everyone	1	2017-02-15 21:52:04	من الرياض مع الحدث أولاً بأول	[]	[]	[]	المملكة العربية السعودية	FALSE	952081	0	27870	1020	6295	FALSE	313	إيران : تعلن عن قطع مساعداتها المالية عن حركة حماس والجهاد الاسلامي	69	{'🎖️': 'military medal'}	{'🎖️': 1}	1	1	[]	0
1650296889164570624	FALSE	467	477	3277	99	145	2493109	831984447096500224	ar	['فرنسا']	['Place']	[]	[]	['https://twitter.com/soldier2017kg/status/1650296889164570624/video/1']	[]	[]	[]	[]	[]	[]	TRUE	[]	2023-04-24 00:33:34	TRUE	🎖️يحدث في فرنسا : https://t.co/2jxBwvs7mh	everyone	1	2017-02-15 21:52:04	من الرياض مع الحدث أولاً بأول	[]	[]	[]	المملكة العربية السعودية	FALSE	952081	0	27870	1020	6295	FALSE	351	يحدث في فرنسا :	16	{'🎖️': 'military medal'}	{'🎖️': 1}	1	1	[]	0
1646456507410546688	FALSE	259	143	3111	48	28	868926	831984447096500224	ar	[]	[]	[]	[]	['https://twitter.com/soldier2017kg/status/1646456507410546688/photo/1']	[]	[]	[]	[]	[]	[]	TRUE	[]	2023-04-13 10:13:15	TRUE	🎖️ الرئيس الصيني مخاطباً الجيش بالزي العسكري: "استعدوا للعمليات القتالية الحقيقية" https://t.co/1xwzYn5GSn	everyone	1	2017-02-15 21:52:04	من الرياض مع الحدث أولاً بأول	[]	[]	[]	المملكة العربية السعودية	FALSE	952081	0	27870	1020	6295	FALSE	369	الرئيس الصيني مخاطباً الجيش بالزي العسكري: استعدوا للعمليات القتالية الحقيقية	80	{'🎖️': 'military medal'}	{'🎖️': 1}	1	0	[]	0
1644845377919565827	FALSE	315	198	1705	72	65	1315423	831984447096500224	ar	['السعودية']	['Place']	[]	[]	['https://twitter.com/soldier2017kg/status/1644845377919565827/photo/1', 'https://twitter.com/soldier2017kg/status/1644845377919565827/photo/1']	[]	[]	[]	[]	[]	[]	TRUE	[]	2023-04-08 23:31:12	TRUE	🎖️ وسائل إعلام إيرانية: إزالة اللوحات التي تحمل إسم نمر النمر من الشوارع التي تقع أمام القنصلية السعودية https://t.co/TzdTfibeIo	everyone	1	2017-02-15 21:52:04	من الرياض مع الحدث أولاً بأول	[]	[]	[]	المملكة العربية السعودية	FALSE	952081	0	27870	1020	6295	FALSE	377	وسائل إعلام إيرانية: إزالة اللوحات التي تحمل إسم نمر النمر من الشوارع التي تقع أمام القنصلية السعودية	105	{'🎖️': 'military medal'}	{'🎖️': 1}	1	1	[]	0
1639046011376074754	FALSE	685	322	4529	83	54	969957	831984447096500224	ar	['فرنسا']	['Place']	[]	[]	['https://twitter.com/soldier2017kg/status/1639046011376074754/video/1']	[]	[]	[]	[]	[]	[]	TRUE	[]	2023-03-23 23:26:35	TRUE	🎖️مظاهرات فرنسا https://t.co/eAC6gUsAnC	everyone	1	2017-02-15 21:52:04	من الرياض مع الحدث أولاً بأول	[]	[]	[]	المملكة العربية السعودية	FALSE	952081	0	27870	1020	6295	FALSE	419	مظاهرات فرنسا	14	{'🎖️': 'military medal'}	{'🎖️': 1}	1	1	[]	0
1637534829519552513	FALSE	249	78	1582	28	28	454797	831984447096500224	ar	['ترامب', 'نيويورك']	['Person', 'Place']	[]	[]	['https://twitter.com/soldier2017kg/status/1637534829519552513/video/1']	[]	[]	['Cities']	['Cities around the world']	['New York City']	['New York City']	TRUE	[]	2023-03-19 19:21:41	TRUE	🎖️أنصار ترامب أمام برجه بمدينة نيويورك https://t.co/tpPPMqrfou	everyone	1	2017-02-15 21:52:04	من الرياض مع الحدث أولاً بأول	[]	[]	[]	المملكة العربية السعودية	FALSE	952081	0	27870	1020	6295	FALSE	423	أنصار ترامب أمام برجه بمدينة نيويورك	37	{'🎖️': 'military medal'}	{'🎖️': 1}	1	2	[]	0
1596257212267057152	FALSE	422	266	3836	103	90	0	831984447096500224	ar	[]	[]	[]	[]	['https://twitter.com/soldier2017kg/status/1596257212267057152/photo/1', 'https://twitter.com/soldier2017kg/status/1596257212267057152/photo/1']	[]	[]	['Sports Event', 'Sports Event', 'Sport', 'Sports Team', 'Sports League', 'Sports League', 'Sports League', 'Events [Entity Service]', 'Events [Entity Service]', 'Sports Series', 'Soccer Match', 'Business Taxonomy', 'Unified Twitter Taxonomy', 'Unified Twitter Taxonomy', 'Unified Twitter Taxonomy', 'Unified Twitter Taxonomy', 'Unified Twitter Taxonomy', 'Unified Twitter Taxonomy', 'Unified Twitte…	['', '', 'Types of sports, like soccer and basketball', 'A sports team organization, like Arsenal and the Boston Celtics', '', '', '', 'Real world events. ', 'Real world events. ', 'A grouping of sports events or series, for example 2014 pre-season, a tournament, or round', 'Sports Event specific to Soccer matches', 'Categories within Brand Verticals that narrow down the scope of Brands', 'A taxo…	['2022 FIFA World Cup', 'Poland vs Saudi Arabia', 'Soccer', 'Saudi Arabia', 'International - Soccer', '2022 FIFA World Cup', "FIFA Men's World Cup", '2022 FIFA World Cup', 'Poland vs Saudi Arabia', '2022 FIFA World Cup', 'Poland vs Saudi Arabia', 'Sports & Fitness Business', 'Saudi Arabia', 'Soccer', 'Sports', "Men's national soccer teams", 'Sports events', "FIFA Men's World Cup", 'Events']	['', '', '', '', '', '', '', '', '', '', '', 'Brands, companies, advertisers and every non-person handle with the profit intent related to sports nutrition, athletic apparel, sports apps, fitness venues', '', '', 'Sports', 'National Soccer Teams', '', '', '']	TRUE	[]	2022-11-25 21:39:11	TRUE	🎖مدرب المنتخب السعودي : أتمنى من مدرب بولندا الإهتمام بنظامه الغذائي بدلًا من الإستنقاص بفريقنا https://t.co/Cq0gZLZpT0	everyone	1	2017-02-15 21:52:04	من الرياض مع الحدث أولاً بأول	[]	[]	[]	المملكة العربية السعودية	FALSE	952081	0	27870	1020	6295	FALSE	628	مدرب المنتخب السعودي : أتمنى من مدرب بولندا الإهتمام بنظامه الغذائي بدلًا من الإستنقاص بفريقنا	96	{'🎖': 'military medal'}	{'🎖': 1}	1	0	[]	0
1588815744812326913	FALSE	1168	195	6024	76	87	0	831984447096500224	ar	['ترامب']	['Person']	[]	[]	['https://twitter.com/soldier2017kg/status/1588815744812326913/photo/1']	[]	[]	[]	[]	[]	[]	TRUE	[]	2022-11-05 08:49:26	TRUE	🎖 ترامب: قضت المحكمة العليا في بنسلفانيا للتو بأن انتخابات 2020 كانت `` مزورة ''. https://t.co/e0VsLJu0NB	everyone	1	2017-02-15 21:52:04	من الرياض مع الحدث أولاً بأول	[]	[]	[]	المملكة العربية السعودية	FALSE	952081	0	27870	1020	6295	FALSE	683	ترامب: قضت المحكمة العليا في بنسلفانيا للتو بأن انتخابات 2020 كانت مزورة .	79	{'🎖': 'military medal'}	{'🎖': 1}	1	1	[]	0
1581850777844187138	FALSE	47	33	377	11	3	0	831984447096500224	ar	['أوروبا']	['Place']	[]	[]	['https://twitter.com/soldier2017kg/status/1581850777844187138/photo/1']	[]	[]	[]	[]	[]	[]	TRUE	[]	2022-10-17 03:33:09	TRUE	🎖 القاذفات الأمريكية النووية B-52 تحلق فوق أوروبا استعدادًا لتدريبات الناتو النووية. https://t.co/yLCuvnG1sr	everyone	1	2017-02-15 21:52:04	من الرياض مع الحدث أولاً بأول	[]	[]	[]	المملكة العربية السعودية	FALSE	952081	0	27870	1020	6295	FALSE	712	القاذفات الأمريكية النووية 52 تحلق فوق أوروبا استعدادًا لتدريبات الناتو النووية.	82	{'🎖': 'military medal'}	{'🎖': 1}	1	1	[]	0
1578408022778548224	FALSE	505	97	2899	32	90	0	831984447096500224	ar	[]	[]	[]	[]	['https://twitter.com/soldier2017kg/status/1578408022778548224/video/1']	[]	[]	[]	[]	[]	[]	TRUE	[]	2022-10-07 15:32:52	TRUE	🎖 وسائل الإعلام الروسية اكتشفت مروحية روسية غواصة أمريكية في القطب الشمالي بعد خروجها الطارئ على سطح الجليد https://t.co/eFFmzlcyhN	everyone	1	2017-02-15 21:52:04	من الرياض مع الحدث أولاً بأول	[]	[]	[]	المملكة العربية السعودية	FALSE	952081	0	27870	1020	6295	FALSE	736	وسائل الإعلام الروسية اكتشفت مروحية روسية غواصة أمريكية في القطب الشمالي بعد خروجها الطارئ على سطح الجليد	108	{'🎖': 'military medal'}	{'🎖': 1}	1	0	[]	0
1575941099616600090	FALSE	594	402	6778	202	65	0	831984447096500224	ar	['الناتو', 'روسيا']	['Place', 'Place']	[]	[]	[]	[]	[]	[]	[]	[]	[]	TRUE	[]	2022-09-30 20:10:12	TRUE	🎖 ميدفيديف: إذا لم يتم قبول أوكرانيا في الناتو ، فيمكننا قبولها في روسيا	everyone	1	2017-02-15 21:52:04	من الرياض مع الحدث أولاً بأول	[]	[]	[]	المملكة العربية السعودية	FALSE	952081	0	27870	1020	6295	FALSE	758	ميدفيديف: إذا لم يتم قبول أوكرانيا في الناتو ، فيمكننا قبولها في روسيا	73	{'🎖': 'military medal'}	{'🎖': 1}	1	2	[]	0
1574057030347853825	FALSE	187	79	1330	13	18	0	831984447096500224	ar	['أوروبا', 'اليونان']	['Place', 'Place']	[]	[]	['https://twitter.com/soldier2017kg/status/1574057030347853825/video/1']	[]	[]	[]	[]	[]	[]	TRUE	[]	2022-09-25 15:23:35	TRUE	🎖فديو متداول لعشرات الآلاف من المهاجرين غير الشرعيين في طريقهم إلى أوروبا عبر اليونان. https://t.co/NaSjipph8c	everyone	1	2017-02-15 21:52:04	من الرياض مع الحدث أولاً بأول	[]	[]	[]	المملكة العربية السعودية	FALSE	952081	0	27870	1020	6295	FALSE	783	فديو متداول لعشرات الآلاف من المهاجرين غير الشرعيين في طريقهم إلى أوروبا عبر اليونان.	86	{'🎖': 'military medal'}	{'🎖': 1}	1	2	[]	0
1573645559155539979	FALSE	221	92	2127	26	13	0	831984447096500224	ar	['أوكرانيا']	['Place']	[]	[]	['https://twitter.com/soldier2017kg/status/1573645559155539979/photo/1']	[]	[]	['Ongoing News Story']	["Ongoing News Stories like 'Brexit'"]	['Russo-Ukrainian conflict']	['']	TRUE	[]	2022-09-24 12:08:32	TRUE	🎖تعزيزات عسكرية روسية تتجه إلى أوكرانيا https://t.co/r1bi4Pcc7J	everyone	1	2017-02-15 21:52:04	من الرياض مع الحدث أولاً بأول	[]	[]	[]	المملكة العربية السعودية	FALSE	952081	0	27870	1020	6295	FALSE	788	تعزيزات عسكرية روسية تتجه إلى أوكرانيا	39	{'🎖': 'military medal'}	{'🎖': 1}	1	1	[]	0
1572564997171204097	FALSE	347	95	3644	55	34	0	831984447096500224	ar	[]	[]	[]	[]	[]	[]	[]	[]	[]	[]	[]	TRUE	[]	2022-09-21 12:34:46	TRUE	🎖 حظر مغادرة البلاد لجميع الرجال الروس الذين تتراوح أعمارهم بين 18 و 65 عامًا بسبب التعبئة الجزئية.	everyone	1	2017-02-15 21:52:04	من الرياض مع الحدث أولاً بأول	[]	[]	[]	المملكة العربية السعودية	FALSE	952081	0	27870	1020	6295	FALSE	790	حظر مغادرة البلاد لجميع الرجال الروس الذين تتراوح أعمارهم بين 18 و 65 عامًا بسبب التعبئة الجزئية.	98	{'🎖': 'military medal'}	{'🎖': 1}	1	0	[]	0
1573966169140301824	FALSE	464	100	2562	68	57	0	831984447096500224	ar	['الاتحاد', 'إيطاليا']	['Organization', 'Place']	[]	[]	['https://twitter.com/soldier2017kg/status/1573966169140301824/video/1']	[]	[]	[]	[]	[]	[]	TRUE	[]	2022-09-25 09:22:32	TRUE	🎖إيطاليا : صعد المتظاهرون إلى مقر الاتحاد الأوروبي في روما ومزقوا علم "الاتحاد" وتم استبداله بالعلم الإيطالي تجري اليوم الانتخابات العامة في إيطاليا ، والتي قد يفوز فيها اليمين المحافظ لأول مرة منذ الحرب العالمية الثانية خليفة موسيليني https://t.co/X9AmPcrSug	everyone	1	2017-02-15 21:52:04	من الرياض مع الحدث أولاً بأول	[]	[]	[]	المملكة العربية السعودية	FALSE	952081	0	27870	1020	6295	FALSE	791	إيطاليا : صعد المتظاهرون إلى مقر الاتحاد الأوروبي في روما ومزقوا علم الاتحاد وتم استبداله بالعلم الإيطالي تجري اليوم الانتخابات العامة في إيطاليا ، والتي قد يفوز فيها اليمين المحافظ لأول مرة منذ الحرب العالمية الثانية خليفة موسيليني	239	{'🎖': 'military medal'}	{'🎖': 1}	1	2	['الاتحاد']	1
1570106321071906818	FALSE	82	16	968	6	19	0	831984447096500224	ar	['الولايات المتحدة الأمريكية', 'كاليفورنيا']	['Place', 'Place']	[]	[]	['https://twitter.com/soldier2017kg/status/1570106321071906818/video/1']	[]	[]	['States']	['States, provinces, or prefectures, like California or Fukushima Prefecture']	['California']	['California']	TRUE	[]	2022-09-14 17:44:52	TRUE	🎖 الولايات المتحدة الأمريكية: طائرة إطفاء ضخمة في محاولة لإخماد حريق هائل ينتشر نحو مناطق مأهولة بالسكان في كاليفورنيا. https://t.co/WxCwmKxh7A	everyone	1	2017-02-15 21:52:04	من الرياض مع الحدث أولاً بأول	[]	[]	[]	المملكة العربية السعودية	FALSE	952081	0	27870	1020	6295	FALSE	825	الولايات المتحدة الأمريكية: طائرة إطفاء ضخمة في محاولة لإخماد حريق هائل ينتشر نحو مناطق مأهولة بالسكان في كاليفورنيا.	119	{'🎖': 'military medal'}	{'🎖': 1}	1	2	[]	0
1569001765680418817	FALSE	29	20	244	4	3	0	831984447096500224	ar	[]	[]	[]	[]	['https://twitter.com/soldier2017kg/status/1569001765680418817/video/1']	[]	[]	[]	[]	[]	[]	TRUE	[]	2022-09-11 16:35:46	TRUE	🎖بيلغورد الروسية 🔥 https://t.co/WVBOEWsKFl	everyone	1	2017-02-15 21:52:04	من الرياض مع الحدث أولاً بأول	[]	[]	[]	المملكة العربية السعودية	FALSE	952081	0	27870	1020	6295	FALSE	832	بيلغورد الروسية	17	{'🔥': 'fire', '🎖': 'military medal'}	{'🔥': 1, '🎖': 1}	2	0	[]	0
1689965329659613184	FALSE	46	87	998	78	46	324821	764961945560678400	ar	['روما']	['Organization']	[]	[]	['https://twitter.com/CelebsArabic/status/1689965329659613184/photo/1']	[]	[]	['Business Taxonomy', 'Business Taxonomy', 'Brand', 'Brand', 'Unified Twitter Taxonomy', 'Person', 'Interests and Hobbies Vertical', 'Interests and Hobbies Category', 'Unified Twitter Taxonomy', 'Unified Twitter Taxonomy', 'Unified Twitter Taxonomy']	['Categories within Brand Verticals that narrow down the scope of Brands', 'Categories within Brand Verticals that narrow down the scope of Brands', 'Brands and Companies', 'Brands and Companies', 'A taxonomy of user interests. ', 'Named people in the world like Nelson Mandela', 'Top level interests and hobbies groupings, like Food or Travel', 'A grouping of interests and hobbies entities, like N…	['Financial Services Business', 'Technology Business', 'Celebs Arabic', 'X - the everything app', 'Technology', 'Elon Musk', 'Business & finance', 'Leadership', 'Elon Musk', 'Tech personalities', 'Business personalities']	['Brands, companies, advertisers and every non-person handle with the profit intent related to Banks, Credit cards, Insurance, Investments, Stocks ', 'Brands, companies, advertisers and every non-person handle with the profit intent related to softwares, apps, communication equipments, hardwares', '', '', 'Technology and computing', 'Elon Musk', '', 'Leadership', 'Elon Musk', 'Tech Professionals'…	TRUE	[]	2023-08-11 11:41:47	TRUE	عاجل ورسميًا: روما توافق على اقامة قتال ايلون ماسك ومارك زاكربيرغ في كولوسيوم. سيتم بث القتال على X وMeta. لم يتم تحديد الموعد بعد. https://t.co/BTXPipsRGE	everyone	1	2016-08-14 23:08:34	منصة ترفيهية لأخبار وتحديثات مشاهير العالم. للتواصل والإعلانات التجارية ✉️: https://t.co/mHNFlCq8Gq	['https://wa.me/message/KEWPHMYJ7ELXC1']	[]	[]	Middle East	FALSE	1520788	140	36759	1066	1130	FALSE	68	عاجل ورسميًا: روما توافق على اقامة قتال ايلون ماسك ومارك زاكربيرغ في كولوسيوم. سيتم بث القتال على و. لم يتم تحديد الموعد بعد.	129	{}	{}	0	1	['روما']	1
1672523665022255104	FALSE	29	136	748	70	68	777980	764961945560678400	ar	[]	[]	[]	[]	['https://twitter.com/CelebsArabic/status/1672523665022255104/photo/1']	[]	[]	['Brand']	['Brands and Companies']	['Celebs Arabic']	['']	TRUE	[]	2023-06-24 08:34:50	TRUE	شركة الغواصات 'OceanGate' المصنّعة للغواصة المفقودة: "لدينا وظيفة جديدة شاغرة.. قائد غواصة". https://t.co/XYcVdzDpEh	everyone	1	2016-08-14 23:08:34	منصة ترفيهية لأخبار وتحديثات مشاهير العالم. للتواصل والإعلانات التجارية ✉️: https://t.co/mHNFlCq8Gq	['https://wa.me/message/KEWPHMYJ7ELXC1']	[]	[]	Middle East	FALSE	1520788	140	36759	1066	1130	FALSE	177	شركة الغواصات المصنّعة للغواصة المفقودة: لدينا وظيفة جديدة شاغرة.. قائد غواصة.	82	{}	{}	0	0	[]	0
1653159326188437504	FALSE	31	116	499	70	104	407782	764961945560678400	ar	[]	[]	[]	[]	['https://twitter.com/CelebsArabic/status/1653159326188437504/video/1']	[]	[]	['Person', 'Politician', 'Brand', 'Unified Twitter Taxonomy', 'Unified Twitter Taxonomy', 'Unified Twitter Taxonomy', 'Political Body', 'Unified Twitter Taxonomy', 'Unified Twitter Taxonomy', 'Unified Twitter Taxonomy']	['Named people in the world like Nelson Mandela', 'Politicians in the world, like Joe Biden', 'Brands and Companies', 'A taxonomy of user interests. ', 'A taxonomy of user interests. ', 'A taxonomy of user interests. ', 'A section of a government, like The Supreme Court', 'A taxonomy of user interests. ', 'A taxonomy of user interests. ', 'A taxonomy of user interests. ']	['Joe Biden', 'Joe Biden', 'Celebs Arabic', 'Joe Biden', 'Politics', 'Political figures', 'The White House', 'Politics', 'The White House', 'Government institutions']	['US President Joe Biden', 'US President Joe Biden', '', 'US President Joe Biden', 'Politics', 'Politician', 'Conversation from and about the White House, both as a destination and as political voice', 'Politics', 'Conversation from and about the White House, both as a destination and as political voice', 'Political Body']	TRUE	[]	2023-05-01 22:07:52	TRUE	جو بايدن يقيم احتفال عيد الفطر المبارك في البيت الأبيض. https://t.co/ciJD8c2GaN	everyone	0	2016-08-14 23:08:34	منصة ترفيهية لأخبار وتحديثات مشاهير العالم. للتواصل والإعلانات التجارية ✉️: https://t.co/mHNFlCq8Gq	['https://wa.me/message/KEWPHMYJ7ELXC1']	[]	[]	Middle East	FALSE	1520788	140	36759	1066	1130	FALSE	134	جو بايدن يقيم احتفال عيد الفطر المبارك في البيت الأبيض.	56	{}	{}	0	0	[]	0
1659011698303332354	FALSE	43	117	1321	66	80	856962	764961945560678400	ar	[]	[]	[]	[]	['https://twitter.com/CelebsArabic/status/1659011698303332354/photo/1']	[]	[]	['Person', 'Brand', 'Actor', 'Unified Twitter Taxonomy', 'Unified Twitter Taxonomy']	['Named people in the world like Nelson Mandela', 'Brands and Companies', 'An actor or actress in the world, like Kate Winslet or Leonardo DiCaprio', 'A taxonomy of user interests. ', 'A taxonomy of user interests. ']	['Adel Imam', 'Celebs Arabic', 'Adel Imam', 'Adel Imam', 'Egyptian actors']	['', '', '', '', '']	TRUE	[]	2023-05-18 01:43:06	TRUE	عادل امام في أحدث ظهور بمناسبة عيد ميلاده الـ83 ❤️ https://t.co/wUdOlddkG1	everyone	0	2016-08-14 23:08:34	منصة ترفيهية لأخبار وتحديثات مشاهير العالم. للتواصل والإعلانات التجارية ✉️: https://t.co/mHNFlCq8Gq	['https://wa.me/message/KEWPHMYJ7ELXC1']	[]	[]	Middle East	FALSE	1520788	140	36759	1066	1130	FALSE	285	عادل امام في أحدث ظهور بمناسبة عيد ميلاده الـ83	49	{'❤️': 'red heart'}	{'❤️': 1}	1	0	[]	0
1243267101860728832	FALSE	2257	915	12245	2240	117	0	764961945560678400	ar	[]	[]	[]	[]	['https://twitter.com/CelebsArabic/status/1243267101860728832/photo/1']	[]	[]	['Sport', 'Brand', 'Unified Twitter Taxonomy', 'Unified Twitter Taxonomy']	['Types of sports, like soccer and basketball', 'Brands and Companies', 'A taxonomy of user interests. ', 'A taxonomy of user interests. ']	['Soccer', 'Celebs Arabic', 'Soccer', 'Sports']	['', '', '', 'Sports']	TRUE	[]	2020-03-26 20:02:30	TRUE	لاعب كرة القدم عبدالحق نوري يستيقظ من غيبوبة دامت 3 سنوات. https://t.co/sTbXLknGRV	everyone	0	2016-08-14 23:08:34	منصة ترفيهية لأخبار وتحديثات مشاهير العالم. للتواصل والإعلانات التجارية ✉️: https://t.co/mHNFlCq8Gq	['https://wa.me/message/KEWPHMYJ7ELXC1']	[]	[]	Middle East	FALSE	1520788	140	36759	1066	1130	FALSE	412	لاعب كرة القدم عبدالحق نوري يستيقظ من غيبوبة دامت 3 سنوات.	59	{}	{}	0	0	[]	0
1627697108802326528	FALSE	49	189	1006	342	53	1278747	764961945560678400	ar	[]	[]	[]	[]	['https://twitter.com/CelebsArabic/status/1627697108802326528/photo/1']	[]	[]	['Brand']	['Brands and Companies']	['Celebs Arabic']	['']	TRUE	[]	2023-02-20 15:50:06	TRUE	بداية عد تنازلي مجهول في القنوات الروسية. https://t.co/qZ4kHKEXPK	everyone	1	2016-08-14 23:08:34	منصة ترفيهية لأخبار وتحديثات مشاهير العالم. للتواصل والإعلانات التجارية ✉️: https://t.co/mHNFlCq8Gq	['https://wa.me/message/KEWPHMYJ7ELXC1']	[]	[]	Middle East	FALSE	1520788	140	36759	1066	1130	FALSE	464	بداية عد تنازلي مجهول في القنوات الروسية.	42	{}	{}	0	0	[]	0
1623043465507442705	FALSE	114	421	1475	837	67	1668871	764961945560678400	ar	['تويتر']	['Product']	[]	[]	['https://twitter.com/CelebsArabic/status/1623043465507442705/photo/1']	[]	[]	['Brand', 'Entities [Entity Service]', 'Brand']	['Brands and Companies', 'Entity Service top level domain, every item that is in Entity Service should be in this domain', 'Brands and Companies']	['Celebs Arabic', 'Services', 'X']	['', '', '']	TRUE	[]	2023-02-07 19:38:11	TRUE	عاجل ورسميًا: زيادة عدد الأحرف المسموحة في التغريدة في تويتر الى 26,000 حرف (26 الف). https://t.co/jgZ7z6u6lm	everyone	1	2016-08-14 23:08:34	منصة ترفيهية لأخبار وتحديثات مشاهير العالم. للتواصل والإعلانات التجارية ✉️: https://t.co/mHNFlCq8Gq	['https://wa.me/message/KEWPHMYJ7ELXC1']	[]	[]	Middle East	FALSE	1520788	140	36759	1066	1130	FALSE	494	عاجل ورسميًا: زيادة عدد الأحرف المسموحة في التغريدة في تويتر الى 26000 حرف 26 الف.	84	{}	{}	0	1	[]	0
1689745147179749376	FALSE	66	99	222	22	14	94564	605559486	ar	['السعودية', 'المملكة العربية السعودية']	['Place', 'Place']	[]	[]	['https://twitter.com/i/web/status/1689745147179749376', 'https://twitter.com/abbas22naessr/status/1689745147179749376/video/1']	[]	[]	[]	[]	[]	[]	TRUE	[]	2023-08-10 21:06:51	TRUE	تنظيم القاعده المدعوم من السعودية ينشر فيديو لعمليه اغتيال عبداللطيف السيد ١-طبعاً تم تصوير عمليه الاستهداف من مواقع تمركز تشرف عليها دول التحالف!! ٢- عبداللطيف السيد كان رايح يستلم مبلغ من التحالف بقياده المملكة العربية السعودية ك موكافئه له و لجنوده الذي القو القبض على القعقاع… https://t.co/CNx1ZDgqUt https://t.co/LiLbmtsTK1	everyone	1	2012-06-11 14:48:35	عربي و احب وطني	['https://wa.me/message/KEWPHMYJ7ELXC1']	[]	[]		FALSE	2595	776	2715	2	1148	FALSE	69	تنظيم القاعده المدعوم من السعودية ينشر فيديو لعمليه اغتيال عبداللطيف السيد ١طبعاً تم تصوير عمليه الاستهداف من مواقع تمركز تشرف عليها دول التحالف ٢ عبداللطيف السيد كان رايح يستلم مبلغ من التحالف بقياده المملكة العربية السعودية ك موكافئه له و لجنوده الذي القو القبض على القعقاع	278	{}	{}	0	2	[]	0
1690062419819638784	FALSE	49	238	600	13	8	75122	342732351	ar	[]	[]	[]	[]	['https://twitter.com/BenBenbella/status/1690062419819638784/photo/1']	[]	[]	[]	[]	[]	[]	TRUE	[]	2023-08-11 18:07:35	TRUE	بسم الله والله أكبر، يبدو أن المعركة بدأت قبل قليل مع الروس والمالين في بير/أزواد، دعواتكم! https://t.co/LXXs9x9F5K	everyone	1	2011-07-26 14:04:15	باحث في التاريخ والحضارة ومتخصص في شؤون منطقة الساحل والصحراء، ومهتم بحق الشعب الأزوادي في الحرية وتقرير المصير ، أزواد موطني وقضيتي الأولى.	[]	[]	[]	كيدال / أزواد	FALSE	16523	5650	16039	25	98773	FALSE	70	بسم الله والله أكبر، يبدو أن المعركة بدأت قبل قليل مع الروس والمالين في بيرأزواد، دعواتكم	90	{}	{}	0	0	[]	0
1689310332622118912	FALSE	22	7	66	3	4	10869	1290484129654403072	ar	['الزمالك']	['Organization']	['شيكابالا', 'مرتضى_منصور']	[]	['https://twitter.com/mahmoudanwar74/status/1689310332622118912/video/1']	[]	[]	['Person', 'Business Taxonomy', 'Athlete', 'Unified Twitter Taxonomy', 'Unified Twitter Taxonomy', 'Unified Twitter Taxonomy']	['Named people in the world like Nelson Mandela', 'Categories within Brand Verticals that narrow down the scope of Brands', 'An athlete in the world, like Serena Williams or Lionel Messi', 'A taxonomy of user interests. ', 'A taxonomy of user interests. ', 'A taxonomy of user interests. ']	['Shikabala ', 'Sports & Fitness Business', 'Shikabala ', 'Soccer', 'Shikabala ', 'Sports']	['', 'Brands, companies, advertisers and every non-person handle with the profit intent related to sports nutrition, athletic apparel, sports apps, fitness venues', '', '', '', 'Sports']	TRUE	[]	2023-08-09 16:19:03	TRUE	نفس الأمر من قبل #شيكابالا يعتذر ل #مرتضى_منصور عن البيان والكل بيضحك على عقول جمهور الزمالك واولهم شيكابالا نفسه 👇 https://t.co/tIMEz5cOY6	everyone	1	2020-08-04 03:06:44	كاتب رياضى .. و يوتيوبر اهلاوى .. الأهلى بعد الدين🕋 و الوطن 🇪🇬 كالماء والهواء 🦅❤️👌 الصفحة الرسمية	[]	[]	[]	cairo , Egypt	FALSE	47336	204	15116	28	25232	FALSE	71	نفس الأمر من قبل شيكابالا يعتذر ل مرتضى منصور عن البيان والكل بيضحك على عقول جمهور الزمالك واولهم شيكابالا نفسه	114	{'👇': 'backhand index pointing down'}	{'👇': 1}	1	1	['الزمالك']	1
1690166123843448832	FALSE	22	34	276	3	3	15360	1556259449769165056	ar	[]	[]	[]	[]	['https://twitter.com/MAGDIOQBAH1459/status/1690166123843448832/photo/1']	[]	[]	['Business Taxonomy', 'Business Taxonomy', 'Person', 'Interests and Hobbies Vertical', 'Interests and Hobbies Category', 'Unified Twitter Taxonomy', 'Unified Twitter Taxonomy', 'Unified Twitter Taxonomy']	['Categories within Brand Verticals that narrow down the scope of Brands', 'Categories within Brand Verticals that narrow down the scope of Brands', 'Named people in the world like Nelson Mandela', 'Top level interests and hobbies groupings, like Food or Travel', 'A grouping of interests and hobbies entities, like Novelty Food or Destinations', 'A taxonomy of user interests. ', 'A taxonomy of use…	['Financial Services Business', 'Technology Business', 'Elon Musk', 'Business & finance', 'Leadership', 'Elon Musk', 'Tech personalities', 'Business personalities']	['Brands, companies, advertisers and every non-person handle with the profit intent related to Banks, Credit cards, Insurance, Investments, Stocks ', 'Brands, companies, advertisers and every non-person handle with the profit intent related to softwares, apps, communication equipments, hardwares', 'Elon Musk', '', 'Leadership', 'Elon Musk', 'Tech Professionals', '']	TRUE	[]	2023-08-12 00:59:40	TRUE	ايلون ماسك فرع ذمار https://t.co/O8FIMjba8w	everyone	1	2022-08-07 12:42:48	قف على ناصية الحلم وقاتل.. كاتب وناشط حقوقي	[]	[]	[]		FALSE	66945	4324	26479	24	52476	FALSE	72	ايلون ماسك فرع ذمار	20	{}	{}	0	0	[]	0
1599085937996152832	FALSE	23	8	135	0	1	0	1556259449769165056	ar	['مايكل بالاك', 'المانيا']	['Person', 'Place']	['كأس_العالم_2022_قطر']	[]	['https://twitter.com/MjdyQbt/status/1599085937996152832/photo/1']	[]	[]	[]	[]	[]	[]	TRUE	[]	2022-12-03 16:59:31	TRUE	تصريح للتاريخ : مايكل بالاك أسطورة المانيا كيف نريد الفوز بكأس العالم للرجال ونحن منذ أن بدأت البطوله ندعم قضيه لا تمت للرجال بِصلة ❤️ #كأس_العالم_2022_قطر https://t.co/1evlgjWr2m	everyone	1	2022-08-07 12:42:48	قف على ناصية الحلم وقاتل.. كاتب وناشط حقوقي	[]	[]	[]		FALSE	66945	4324	26479	24	52476	FALSE	615	تصريح للتاريخ : مايكل بالاك أسطورة المانيا كيف نريد الفوز بكأس العالم للرجال ونحن منذ أن بدأت البطوله ندعم قضيه لا تمت للرجال بِصلة كأس العالم 2022 قطر	154	{'❤️': 'red heart'}	{'❤️': 1}	1	2	[]	0
1689594436148228096	FALSE	100	65	690	8	14	50825	3309435096	ar	[]	[]	['الخرطوم_مقبره_الجنحويد']	[]	['https://twitter.com/salma1siddig/status/1689594436148228096/video/1']	[]	[]	[]	[]	[]	[]	TRUE	[]	2023-08-10 11:07:59	TRUE	بدأت عمليات تحريك المُشاة في عرض عسكري مهيب اتجاه وادي سيدنا 🔥 #الخرطوم_مقبره_الجنحويد https://t.co/aakr3lNhh3	everyone	1	2015-08-08 08:41:47	احلم بسودان افضل❤️🇸🇩 | اقف على حافة الحلم اقاتل من اجل هدفي | ناشطة و مدونة | تغريداتي على المفضلة	[]	[]	[]	Toronto, Ontario	FALSE	400474	10404	45768	198	6243	FALSE	73	بدأت عمليات تحريك المُشاة في عرض عسكري مهيب اتجاه وادي سيدنا الخرطوم مقبره الجنحويد	85	{'🔥': 'fire'}	{'🔥': 1}	1	0	[]	0
1697879484085506138	FALSE	21	8	427	0	0	25544	3309435096	ar	[]	[]	[]	[]	[]	[]	[]	[]	[]	[]	[]	TRUE	[]	2023-09-02 07:49:48	TRUE	تم تدعيم ارتكازات الجيش في مناطق بحري والخرطوم وأمدرمان	everyone	1	2015-08-08 08:41:47	احلم بسودان افضل❤️🇸🇩 | اقف على حافة الحلم اقاتل من اجل هدفي | ناشطة و مدونة | تغريداتي على المفضلة	[]	[]	[]	Toronto, Ontario	FALSE	400474	10404	45768	198	6243	FALSE	6	تم تدعيم ارتكازات الجيش في مناطق بحري والخرطوم وأمدرمان	55	{}	{}	0	0	[]	0
1282930516031832064	FALSE	52	20	75	4	0	0	3309435096	ar	[]	[]	['اوقفوا_القتل_في_دارفور', 'فتابرنو_تنزف']	[]	['https://twitter.com/salma1siddig/status/1282930516031832064/photo/1', 'https://twitter.com/salma1siddig/status/1282930516031832064/photo/1', 'https://twitter.com/salma1siddig/status/1282930516031832064/photo/1']	[]	[]	[]	[]	[]	[]	TRUE	[]	2020-07-14 06:50:45	TRUE	لم يتغير الحال ماقبل الثورة ومابعدها لا تزال الدماء تنزف في دارفور والمواطنين العزل يقتلون ويشردون، لاتزال الانتهاكات هي الانتهاكات الدماء في كل مكان والخوف والفزع يخيم على اهل فتابرنو والحكومة بشقيها المدني والعسكري عاجزة عن حماية المدنيين! #اوقفوا_القتل_في_دارفور #فتابرنو_تنزف https://t.co/CkzSTsn4Is	everyone	0	2015-08-08 08:41:47	احلم بسودان افضل❤️🇸🇩 | اقف على حافة الحلم اقاتل من اجل هدفي | ناشطة و مدونة | تغريداتي على المفضلة	[]	[]	[]	Toronto, Ontario	FALSE	400474	10404	45768	198	6243	FALSE	121	لم يتغير الحال ماقبل الثورة ومابعدها لا تزال الدماء تنزف في دارفور والمواطنين العزل يقتلون ويشردون، لاتزال الانتهاكات هي الانتهاكات الدماء في كل مكان والخوف والفزع يخيم على اهل فتابرنو والحكومة بشقيها المدني والعسكري عاجزة عن حماية المدنيين اوقفوا القتل في دارفور فتابرنو تنزف	278	{}	{}	0	0	[]	0
1648067777104674816	FALSE	151	179	515	31	36	109374	3309435096	ar	[]	[]	[]	[]	['https://twitter.com/salma1siddig/status/1648067777104674816/video/1']	[]	[]	[]	[]	[]	[]	TRUE	[]	2023-04-17 20:55:52	TRUE	منزل حميدتي قبل قليل https://t.co/2kvGf5I69X	everyone	1	2015-08-08 08:41:47	احلم بسودان افضل❤️🇸🇩 | اقف على حافة الحلم اقاتل من اجل هدفي | ناشطة و مدونة | تغريداتي على المفضلة	[]	[]	[]	Toronto, Ontario	FALSE	400474	10404	45768	198	6243	FALSE	361	منزل حميدتي قبل قليل	21	{}	{}	0	0	[]	0
1689514016039657477	FALSE	56	22	297	3	6	100949	1538882255367593984	ar	['محمد بازوم']	['Person']	[]	[]	['https://twitter.com/i/web/status/1689514016039657477', 'https://twitter.com/mog_china/status/1689514016039657477/video/1']	[]	[]	['Interests and Hobbies Category']	['A grouping of interests and hobbies entities, like Novelty Food or Destinations']	['Design']	['Design']	TRUE	[]	2023-08-10 05:48:25	TRUE	🔴 ظهر أول فيديو للرئيس المخلوع محمد بازوم. محاطاً بالجيش، يتجول في أراضي القصر الرئاسي.. انتبه للهاتف في يدك. بادئ ذي بدء، تم تصميم هذه اللقطات للأمريكيين ، الذين كانت حياة وصحة الرئيس السابق وعائلته أحد المتطلبات خلال المفاوضات السابقة مع فيكتوريا نولاند يمكننا أن نفترض… https://t.co/fxbPDjlroA https://t.co/MrU0PHrfQG	everyone	1	2022-06-20 13:51:57	China news and the international struggle over the central region (Eurasia) 中国新闻与中部地区（欧亚大陆）的国际斗争	[]	[]	[]	Shanghai	FALSE	413131	27	16394	389	2259	FALSE	74	ظهر أول فيديو للرئيس المخلوع محمد بازوم. محاطاً بالجيش، يتجول في أراضي القصر الرئاسي.. انتبه للهاتف في يدك. بادئ ذي بدء، تم تصميم هذه اللقطات للأمريكيين ، الذين كانت حياة وصحة الرئيس السابق وعائلته أحد المتطلبات خلال المفاوضات السابقة مع فيكتوريا نولاند يمكننا أن نفترض	279	{'🔴': 'red circle'}	{'🔴': 1}	1	1	[]	0
1667923106059395072	FALSE	462	359	1954	160	195	2016685	1538882255367593984	ar	['الكويت']	['Place']	[]	[]	['https://twitter.com/mog_china/status/1667923106059395072/video/1']	[]	[]	[]	[]	[]	[]	TRUE	[]	2023-06-11 15:53:51	TRUE	خمسون مليون إطار يحترق في الكويت منذ أكثر من أسبوع. يمكن رؤية الحريق العملاق حتى من الفضاء. ستكون له تداعيات بيئية كارثية على المنطقة والعالم. https://t.co/gJIe2eod91	everyone	1	2022-06-20 13:51:57	China news and the international struggle over the central region (Eurasia) 中国新闻与中部地区（欧亚大陆）的国际斗争	[]	[]	[]	Shanghai	FALSE	413131	27	16394	389	2259	FALSE	213	خمسون مليون إطار يحترق في الكويت منذ أكثر من أسبوع. يمكن رؤية الحريق العملاق حتى من الفضاء. ستكون له تداعيات بيئية كارثية على المنطقة والعالم.	145	{}	{}	0	1	[]	0
1697683533219705060	FALSE	74	4	622	4	3	32516	1538882255367593984	ar	[]	[]	[]	[]	['https://twitter.com/mog_china/status/1697683533219705060/video/1']	[]	[]	[]	[]	[]	[]	TRUE	[]	2023-09-01 18:51:10	TRUE	🔴 أجبرت الظروف القاسية في هونغ كونغ السلطات على إصدار أعلى مستوى من الإنذار بسبب إعصار ساولا. https://t.co/TVW9Ve6oXT	everyone	1	2022-06-20 13:51:57	China news and the international struggle over the central region (Eurasia) 中国新闻与中部地区（欧亚大陆）的国际斗争	[]	[]	[]	Shanghai	FALSE	413131	27	16394	389	2259	FALSE	9	أجبرت الظروف القاسية في هونغ كونغ السلطات على إصدار أعلى مستوى من الإنذار بسبب إعصار ساولا.	93	{'🔴': 'red circle'}	{'🔴': 1}	1	0	[]	0
1681279114362142721	FALSE	2	1	30	0	0	3038	1538882255367593984	ar	['الصين']	['Place']	[]	[]	[]	[]	[]	[]	[]	[]	[]	TRUE	[]	2023-07-18 12:25:52	TRUE	⚡️ نشرت الصين قوة إنقاذ تضم 11 سفينة و 5 طائرات هليكوبتر و 46 قارب إنقاذ و 8 فرق إنقاذ مع اقتراب إعصار تليم. ومن المتوقع أن يضرب إعصار تاليم ، الرابع هذا العام ، المناطق الساحلية بين تايشان في قوانغدونغ ووينشان في هاينان.	everyone	0	2022-06-20 13:51:57	China news and the international struggle over the central region (Eurasia) 中国新闻与中部地区（欧亚大陆）的国际斗争	[]	[]	[]	Shanghai	FALSE	413131	27	16394	389	2259	FALSE	123	نشرت الصين قوة إنقاذ تضم 11 سفينة و 5 طائرات هليكوبتر و 46 قارب إنقاذ و 8 فرق إنقاذ مع اقتراب إعصار تليم. ومن المتوقع أن يضرب إعصار تاليم ، الرابع هذا العام ، المناطق الساحلية بين تايشان في قوانغدونغ ووينشان في هاينان.	222	{'⚡': 'high voltage'}	{'⚡': 1}	1	1	[]	0
1649810794798895106	FALSE	467	91	2047	35	29	237428	1538882255367593984	ar	[]	[]	[]	[]	['https://twitter.com/mog_china/status/1649810794798895106/video/1']	[]	[]	[]	[]	[]	[]	TRUE	[]	2023-04-22 16:22:00	TRUE	تواصل الشرطة الفرنسية تدريب السكان على أساسيات الديمقراطية https://t.co/PM6hz2bcTL	everyone	1	2022-06-20 13:51:57	China news and the international struggle over the central region (Eurasia) 中国新闻与中部地区（欧亚大陆）的国际斗争	[]	[]	[]	Shanghai	FALSE	413131	27	16394	389	2259	FALSE	351	تواصل الشرطة الفرنسية تدريب السكان على أساسيات الديمقراطية	59	{}	{}	0	0	[]	0
1628673922358030336	FALSE	8	5	46	0	0	5358	1538882255367593984	ar	[]	[]	[]	[]	['https://twitter.com/mog_china/status/1628673922358030336/video/1', 'https://twitter.com/mog_china/status/1628642193907785728']	[]	[]	[]	[]	[]	[]	TRUE	[]	2023-02-23 08:31:37	TRUE	كاميرات المراقبة في مطار طاجيكستان تظهر لحظة وقوع الزلزال بقوة 7.3 الذي ضرب المنطقة الحدودية بين شينجيانغ وطاجيكستان صباح اليوم. https://t.co/RCQ6A1wV7o https://t.co/Xapwb2Rzts	everyone	1	2022-06-20 13:51:57	China news and the international struggle over the central region (Eurasia) 中国新闻与中部地区（欧亚大陆）的国际斗争	[]	[]	[]	Shanghai	FALSE	413131	27	16394	389	2259	FALSE	460	كاميرات المراقبة في مطار طاجيكستان تظهر لحظة وقوع الزلزال بقوة 7.3 الذي ضرب المنطقة الحدودية بين شينجيانغ وطاجيكستان صباح اليوم.	130	{}	{}	0	0	[]	0
1689595874836373505	FALSE	6	3	56	0	1	3213	1397293447791403008	ar	['الشباب', 'الهلال', 'الاهلي', 'محمد صلاح']	['Organization', 'Organization', 'Organization', 'Person']	[]	[]	['https://twitter.com/Madehaosman3/status/1689595874836373505/photo/1']	[]	[]	['Person', 'Business Taxonomy', 'Athlete', 'Unified Twitter Taxonomy', 'Unified Twitter Taxonomy', 'Unified Twitter Taxonomy', 'Person', 'Athlete', 'Unified Twitter Taxonomy', 'Unified Twitter Taxonomy', 'Unified Twitter Taxonomy']	['Named people in the world like Nelson Mandela', 'Categories within Brand Verticals that narrow down the scope of Brands', 'An athlete in the world, like Serena Williams or Lionel Messi', 'A taxonomy of user interests. ', 'A taxonomy of user interests. ', 'A taxonomy of user interests. ', 'Named people in the world like Nelson Mandela', 'An athlete in the world, like Serena Williams or Lionel Me…	['Sadio Mane', 'Sports & Fitness Business', 'Sadio Mane', 'Soccer', 'Sadio Mane', 'Sports', 'Mohamed Salah', 'Mohamed Salah', 'Soccer', 'Mohamed Salah', 'Sports']	['', 'Brands, companies, advertisers and every non-person handle with the profit intent related to sports nutrition, athletic apparel, sports apps, fitness venues', '', '', '', 'Sports', '', '', '', '', 'Sports']	TRUE	[]	2023-08-10 11:13:42	TRUE	في البطوله العربيه المراسل لساديو ماني: تتمنى مواجهه الشباب ام الهلال في النهائي ؟ ساديو ماني: لا أعرف الفريقين لا اعرف غير الاهلي المصري عن طريق محمد صلاح. https://t.co/3MvK8SACqk	following	1	2021-05-25 20:50:23	الاهلي عشق الطفوله ممنوع الخاص	[]	[]	[]		FALSE	1291	664	79637	3	76398	FALSE	75	في البطوله العربيه المراسل لساديو ماني: تتمنى مواجهه الشباب ام الهلال في النهائي ؟ ساديو ماني: لا أعرف الفريقين لا اعرف غير الاهلي المصري عن طريق محمد صلاح.	157	{}	{}	0	4	['الشباب', 'الهلال', 'الاهلي']	3
1688999393783943168	FALSE	11	14	18	2	0	19116	783447877	ar	['منظمة الصحة العالمية', 'بريطانيا والولايات المتحدة الأمريكية']	['Organization', 'Place']	[]	[]	['https://twitter.com/Eastern_RT/status/1688999393783943168/photo/1']	[]	[]	['Ongoing News Story', 'Unified Twitter Taxonomy']	["Ongoing News Stories like 'Brexit'", 'A taxonomy of user interests. ']	['COVID-19', 'COVID-19']	['', '']	TRUE	[]	2023-08-08 19:43:30	TRUE	منظمة الصحة العالمية: نراقب باهتمام متحورا جديدا اطلق عليه اسم (x) لفيروس كورونا منذ 3 أسابيع بعد ارتفاع الإصابات في بريطانيا والولايات المتحدة الأمريكية. https://t.co/z3cYnpkK0L	everyone	1	2012-08-27 00:11:15	أخبار عاجلة وحصرية #الشرقية .. فعِّل التنبيهات لتصلك آخر الأخبار .. للتواصل واتس آب https://t.co/zioXbjXNT2 ترخيص إعلاني : 337511	['https://is.gd/t033DQ']	['الشرقية']	[]	الخبر ، الدمام	FALSE	788693	632159	78639	255	939	FALSE	76	منظمة الصحة العالمية: نراقب باهتمام متحورا جديدا اطلق عليه اسم لفيروس كورونا منذ 3 أسابيع بعد ارتفاع الإصابات في بريطانيا والولايات المتحدة الأمريكية.	152	{}	{}	0	2	['منظمة الصحة العالمية']	1
1644879577288790016	FALSE	18	4	19	0	0	15251	783447877	ar	['السعودية']	['Place']	[]	[]	['https://twitter.com/Eastern_RT/status/1644879577288790016/photo/1', 'https://twitter.com/Eastern_RT/status/1644879577288790016/photo/1', 'https://twitter.com/Eastern_RT/status/1644879577288790016/photo/1']	[]	[]	[]	[]	[]	[]	TRUE	[]	2023-04-09 01:47:06	TRUE	وسائل اعلام ايرانية: ازالة اللوحات التي تحمل اسم نمر النمر من الشوارع التي تقع امام القنصلية السعودية https://t.co/YB0Ru0dz7W	everyone	1	2012-08-27 00:11:15	أخبار عاجلة وحصرية #الشرقية .. فعِّل التنبيهات لتصلك آخر الأخبار .. للتواصل واتس آب https://t.co/zioXbjXNT2 ترخيص إعلاني : 337511	['https://is.gd/t033DQ']	['الشرقية']	[]	الخبر ، الدمام	FALSE	788693	632159	78639	255	939	FALSE	377	وسائل اعلام ايرانية: ازالة اللوحات التي تحمل اسم نمر النمر من الشوارع التي تقع امام القنصلية السعودية	102	{}	{}	0	1	[]	0
1143538259454242816	FALSE	31	6	24	1	0	0	783447877	ar	['أبو أسامة المهاجر']	['Person']	['صور', 'السعودية', 'داعش', 'اليمن']	[]	['https://twitter.com/Eastern_RT/status/1143538259454242816/photo/1', 'https://twitter.com/Eastern_RT/status/1143538259454242816/photo/1', 'https://twitter.com/Eastern_RT/status/1143538259454242816/photo/1']	[]	[]	[]	[]	[]	[]	TRUE	[]	2019-06-25 15:15:41	TRUE	#صور القوات الخاصة #السعودية تلقي القبض على أمير تنظيم #داعش الإرهابي بـ #اليمن الملقب بـ (أبو أسامة المهاجر) والمسؤول المالي للتنظيم وعدد من أعضاء التنظيم المرافقين له. https://t.co/rYDiI0N3nO	everyone	0	2012-08-27 00:11:15	أخبار عاجلة وحصرية #الشرقية .. فعِّل التنبيهات لتصلك آخر الأخبار .. للتواصل واتس آب https://t.co/zioXbjXNT2 ترخيص إعلاني : 337511	['https://is.gd/t033DQ']	['الشرقية']	[]	الخبر ، الدمام	FALSE	788693	632159	78639	255	939	FALSE	812	صور القوات الخاصة السعودية تلقي القبض على أمير تنظيم داعش الإرهابي بـ اليمن الملقب بـ أبو أسامة المهاجر والمسؤول المالي للتنظيم وعدد من أعضاء التنظيم المرافقين له.	165	{}	{}	0	1	[]	0
1689023416681037824	TRUE	89	132	640	12	9	93457	1230774184118234880	ar	[]	[]	[]	[]	['https://twitter.com/ALMOTAZBELLAH10/status/1689023416681037824/photo/1']	[]	[]	[]	[]	[]	[]	TRUE	[]	2023-08-08 21:18:57	TRUE	ما قام به الجيش اليوم في امدرمان يجب ان يُكتب في صفحات العظمة والفخر.. اليوم يحق لهذا الشعب ان يفخر بأبناء جيشه ويباهي بهم.. اليوم ملحمة تاريخية يسطر تفاصيلها أبطال الجيش السوداني.. ما جرى يجب أن يُدرس للأجيال.. اللهم نصرك وعزك للسودان وشعبه وجيشه وادحر المتمردين والخونة والعملاء https://t.co/84xrDog6ES	everyone	1	2020-02-21 08:40:30	اكاديمي.. اعلامي.. ناشط.. محب حتى الثمالة لوطنه.. لأعداه بسوّي النِكاية.. وإن هُزمت بلملم قوايَ.. غير سلامتك ما عندي غاية.. ان شاء الله تسلم وطني العزيز..	['https://is.gd/t033DQ']	['الشرقية']	[]	Sudan	FALSE	7417	999	12703	13	6432	FALSE	77	ما قام به الجيش اليوم في امدرمان يجب ان يُكتب في صفحات العظمة والفخر.. اليوم يحق لهذا الشعب ان يفخر بأبناء جيشه ويباهي بهم.. اليوم ملحمة تاريخية يسطر تفاصيلها أبطال الجيش السوداني.. ما جرى يجب أن يُدرس للأجيال.. اللهم نصرك وعزك للسودان وشعبه وجيشه وادحر المتمردين والخونة والعملاء	281	{}	{}	0	0	[]	0
1687748910054256642	FALSE	2	7	44	2	1	29043	245956466	ar	[]	[]	['الخرطوم', 'الحدث']	[]	['https://twitter.com/AlHadath/status/1687748910054256642/video/1']	[]	[]	['Brand Vertical', 'Entities [Entity Service]', 'Brand', 'News Vertical', 'Unified Twitter Taxonomy']	['Top level entities that describe a Brands industry', 'Entity Service top level domain, every item that is in Entity Service should be in this domain', 'Brands and Companies', 'News Categories like Entertainment or Technology', 'A taxonomy of user interests. ']	['Entertainment', 'TV/Movies Related - Entertainment', 'AlHadath (الحدث)', 'World news', 'World news']	['', '', '', 'General Worldwide News', 'General Worldwide News']	TRUE	[]	2023-08-05 08:54:31	TRUE	#الخرطوم - للمرة الأولى منذ اندلاع الحرب.. الجيش السوداني يصل إلى محيط القيادة العامة والمطار #الحدث https://t.co/4jltC7Pm9C	everyone	1	2011-02-01 20:40:40	#الحدث .. قناة تفاعلية تركز على الأحداث السياسية في المنطقة العربية	[]	['الحدث']	[]	Riyadh	FALSE	12128057	50	479403	7836	0	TRUE	78	الخرطوم للمرة الأولى منذ اندلاع الحرب.. الجيش السوداني يصل إلى محيط القيادة العامة والمطار الحدث	98	{}	{}	0	0	[]	0
1447400311245586433	FALSE	9	5	62	0	1	0	245956466	ar	['فوهته']	['Place']	['الحدث']	[]	['https://twitter.com/AlHadath/status/1447400311245586433/video/1']	[]	[]	['Events [Entity Service]']	['Real world events. ']	['United Nations Day 2021']	['']	TRUE	[]	2021-10-11 03:15:00	TRUE	بعد انهيار جزئي في فوهته.. بركان "لا بالما" يواصل قذف الحمم الملتهبة #الحدث https://t.co/m0FeqFTWX7	everyone	0	2011-02-01 20:40:40	#الحدث .. قناة تفاعلية تركز على الأحداث السياسية في المنطقة العربية	[]	['الحدث']	[]	Riyadh	FALSE	12128057	50	479403	7836	0	TRUE	137	بعد انهيار جزئي في فوهته.. بركان لا بالما يواصل قذف الحمم الملتهبة الحدث	73	{}	{}	0	1	[]	0
1671397639848443906	FALSE	1	2	10	0	0	11204	245956466	ar	[]	[]	['صفاقس', 'تونس', 'الحدث']	[]	['https://twitter.com/AlHadath/status/1671397639848443906/photo/1']	[]	[]	['Place', 'Brand Vertical', 'Entities [Entity Service]', 'Brand', 'News Vertical', 'Unified Twitter Taxonomy']	['Named places in the world, like Fenway Park', 'Top level entities that describe a Brands industry', 'Entity Service top level domain, every item that is in Entity Service should be in this domain', 'Brands and Companies', 'News Categories like Entertainment or Technology', 'A taxonomy of user interests. ']	['Tunisia (تونس)', 'Entertainment', 'TV/Movies Related - Entertainment', 'AlHadath (الحدث)', 'World news', 'World news']	['', '', '', '', 'General Worldwide News', 'General Worldwide News']	TRUE	[]	2023-06-21 06:00:25	TRUE	الإذاعة التونسية: قتيلان و30 مصاباً في حادث انقلاب قطار بين #صفاقس و #تونس العاصمة #الحدث https://t.co/kKtxnMUqrH	everyone	1	2011-02-01 20:40:40	#الحدث .. قناة تفاعلية تركز على الأحداث السياسية في المنطقة العربية	[]	['الحدث']	[]	Riyadh	FALSE	12128057	50	479403	7836	0	TRUE	192	الإذاعة التونسية: قتيلان و30 مصاباً في حادث انقلاب قطار بين صفاقس و تونس العاصمة الحدث	87	{}	{}	0	0	[]	0
1698365234983862631	FALSE	2	3	22	0	1	12950	245956466	ar	[]	[]	['هايكوي', 'الصين', 'هونغ_كونغ', 'الحدث']	[]	['https://twitter.com/AlHadath/status/1698365234983862631/video/1']	[]	[]	['Brand Vertical', 'Entities [Entity Service]', 'Business Taxonomy', 'Business Taxonomy', 'Brand', 'Entities [Entity Service]', 'Interests and Hobbies', 'News Vertical', 'Unified Twitter Taxonomy']	['Top level entities that describe a Brands industry', 'Entity Service top level domain, every item that is in Entity Service should be in this domain', 'Categories within Brand Verticals that narrow down the scope of Brands', 'Categories within Brand Verticals that narrow down the scope of Brands', 'Brands and Companies', 'Entity Service top level domain, every item that is in Entity Service sho…	['Entertainment', 'TV/Movies Related - Entertainment', 'Gaming Business', 'Travel & Transportation Business', 'AlHadath (الحدث)', 'Travel', 'Travel Actions', 'World news', 'World news']	['', '', 'Brands, companies, advertisers and every non-person handle with the profit intent related to offline and online games such as gaming consoles, tabletop games, video game publishers', 'Brands, companies, advertisers and every non-person handle with the profit intent related to travel as airlines, travel agencies, hotels', '', 'Travel', 'This entity includes all conversations about travel…	TRUE	[]	2023-09-03 16:00:00	TRUE	إجلاء الآلاف وإلغاء الرحلات.. تايوان تتأهب لإعصار " #هايكوي" بعد يوم من إعصار "ساولا" العنيف الذي ضرب #الصين و #هونغ_كونغ #الحدث https://t.co/VEWwSc4Q4M	everyone	1	2011-02-01 20:40:40	#الحدث .. قناة تفاعلية تركز على الأحداث السياسية في المنطقة العربية	[]	['الحدث']	[]	Riyadh	FALSE	12128057	50	479403	7836	0	TRUE	9	إجلاء الآلاف وإلغاء الرحلات.. تايوان تتأهب لإعصار هايكوي بعد يوم من إعصار ساولا العنيف الذي ضرب الصين و هونغ كونغ الحدث	121	{}	{}	0	0	[]	0
1689633284316176384	FALSE	3	2	25	1	1	13046	245956466	ar	['الجيش السوداني']	['Organization']	['الحدث']	[]	['https://twitter.com/AlHadath/status/1689633284316176384/video/1']	[]	[]	['Brand Vertical', 'Entities [Entity Service]', 'Brand', 'News Vertical', 'Unified Twitter Taxonomy']	['Top level entities that describe a Brands industry', 'Entity Service top level domain, every item that is in Entity Service should be in this domain', 'Brands and Companies', 'News Categories like Entertainment or Technology', 'A taxonomy of user interests. ']	['Entertainment', 'TV/Movies Related - Entertainment', 'AlHadath (الحدث)', 'World news', 'World news']	['', '', '', 'General Worldwide News', 'General Worldwide News']	TRUE	[]	2023-08-10 13:42:21	TRUE	شاهد .. الجيش السوداني يرسل تعزيزات نحو قاعدة وادي سيدنا الجوية #الحدث https://t.co/OUGY550HSi	everyone	1	2011-02-01 20:40:40	#الحدث .. قناة تفاعلية تركز على الأحداث السياسية في المنطقة العربية	[]	['الحدث']	[]	Riyadh	FALSE	12128057	50	479403	7836	0	TRUE	73	شاهد .. الجيش السوداني يرسل تعزيزات نحو قاعدة وادي سيدنا الجوية الحدث	70	{}	{}	0	1	['الجيش السوداني']	1
1690679696852197376	FALSE	23	12	124	2	1	57658	245956466	ar	[]	[]	['الصحة_العالمية', 'كورونا', 'الحدث']	[]	['https://twitter.com/AlHadath/status/1690679696852197376/video/1']	[]	[]	['Brand Vertical', 'Entities [Entity Service]', 'Brand', 'Ongoing News Story', 'Unified Twitter Taxonomy', 'News Vertical', 'Unified Twitter Taxonomy']	['Top level entities that describe a Brands industry', 'Entity Service top level domain, every item that is in Entity Service should be in this domain', 'Brands and Companies', "Ongoing News Stories like 'Brexit'", 'A taxonomy of user interests. ', 'News Categories like Entertainment or Technology', 'A taxonomy of user interests. ']	['Entertainment', 'TV/Movies Related - Entertainment', 'AlHadath (الحدث)', 'COVID-19', 'COVID-19', 'World news', 'World news']	['', '', '', '', '', 'General Worldwide News', 'General Worldwide News']	TRUE	[]	2023-08-13 11:00:25	TRUE	ظهر في 51 دولة وأقلق منظمة #الصحة_العالمية.. هذا ما نعرفه عن "إيريس" متحور #كورونا الجديد "المثير للاهتمام" #الحدث https://t.co/h39Myf863J	everyone	0	2011-02-01 20:40:40	#الحدث .. قناة تفاعلية تركز على الأحداث السياسية في المنطقة العربية	[]	['الحدث']	[]	Riyadh	FALSE	12128057	50	479403	7836	0	TRUE	76	ظهر في 51 دولة وأقلق منظمة الصحة العالمية.. هذا ما نعرفه عن إيريس متحور كورونا الجديد المثير للاهتمام الحدث	109	{}	{}	0	0	[]	0
1577956889161306112	FALSE	39	61	182	49	12	0	245956466	ar	['إبراهيم تراوري', 'بالمقدم بول هنري سانداوغو']	['Person', 'Person']	['بوركينا_فاسو', 'الحدث']	[]	['https://twitter.com/AlHadath/status/1577956889161306112/video/1']	[]	[]	['Brand Vertical', 'Entities [Entity Service]', 'Brand', 'News Vertical', 'Unified Twitter Taxonomy']	['Top level entities that describe a Brands industry', 'Entity Service top level domain, every item that is in Entity Service should be in this domain', 'Brands and Companies', 'News Categories like Entertainment or Technology', 'A taxonomy of user interests. ']	['Entertainment', 'TV/Movies Related - Entertainment', 'AlHadath (الحدث)', 'World news', 'World news']	['', '', '', 'General Worldwide News', 'General Worldwide News']	TRUE	[]	2022-10-06 09:40:14	TRUE	رسمياً.. تعيين الكابتن إبراهيم تراوري رئيساً لـ #بوركينا_فاسو بعد الانقلاب الثاني في البلاد بأقل من 9 أشهر، وبعدما أطاح بالمقدم بول هنري سانداوغو داميبا الذي تولى السلطة في يناير الماضي #الحدث https://t.co/HgMxPftvtn	everyone	0	2011-02-01 20:40:40	#الحدث .. قناة تفاعلية تركز على الأحداث السياسية في المنطقة العربية	[]	['الحدث']	[]	Riyadh	FALSE	12128057	50	479403	7836	0	TRUE	89	رسمياً.. تعيين الكابتن إبراهيم تراوري رئيساً لـ بوركينا فاسو بعد الانقلاب الثاني في البلاد بأقل من 9 أشهر، وبعدما أطاح بالمقدم بول هنري سانداوغو داميبا الذي تولى السلطة في يناير الماضي الحدث	191	{}	{}	0	2	[]	0
1217188481480392704	FALSE	12	1	89	3	1	0	245956466	ar	['#السودان']	['Place']	['السودان']	[]	[]	[]	[]	['Brand Vertical', 'Entities [Entity Service]', 'Brand']	['Top level entities that describe a Brands industry', 'Entity Service top level domain, every item that is in Entity Service should be in this domain', 'Brands and Companies']	['Entertainment', 'TV/Movies Related - Entertainment', 'AlHadath (الحدث)']	['', '', '']	TRUE	[]	2020-01-14 20:55:22	TRUE	#السودان — مراسل الحدث: إطلاق نار من أسلحة ثقيلة قرب مكان تحصن المتمردين في كافوري	everyone	0	2011-02-01 20:40:40	#الحدث .. قناة تفاعلية تركز على الأحداث السياسية في المنطقة العربية	[]	['الحدث']	[]	Riyadh	FALSE	12128057	50	479403	7836	0	TRUE	99	السودان مراسل الحدث: إطلاق نار من أسلحة ثقيلة قرب مكان تحصن المتمردين في كافوري	81	{}	{}	0	1	[]	0
1683555045600636930	FALSE	4	6	36	1	0	15166	245956466	ar	[]	[]	['الجزائر', 'الحدث']	[]	['https://twitter.com/AlHadath/status/1683555045600636930/video/1']	[]	[]	['Brand Vertical', 'Entities [Entity Service]', 'Brand', 'News Vertical', 'Unified Twitter Taxonomy']	['Top level entities that describe a Brands industry', 'Entity Service top level domain, every item that is in Entity Service should be in this domain', 'Brands and Companies', 'News Categories like Entertainment or Technology', 'A taxonomy of user interests. ']	['Entertainment', 'TV/Movies Related - Entertainment', 'AlHadath (الحدث)', 'World news', 'World news']	['', '', '', 'General Worldwide News', 'General Worldwide News']	TRUE	[]	2023-07-24 19:09:36	TRUE	النيران تلتهم غابات #الجزائر.. والداخلية تُعلن ارتفاع حصيلة ضحايا الحرائق في البلاد إلى 34 قتيلا بينهم 10 من أفراد الجيش #الحدث https://t.co/Q8Bw4MBKih	everyone	0	2011-02-01 20:40:40	#الحدث .. قناة تفاعلية تركز على الأحداث السياسية في المنطقة العربية	[]	['الحدث']	[]	Riyadh	FALSE	12128057	50	479403	7836	0	TRUE	105	النيران تلتهم غابات الجزائر.. والداخلية تُعلن ارتفاع حصيلة ضحايا الحرائق في البلاد إلى 34 قتيلا بينهم 10 من أفراد الجيش الحدث	126	{}	{}	0	0	[]	0
1681389629188997134	FALSE	10	7	158	0	0	22975	245956466	ar	[]	[]	['الصين', 'الحدث']	[]	['https://twitter.com/AlHadath/status/1681389629188997134/video/1']	[]	[]	['Brand Vertical', 'Entities [Entity Service]', 'Brand', 'News Vertical', 'Unified Twitter Taxonomy']	['Top level entities that describe a Brands industry', 'Entity Service top level domain, every item that is in Entity Service should be in this domain', 'Brands and Companies', 'News Categories like Entertainment or Technology', 'A taxonomy of user interests. ']	['Entertainment', 'TV/Movies Related - Entertainment', 'AlHadath (الحدث)', 'World news', 'World news']	['', '', '', 'General Worldwide News', 'General Worldwide News']	TRUE	[]	2023-07-18 19:45:00	TRUE	رياح قوية مصحوبة بأمطار غزيرة.. إعصار تاليم يضرب مناطق في جنوب #الصين ويتسبب بإجلاء نحو 230 ألف شخص #الحدث https://t.co/qlyn7992Pz	everyone	0	2011-02-01 20:40:40	#الحدث .. قناة تفاعلية تركز على الأحداث السياسية في المنطقة العربية	[]	['الحدث']	[]	Riyadh	FALSE	12128057	50	479403	7836	0	TRUE	123	رياح قوية مصحوبة بأمطار غزيرة.. إعصار تاليم يضرب مناطق في جنوب الصين ويتسبب بإجلاء نحو 230 ألف شخص الحدث	105	{}	{}	0	0	[]	0
1606347187042095125	FALSE	7	2	38	0	0	10547	245956466	ar	[]	[]	['الحدث']	[]	['https://twitter.com/AlHadath/status/1606347187042095125/video/1']	[]	[]	['Brand Vertical', 'Entities [Entity Service]', 'Brand', 'News Vertical', 'Unified Twitter Taxonomy']	['Top level entities that describe a Brands industry', 'Entity Service top level domain, every item that is in Entity Service should be in this domain', 'Brands and Companies', 'News Categories like Entertainment or Technology', 'A taxonomy of user interests. ']	['Entertainment', 'TV/Movies Related - Entertainment', 'AlHadath (الحدث)', 'World news', 'World news']	['', '', '', 'General Worldwide News', 'General Worldwide News']	TRUE	[]	2022-12-23 17:53:08	TRUE	شاهد أهالي مدينة زاهدان يشاركون في تظاهرة ضد النظام الإيراني عقب صلاة الجمعة #الحدث https://t.co/jlbqNFBt9y	everyone	0	2011-02-01 20:40:40	#الحدث .. قناة تفاعلية تركز على الأحداث السياسية في المنطقة العربية	[]	['الحدث']	[]	Riyadh	FALSE	12128057	50	479403	7836	0	TRUE	129	شاهد أهالي مدينة زاهدان يشاركون في تظاهرة ضد النظام الإيراني عقب صلاة الجمعة الحدث	84	{}	{}	0	0	[]	0
1536955718900846593	FALSE	13	6	58	0	0	0	245956466	ar	[]	[]	['شيكاغو', 'أميركا', 'الحدث']	[]	['https://twitter.com/AlHadath/status/1536955718900846593/video/1']	[]	[]	['Brand Vertical', 'Entities [Entity Service]', 'Brand', 'News Vertical', 'Unified Twitter Taxonomy']	['Top level entities that describe a Brands industry', 'Entity Service top level domain, every item that is in Entity Service should be in this domain', 'Brands and Companies', 'News Categories like Entertainment or Technology', 'A taxonomy of user interests. ']	['Entertainment', 'TV/Movies Related - Entertainment', 'AlHadath (الحدث)', 'World news', 'World news']	['', '', '', 'General Worldwide News', 'General Worldwide News']	TRUE	[]	2022-06-15 06:16:13	TRUE	حالة من الذعر انتابت سكان #شيكاغو الأميركية، بعد سماع دوي صافرات الإنذار، تحذيراً من قدوم إعصار خطير #أميركا #الحدث https://t.co/kj7mai3WC1	everyone	0	2011-02-01 20:40:40	#الحدث .. قناة تفاعلية تركز على الأحداث السياسية في المنطقة العربية	[]	['الحدث']	[]	Riyadh	FALSE	12128057	50	479403	7836	0	TRUE	131	حالة من الذعر انتابت سكان شيكاغو الأميركية، بعد سماع دوي صافرات الإنذار، تحذيراً من قدوم إعصار خطير أميركا الحدث	113	{}	{}	0	0	[]	0
1486032367646957570	FALSE	3	5	21	2	0	0	245956466	ar	[]	[]	['بلجيكا', 'كورونا', 'الحدث']	[]	['https://twitter.com/AlHadath/status/1486032367646957570/video/1']	[]	[]	['Brand Vertical', 'Entities [Entity Service]', 'Brand', 'Ongoing News Story', 'Unified Twitter Taxonomy', 'News Vertical', 'Unified Twitter Taxonomy']	['Top level entities that describe a Brands industry', 'Entity Service top level domain, every item that is in Entity Service should be in this domain', 'Brands and Companies', "Ongoing News Stories like 'Brexit'", 'A taxonomy of user interests. ', 'News Categories like Entertainment or Technology', 'A taxonomy of user interests. ']	['Entertainment', 'TV/Movies Related - Entertainment', 'AlHadath (الحدث)', 'COVID-19', 'COVID-19', 'World news', 'World news']	['', '', '', '', '', 'General Worldwide News', 'General Worldwide News']	TRUE	[]	2022-01-25 17:45:00	TRUE	كأنها حرب أهلية.. شغب في #بلجيكا ضد قيود #كورونا #الحدث https://t.co/BeaHxfGyef	everyone	0	2011-02-01 20:40:40	#الحدث .. قناة تفاعلية تركز على الأحداث السياسية في المنطقة العربية	[]	['الحدث']	[]	Riyadh	FALSE	12128057	50	479403	7836	0	TRUE	151	كأنها حرب أهلية.. شغب في بلجيكا ضد قيود كورونا الحدث	53	{}	{}	0	0	[]	0
1540949523400376320	FALSE	10	10	111	0	3	0	245956466	ar	[]	[]	['بوتين', 'الكرملين', 'روسيا', 'الحدث']	[]	['https://twitter.com/AlHadath/status/1540949523400376320/video/1']	[]	[]	['Brand Vertical', 'Entities [Entity Service]', 'Brand', 'Ongoing News Story', 'Person', 'Politician', 'Unified Twitter Taxonomy', 'Unified Twitter Taxonomy', 'Unified Twitter Taxonomy', 'News Vertical', 'Unified Twitter Taxonomy', 'Events [Entity Service]']	['Top level entities that describe a Brands industry', 'Entity Service top level domain, every item that is in Entity Service should be in this domain', 'Brands and Companies', "Ongoing News Stories like 'Brexit'", 'Named people in the world like Nelson Mandela', 'Politicians in the world, like Joe Biden', 'A taxonomy of user interests. ', 'A taxonomy of user interests. ', 'A taxonomy of user int…	['Entertainment', 'TV/Movies Related - Entertainment', 'AlHadath (الحدث)', 'Russo-Ukrainian conflict', 'Vladimir Putin', 'Vladimir Putin', 'Politics', 'Vladimir Putin', 'Political figures', 'World news', 'World news', 'Latest updates on the war in Ukraine']	['', '', '', '', 'President of Russia Vladimir Putin', 'President of Russia Vladimir Putin', 'Politics', 'President of Russia Vladimir Putin', 'Politician', 'General Worldwide News', 'General Worldwide News', 'On February 24, Russia launched an invasion of Ukraine by land, air and sea after months of tensions between Moscow and Kyiv. The attack triggered a chain of events over the next six months…	TRUE	[]	2022-06-26 06:46:10	TRUE	مشاهد تظهر موكب الرئيس الروسي فلادمير #بوتين متوجها بشكل عاجل إلى #الكرملين في ساعات الليل المتأخرة.. وسط فرضيات تقول إنه ذهب لعقد اجتماع طارئ #روسيا #الحدث https://t.co/BXfLMnHqyJ	everyone	0	2011-02-01 20:40:40	#الحدث .. قناة تفاعلية تركز على الأحداث السياسية في المنطقة العربية	[]	['الحدث']	[]	Riyadh	FALSE	12128057	50	479403	7836	0	TRUE	178	مشاهد تظهر موكب الرئيس الروسي فلادمير بوتين متوجها بشكل عاجل إلى الكرملين في ساعات الليل المتأخرة.. وسط فرضيات تقول إنه ذهب لعقد اجتماع طارئ روسيا الحدث	153	{}	{}	0	0	[]	0
1546777728329793537	FALSE	3	3	12	0	0	0	245956466	ar	[]	[]	['الحدث', 'إيران']	[]	['https://twitter.com/AlHadath/status/1546777728329793537/video/1']	[]	[]	['Brand Vertical', 'Entities [Entity Service]', 'Brand', 'News Vertical', 'Unified Twitter Taxonomy']	['Top level entities that describe a Brands industry', 'Entity Service top level domain, every item that is in Entity Service should be in this domain', 'Brands and Companies', 'News Categories like Entertainment or Technology', 'A taxonomy of user interests. ']	['Entertainment', 'TV/Movies Related - Entertainment', 'AlHadath (الحدث)', 'World news', 'World news']	['', '', '', 'General Worldwide News', 'General Worldwide News']	TRUE	[]	2022-07-12 08:45:22	TRUE	مفبرك .. #الحدث تحقق في صحة فيديو متداول لسقوط طائرة حجاج إندونيسية بـ #إيران https://t.co/dUtfr54hPn	everyone	0	2011-02-01 20:40:40	#الحدث .. قناة تفاعلية تركز على الأحداث السياسية في المنطقة العربية	[]	['الحدث']	[]	Riyadh	FALSE	12128057	50	479403	7836	0	TRUE	206	مفبرك .. الحدث تحقق في صحة فيديو متداول لسقوط طائرة حجاج إندونيسية بـ إيران	76	{}	{}	0	0	[]	0
1679909971428020224	FALSE	4	2	36	0	1	13157	245956466	ar	['باريس']	['Place']	['ماكرون', 'فرنسا', 'الحدث']	[]	['https://twitter.com/AlHadath/status/1679909971428020224/video/1']	[]	[]	['Brand Vertical', 'Entities [Entity Service]', 'Brand', 'News Vertical', 'Unified Twitter Taxonomy']	['Top level entities that describe a Brands industry', 'Entity Service top level domain, every item that is in Entity Service should be in this domain', 'Brands and Companies', 'News Categories like Entertainment or Technology', 'A taxonomy of user interests. ']	['Entertainment', 'TV/Movies Related - Entertainment', 'AlHadath (الحدث)', 'World news', 'World news']	['', '', '', 'General Worldwide News', 'General Worldwide News']	TRUE	[]	2023-07-14 17:45:23	TRUE	بحضور الرئيس #ماكرون.. موكب عسكري حول قوس النصر في العاصمة باريس احتفالاً باليوم الوطني الفرنسي #فرنسا #الحدث https://t.co/lgjefIRDwk	everyone	0	2011-02-01 20:40:40	#الحدث .. قناة تفاعلية تركز على الأحداث السياسية في المنطقة العربية	[]	['الحدث']	[]	Riyadh	FALSE	12128057	50	479403	7836	0	TRUE	244	بحضور الرئيس ماكرون.. موكب عسكري حول قوس النصر في العاصمة باريس احتفالاً باليوم الوطني الفرنسي فرنسا الحدث	108	{}	{}	0	1	[]	0
1591532604339224577	FALSE	5	2	27	0	0	0	245956466	ar	['#أوكرانيا']	['Place']	['أوكرانيا', 'روسيا', 'الحدث']	[]	['https://twitter.com/AlHadath/status/1591532604339224577/video/1']	[]	[]	['Sports League', 'Brand Vertical', 'Entities [Entity Service]', 'Business Taxonomy', 'Business Taxonomy', 'Brand', 'Unified Twitter Taxonomy', 'Unified Twitter Taxonomy', 'Unified Twitter Taxonomy', 'News Vertical', 'Unified Twitter Taxonomy', 'Events [Entity Service]']	['', 'Top level entities that describe a Brands industry', 'Entity Service top level domain, every item that is in Entity Service should be in this domain', 'Categories within Brand Verticals that narrow down the scope of Brands', 'Categories within Brand Verticals that narrow down the scope of Brands', 'Brands and Companies', 'A taxonomy of user interests. ', 'A taxonomy of user interests. ', 'A…	['EFL Championship', 'Entertainment', 'TV/Movies Related - Entertainment', 'Publisher & News Business', 'Sports & Fitness Business', 'AlHadath (الحدث)', 'EFL Championship', 'Soccer', 'Sports', 'World news', 'World news', 'Latest updates on the war in Ukraine']	['', '', '', 'Brands, companies, advertisers and every non-person handle with the profit intent related to marketing and advertiser agencies, publishers of magazines, newspapers, blogs, books', 'Brands, companies, advertisers and every non-person handle with the profit intent related to sports nutrition, athletic apparel, sports apps, fitness venues', '', '', '', 'Sports', 'General Worldwide News…	TRUE	[]	2022-11-12 20:45:16	TRUE	لقطات نشرتها وسائل إعلام روسية تظهر انفجاراً في سد "نوفا كاخوفكا" بمنطقة خيرسون جنوب #أوكرانيا، فيما اتهم الجانبان الروسي والأوكراني بعضهما البعض مراراً بالتخطيط لاختراق السد باستخدام المتفجرات، لغمر معظم المنطقة باتجاه مجرى النهر وإحداث دمار فيها #روسيا #الحدث https://t.co/cn8n4DEqwV	everyone	0	2011-02-01 20:40:40	#الحدث .. قناة تفاعلية تركز على الأحداث السياسية في المنطقة العربية	[]	['الحدث']	[]	Riyadh	FALSE	12128057	50	479403	7836	0	TRUE	234	لقطات نشرتها وسائل إعلام روسية تظهر انفجاراً في سد نوفا كاخوفكا بمنطقة خيرسون جنوب أوكرانيا، فيما اتهم الجانبان الروسي والأوكراني بعضهما البعض مراراً بالتخطيط لاختراق السد باستخدام المتفجرات، لغمر معظم المنطقة باتجاه مجرى النهر وإحداث دمار فيها روسيا الحدث	258	{}	{}	0	1	[]	0
1659239145774915587	FALSE	21	59	175	3	2	71789	245956466	ar	[]	[]	['بشار_الأسد', 'جدة', 'قمة_جدة', 'الحدث']	[]	['https://twitter.com/AlHadath/status/1659239145774915587/video/1']	[]	[]	['Person', 'Politician', 'Brand Vertical', 'Entities [Entity Service]', 'Brand', 'Unified Twitter Taxonomy', 'Unified Twitter Taxonomy', 'Unified Twitter Taxonomy', 'News Vertical', 'Unified Twitter Taxonomy']	['Named people in the world like Nelson Mandela', 'Politicians in the world, like Joe Biden', 'Top level entities that describe a Brands industry', 'Entity Service top level domain, every item that is in Entity Service should be in this domain', 'Brands and Companies', 'A taxonomy of user interests. ', 'A taxonomy of user interests. ', 'A taxonomy of user interests. ', 'News Categories like Enter…	['Bashar al-Assad', 'Bashar al-Assad', 'Entertainment', 'TV/Movies Related - Entertainment', 'AlHadath (الحدث)', 'Politics', 'Political figures', 'Bashar al-Assad', 'World news', 'World news']	['Syrian President Bashar al-Assad', 'Syrian President Bashar al-Assad', '', '', '', 'Politics', 'Politician', 'Syrian President Bashar al-Assad', 'General Worldwide News', 'General Worldwide News']	TRUE	[]	2023-05-18 16:46:54	TRUE	وصول الرئيس السوري #بشار_الأسد إلى مطار #جدة قبل قليل، للمشاركة في القمة العربية التي ستعقد غداً الجمعة #قمة_جدة #الحدث https://t.co/kHlzGSeqnR	everyone	0	2011-02-01 20:40:40	#الحدث .. قناة تفاعلية تركز على الأحداث السياسية في المنطقة العربية	[]	['الحدث']	[]	Riyadh	FALSE	12128057	50	479403	7836	0	TRUE	295	وصول الرئيس السوري بشار الأسد إلى مطار جدة قبل قليل، للمشاركة في القمة العربية التي ستعقد غداً الجمعة قمة جدة الحدث	119	{}	{}	0	0	[]	0
1212441055481729035	FALSE	46	18	252	4	2	0	245956466	ar	['واشنطن']	['Place']	['بغداد']	[]	['https://twitter.com/AlHadath/status/1212441055481729035/video/1']	[]	[]	['Brand Vertical', 'Entities [Entity Service]', 'Brand']	['Top level entities that describe a Brands industry', 'Entity Service top level domain, every item that is in Entity Service should be in this domain', 'Brands and Companies']	['Entertainment', 'TV/Movies Related - Entertainment', 'AlHadath (الحدث)']	['', '', '']	TRUE	[]	2020-01-01 18:30:48	TRUE	أكبر سفارة أميركية في العالم.. سفارة واشنطن بـ #بغداد تتميز بخصائص تجعلها فريدة عن غيرها https://t.co/uFHhLgBETX	everyone	0	2011-02-01 20:40:40	#الحدث .. قناة تفاعلية تركز على الأحداث السياسية في المنطقة العربية	[]	['الحدث']	[]	Riyadh	FALSE	12128057	50	479403	7836	0	TRUE	316	أكبر سفارة أميركية في العالم.. سفارة واشنطن بـ بغداد تتميز بخصائص تجعلها فريدة عن غيرها	88	{}	{}	0	1	[]	0
1544385281297711104	FALSE	11	11	61	22	0	0	245956466	ar	['#السودان']	['Place']	['السودان', 'الحدث_عاجل']	[]	['https://twitter.com/AlHadath/status/1544385281297711104/photo/1']	[]	[]	['Brand Vertical', 'Entities [Entity Service]', 'Brand', 'News Vertical', 'Unified Twitter Taxonomy', 'Events [Entity Service]']	['Top level entities that describe a Brands industry', 'Entity Service top level domain, every item that is in Entity Service should be in this domain', 'Brands and Companies', 'News Categories like Entertainment or Technology', 'A taxonomy of user interests. ', 'Real world events. ']	['Entertainment', 'TV/Movies Related - Entertainment', 'AlHadath (الحدث)', 'World news', 'World news', 'السودان: إطلاق قنابل الغاز على مظاهرات جديدة تطالب بالحكم المدني ']	['', '', '', 'General Worldwide News', 'General Worldwide News', 'عاد آلاف السودانيين إلى التظاهر في عدة مناطق من البلاد للمطالبة بحكم مدني، فيما أطلقت قوات الأمن القنابل المسيلة للدموع لتفريق مئات المحتجين بالقرب من القصر الرئاسي. وندد المتظاهرون بالاتفاق السياسي الذي وقعه رئيس الوزراء عبدالله حمدوك مع قائد الجيش ورئيس مجلس السيادة الانتقالي عبدالفتاح البرهان الشهر الماضي. \nوقالت قنوات عربية إن…	TRUE	[]	2022-07-05 18:18:39	TRUE	#السودان — البرهان يعفي الأعضاء الخمسة المدنيين في مجلس السيادة #الحدث_عاجل https://t.co/yN4Olj50st	everyone	0	2011-02-01 20:40:40	#الحدث .. قناة تفاعلية تركز على الأحداث السياسية في المنطقة العربية	[]	['الحدث']	[]	Riyadh	FALSE	12128057	50	479403	7836	0	TRUE	343	السودان البرهان يعفي الأعضاء الخمسة المدنيين في مجلس السيادة الحدث عاجل	74	{}	{}	0	1	[]	0
1544008990652342279	FALSE	12	20	72	15	4	0	245956466	ar	[]	[]	['السودان', 'الحدث']	[]	['https://twitter.com/AlHadath/status/1544008990652342279/video/1']	[]	[]	['Brand Vertical', 'Entities [Entity Service]', 'Brand', 'News Vertical', 'Unified Twitter Taxonomy', 'Events [Entity Service]']	['Top level entities that describe a Brands industry', 'Entity Service top level domain, every item that is in Entity Service should be in this domain', 'Brands and Companies', 'News Categories like Entertainment or Technology', 'A taxonomy of user interests. ', 'Real world events. ']	['Entertainment', 'TV/Movies Related - Entertainment', 'AlHadath (الحدث)', 'World news', 'World news', 'السودان: إطلاق قنابل الغاز على مظاهرات جديدة تطالب بالحكم المدني ']	['', '', '', 'General Worldwide News', 'General Worldwide News', 'عاد آلاف السودانيين إلى التظاهر في عدة مناطق من البلاد للمطالبة بحكم مدني، فيما أطلقت قوات الأمن القنابل المسيلة للدموع لتفريق مئات المحتجين بالقرب من القصر الرئاسي. وندد المتظاهرون بالاتفاق السياسي الذي وقعه رئيس الوزراء عبدالله حمدوك مع قائد الجيش ورئيس مجلس السيادة الانتقالي عبدالفتاح البرهان الشهر الماضي. \nوقالت قنوات عربية إن…	TRUE	[]	2022-07-04 17:23:24	TRUE	رئيس مجلس السيادة في #السودان عبدالفتاح البرهان يعلن عدم مشاركة المؤسسة العسكرية في المفاوضات الجارية حاليًا.. ونأمل تنخرط القوى في حوار فوري وجاد #الحدث https://t.co/H7Ncf8LqQd	everyone	0	2011-02-01 20:40:40	#الحدث .. قناة تفاعلية تركز على الأحداث السياسية في المنطقة العربية	[]	['الحدث']	[]	Riyadh	FALSE	12128057	50	479403	7836	0	TRUE	343	رئيس مجلس السيادة في السودان عبدالفتاح البرهان يعلن عدم مشاركة المؤسسة العسكرية في المفاوضات الجارية حاليًا.. ونأمل تنخرط القوى في حوار فوري وجاد الحدث	152	{}	{}	0	0	[]	0
1544011968494931970	FALSE	1	2	31	0	0	0	245956466	ar	['عبدالفتاح البرهان']	['Person']	['السودان', 'الحدث']	[]	['https://twitter.com/AlHadath/status/1544011968494931970/video/1']	[]	[]	['Brand Vertical', 'Entities [Entity Service]', 'Brand', 'News Vertical', 'Unified Twitter Taxonomy', 'Events [Entity Service]']	['Top level entities that describe a Brands industry', 'Entity Service top level domain, every item that is in Entity Service should be in this domain', 'Brands and Companies', 'News Categories like Entertainment or Technology', 'A taxonomy of user interests. ', 'Real world events. ']	['Entertainment', 'TV/Movies Related - Entertainment', 'AlHadath (الحدث)', 'World news', 'World news', 'السودان: إطلاق قنابل الغاز على مظاهرات جديدة تطالب بالحكم المدني ']	['', '', '', 'General Worldwide News', 'General Worldwide News', 'عاد آلاف السودانيين إلى التظاهر في عدة مناطق من البلاد للمطالبة بحكم مدني، فيما أطلقت قوات الأمن القنابل المسيلة للدموع لتفريق مئات المحتجين بالقرب من القصر الرئاسي. وندد المتظاهرون بالاتفاق السياسي الذي وقعه رئيس الوزراء عبدالله حمدوك مع قائد الجيش ورئيس مجلس السيادة الانتقالي عبدالفتاح البرهان الشهر الماضي. \nوقالت قنوات عربية إن…	TRUE	[]	2022-07-04 17:35:14	TRUE	رئيس مجلس السيادة في #السودان عبدالفتاح البرهان: سيتم حل مجلس السيادة بعد تشكيل الحكومة التنفيذية يتبعها تشكيل مجلس أعلى للقوات المسلحة #الحدث https://t.co/dDlXMVwej4	everyone	0	2011-02-01 20:40:40	#الحدث .. قناة تفاعلية تركز على الأحداث السياسية في المنطقة العربية	[]	['الحدث']	[]	Riyadh	FALSE	12128057	50	479403	7836	0	TRUE	343	رئيس مجلس السيادة في السودان عبدالفتاح البرهان: سيتم حل مجلس السيادة بعد تشكيل الحكومة التنفيذية يتبعها تشكيل مجلس أعلى للقوات المسلحة الحدث	141	{}	{}	0	1	[]	0
1544020797643231240	FALSE	6	7	27	0	0	0	245956466	ar	['النصر']	['Organization']	['السودان', 'الحدث']	[]	['https://twitter.com/AlHadath/status/1544020797643231240/video/1']	[]	[]	['Brand Vertical', 'Entities [Entity Service]', 'Brand', 'News Vertical', 'Unified Twitter Taxonomy', 'Events [Entity Service]']	['Top level entities that describe a Brands industry', 'Entity Service top level domain, every item that is in Entity Service should be in this domain', 'Brands and Companies', 'News Categories like Entertainment or Technology', 'A taxonomy of user interests. ', 'Real world events. ']	['Entertainment', 'TV/Movies Related - Entertainment', 'AlHadath (الحدث)', 'World news', 'World news', 'السودان: إطلاق قنابل الغاز على مظاهرات جديدة تطالب بالحكم المدني ']	['', '', '', 'General Worldwide News', 'General Worldwide News', 'عاد آلاف السودانيين إلى التظاهر في عدة مناطق من البلاد للمطالبة بحكم مدني، فيما أطلقت قوات الأمن القنابل المسيلة للدموع لتفريق مئات المحتجين بالقرب من القصر الرئاسي. وندد المتظاهرون بالاتفاق السياسي الذي وقعه رئيس الوزراء عبدالله حمدوك مع قائد الجيش ورئيس مجلس السيادة الانتقالي عبدالفتاح البرهان الشهر الماضي. \nوقالت قنوات عربية إن…	TRUE	[]	2022-07-04 18:10:19	TRUE	رئيس مجلس السيادة في #السودان عبدالفتاح البرهان: الوطن فوق الجميع وغير خاضع لحسابات النصر أو الهزيمة بين الخصوم.. وملتزمون بدعم تحقيق أهداف ثورة ديسمبر المجيدة #الحدث https://t.co/ciBCD3zEUQ	everyone	0	2011-02-01 20:40:40	#الحدث .. قناة تفاعلية تركز على الأحداث السياسية في المنطقة العربية	[]	['الحدث']	[]	Riyadh	FALSE	12128057	50	479403	7836	0	TRUE	343	رئيس مجلس السيادة في السودان عبدالفتاح البرهان: الوطن فوق الجميع وغير خاضع لحسابات النصر أو الهزيمة بين الخصوم.. وملتزمون بدعم تحقيق أهداف ثورة ديسمبر المجيدة الحدث	165	{}	{}	0	1	['النصر']	1
1388475803147673606	FALSE	201	44	289	24	5	0	245956466	ar	[]	[]	['السعودية', 'كبتاغون', 'لبنان', 'الكويت', 'إيران', 'الحدث']	[]	['https://twitter.com/AlHadath/status/1388475803147673606/video/1']	[]	[]	['Brand Vertical', 'Entities [Entity Service]', 'Brand', 'Entities [Entity Service]', 'Entities [Entity Service]']	['Top level entities that describe a Brands industry', 'Entity Service top level domain, every item that is in Entity Service should be in this domain', 'Brands and Companies', 'Entity Service top level domain, every item that is in Entity Service should be in this domain', 'Entity Service top level domain, every item that is in Entity Service should be in this domain']	['Entertainment', 'TV/Movies Related - Entertainment', 'AlHadath (الحدث)', 'Generic Food', 'Fruits']	['', '', '', 'Generic Food', 'Fruits']	TRUE	[]	2021-05-01 12:50:02	TRUE	بعد أيام من إحباط #السعودية محاولة تهريب #كبتاغون في قلب شحنة رمُان من #لبنان.. #الكويت تحبط تهريب 16 كيلو مخدرات محشوة في شحنة أسماك "هامور" قادمة من #إيران #الحدث https://t.co/vF5S9TlGQT	everyone	0	2011-02-01 20:40:40	#الحدث .. قناة تفاعلية تركز على الأحداث السياسية في المنطقة العربية	[]	['الحدث']	[]	Riyadh	FALSE	12128057	50	479403	7836	0	TRUE	446	بعد أيام من إحباط السعودية محاولة تهريب كبتاغون في قلب شحنة رمُان من لبنان.. الكويت تحبط تهريب 16 كيلو مخدرات محشوة في شحنة أسماك هامور قادمة من إيران الحدث	157	{}	{}	0	0	[]	0
1401158281947750400	FALSE	8	6	56	1	0	0	245956466	ar	[]	[]	['غزة', 'مصر', 'الحدث']	[]	['https://twitter.com/AlHadath/status/1401158281947750400/video/1']	[]	[]	['Brand Vertical', 'Entities [Entity Service]', 'Brand', 'Unified Twitter Taxonomy', 'News Vertical', 'Unified Twitter Taxonomy']	['Top level entities that describe a Brands industry', 'Entity Service top level domain, every item that is in Entity Service should be in this domain', 'Brands and Companies', 'A taxonomy of user interests. ', 'News Categories like Entertainment or Technology', 'A taxonomy of user interests. ']	['Entertainment', 'TV/Movies Related - Entertainment', 'AlHadath (الحدث)', 'Popular Videos', 'World news', 'World news']	['', '', '', '', 'General Worldwide News', 'General Worldwide News']	TRUE	[]	2021-06-05 12:45:41	TRUE	شاهد.. معدات وأطقم هندسية مصرية تدخل قطاع #غزة لإعادة إعماره #مصر #الحدث https://t.co/9IoPFKmaDd	everyone	0	2011-02-01 20:40:40	#الحدث .. قناة تفاعلية تركز على الأحداث السياسية في المنطقة العربية	[]	['الحدث']	[]	Riyadh	FALSE	12128057	50	479403	7836	0	TRUE	493	شاهد.. معدات وأطقم هندسية مصرية تدخل قطاع غزة لإعادة إعماره مصر الحدث	70	{}	{}	0	0	[]	0
1586663035288027136	FALSE	1	1	22	0	0	0	245956466	ar	[]	[]	['تويتر', 'ترمب', 'الحدث']	[]	['https://twitter.com/AlHadath/status/1586663035288027136/video/1']	[]	[]	['Person', 'Politician', 'Brand Vertical', 'Entities [Entity Service]', 'Business Taxonomy', 'Business Taxonomy', 'Brand', 'Unified Twitter Taxonomy', 'Unified Twitter Taxonomy', 'Unified Twitter Taxonomy', 'Person', 'Entities [Entity Service]', 'Brand', 'Interests and Hobbies Vertical', 'Interests and Hobbies Category', 'Unified Twitter Taxonomy', 'Unified Twitter Taxonomy', 'Unified Twitter Tax…	['Named people in the world like Nelson Mandela', 'Politicians in the world, like Joe Biden', 'Top level entities that describe a Brands industry', 'Entity Service top level domain, every item that is in Entity Service should be in this domain', 'Categories within Brand Verticals that narrow down the scope of Brands', 'Categories within Brand Verticals that narrow down the scope of Brands', 'Bran…	['Donald Trump', 'Donald Trump', 'Entertainment', 'TV/Movies Related - Entertainment', 'Financial Services Business', 'Technology Business', 'AlHadath (الحدث)', 'Donald Trump', 'Politics', 'Political figures', 'Elon Musk', 'Services', 'X', 'Business & finance', 'Leadership', 'Elon Musk', 'Tech personalities', 'Business personalities', 'World news', 'World news', 'Justice Department says seized Ma…	['45th US President, Donald Trump', '45th US President, Donald Trump', '', '', 'Brands, companies, advertisers and every non-person handle with the profit intent related to Banks, Credit cards, Insurance, Investments, Stocks ', 'Brands, companies, advertisers and every non-person handle with the profit intent related to softwares, apps, communication equipments, hardwares', '', '45th US President…	TRUE	[]	2022-10-30 10:15:21	TRUE	الملياردير الأميركي إيلون ماسك يقيل 4 من أهم مدراء #تويتر بينهم المسؤول عن حظر #ترمب #الحدث https://t.co/M083h2BSsw	everyone	0	2011-02-01 20:40:40	#الحدث .. قناة تفاعلية تركز على الأحداث السياسية في المنطقة العربية	[]	['الحدث']	[]	Riyadh	FALSE	12128057	50	479403	7836	0	TRUE	690	الملياردير الأميركي إيلون ماسك يقيل 4 من أهم مدراء تويتر بينهم المسؤول عن حظر ترمب الحدث	90	{}	{}	0	0	[]	0
1583446760420044800	FALSE	43	6	175	0	0	0	245956466	ar	[]	[]	['إيران', 'الحدث']	[]	['https://twitter.com/AlHadath/status/1583446760420044800/video/1']	[]	[]	['Brand Vertical', 'Entities [Entity Service]', 'Brand', 'News Vertical', 'Unified Twitter Taxonomy']	['Top level entities that describe a Brands industry', 'Entity Service top level domain, every item that is in Entity Service should be in this domain', 'Brands and Companies', 'News Categories like Entertainment or Technology', 'A taxonomy of user interests. ']	['Entertainment', 'TV/Movies Related - Entertainment', 'AlHadath (الحدث)', 'World news', 'World news']	['', '', '', 'General Worldwide News', 'General Worldwide News']	TRUE	[]	2022-10-21 13:15:01	TRUE	#إيران ـ متظاهرون يضربون عنصر باسيج بعد اعتدائه على فتاة خلعت حجابها #الحدث https://t.co/S8DpdhonB8	everyone	1	2011-02-01 20:40:40	#الحدث .. قناة تفاعلية تركز على الأحداث السياسية في المنطقة العربية	[]	['الحدث']	[]	Riyadh	FALSE	12128057	50	479403	7836	0	TRUE	707	إيران ـ متظاهرون يضربون عنصر باسيج بعد اعتدائه على فتاة خلعت حجابها الحدث	75	{}	{}	0	0	[]	0
1575052925071753218	FALSE	5	8	53	0	0	0	245956466	ar	['الملك سلمان', 'محمد بن سلمان رئيسًا']	['Person', 'Person']	['السعودية', 'الحدث']	[]	['https://twitter.com/AlHadath/status/1575052925071753218/video/1']	[]	[]	['Person', 'Politician', 'Brand Vertical', 'Entities [Entity Service]', 'Brand', 'Unified Twitter Taxonomy', 'Unified Twitter Taxonomy', 'Unified Twitter Taxonomy', 'News Vertical', 'Unified Twitter Taxonomy', 'Events [Entity Service]']	['Named people in the world like Nelson Mandela', 'Politicians in the world, like Joe Biden', 'Top level entities that describe a Brands industry', 'Entity Service top level domain, every item that is in Entity Service should be in this domain', 'Brands and Companies', 'A taxonomy of user interests. ', 'A taxonomy of user interests. ', 'A taxonomy of user interests. ', 'News Categories like Enter…	['Mohammed bin Salman', 'Mohammed bin Salman', 'Entertainment', 'TV/Movies Related - Entertainment', 'AlHadath (الحدث)', 'Politics', 'Political figures', 'Mohammed bin Salman', 'World news', 'World news', 'ولي العهد السعودي يفتتح منتدى مبادرة السعودية الخضراء']	['Mohammed bin Salman (محمد بن سلمان)\nCrown Prince of Saudi Arabia', 'Mohammed bin Salman (محمد بن سلمان)\nCrown Prince of Saudi Arabia', '', '', '', 'Politics', 'Politician', 'Mohammed bin Salman (محمد بن سلمان)\nCrown Prince of Saudi Arabia', 'General Worldwide News', 'General Worldwide News', 'أطلق ولي العهد السعودي الأمير محمد بن سلمان، اليوم السبت، النسخة الأولى للمنتدى السنوي لمبادرة السعو…	TRUE	[]	2022-09-28 09:20:55	TRUE	#السعودية .. الملك سلمان يأمر بتعيين ولي العهد الأمير محمد بن سلمان رئيسًا للوزراء #الحدث https://t.co/6Uc5cyzlHs	everyone	0	2011-02-01 20:40:40	#الحدث .. قناة تفاعلية تركز على الأحداث السياسية في المنطقة العربية	[]	['الحدث']	[]	Riyadh	FALSE	12128057	50	479403	7836	0	TRUE	770	السعودية .. الملك سلمان يأمر بتعيين ولي العهد الأمير محمد بن سلمان رئيسًا للوزراء الحدث	88	{}	{}	0	2	[]	0
1556430685396664320	FALSE	36	25	152	5	0	0	245956466	ar	[]	[]	['صنعاء', 'ميليشيات_الحوثي', 'اليمن', 'الحدث']	[]	['https://twitter.com/AlHadath/status/1556430685396664320/video/1']	[]	[]	['Brand Vertical', 'Entities [Entity Service]', 'Brand', 'News Vertical', 'Unified Twitter Taxonomy']	['Top level entities that describe a Brands industry', 'Entity Service top level domain, every item that is in Entity Service should be in this domain', 'Brands and Companies', 'News Categories like Entertainment or Technology', 'A taxonomy of user interests. ']	['Entertainment', 'TV/Movies Related - Entertainment', 'AlHadath (الحدث)', 'World news', 'World news']	['', '', '', 'General Worldwide News', 'General Worldwide News']	TRUE	[]	2022-08-08 00:02:47	TRUE	شاهد بالفيديو.. 4 انفجارات عنيفة تهز جنوب شرق #صنعاء تزامناً مع فشل محاولة #ميليشيات_الحوثي نقل صاروخ بالسيتي داخل أحد معسكراتها #اليمن #الحدث https://t.co/xI61SzmPna	everyone	1	2011-02-01 20:40:40	#الحدث .. قناة تفاعلية تركز على الأحداث السياسية في المنطقة العربية	[]	['الحدث']	[]	Riyadh	FALSE	12128057	50	479403	7836	0	TRUE	884	شاهد بالفيديو.. 4 انفجارات عنيفة تهز جنوب شرق صنعاء تزامناً مع فشل محاولة ميليشيات الحوثي نقل صاروخ بالسيتي داخل أحد معسكراتها اليمن الحدث	139	{}	{}	0	0	[]	0
1687966813181644800	FALSE	94	31	1053	10	3	44081	1503919452995345920	ar	['النيجر']	['Place']	[]	[]	['https://twitter.com/russiaArb4/status/1687966813181644800/video/1']	[]	[]	[]	[]	[]	[]	TRUE	[]	2023-08-05 23:20:23	TRUE	وصلت طائرة نقل عسكرية روسية إلى عاصمة النيجر نيامي وانباء عن وصول قوات فاغنر لمساعده المجلس العسكري في النيجر 🇷🇺✈️🇳🇪 https://t.co/9OqijX1P04	everyone	1	2022-03-16 02:22:54	المنصة والمصدر الأول لنقل الأخبار والشؤون الروسية والعالمية اولاً بأول باللغة العربية 🛰️	[]	['الحدث']	[]	Moscow Russia	FALSE	289529	1	18600	289	1725	FALSE	79	وصلت طائرة نقل عسكرية روسية إلى عاصمة النيجر نيامي وانباء عن وصول قوات فاغنر لمساعده المجلس العسكري في النيجر	111	{'🇳🇪': 'flag: Niger', '✈️': 'airplane', '🇷🇺': 'flag: Russia'}	{'🇳🇪': 1, '✈️': 1, '🇷🇺': 1}	3	1	[]	0
1681443070083039232	FALSE	20	14	113	6	1	14624	1503919452995345920	ar	[]	[]	['الصينية']	[]	['https://twitter.com/russiaArb4/status/1681443070083039232/video/1']	[]	[]	[]	[]	[]	[]	TRUE	[]	2023-07-18 23:17:22	TRUE	ركزو مشهد من جزيرة ليتشو #الصينية:🇨🇳 لاعصار 🌪️ تاليم https://t.co/s9cJq3hfZF	everyone	1	2022-03-16 02:22:54	المنصة والمصدر الأول لنقل الأخبار والشؤون الروسية والعالمية اولاً بأول باللغة العربية 🛰️	[]	['الحدث']	[]	Moscow Russia	FALSE	289529	1	18600	289	1725	FALSE	123	ركزو مشهد من جزيرة ليتشو الصينية: لاعصار تاليم	50	{'🇨🇳': 'flag: China', '🌪️': 'tornado'}	{'🇨🇳': 1, '🌪️': 1}	2	0	[]	0
1677864504317583360	FALSE	370	48	901	38	19	188863	1503919452995345920	ar	[]	[]	['فرنسا']	[]	['https://twitter.com/russiaArb4/status/1677864504317583360/video/1']	[]	[]	[]	[]	[]	[]	TRUE	[]	2023-07-09 02:17:25	TRUE	قبل قليل مواطن فرنسي يقوم بدهس المتظاهرين من المهاجرين #فرنسا https://t.co/7IRqQTAM8d	everyone	1	2022-03-16 02:22:54	المنصة والمصدر الأول لنقل الأخبار والشؤون الروسية والعالمية اولاً بأول باللغة العربية 🛰️	[]	['الحدث']	[]	Moscow Russia	FALSE	289529	1	18600	289	1725	FALSE	139	قبل قليل مواطن فرنسي يقوم بدهس المتظاهرين من المهاجرين فرنسا	62	{}	{}	0	0	[]	0
1695523730204590507	FALSE	11	4	57	3	3	11742	1503919452995345920	ar	['دبي']	['Place']	[]	[]	['https://twitter.com/russiaArb4/status/1695523730204590507/video/1']	[]	[]	['Business Taxonomy']	['Categories within Brand Verticals that narrow down the scope of Brands']	['Technology Business']	['Brands, companies, advertisers and every non-person handle with the profit intent related to softwares, apps, communication equipments, hardwares']	TRUE	[]	2023-08-26 19:48:53	TRUE	قال كلاوس شواب إن القمة العالمية للحكومات يجب أن "تتقن" الذكاء الاصطناعي للسيطرة على البشرية تحدث مؤسس المنتدى الاقتصادي العالمي كلاوس شواب في القمة العالمية للحكومات 2023 في دبي 🇦🇪 وموضوعها هذا العام هو تشكيل حكومات المستقبل. https://t.co/MZ7FvI0sa1	everyone	0	2022-03-16 02:22:54	المنصة والمصدر الأول لنقل الأخبار والشؤون الروسية والعالمية اولاً بأول باللغة العربية 🛰️	[]	['الحدث']	[]	Moscow Russia	FALSE	289529	1	18600	289	1725	FALSE	20	قال كلاوس شواب إن القمة العالمية للحكومات يجب أن تتقن الذكاء الاصطناعي للسيطرة على البشرية تحدث مؤسس المنتدى الاقتصادي العالمي كلاوس شواب في القمة العالمية للحكومات 2023 في دبي وموضوعها هذا العام هو تشكيل حكومات المستقبل.	224	{'🇦🇪': 'flag: United Arab Emirates'}	{'🇦🇪': 1}	1	1	[]	0
1692656851471470843	FALSE	144	71	654	15	10	133451	1503919452995345920	ar	['العراق', 'بغداد']	['Place', 'Place']	[]	[]	['https://twitter.com/russiaArb4/status/1692656851471470843/video/1']	[]	[]	[]	[]	[]	[]	TRUE	[]	2023-08-18 21:56:56	TRUE	في العراق القوات الأمريكية تتجول في شوارع الأعظمية وتحركات مكثفه على الحدود السوريه العراقيه وانباء عن سيطرت القوات الامريكيه على مطار بغداد https://t.co/1amVZg6ltu	everyone	1	2022-03-16 02:22:54	المنصة والمصدر الأول لنقل الأخبار والشؤون الروسية والعالمية اولاً بأول باللغة العربية 🛰️	[]	['الحدث']	[]	Moscow Russia	FALSE	289529	1	18600	289	1725	FALSE	46	في العراق القوات الأمريكية تتجول في شوارع الأعظمية وتحركات مكثفه على الحدود السوريه العراقيه وانباء عن سيطرت القوات الامريكيه على مطار بغداد	142	{}	{}	0	2	[]	0
1682562532773437441	FALSE	44	7	276	4	1	14384	1503919452995345920	ar	[]	[]	['صربيا']	[]	['https://twitter.com/russiaArb4/status/1682562532773437441/video/1']	[]	[]	[]	[]	[]	[]	TRUE	[]	2023-07-22 01:25:42	TRUE	آلاف العوائل مع أطفالهم يتظاهرون في #صربيا ضد مسيرة الفخر للشواذ:🏳️‍🌈 والمتحولين 🏳️‍⚧️جنسيا المقرر إجراؤها بعد أيام وعادة الشواذ الذين يخرجون عراة إلى الشوارع . https://t.co/D0LfCJezgs	everyone	1	2022-03-16 02:22:54	المنصة والمصدر الأول لنقل الأخبار والشؤون الروسية والعالمية اولاً بأول باللغة العربية 🛰️	[]	['الحدث']	[]	Moscow Russia	FALSE	289529	1	18600	289	1725	FALSE	119	آلاف العوائل مع أطفالهم يتظاهرون في صربيا ضد مسيرة الفخر للشواذ: والمتحولين جنسيا المقرر إجراؤها بعد أيام وعادة الشواذ الذين يخرجون عراة إلى الشوارع .	153	{'🏳️\u200d🌈': 'rainbow flag', '🏳️\u200d⚧️': 'transgender flag'}	{'🏳️\u200d🌈': 1, '🏳️\u200d⚧️': 1}	2	0	[]	0
1685904164860141568	FALSE	0	2	2	0	0	363	1334970370206686976	ar	['حي ركن الدين بالرصاص']	['Place']	['الثورة_السورية']	[]	['https://twitter.com/pvSScBsybeozsB8/status/1685904164860141568/video/1']	[]	[]	[]	[]	[]	[]	TRUE	[]	2023-07-31 06:44:10	TRUE	انتفضوا لنعيد سيرتها الاولى شبيحة النظام تواجه مظاهرات خرجت في حي ركن الدين بالرصاص #الثورة_السورية https://t.co/soB9nRBXnI	everyone	1	2020-12-04 21:18:51	إِنْ لَمْ تَكُنْ تَحمِلُ هَمّا لِلأُمَّـةِ ، فَأَنْتَ هَمٌّ عَلَيْهَا...	[]	['الحدث']	[]	Syria	FALSE	1990	2092	12350	1	58963	FALSE	88	انتفضوا لنعيد سيرتها الاولى شبيحة النظام تواجه مظاهرات خرجت في حي ركن الدين بالرصاص الثورة السورية	101	{}	{}	0	1	[]	0
1698911853018333278	FALSE	0	0	3	0	0	161	1334970370206686976	ar	['ادلب']	['Place']	['إدلب_تحت_قصف']	[]	['https://twitter.com/pvSScBsybeozsB8/status/1698911853018333278/video/1']	[]	[]	[]	[]	[]	[]	TRUE	[]	2023-09-05 04:12:04	TRUE	القصف على ريف ادلب من اعلام الاحتلال الاسدي #إدلب_تحت_قصف https://t.co/D2f3gL6ZoO	everyone	1	2020-12-04 21:18:51	إِنْ لَمْ تَكُنْ تَحمِلُ هَمّا لِلأُمَّـةِ ، فَأَنْتَ هَمٌّ عَلَيْهَا...	[]	['الحدث']	[]	Syria	FALSE	1990	2092	12350	1	58963	FALSE	5	القصف على ريف ادلب من اعلام الاحتلال الاسدي إدلب تحت قصف	59	{}	{}	0	1	[]	0
1697714892688506934	FALSE	0	0	8	0	0	1370	1334970370206686976	ar	[]	[]	['عاجـــــــــل', 'ديرالزور', 'ديرالزور_تنتفض']	[]	['https://twitter.com/pvSScBsybeozsB8/status/1697714892688506934/video/1']	[]	[]	[]	[]	[]	[]	TRUE	[]	2023-09-01 20:55:47	TRUE	#عاجـــــــــل #ديرالزور التحالف الدولي يقصف المواقع الإيرانية في مدينة البوكمال الآن #ديرالزور_تنتفض https://t.co/VXT5fjpK2l	everyone	1	2020-12-04 21:18:51	إِنْ لَمْ تَكُنْ تَحمِلُ هَمّا لِلأُمَّـةِ ، فَأَنْتَ هَمٌّ عَلَيْهَا...	[]	['الحدث']	[]	Syria	FALSE	1990	2092	12350	1	58963	FALSE	12	عاجـــــــــل ديرالزور التحالف الدولي يقصف المواقع الإيرانية في مدينة البوكمال الآن ديرالزور تنتفض	100	{}	{}	0	0	[]	0
1687085274482794497	FALSE	569	94	1941	27	42	214721	1167441727977902080	ar	[]	[]	['النيجر', 'مالي', 'بوركينا_فاسو', 'غينيا', 'افريقيا_الوسطى', 'السنغال']	[]	['https://twitter.com/Roaastudies/status/1687085274482794497/video/1']	[]	[]	[]	[]	[]	[]	TRUE	[]	2023-08-03 12:57:28	TRUE	إفريقيا بدأت تنفض عن نفسها الغبار الفرنسي. #النيجر #مالي #بوركينا_فاسو #غينيا #افريقيا_الوسطى #السنغال https://t.co/ov1LC30yMi	everyone	1	2019-08-30 14:19:51	ننقل هنا أخبار وتفاصيل الحروب من الأطراف المتنازعة، نناقش، نحلل، ونعرض جميع (الرؤى) أبحاثنا في قائمة المفضلة، الحساب البديل: @RoaaStudy	[]	[]	[]		FALSE	372046	1544	45306	644	94	FALSE	80	إفريقيا بدأت تنفض عن نفسها الغبار الفرنسي. النيجر مالي بوركينا فاسو غينيا افريقيا الوسطى السنغال	99	{}	{}	0	0	[]	0
1681377172571684874	FALSE	13	9	182	3	3	32095	1167441727977902080	ar	[]	[]	[]	[]	['https://twitter.com/Roaastudies/status/1681377172571684874/video/1']	[]	[]	[]	[]	[]	[]	TRUE	[]	2023-07-18 18:55:31	TRUE	🚨🚨🚨 لقطات جديدة من القصف الروسي على أهداف في أوديسا. https://t.co/3NPYvnQN9u	everyone	1	2019-08-30 14:19:51	ننقل هنا أخبار وتفاصيل الحروب من الأطراف المتنازعة، نناقش، نحلل، ونعرض جميع (الرؤى) أبحاثنا في قائمة المفضلة، الحساب البديل: @RoaaStudy	[]	[]	[]		FALSE	372046	1544	45306	644	94	FALSE	127	لقطات جديدة من القصف الروسي على أهداف في أوديسا.	50	{'🚨': 'police car light'}	{'🚨': 3}	3	0	[]	0
1697153430345670750	FALSE	13	5	172	1	2	47248	1167441727977902080	ar	[]	[]	['فلسطين', 'نابلس']	[]	['https://twitter.com/Roaastudies/status/1697153430345670750/video/1']	[]	[]	[]	[]	[]	[]	TRUE	[]	2023-08-31 07:44:44	TRUE	#فلسطين #نابلس لحظة انفجار عبوة ناسفة على جنود إسرائيليين خلال اقتحام نابلس. https://t.co/d2lVM3Uvvx	everyone	1	2019-08-30 14:19:51	ننقل هنا أخبار وتفاصيل الحروب من الأطراف المتنازعة، نناقش، نحلل، ونعرض جميع (الرؤى) أبحاثنا في قائمة المفضلة، الحساب البديل: @RoaaStudy	[]	[]	[]		FALSE	372046	1544	45306	644	94	FALSE	17	فلسطين نابلس لحظة انفجار عبوة ناسفة على جنود إسرائيليين خلال اقتحام نابلس.	77	{}	{}	0	0	[]	0
1647133539731742724	FALSE	14	4	71	1	2	28121	1167441727977902080	ar	['شارع دارزي', 'بوردو الفرنسية']	['Place', 'Place']	[]	[]	['https://twitter.com/Roaastudies/status/1647133539731742724/video/1']	[]	[]	[]	[]	[]	[]	TRUE	[]	2023-04-15 07:03:32	TRUE	سائق سيارة يفقد السيطرة عليها ويدهس حشدا من الناس في شارع دارزي بمدينة بوردو الفرنسية، أصيب سبعة أشخاص اثنان منهم بجروح خطيرة. https://t.co/2yQMC9oK4b	everyone	0	2019-08-30 14:19:51	ننقل هنا أخبار وتفاصيل الحروب من الأطراف المتنازعة، نناقش، نحلل، ونعرض جميع (الرؤى) أبحاثنا في قائمة المفضلة، الحساب البديل: @RoaaStudy	[]	[]	[]		FALSE	372046	1544	45306	644	94	FALSE	139	سائق سيارة يفقد السيطرة عليها ويدهس حشدا من الناس في شارع دارزي بمدينة بوردو الفرنسية، أصيب سبعة أشخاص اثنان منهم بجروح خطيرة.	127	{}	{}	0	2	[]	0
1591329469712977921	FALSE	6	11	112	1	2	0	1167441727977902080	ar	[]	[]	[]	[]	['https://twitter.com/Roaastudies/status/1591329469712977921/video/1']	[]	[]	[]	[]	[]	[]	TRUE	[]	2022-11-12 07:18:05	TRUE	بعد تفجيرهم لجسر أنتونوفسكي في خيرسون... الروس يفجرون جسر نوفاكاخوفكا الرابط بين ضفتي نهر دنيبرو. https://t.co/0doRoIUynq	everyone	0	2019-08-30 14:19:51	ننقل هنا أخبار وتفاصيل الحروب من الأطراف المتنازعة، نناقش، نحلل، ونعرض جميع (الرؤى) أبحاثنا في قائمة المفضلة، الحساب البديل: @RoaaStudy	[]	[]	[]		FALSE	372046	1544	45306	644	94	FALSE	234	بعد تفجيرهم لجسر أنتونوفسكي في خيرسون... الروس يفجرون جسر نوفاكاخوفكا الرابط بين ضفتي نهر دنيبرو.	98	{}	{}	0	0	[]	0
1662731099720630272	FALSE	111	150	1037	17	27	273313	1167441727977902080	ar	['إيران']	['Place']	['طالبان']	[]	['https://twitter.com/Roaastudies/status/1662731099720630272/video/1']	[]	[]	['Unified Twitter Taxonomy', 'Sports Event', 'Events [Entity Service]', 'Cricket Match']	['A taxonomy of user interests. ', '', 'Real world events. ', 'Sports Event specific to Cricket matches']	['Crisis in Afghanistan', 'Chennai Super Kings vs Lucknow Super Giants', 'Chennai Super Kings vs Lucknow Super Giants', 'Chennai Super Kings vs Lucknow Super Giants']	['', '', '', '']	TRUE	[]	2023-05-28 08:02:40	TRUE	#طالبان: تدمير ما مجموعه 18 منشأة حدودية إيرانية كان الحرس الثوري قد نفذ هجمات إرهابية من هذه البؤر الاستيطانية الضخمة، إيران لم تقم بمقاومة قوية حتى الآن، يبدو جيشهم لينًا وأنثويًا. https://t.co/UvNULpL5fE	everyone	1	2019-08-30 14:19:51	ننقل هنا أخبار وتفاصيل الحروب من الأطراف المتنازعة، نناقش، نحلل، ونعرض جميع (الرؤى) أبحاثنا في قائمة المفضلة، الحساب البديل: @RoaaStudy	[]	[]	[]		FALSE	372046	1544	45306	644	94	FALSE	269	طالبان: تدمير ما مجموعه 18 منشأة حدودية إيرانية كان الحرس الثوري قد نفذ هجمات إرهابية من هذه البؤر الاستيطانية الضخمة، إيران لم تقم بمقاومة قوية حتى الآن، يبدو جيشهم لينًا وأنثويًا.	183	{}	{}	0	1	[]	0
1649743550685257729	FALSE	610	41	1985	37	28	258144	1167441727977902080	ar	[]	[]	[]	[]	['https://twitter.com/Roaastudies/status/1649743550685257729/video/1']	[]	[]	[]	[]	[]	[]	TRUE	[]	2023-04-22 11:54:47	TRUE	إعلام روسي: تواصل الشرطة الفرنسية تدريب السكان المحليين على أساسيات الحرية والديمقراطية التي كانوا يتشدقون بها لعقود. https://t.co/4ZVR9unfZm	everyone	1	2019-08-30 14:19:51	ننقل هنا أخبار وتفاصيل الحروب من الأطراف المتنازعة، نناقش، نحلل، ونعرض جميع (الرؤى) أبحاثنا في قائمة المفضلة، الحساب البديل: @RoaaStudy	[]	[]	[]		FALSE	372046	1544	45306	644	94	FALSE	351	إعلام روسي: تواصل الشرطة الفرنسية تدريب السكان المحليين على أساسيات الحرية والديمقراطية التي كانوا يتشدقون بها لعقود.	119	{}	{}	0	0	[]	0
1641062777593659394	FALSE	215	78	767	35	25	128884	1167441727977902080	ar	[]	[]	[]	[]	['https://twitter.com/Roaastudies/status/1641062777593659394/video/1']	[]	[]	[]	[]	[]	[]	TRUE	[]	2023-03-29 13:00:30	TRUE	مواجهة بين رجال الشرطة ورجال الإطفاء الفرنسيين https://t.co/v5JzojwnVJ	everyone	1	2019-08-30 14:19:51	ننقل هنا أخبار وتفاصيل الحروب من الأطراف المتنازعة، نناقش، نحلل، ونعرض جميع (الرؤى) أبحاثنا في قائمة المفضلة، الحساب البديل: @RoaaStudy	[]	[]	[]		FALSE	372046	1544	45306	644	94	FALSE	406	مواجهة بين رجال الشرطة ورجال الإطفاء الفرنسيين	47	{}	{}	0	0	[]	0
1635667754471571459	FALSE	8	2	58	1	3	17560	1167441727977902080	ar	['الطائف', 'السعودية']	['Place', 'Place']	[]	[]	['https://twitter.com/Roaastudies/status/1635667754471571459/video/1', 'https://twitter.com/Roaastudies/status/1635667754471571459/video/1']	[]	[]	[]	[]	[]	[]	TRUE	[]	2023-03-14 15:42:36	TRUE	إعصار يضرب مدينة الطائف في السعودية أمس ويتسبب بأضرار مادية. https://t.co/cnB117PelQ	everyone	0	2019-08-30 14:19:51	ننقل هنا أخبار وتفاصيل الحروب من الأطراف المتنازعة، نناقش، نحلل، ونعرض جميع (الرؤى) أبحاثنا في قائمة المفضلة، الحساب البديل: @RoaaStudy	[]	[]	[]		FALSE	372046	1544	45306	644	94	FALSE	427	إعصار يضرب مدينة الطائف في السعودية أمس ويتسبب بأضرار مادية.	61	{}	{}	0	2	[]	0
1628630299885154304	FALSE	25	6	178	1	2	34162	1167441727977902080	ar	[]	[]	[]	[]	['https://twitter.com/Roaastudies/status/1628630299885154304/video/1']	[]	[]	[]	[]	[]	[]	TRUE	[]	2023-02-23 05:38:16	TRUE	كاميرات المراقبة في مطار طاجيكستان تظهر لحظة وقوع الزلزال بقوة 7.3 الذي ضرب المنطقة الحدودية بين شينجيانغ وطاجيكستان صباح اليوم. https://t.co/xEOnwG3hp3	everyone	1	2019-08-30 14:19:51	ننقل هنا أخبار وتفاصيل الحروب من الأطراف المتنازعة، نناقش، نحلل، ونعرض جميع (الرؤى) أبحاثنا في قائمة المفضلة، الحساب البديل: @RoaaStudy	[]	[]	[]		FALSE	372046	1544	45306	644	94	FALSE	460	كاميرات المراقبة في مطار طاجيكستان تظهر لحظة وقوع الزلزال بقوة 7.3 الذي ضرب المنطقة الحدودية بين شينجيانغ وطاجيكستان صباح اليوم.	129	{}	{}	0	0	[]	0
1617794756385591299	FALSE	35	63	229	17	39	257004	1167441727977902080	ar	['كييف']	['Place']	[]	[]	['https://twitter.com/Roaastudies/status/1617794756385591299/video/1', 'https://twitter.com/Roaastudies/status/1617794756385591299/video/1']	[]	[]	[]	[]	[]	[]	TRUE	[]	2023-01-24 08:01:41	TRUE	أسراب ضخمة من الغربان تغزو العاصمة الأوكرانية كييف... https://t.co/equKoPQb4j	everyone	1	2019-08-30 14:19:51	ننقل هنا أخبار وتفاصيل الحروب من الأطراف المتنازعة، نناقش، نحلل، ونعرض جميع (الرؤى) أبحاثنا في قائمة المفضلة، الحساب البديل: @RoaaStudy	[]	[]	[]		FALSE	372046	1544	45306	644	94	FALSE	541	أسراب ضخمة من الغربان تغزو العاصمة الأوكرانية كييف...	54	{}	{}	0	1	[]	0
1611370259927236609	FALSE	7	4	87	0	3	13281	1167441727977902080	ar	['العراق', 'سامراء']	['Place', 'Place']	[]	[]	['https://twitter.com/Roaastudies/status/1611370259927236609/photo/1']	[]	[]	[]	[]	[]	[]	TRUE	[]	2023-01-06 14:33:02	TRUE	عائلة عراقية تأكل أوراق البلوط أثناء المجاعة. العراق - سامراء - 1917. https://t.co/iCox3Ler4d	everyone	1	2019-08-30 14:19:51	ننقل هنا أخبار وتفاصيل الحروب من الأطراف المتنازعة، نناقش، نحلل، ونعرض جميع (الرؤى) أبحاثنا في قائمة المفضلة، الحساب البديل: @RoaaStudy	[]	[]	[]		FALSE	372046	1544	45306	644	94	FALSE	578	عائلة عراقية تأكل أوراق البلوط أثناء المجاعة. العراق سامراء 1917.	71	{}	{}	0	2	[]	0
1580192809247596549	FALSE	26	10	141	0	3	0	1167441727977902080	ar	[]	[]	[]	[]	['https://twitter.com/RoaaMediaNews/status/1580192809247596549/video/1']	[]	[]	[]	[]	[]	[]	TRUE	[]	2022-10-12 13:44:58	TRUE	🚨الغواصات الروسية في طريقها للابحار عبر المحيط الهادئ. https://t.co/y0DvdtNqMu	everyone	1	2019-08-30 14:19:51	ننقل هنا أخبار وتفاصيل الحروب من الأطراف المتنازعة، نناقش، نحلل، ونعرض جميع (الرؤى) أبحاثنا في قائمة المفضلة، الحساب البديل: @RoaaStudy	[]	[]	[]		FALSE	372046	1544	45306	644	94	FALSE	721	الغواصات الروسية في طريقها للابحار عبر المحيط الهادئ.	54	{'🚨': 'police car light'}	{'🚨': 1}	1	0	[]	0
1565028678253400067	FALSE	5	2	30	0	0	0	1167441727977902080	ar	['السعودية']	['Place']	[]	[]	['https://twitter.com/RoaaMediaNews/status/1565028678253400067/photo/1']	[]	[]	[]	[]	[]	[]	TRUE	[]	2022-08-31 17:28:08	TRUE	47 مليون حبة إمفيتامين... السعودية تحبط تهريب أكبر كمية من المخدرات في عملية واحدة إلى المملكة. https://t.co/UzvDGtQRpE	everyone	0	2019-08-30 14:19:51	ننقل هنا أخبار وتفاصيل الحروب من الأطراف المتنازعة، نناقش، نحلل، ونعرض جميع (الرؤى) أبحاثنا في قائمة المفضلة، الحساب البديل: @RoaaStudy	[]	[]	[]		FALSE	372046	1544	45306	644	94	FALSE	809	47 مليون حبة إمفيتامين... السعودية تحبط تهريب أكبر كمية من المخدرات في عملية واحدة إلى المملكة.	96	{}	{}	0	1	[]	0
1509756933208961030	FALSE	0	2	20	0	0	0	1167441727977902080	ar	[]	[]	[]	[]	['https://twitter.com/RoaaMediaNews/status/1509756933208961030/video/1']	[]	[]	[]	[]	[]	[]	TRUE	[]	2022-04-01 04:57:57	TRUE	بيلغورد الروسية https://t.co/57zD3R4lu7	everyone	0	2019-08-30 14:19:51	ننقل هنا أخبار وتفاصيل الحروب من الأطراف المتنازعة، نناقش، نحلل، ونعرض جميع (الرؤى) أبحاثنا في قائمة المفضلة، الحساب البديل: @RoaaStudy	[]	[]	[]		FALSE	372046	1544	45306	644	94	FALSE	832	بيلغورد الروسية	16	{}	{}	0	0	[]	0
1687611897648975872	FALSE	0	1	1	0	0	1414	1419469995705262080	ar	[]	[]	['الكويت', 'عين_الحلوة', 'نصرالله', 'مرفأ_بيروت', 'البدون_مواطنون_وليسوا_رعايا', 'فاغنر']	[]	['https://twitter.com/nasernaser2244/status/1687611897648975872/video/1']	[]	[]	[]	[]	[]	[]	TRUE	[]	2023-08-04 23:50:05	TRUE	🛑 عراقيون يمزقون علم #الكويت والقادم يحمل مفاجأت غير سارة #عين_الحلوة #نصرالله #مرفأ_بيروت #البدون_مواطنون_وليسوا_رعايا #فاغنر https://t.co/XO7GOgvcpN	everyone	1	2021-07-26 01:30:10		[]	[]	[]		FALSE	422	239	6712	2	5982	FALSE	81	عراقيون يمزقون علم الكويت والقادم يحمل مفاجأت غير سارة عين الحلوة نصرالله مرفأ بيروت البدون مواطنون وليسوا رعايا فاغنر	121	{'🛑': 'stop sign'}	{'🛑': 1}	1	0	[]	0
1673077697793105920	FALSE	0	0	1	0	0	392	1419469995705262080	ar	['وليد الركراكي']	['Person']	[]	[]	['https://twitter.com/nasernaser2244/status/1673077697793105920/video/1']	[]	[]	[]	[]	[]	[]	TRUE	[]	2023-06-25 21:16:22	TRUE	🛑 المدرب وليد الركراكي يشارك جمهور الجيش الملكي فرحة الفوز بالبطولة الوطنية المغربية https://t.co/jPs0vhol6g	everyone	1	2021-07-26 01:30:10		[]	[]	[]		FALSE	422	239	6712	2	5982	FALSE	171	المدرب وليد الركراكي يشارك جمهور الجيش الملكي فرحة الفوز بالبطولة الوطنية المغربية	84	{'🛑': 'stop sign'}	{'🛑': 1}	1	1	[]	0
1674406034889142272	FALSE	1	0	4	0	1	664	1419469995705262080	ar	['السويد']	['Place']	[]	[]	['https://twitter.com/nasernaser2244/status/1674406034889142272/video/1']	[]	[]	[]	[]	[]	[]	TRUE	[]	2023-06-29 13:14:42	TRUE	🛑 في تعبير رمزي مواطن افغاني يقوم بتفجير علم دولة السويد https://t.co/RIIqn1bgIl	everyone	1	2021-07-26 01:30:10		[]	[]	[]		FALSE	422	239	6712	2	5982	FALSE	165	في تعبير رمزي مواطن افغاني يقوم بتفجير علم دولة السويد	56	{'🛑': 'stop sign'}	{'🛑': 1}	1	1	[]	0
1674177199295938560	FALSE	3	43	41	2	8	97270	1419469995705262080	ar	['السعودية', 'السعودية', 'جدة']	['Place', 'Place', 'Place']	[]	[]	['https://twitter.com/nasernaser2244/status/1674177199295938560/video/1']	[]	[]	[]	[]	[]	[]	TRUE	[]	2023-06-28 22:05:23	TRUE	🛑 تحديث ملخص الحادث الامني في السعودية تمكنت قوات الامن السعودية بكل مهنية واحترافية من قتل مهاجم القنصلية الامريكية في جدة دون الحاق اي ضرر جسدي او معنوي او نفسي به https://t.co/kEt9vglbTK	everyone	1	2021-07-26 01:30:10		[]	[]	[]		FALSE	422	239	6712	2	5982	FALSE	167	تحديث ملخص الحادث الامني في السعودية تمكنت قوات الامن السعودية بكل مهنية واحترافية من قتل مهاجم القنصلية الامريكية في جدة دون الحاق اي ضرر جسدي او معنوي او نفسي به	165	{'🛑': 'stop sign'}	{'🛑': 1}	1	3	[]	0
1667913481721397250	FALSE	0	1	2	0	0	4012	1419469995705262080	ar	['قطر']	['Place']	[]	[]	['https://twitter.com/nasernaser2244/status/1667913481721397250/video/1']	[]	[]	[]	[]	[]	[]	TRUE	[]	2023-06-11 15:15:37	TRUE	🛑 الاعلام الرسمي المصري: القرش الذي التهم السائح الروسي ع شواطى الغردقة جاء من دولة قطر بعد تدريبه وتجنيده https://t.co/F3sX1UkTAO	everyone	1	2021-07-26 01:30:10		[]	[]	[]		FALSE	422	239	6712	2	5982	FALSE	222	الاعلام الرسمي المصري: القرش الذي التهم السائح الروسي ع شواطى الغردقة جاء من دولة قطر بعد تدريبه وتجنيده	106	{'🛑': 'stop sign'}	{'🛑': 1}	1	1	[]	0
1645150333503512578	FALSE	0	0	1	0	0	148	1419469995705262080	ar	['السعودية']	['Place']	[]	[]	['https://twitter.com/nasernaser2244/status/1645150333503512578/photo/1']	[]	[]	[]	[]	[]	[]	TRUE	[]	2023-04-09 19:42:59	TRUE	🛑 ازالة اسم اية الله نمر النمر من الشارع الذي تتواحد فيه قنصلية السعودية في مشهد الايرانية في السياسة وحسابات المصالح الوطنية لا توجد محرمات او مقدسات كل شي مباح https://t.co/aVtHuVqgqY	everyone	1	2021-07-26 01:30:10		[]	[]	[]		FALSE	422	239	6712	2	5982	FALSE	377	ازالة اسم اية الله نمر النمر من الشارع الذي تتواحد فيه قنصلية السعودية في مشهد الايرانية في السياسة وحسابات المصالح الوطنية لا توجد محرمات او مقدسات كل شي مباح	162	{'🛑': 'stop sign'}	{'🛑': 1}	1	1	[]	0
1686550657606594560	FALSE	819	1046	5278	86	58	739359	1441558189984521984	ar	['علي يرلي كايا']	['Person']	['تركيا']	[]	['https://twitter.com/sarahArdogn/status/1686550657606594560/video/1']	[]	[]	[]	[]	[]	[]	TRUE	[]	2023-08-02 01:33:06	FALSE	#تركيا وزير الداخلية علي يرلي كايا يعلن إلقاء القبض على جميع الجناة المتورطين في جريمة أسنيورت بإسطنبول والتي وقعت ضد شقيقين يمنيين https://t.co/iEW2NhfIuT	everyone	1	2021-09-25 00:20:48	إعلامية تركية خريجة صحافة وإعلام.. تركيا الحديثة اولا	[]	[]	[]	تركيا	FALSE	137673	94	4643	71	2081	FALSE	83	تركيا وزير الداخلية علي يرلي كايا يعلن إلقاء القبض على جميع الجناة المتورطين في جريمة أسنيورت بإسطنبول والتي وقعت ضد شقيقين يمنيين	131	{}	{}	0	1	[]	0
1665716121746505729	FALSE	1555	2966	26213	301	111	4608106	1441558189984521984	ar	[]	[]	['البيت_الحرام', 'لجندي_المصري', 'محمد_صلاح']	[]	['https://twitter.com/sarahArdogn/status/1665716121746505729/photo/1', 'https://twitter.com/sarahArdogn/status/1665716121746505729/photo/1']	[]	[]	['Business Taxonomy', 'Person', 'Athlete', 'Unified Twitter Taxonomy', 'Unified Twitter Taxonomy', 'Unified Twitter Taxonomy']	['Categories within Brand Verticals that narrow down the scope of Brands', 'Named people in the world like Nelson Mandela', 'An athlete in the world, like Serena Williams or Lionel Messi', 'A taxonomy of user interests. ', 'A taxonomy of user interests. ', 'A taxonomy of user interests. ']	['Sports & Fitness Business', 'Mohamed Salah', 'Mohamed Salah', 'Soccer', 'Mohamed Salah', 'Sports']	['Brands, companies, advertisers and every non-person handle with the profit intent related to sports nutrition, athletic apparel, sports apps, fitness venues', '', '', '', '', 'Sports']	TRUE	[]	2023-06-05 13:44:05	FALSE	أنا فتاة تركية 🇹🇷 وفلسطين قضيتي.. وكل عربي أخي وقطعة من قلبي ❤.. اليوم قمت بعمرة بـ #البيت_الحرام عن #لجندي_المصري الشهيد #محمد_صلاح الذي قتل 3 جند صهاينة🇵🇸🇸🇦🇪🇬 ارجو من كل عربي مسلم الدعاء له ووضع قلب ❤لنغيظ بها بني صهيوون.. ارجو من كل مسلم يسجل حظورة https://t.co/3xftmBFqfi	everyone	1	2021-09-25 00:20:48	إعلامية تركية خريجة صحافة وإعلام.. تركيا الحديثة اولا	[]	[]	[]	تركيا	FALSE	137673	94	4643	71	2081	FALSE	235	أنا فتاة تركية وفلسطين قضيتي.. وكل عربي أخي وقطعة من قلبي .. اليوم قمت بعمرة بـ البيت الحرام عن لجندي المصري الشهيد محمد صلاح الذي قتل 3 جند صهاينة ارجو من كل عربي مسلم الدعاء له ووضع قلب لنغيظ بها بني صهيوون.. ارجو من كل مسلم يسجل حظورة	243	{'❤': 'red heart', '🇹🇷': 'flag: Turkey', '🇪🇬': 'flag: Egypt', '🇵🇸': 'flag: Palestinian Territories', '🇸🇦': 'flag: Saudi Arabia'}	{'❤': 2, '🇹🇷': 1, '🇪🇬': 1, '🇵🇸': 1, '🇸🇦': 1}	6	0	[]	0
1646273479602233346	FALSE	8	4	118	0	0	6634	1441558189984521984	ar	['', 'فان بيرسي']	['Person', 'Person']	['ليلة_21', 'ليلة_القدر', 'ريال_مدريد_تشيلسي']	[]	['https://twitter.com/sarahArdogan/status/1646273479602233346/photo/1']	[]	[]	[]	[]	[]	[]	TRUE	[]	2023-04-12 22:05:58	TRUE	🚨|| عااااااجل 🎙️- فان بيرسي : وجدت الإسلام يؤمن حياتي ويُبعد عني الماضي الأليم, الروبن فإن بيرسي يُعلن إسلامه . اللهم أعز الإسلام والمسلمين ❤️ #ليلة_21 #ليلة_القدر #ريال_مدريد_تشيلسي https://t.co/TmJmXhZUiD	everyone	1	2021-09-25 00:20:48	إعلامية تركية خريجة صحافة وإعلام.. تركيا الحديثة اولا	[]	[]	[]	تركيا	FALSE	137673	94	4643	71	2081	FALSE	375	عااااااجل فان بيرسي : وجدت الإسلام يؤمن حياتي ويُبعد عني الماضي الأليم الروبن فإن بيرسي يُعلن إسلامه . اللهم أعز الإسلام والمسلمين ليلة 21 ليلة القدر ريال مدريد تشيلسي	175	{'🎙️': 'studio microphone', '❤️': 'red heart', '🚨': 'police car light'}	{'🎙️': 1, '❤️': 1, '🚨': 1}	3	2	[]	0
1609341316474834946	FALSE	4	5	68	1	0	4826	1441558189984521984	ar	[]	[]	['كريستيانو_رونالدو', 'النصر_الخليج', 'السنه_الجديدة_2023']	[]	['https://twitter.com/alisa_aimanol/status/1609341316474834946/photo/1']	[]	[]	['Person', 'Business Taxonomy', 'Athlete', 'Unified Twitter Taxonomy', 'Unified Twitter Taxonomy', 'Unified Twitter Taxonomy']	['Named people in the world like Nelson Mandela', 'Categories within Brand Verticals that narrow down the scope of Brands', 'An athlete in the world, like Serena Williams or Lionel Messi', 'A taxonomy of user interests. ', 'A taxonomy of user interests. ', 'A taxonomy of user interests. ']	['Cristiano Ronaldo', 'Sports & Fitness Business', 'Cristiano Ronaldo', 'Soccer', 'Cristiano Ronaldo', 'Sports']	['', 'Brands, companies, advertisers and every non-person handle with the profit intent related to sports nutrition, athletic apparel, sports apps, fitness venues', '', '', '', 'Sports']	TRUE	[]	2023-01-01 00:10:44	TRUE	#كريستيانو_رونالدو : نعم اخترتُ بلاد العرب لأني احبهم ، وأكثر جمهوري عربي دائماً ما كان معي هذا الجمهور ، انا اليوم معهم في النصر #النصر_الخليج #السنه_الجديدة_2023 https://t.co/39dT0Fnam4	everyone	1	2021-09-25 00:20:48	إعلامية تركية خريجة صحافة وإعلام.. تركيا الحديثة اولا	[]	[]	[]	تركيا	FALSE	137673	94	4643	71	2081	FALSE	593	كريستيانو رونالدو : نعم اخترتُ بلاد العرب لأني احبهم ، وأكثر جمهوري عربي دائماً ما كان معي هذا الجمهور ، انا اليوم معهم في النصر النصر الخليج السنه الجديدة 2023	162	{}	{}	0	0	[]	0
1686834602474627073	FALSE	1	1	7	0	0	1315	1315631150883320064	ar	[]	[]	['اشتباكات', 'عين_الحلوة', 'جنوب_لبنان', 'صيدا', 'جسور']	[]	['https://twitter.com/JusurArabia/status/1686834602474627073/video/1']	[]	[]	['Unified Twitter Taxonomy', 'Unified Twitter Taxonomy', 'Unified Twitter Taxonomy']	['A taxonomy of user interests. ', 'A taxonomy of user interests. ', 'A taxonomy of user interests. ']	['Politics', 'Political issues', 'Lebanon Conflict ']	['Politics', 'Political issues', '']	TRUE	[]	2023-08-02 20:21:23	TRUE	#اشتباكات عنيفة في مخيم #عين_الحلوة #جنوب_لبنان #صيدا #جسور https://t.co/ZkrzAZUWgA	everyone	1	2020-10-12 12:31:32	جسور | منصة عربية تعمل على مدار الساعة لتغطية أخبار المنطقة العربية والعالم	[]	[]	[]	Lebanon	FALSE	11818	9	32990	19	359	FALSE	85	اشتباكات عنيفة في مخيم عين الحلوة جنوب لبنان صيدا جسور	56	{}	{}	0	0	[]	0
1681333011256864768	FALSE	0	0	1	0	0	176	1315631150883320064	ar	['الصين']	['Place']	['جسور', 'الصين', 'إعصار']	[]	['https://jusur.com', 'https://twitter.com/JusurArabia/status/1681333011256864768/video/1']	[]	[]	['Business Taxonomy', 'Unified Twitter Taxonomy']	['Categories within Brand Verticals that narrow down the scope of Brands', 'A taxonomy of user interests. ']	['Gaming Business', 'News']	['Brands, companies, advertisers and every non-person handle with the profit intent related to offline and online games such as gaming consoles, tabletop games, video game publishers', 'News']	TRUE	[]	2023-07-18 16:00:02	TRUE	نزوح كثيف من جنوبي الصين بعد إعصار قوي هز البلاد! #جسور #الصين #إعصار يمكنكم متابعة آخر الأخبار على موقعنا: https://t.co/ewP1yTJSo2 https://t.co/9OE3Ly6yVj	everyone	1	2020-10-12 12:31:32	جسور | منصة عربية تعمل على مدار الساعة لتغطية أخبار المنطقة العربية والعالم	[]	[]	[]	Lebanon	FALSE	11818	9	32990	19	359	FALSE	126	نزوح كثيف من جنوبي الصين بعد إعصار قوي هز البلاد جسور الصين إعصار يمكنكم متابعة آخر الأخبار على موقعنا:	106	{}	{}	0	1	[]	0
1636313565677199360	FALSE	0	0	0	0	0	250	1315631150883320064	ar	['تركيا']	['Place']	['جسور', 'تركيا', 'زلزال_تركيا', 'فيضانات', 'غازي_عنتاب', 'كهرمان_مرعش']	[]	['https://www.jusur.com/', 'https://twitter.com/JusurArabia/status/1636313565677199360/video/1']	[]	[]	['Unified Twitter Taxonomy']	['A taxonomy of user interests. ']	['News']	['News']	TRUE	[]	2023-03-16 10:28:49	TRUE	فيضانات تركيا.. ضحايا ومفقودون في أديامان وشانلي أورفا #جسور #تركيا #زلزال_تركيا #فيضانات #غازي_عنتاب #كهرمان_مرعش يمكنكم متابعة آخر الأخبار على موقعنا: https://t.co/qQB5YJ6hCd https://t.co/og77lsJ5IY	everyone	0	2020-10-12 12:31:32	جسور | منصة عربية تعمل على مدار الساعة لتغطية أخبار المنطقة العربية والعالم	[]	[]	[]	Lebanon	FALSE	11818	9	32990	19	359	FALSE	207	فيضانات تركيا.. ضحايا ومفقودون في أديامان وشانلي أورفا جسور تركيا زلزال تركيا فيضانات غازي عنتاب كهرمان مرعش يمكنكم متابعة آخر الأخبار على موقعنا:	148	{}	{}	0	1	[]	0
1578836385779576832	FALSE	0	0	3	0	0	0	1315631150883320064	ar	[]	[]	['ألمانيا', 'اوكرانيا_روسيا']	[]	[]	[]	[]	['Ongoing News Story']	["Ongoing News Stories like 'Brexit'"]	['Russo-Ukrainian conflict']	['']	TRUE	[]	2022-10-08 19:55:02	TRUE	#ألمانيا ترسل 100 دبابة قتالية إضافية للقوات المسلحة الأوكرانية من اليونان وسلوفاكيا. #اوكرانيا_روسيا	everyone	1	2020-10-12 12:31:32	جسور | منصة عربية تعمل على مدار الساعة لتغطية أخبار المنطقة العربية والعالم	[]	[]	[]	Lebanon	FALSE	11818	9	32990	19	359	FALSE	730	ألمانيا ترسل 100 دبابة قتالية إضافية للقوات المسلحة الأوكرانية من اليونان وسلوفاكيا. اوكرانيا روسيا	99	{}	{}	0	0	[]	0
1685707924759318529	FALSE	22	11	167	1	4	15126	1487210648748634112	ar	['حي ركن الدين الدمشقي']	['Place']	[]	[]	['https://twitter.com/heysem_bastin/status/1685707924759318529/video/1']	[]	[]	[]	[]	[]	[]	TRUE	[]	2023-07-30 17:44:22	TRUE	هل تعود الشام لتنتفض ضد المجرم الاسد ؟ أم انها ثورة الجياع ؟؟ شبيحة النظام تواجه مظاهرات خرجت في حي ركن الدين الدمشقي https://t.co/zHVuzPvzGD	everyone	1	2022-01-28 23:47:27	Ben ezelden beridir hür yaşadım, hür yaşarım. Hangi çılgın bana zincir vuracakmış? Şaşarım!	[]	[]	[]	#الشمال_السوري	FALSE	1320	1209	6837	5	87092	FALSE	88	هل تعود الشام لتنتفض ضد المجرم الاسد ؟ أم انها ثورة الجياع ؟؟ شبيحة النظام تواجه مظاهرات خرجت في حي ركن الدين الدمشقي	120	{}	{}	0	1	[]	0
1685709556851077120	FALSE	311	364	4954	109	53	1023187	336025782	ar	['رياض محرز', 'جدة']	['Person', 'Place']	[]	[]	['https://twitter.com/EPLworld/status/1685709556851077120/photo/1']	[]	[]	['Business Taxonomy', 'Brand', 'Person', 'Athlete', 'Unified Twitter Taxonomy', 'Unified Twitter Taxonomy', 'Unified Twitter Taxonomy']	['Categories within Brand Verticals that narrow down the scope of Brands', 'Brands and Companies', 'Named people in the world like Nelson Mandela', 'An athlete in the world, like Serena Williams or Lionel Messi', 'A taxonomy of user interests. ', 'A taxonomy of user interests. ', 'A taxonomy of user interests. ']	['Sports & Fitness Business', 'EPL World', 'Riyad Mahrez', 'Riyad Mahrez', 'Soccer', 'Riyad Mahrez', 'Sports']	['Brands, companies, advertisers and every non-person handle with the profit intent related to sports nutrition, athletic apparel, sports apps, fitness venues', '', '', '', '', '', 'Sports']	TRUE	[]	2023-07-30 17:50:51	TRUE	رياض محرز: "كوني لاعب مسلم هو سبب رئيسي وراء انضمامي لأهلي جدة، اردت العيش في بلد مسلمة." https://t.co/5W1QX9uMFG	everyone	1	2011-07-15 16:40:54	• أكبر موقع عربي مختص بالكرة الانجليزية و الاوروبية و العالمية • للتواصل eplworld@eplworld.net •	[]	[]	[]	United Arab Emirates	FALSE	3391258	581	213610	4576	1196	FALSE	86	رياض محرز: كوني لاعب مسلم هو سبب رئيسي وراء انضمامي لأهلي جدة، اردت العيش في بلد مسلمة.	89	{}	{}	0	2	[]	0
1699786054147190789	FALSE	27	19	1827	3	3	135557	336025782	ar	['محمد صلاح', 'ليفربول']	['Person', 'Organization']	[]	[]	['https://twitter.com/EPLworld/status/1699786054147190789/photo/1']	[]	[]	['Sports Event', 'Sport', 'Sports League', 'Sports League', 'Events [Entity Service]', 'Soccer Match', 'Business Taxonomy', 'Brand', 'Unified Twitter Taxonomy', 'Unified Twitter Taxonomy', 'Person', 'Sport', 'Sports Team', 'Athlete', 'Unified Twitter Taxonomy', 'Unified Twitter Taxonomy', 'Unified Twitter Taxonomy', 'Unified Twitter Taxonomy']	['', 'Types of sports, like soccer and basketball', '', '', 'Real world events. ', 'Sports Event specific to Soccer matches', 'Categories within Brand Verticals that narrow down the scope of Brands', 'Brands and Companies', 'A taxonomy of user interests. ', 'A taxonomy of user interests. ', 'Named people in the world like Nelson Mandela', 'Types of sports, like soccer and basketball', 'A sports t…	['Egypt vs Russia', 'Soccer', 'International - Soccer', 'Int. Friendly Games', 'Egypt vs Russia', 'Egypt vs Russia', 'Sports & Fitness Business', 'EPL World', 'Soccer', 'Sports', 'Mohamed Salah', 'Soccer', 'Liverpool FC', 'Mohamed Salah', 'Liverpool FC', 'Soccer', 'Mohamed Salah', 'Sports']	['', '', '', '', '', '', 'Brands, companies, advertisers and every non-person handle with the profit intent related to sports nutrition, athletic apparel, sports apps, fitness venues', '', '', 'Sports', '', '', '', '', '', '', '', 'Sports']	TRUE	[]	2023-09-07 14:05:50	TRUE	🚨🔴 حتى هذه اللحظة، محمد صلاح باقٍ في ليفربول https://t.co/ZV95k8Azya	everyone	0	2011-07-15 16:40:54	• أكبر موقع عربي مختص بالكرة الانجليزية و الاوروبية و العالمية • للتواصل eplworld@eplworld.net •	[]	[]	[]	United Arab Emirates	FALSE	3391258	581	213610	4576	1196	FALSE	3	حتى هذه اللحظة، محمد صلاح باقٍ في ليفربول	44	{'🚨': 'police car light', '🔴': 'red circle'}	{'🚨': 1, '🔴': 1}	2	2	['ليفربول']	1
1690449726670319616	FALSE	40	53	620	23	18	182498	336025782	ar	['محمد صلاح', 'محمد صلاح']	['Person', 'Person']	[]	['OLYAN15K']	['https://twitter.com/OLYAN15K/status/1690440154094108673/video/1']	[]	[]	['Person', 'Business Taxonomy', 'Brand', 'Athlete', 'Unified Twitter Taxonomy', 'Unified Twitter Taxonomy', 'Unified Twitter Taxonomy', 'Person', 'Athlete', 'Unified Twitter Taxonomy', 'Unified Twitter Taxonomy', 'Unified Twitter Taxonomy']	['Named people in the world like Nelson Mandela', 'Categories within Brand Verticals that narrow down the scope of Brands', 'Brands and Companies', 'An athlete in the world, like Serena Williams or Lionel Messi', 'A taxonomy of user interests. ', 'A taxonomy of user interests. ', 'A taxonomy of user interests. ', 'Named people in the world like Nelson Mandela', 'An athlete in the world, like Sere…	['Sadio Mane', 'Sports & Fitness Business', 'EPL World', 'Sadio Mane', 'Soccer', 'Sadio Mane', 'Sports', 'Mohamed Salah', 'Mohamed Salah', 'Soccer', 'Mohamed Salah', 'Sports']	['', 'Brands, companies, advertisers and every non-person handle with the profit intent related to sports nutrition, athletic apparel, sports apps, fitness venues', '', '', '', '', 'Sports', '', '', '', '', 'Sports']	TRUE	[]	2023-08-12 19:46:36	TRUE	أحد المشجعين مع ساديو ماني عن محمد صلاح: ” محمد صلاح ليس لديه لقب أفريقي (يضحك) “👀🇪🇬 - @OLYAN15K https://t.co/qfOkghDK6y	everyone	0	2011-07-15 16:40:54	• أكبر موقع عربي مختص بالكرة الانجليزية و الاوروبية و العالمية • للتواصل eplworld@eplworld.net •	[]	[]	[]	United Arab Emirates	FALSE	3391258	581	213610	4576	1196	FALSE	75	أحد المشجعين مع ساديو ماني عن محمد صلاح: محمد صلاح ليس لديه لقب أفريقي يضحك 15	87	{'👀': 'eyes', '🇪🇬': 'flag: Egypt'}	{'👀': 1, '🇪🇬': 1}	2	2	[]	0
1628875916477714432	FALSE	24	37	515	13	3	92929	336025782	ar	['برشلونة']	['Organization']	[]	[]	['https://twitter.com/EPLworld/status/1628875916477714432/photo/1']	[]	[]	['TV Shows', 'Sports Event', 'Sport', 'Sports Team', 'Sports League', 'Sports League', 'Events [Entity Service]', 'Soccer Match', 'Business Taxonomy', 'Brand', 'Unified Twitter Taxonomy', 'Unified Twitter Taxonomy', 'Unified Twitter Taxonomy', 'Unified Twitter Taxonomy', 'Events [Entity Service]']	['Television shows from around the world', '', 'Types of sports, like soccer and basketball', 'A sports team organization, like Arsenal and the Boston Celtics', '', '', 'Real world events. ', 'Sports Event specific to Soccer matches', 'Categories within Brand Verticals that narrow down the scope of Brands', 'Brands and Companies', 'A taxonomy of user interests. ', 'A taxonomy of user interests. '…	['UEFA Europa League Football', 'Manchester United vs FC Barcelona', 'Soccer', 'FC Barcelona', 'International Clubs - Soccer', 'UEFA Europa League', 'Manchester United vs FC Barcelona', 'Manchester United vs FC Barcelona', 'Sports & Fitness Business', 'EPL World', 'FC Barcelona', 'UEFA Europa League', 'Soccer', 'Sports', 'Messi durante su presentación con el PSG: “Tengo la ilusión de seguir ganan…	['Coverage from the UEFA Europa League, an annual competition for European football clubs.', '', '', '', '', '', '', '', 'Brands, companies, advertisers and every non-person handle with the profit intent related to sports nutrition, athletic apparel, sports apps, fitness venues', '', '', '', '', 'Sports', 'El PSG presentó de forma oficial a Messi en el Parque de los Príncipes, en París. Messi dij…	TRUE	[]	2023-02-23 21:54:16	TRUE	للموسم الثاني على التوالي برشلونة يودع من الدوري الاوروبي! https://t.co/cpm3Agh5W3	everyone	0	2011-07-15 16:40:54	• أكبر موقع عربي مختص بالكرة الانجليزية و الاوروبية و العالمية • للتواصل eplworld@eplworld.net •	[]	[]	[]	United Arab Emirates	FALSE	3391258	581	213610	4576	1196	FALSE	454	للموسم الثاني على التوالي برشلونة يودع من الدوري الاوروبي	58	{}	{}	0	1	['برشلونة']	1
1504746938088017927	FALSE	17	25	624	8	2	0	336025782	ar	['منصور بن محمد بن راشد آل مكتوم', 'مانشستر يونايتد', 'دبي']	['Person', 'Organization', 'Place']	[]	[]	['https://twitter.com/EPLworld/status/1504746938088017927/photo/1']	[]	[]	['Person', 'Politician', 'Brand', 'Unified Twitter Taxonomy', 'Unified Twitter Taxonomy', 'Unified Twitter Taxonomy', 'Sports Team', 'Unified Twitter Taxonomy', 'Unified Twitter Taxonomy', 'Unified Twitter Taxonomy', 'Cities']	['Named people in the world like Nelson Mandela', 'Politicians in the world, like Joe Biden', 'Brands and Companies', 'A taxonomy of user interests. ', 'A taxonomy of user interests. ', 'A taxonomy of user interests. ', 'A sports team organization, like Arsenal and the Boston Celtics', 'A taxonomy of user interests. ', 'A taxonomy of user interests. ', 'A taxonomy of user interests. ', 'Cities ar…	['Mohammed bin Rashid Al Maktoum', 'Mohammed bin Rashid Al Maktoum', 'EPL World', 'Politics', 'Political figures', 'Mohammed bin Rashid Al Maktoum', 'Manchester United', 'Manchester United', 'Soccer', 'Sports', 'Manchester']	['Mohammed bin Rashid Al Maktoum ( محمد بن راشد أل مكتوم)\nVice President and Prime Minister of the United Arab Emirates, and Ruler of the Emirate of Dubai', 'Mohammed bin Rashid Al Maktoum ( محمد بن راشد أل مكتوم)\nVice President and Prime Minister of the United Arab Emirates, and Ruler of the Emirate of Dubai', '', 'Politics', 'Politician', 'Mohammed bin Rashid Al Maktoum ( محمد بن راشد أل مكتو…	TRUE	[]	2022-03-18 09:10:01	TRUE	الشيخ منصور بن محمد بن راشد آل مكتوم خلال إجتماعه مع افرام غليزر احد مُلاك مانشستر يونايتد في دبي 🇦🇪 https://t.co/xODlkbPO2s	everyone	0	2011-07-15 16:40:54	• أكبر موقع عربي مختص بالكرة الانجليزية و الاوروبية و العالمية • للتواصل eplworld@eplworld.net •	[]	[]	[]	United Arab Emirates	FALSE	3391258	581	213610	4576	1196	FALSE	567	الشيخ منصور بن محمد بن راشد آل مكتوم خلال إجتماعه مع افرام غليزر احد مُلاك مانشستر يونايتد في دبي	99	{'🇦🇪': 'flag: United Arab Emirates'}	{'🇦🇪': 1}	1	3	['مانشستر يونايتد']	1
1593231169075970050	FALSE	6	2	166	2	0	0	336025782	ar	['ميسي']	['Person']	['كأس_العالم_قطر_2022']	[]	['https://twitter.com/EPLworld/status/1593231169075970050/photo/1']	[]	[]	['Person', 'Business Taxonomy', 'Brand', 'Athlete', 'Unified Twitter Taxonomy', 'Unified Twitter Taxonomy', 'Unified Twitter Taxonomy', 'Events [Entity Service]', 'Events [Entity Service]', 'Events [Entity Service]']	['Named people in the world like Nelson Mandela', 'Categories within Brand Verticals that narrow down the scope of Brands', 'Brands and Companies', 'An athlete in the world, like Serena Williams or Lionel Messi', 'A taxonomy of user interests. ', 'A taxonomy of user interests. ', 'A taxonomy of user interests. ', 'Real world events. ', 'Real world events. ', 'Real world events. ']	['Lionel Messi', 'Sports & Fitness Business', 'EPL World', 'Lionel Messi', 'Soccer', 'Lionel Messi', 'Sports', 'El contrato de Messi terminó con el Barça y el futbolista es libre de negociar con el equipo que quiera', 'Messi durante su presentación con el PSG: “Tengo la ilusión de seguir ganando”', 'باريس سان جيرمان في مواجهة أولمبيك ليون في قمة الدوري الفرنسي']	['', 'Brands, companies, advertisers and every non-person handle with the profit intent related to sports nutrition, athletic apparel, sports apps, fitness venues', '', '', '', '', 'Sports', 'Medios reportan que el club blaugrana espera firmar un nuevo contrato con el jugador argentino en los próximos días.\n\nSigue aquí toda la conversación con Tweets de periodistas y medios deportivos. 👇🏼\n\n',…	TRUE	[]	2022-11-17 13:14:46	TRUE	🇦🇷 من وصول ليونل ميسي عبر طائرة فلاي دبي للدوحة للمشاركة في المونديال الاخير له في مسيرته #كأس_العالم_قطر_2022 https://t.co/8WYRucorvE	everyone	0	2011-07-15 16:40:54	• أكبر موقع عربي مختص بالكرة الانجليزية و الاوروبية و العالمية • للتواصل eplworld@eplworld.net •	[]	[]	[]	United Arab Emirates	FALSE	3391258	581	213610	4576	1196	FALSE	655	من وصول ليونل ميسي عبر طائرة فلاي دبي للدوحة للمشاركة في المونديال الاخير له في مسيرته كأس العالم قطر 2022	112	{'🇦🇷': 'flag: Argentina'}	{'🇦🇷': 1}	1	1	[]	0
1591917684962521089	FALSE	20	15	398	11	5	0	336025782	ar	['كريستيانو رونالدو']	['Person']	[]	[]	['https://twitter.com/EPLworld/status/1591917684962521089/photo/1']	[]	[]	['Person', 'Business Taxonomy', 'Brand', 'Athlete', 'Unified Twitter Taxonomy', 'Unified Twitter Taxonomy', 'Unified Twitter Taxonomy']	['Named people in the world like Nelson Mandela', 'Categories within Brand Verticals that narrow down the scope of Brands', 'Brands and Companies', 'An athlete in the world, like Serena Williams or Lionel Messi', 'A taxonomy of user interests. ', 'A taxonomy of user interests. ', 'A taxonomy of user interests. ']	['Cristiano Ronaldo', 'Sports & Fitness Business', 'EPL World', 'Cristiano Ronaldo', 'Soccer', 'Cristiano Ronaldo', 'Sports']	['', 'Brands, companies, advertisers and every non-person handle with the profit intent related to sports nutrition, athletic apparel, sports apps, fitness venues', '', '', '', '', 'Sports']	TRUE	[]	2022-11-13 22:15:27	TRUE	كريستيانو رونالدو : "أنا أشعر بالخيانة" https://t.co/bLp96T8r8v	everyone	0	2011-07-15 16:40:54	• أكبر موقع عربي مختص بالكرة الانجليزية و الاوروبية و العالمية • للتواصل eplworld@eplworld.net •	[]	[]	[]	United Arab Emirates	FALSE	3391258	581	213610	4576	1196	FALSE	657	كريستيانو رونالدو : أنا أشعر بالخيانة	39	{}	{}	0	1	[]	0
1583141988110839808	FALSE	39	115	743	84	16	0	336025782	ar	['مانشستر يونايتد', 'كريستيانو رونالدو', 'تشيلسي']	['Organization', 'Person', 'Organization']	[]	[]	['https://twitter.com/EPLworld/status/1583141988110839808/photo/1']	[]	[]	['TV Shows', 'Sports Event', 'Sports Event', 'Person', 'Sport', 'Sports League', 'Sports League', 'Events [Entity Service]', 'Events [Entity Service]', 'Soccer Match', 'Soccer Match', 'Business Taxonomy', 'Brand', 'Athlete', 'Unified Twitter Taxonomy', 'Unified Twitter Taxonomy', 'Unified Twitter Taxonomy', 'Unified Twitter Taxonomy', 'Sports Team', 'Sports Team', 'Unified Twitter Taxonomy', 'Uni…	['Television shows from around the world', '', '', 'Named people in the world like Nelson Mandela', 'Types of sports, like soccer and basketball', '', '', 'Real world events. ', 'Real world events. ', 'Sports Event specific to Soccer matches', 'Sports Event specific to Soccer matches', 'Categories within Brand Verticals that narrow down the scope of Brands', 'Brands and Companies', 'An athlete in…	['Premier League', 'Brentford FC vs Chelsea FC', 'Manchester United vs Tottenham Hotspur', 'Cristiano Ronaldo', 'Soccer', 'England - Soccer', 'Premier League', 'Brentford FC vs Chelsea FC', 'Manchester United vs Tottenham Hotspur', 'Brentford FC vs Chelsea FC', 'Manchester United vs Tottenham Hotspur', 'Sports & Fitness Business', 'EPL World', 'Cristiano Ronaldo', 'Premier League', 'Soccer', 'Cri…	['', '', '', '', '', '', '', '', '', '', '', 'Brands, companies, advertisers and every non-person handle with the profit intent related to sports nutrition, athletic apparel, sports apps, fitness venues', '', '', '', '', '', 'Sports', '', '', '', '', '', 'Sports', 'Manchester', '']	TRUE	[]	2022-10-20 17:03:57	TRUE	بيان رسمي - مانشستر يونايتد: " تم استبعاد كريستيانو رونالدو من قائمة الفريق الأول التي ستلعب امام تشيلسي يوم السبت، بقية اللاعبين مركزين بالكامل على التحضير للمباراة القادمة " https://t.co/qaDVfyaKkg	everyone	0	2011-07-15 16:40:54	• أكبر موقع عربي مختص بالكرة الانجليزية و الاوروبية و العالمية • للتواصل eplworld@eplworld.net •	[]	[]	[]	United Arab Emirates	FALSE	3391258	581	213610	4576	1196	FALSE	704	بيان رسمي مانشستر يونايتد: تم استبعاد كريستيانو رونالدو من قائمة الفريق الأول التي ستلعب امام تشيلسي يوم السبت، بقية اللاعبين مركزين بالكامل على التحضير للمباراة القادمة	173	{}	{}	0	3	['مانشستر يونايتد', 'تشيلسي']	2
1686630328331280384	FALSE	8	10	52	0	0	7937	1326956804824329984	ar	['البصرة']	['Place']	['ام_قصر_عراقية']	[]	['https://twitter.com/tyersrubberfire/status/1686630328331280384/video/1']	[]	[]	[]	[]	[]	[]	TRUE	[]	2023-08-02 06:49:41	TRUE	#ام_قصر_عراقية احذروا اهل البصرة.... فانهم كالرصاص في جبين من يحاول ان يغتصب ارضهم https://t.co/rDhpVevCEY	everyone	1	2020-11-12 18:41:36	professional all things انا عراقية قبل كل شي فأصحابي لاشرقيون ولا غربيون حتما يزول اهل الباطل بالحق المبين. رابط قناتنا https://t.co/OGOIvGgYLn	['https://t.me/alsdr85']	[]	[]		FALSE	8401	6834	31706	1	33465	FALSE	87	ام قصر عراقية احذروا اهل البصرة.... فانهم كالرصاص في جبين من يحاول ان يغتصب ارضهم	82	{}	{}	0	1	[]	0
1686092459380527105	FALSE	1	2	3	0	0	1659	1342575652936032000	ar	['كندا']	['Place']	[]	[]	['https://twitter.com/wn3xwrCxiCRsiAn/status/1686092459380527105/video/1']	[]	[]	[]	[]	[]	[]	TRUE	[]	2023-07-31 19:12:23	TRUE	مسلح يقتحم مسجد في كندا و يعتدي على المصلين https://t.co/hx9uWH0Q82	everyone	1	2020-12-25 20:59:39	متقاعد من زمان ، 🇰🇼 كويتي مال أوّل ، 🇵🇸 عرباوي ، الحكومه ابخص مني و منك ، هذا حسابي الخامس ، ناقل الكفر ليس بكافر	['https://t.me/alsdr85']	[]	[]		FALSE	2238	4940	21851	0	14367	FALSE	94	مسلح يقتحم مسجد في كندا و يعتدي على المصلين	44	{}	{}	0	1	[]	0
1685716610147889152	FALSE	13	2	69	1	0	2634	1375687837186679040	ar	['حي ركن الدين بدمشق']	['Place']	[]	[]	['https://twitter.com/CrSyrians/status/1685716610147889152/video/1']	[]	[]	[]	[]	[]	[]	TRUE	[]	2023-07-30 18:18:53	TRUE	بالرصاص الحي عصابات الأسد تفرق مظاهرة خرجت في حي ركن الدين بدمشق https://t.co/RBt0K0kncl	everyone	1	2021-03-27 05:55:27	https://t.co/Bak94a6cX9	['http://t.me/crsyrian']	[]	[]		FALSE	5738	3	5682	13	60	FALSE	88	بالرصاص الحي عصابات الأسد تفرق مظاهرة خرجت في حي ركن الدين بدمشق	65	{}	{}	0	1	[]	0
1624762196684144641	FALSE	4	0	5	0	0	426	1375687837186679040	ar	[]	[]	['متداول', 'تركيا', 'زلزال', 'زلزال_سوريا_تركيا', 'زلزال_سوريا', 'زلزال_تركيا']	[]	['https://twitter.com/CrSyrians/status/1624762196684144641/video/1']	[]	[]	[]	[]	[]	[]	TRUE	[]	2023-02-12 13:27:48	TRUE	#متداول | قطة تطلب المساعدة من تحت الركام في #تركيا جراء الزلزال #زلزال #زلزال_سوريا_تركيا #زلزال_سوريا #زلزال_تركيا https://t.co/cOFfNP3iLy	everyone	1	2021-03-27 05:55:27	https://t.co/Bak94a6cX9	['http://t.me/crsyrian']	[]	[]		FALSE	5738	3	5682	13	60	FALSE	474	متداول قطة تطلب المساعدة من تحت الركام في تركيا جراء الزلزال زلزال زلزال سوريا تركيا زلزال سوريا زلزال تركيا	112	{}	{}	0	0	[]	0
1686078862063517717	FALSE	222	64	2555	23	24	100269	26471813	ar	[]	[]	[]	[]	['https://twitter.com/Konumma/status/1686078862063517717/video/1']	[]	[]	[]	[]	[]	[]	TRUE	[]	2023-07-31 18:18:21	TRUE	إحتفاء كبير برجوع رئيس بوركينا فاسو إلى بلده بعد القمة الروسية الأفريقية https://t.co/ycjwwVsVPo	everyone	1	2009-03-25 10:57:52	interested in philosophy, anthropology and geopolitics.	['http://t.me/crsyrian']	[]	[]	Limbo (The Edge of Hell)	FALSE	7846	152	7124	23	2957	FALSE	89	إحتفاء كبير برجوع رئيس بوركينا فاسو إلى بلده بعد القمة الروسية الأفريقية	73	{}	{}	0	0	[]	0
1686395364977311745	FALSE	155	82	946	18	4	90771	1038133348521181056	ar	[]	[]	['أم_قصر', 'ام_قصر_عراقية']	[]	['https://twitter.com/E_FaItH_2/status/1686395364977311745/video/1']	[]	[]	[]	[]	[]	[]	TRUE	[]	2023-08-01 15:16:01	TRUE	أهالي #أم_قصر ينتفضون كل طابوكه تنشال من أم قصر مقابيلها شهيد #ام_قصر_عراقية https://t.co/bmfIKvnRq6	everyone	1	2018-09-07 18:34:12	إلي أصله طيب حتى بعداوته شريف 🇮🇶 IRAQ	['http://t.me/crsyrian']	[]	[]		FALSE	9856	2071	97140	1	188813	FALSE	90	أهالي أم قصر ينتفضون كل طابوكه تنشال من أم قصر مقابيلها شهيد ام قصر عراقية	76	{}	{}	0	0	[]	0
1685737168226930688	FALSE	52	23	284	2	8	7230	1651999624612261888	ar	['الخرطوم']	['Place']	[]	[]	['https://twitter.com/farahSa82864253/status/1685737168226930688/video/1']	[]	[]	[]	[]	[]	[]	TRUE	[]	2023-07-30 19:40:35	TRUE	فك اللجام الآن ... قواتكم المسلحة الباسلة تقوم بإبادة مجموعة من الميليشيا حاولت اليوم دخول أحد أسواق حبل أولياء جنوب الخرطوم!! https://t.co/9B10lLpH50	everyone	1	2023-04-28 17:20:09	غافلٌ من لا يشعر بمدى خطورة الجنجويد على كيان السودان.. والأشد غفلةً ذاك الذي يعتقد أن عقيدة تكوين ميليشيا الجنجويد نفس عقيدة تكوين الجيش السوداني الوطني!!	[]	[]	[]		FALSE	19151	2200	3899	10	1898	FALSE	91	فك اللجام الآن ... قواتكم المسلحة الباسلة تقوم بإبادة مجموعة من الميليشيا حاولت اليوم دخول أحد أسواق حبل أولياء جنوب الخرطوم	126	{}	{}	0	1	[]	0
1686089497937584128	FALSE	0	0	1	0	0	430	1541478098092397056	ar	['رياض محرز']	['Person']	[]	[]	['https://twitter.com/bdalrhm26457255/status/1686089497937584128/video/1']	[]	[]	['Business Taxonomy', 'Person', 'Athlete', 'Unified Twitter Taxonomy', 'Unified Twitter Taxonomy', 'Unified Twitter Taxonomy']	['Categories within Brand Verticals that narrow down the scope of Brands', 'Named people in the world like Nelson Mandela', 'An athlete in the world, like Serena Williams or Lionel Messi', 'A taxonomy of user interests. ', 'A taxonomy of user interests. ', 'A taxonomy of user interests. ']	['Sports & Fitness Business', 'Riyad Mahrez', 'Riyad Mahrez', 'Soccer', 'Riyad Mahrez', 'Sports']	['Brands, companies, advertisers and every non-person handle with the profit intent related to sports nutrition, athletic apparel, sports apps, fitness venues', '', '', '', '', 'Sports']	TRUE	[]	2023-07-31 19:00:36	TRUE	📸هدف رياض محرز اليوم في التمرين هذي البداية 😍💚💚💚💚💚💚💚💚💚💚💚💚💚💚💚💚 https://t.co/rQZ2cU2Sfa	everyone	1	2022-06-27 17:47:09		[]	[]	[]		FALSE	174	1605	8524	0	9088	FALSE	97	هدف رياض محرز اليوم في التمرين هذي البداية	44	{'💚': 'green heart', '😍': 'smiling face with heart-eyes', '📸': 'camera with flash'}	{'💚': 16, '😍': 1, '📸': 1}	18	1	[]	0
1685622985233702912	FALSE	821	2950	2112	337	55	5660595	394214263	ar	['اليابان']	['Place']	['النصر', 'النصر_انتر_ميلان']	[]	['https://twitter.com/AliKuemkh/status/1685622985233702912/photo/1']	[]	[]	['Sports Team', 'Business Taxonomy', 'Unified Twitter Taxonomy', 'Unified Twitter Taxonomy', 'Unified Twitter Taxonomy']	['A sports team organization, like Arsenal and the Boston Celtics', 'Categories within Brand Verticals that narrow down the scope of Brands', 'A taxonomy of user interests. ', 'A taxonomy of user interests. ', 'A taxonomy of user interests. ']	['Al-Nassr FC', 'Sports & Fitness Business', 'Al-Nassr FC', 'Soccer', 'Sports']	['', 'Brands, companies, advertisers and every non-person handle with the profit intent related to sports nutrition, athletic apparel, sports apps, fitness venues', '', '', 'Sports']	TRUE	[]	2023-07-30 12:06:51	FALSE	منظر عالمي لزحمة الجماهير حول باص #النصر في اليابان. #النصر_انتر_ميلان https://t.co/IsY5vNug5C	everyone	1	2011-10-19 18:59:17	مدرب ⚽ coach، مشرف عام الاكاديمية الاوربيه ⚽️ efsfg ..	[]	[]	[]	Riyadh, Saudi Arabia	FALSE	163953	1818	161379	495	41626	FALSE	92	منظر عالمي لزحمة الجماهير حول باص النصر في اليابان. النصر انتر ميلان	71	{}	{}	0	1	[]	0
1686060114380206080	FALSE	67	146	441	16	6	23098	1471205526507864064	ar	[]	[]	['الجزائر']	[]	['https://twitter.com/DavidLe29615893/status/1686060114380206080/video/1']	[]	[]	[]	[]	[]	[]	TRUE	[]	2023-07-31 17:03:51	TRUE	مقطع فيديو يبرز احترافية #الجزائر في مجال الإنقاذ. https://t.co/XTKwtXKr0R	everyone	1	2021-12-15 19:48:46	مغربي يهودي🇮🇱🇲🇦- كاتب، محلل سياسي، باحث وأستاذ جامعي - יהודי מרוקאי - סופר, אנליסט פוליטי, חוקר ופרופסור באוניברסיטת תל אביב	[]	[]	[]	Tel Aviv	FALSE	37685	236	2467	41	35353	FALSE	93	مقطع فيديو يبرز احترافية الجزائر في مجال الإنقاذ.	50	{}	{}	0	0	[]	0
1589334452609912832	FALSE	497	200	1852	83	26	0	1471205526507864064	ar	['المملكة', 'المغربية', 'الجزائر']	['Place', 'Place', 'Place']	['السوريين', 'الجزائر']	[]	['https://twitter.com/DavidLe29615893/status/1589334452609912832/video/1']	[]	[]	[]	[]	[]	[]	TRUE	[]	2022-11-06 19:10:36	TRUE	المملكة المغربية تستضيف #السوريين الذين رمتهم #الجزائر في صحراء النيجر بين العقارب و الثعابين بدون ماء او طعام. كبرانات الجزائر لا رحمة ولا شفقة لهم. https://t.co/X5bs6G9598	everyone	1	2021-12-15 19:48:46	مغربي يهودي🇮🇱🇲🇦- كاتب، محلل سياسي، باحث وأستاذ جامعي - יהודי מרוקאי - סופר, אנליסט פוליטי, חוקר ופרופסור באוניברסיטת תל אביב	[]	[]	[]	Tel Aviv	FALSE	37685	236	2467	41	35353	FALSE	675	المملكة المغربية تستضيف السوريين الذين رمتهم الجزائر في صحراء النيجر بين العقارب و الثعابين بدون ماء او طعام. كبرانات الجزائر لا رحمة ولا شفقة لهم.	148	{}	{}	0	3	[]	0
1686099683284783104	FALSE	51	73	141	7	22	285794	1325418249308212992	ar	[]	[]	[]	[]	['https://twitter.com/m69mf/status/1686099683284783104/video/1']	[]	[]	[]	[]	[]	[]	TRUE	[]	2023-07-31 19:41:05	TRUE	حسبي الله عليك يانجس 🙄 https://t.co/Ialyt2sRwS	everyone	1	2020-11-08 12:42:22	‏‏‏‏‏‏‏هو شاعر صعلوك معدم وقد سلطه الله علي شعراء البلاط ليأخذ منهم الجزيه ينام بالعراء وسقف بيته السماء لايخاف من أحد، الحمدالله علي نعمة آل صباح 🤍	[]	[]	[]	العاصمه, دولة الكويت	FALSE	108942	8833	97305	28	135743	FALSE	94	حسبي الله عليك يانجس	22	{'🙄': 'face with rolling eyes'}	{'🙄': 1}	1	0	[]	0
1687605554208722944	FALSE	51	15	63	4	3	30354	1325418249308212992	ar	['حسن العلوي', 'الكويت', 'الكويت']	['Person', 'Place', 'Place']	[]	[]	['https://twitter.com/m69mf/status/1687605554208722944/video/1', 'https://twitter.com/m69mf/status/1687605554208722944/video/1']	[]	[]	[]	[]	[]	[]	TRUE	[]	2023-08-04 23:24:52	TRUE	الكاتب الكبير حسن العلوي❗️ يرد علي الرفيقه عاليه ملص نصيف المحرضه ضد الكويت وترسيم الحدود والمقطع الثاني بعض الجهلاء يقومون بتمزيق علم الكويت نبي صاحبنا اللي راح مشي من بيتهم للبصره يمون عليهم يكلمهم شفيهم علينا 😂 https://t.co/LxfjvAv8lZ	everyone	1	2020-11-08 12:42:22	‏‏‏‏‏‏‏هو شاعر صعلوك معدم وقد سلطه الله علي شعراء البلاط ليأخذ منهم الجزيه ينام بالعراء وسقف بيته السماء لايخاف من أحد، الحمدالله علي نعمة آل صباح 🤍	[]	[]	[]	العاصمه, دولة الكويت	FALSE	108942	8833	97305	28	135743	FALSE	81	الكاتب الكبير حسن العلوي يرد علي الرفيقه عاليه ملص نصيف المحرضه ضد الكويت وترسيم الحدود والمقطع الثاني بعض الجهلاء يقومون بتمزيق علم الكويت نبي صاحبنا اللي راح مشي من بيتهم للبصره يمون عليهم يكلمهم شفيهم علينا	215	{'😂': 'face with tears of joy', '❗': 'red exclamation mark'}	{'😂': 1, '❗': 1}	2	3	[]	0
1586426935168712706	FALSE	1	0	1	0	0	0	1325418249308212992	ar	['ترامب', 'تويتر']	['Person', 'Product']	[]	[]	['https://twitter.com/m69mf/status/1586426935168712706/video/1']	[]	[]	['Business Taxonomy', 'Business Taxonomy', 'Person', 'Entities [Entity Service]', 'Brand', 'Interests and Hobbies Vertical', 'Interests and Hobbies Category', 'Unified Twitter Taxonomy', 'Unified Twitter Taxonomy', 'Unified Twitter Taxonomy']	['Categories within Brand Verticals that narrow down the scope of Brands', 'Categories within Brand Verticals that narrow down the scope of Brands', 'Named people in the world like Nelson Mandela', 'Entity Service top level domain, every item that is in Entity Service should be in this domain', 'Brands and Companies', 'Top level interests and hobbies groupings, like Food or Travel', 'A grouping o…	['Financial Services Business', 'Technology Business', 'Elon Musk', 'Services', 'X', 'Business & finance', 'Leadership', 'Elon Musk', 'Tech personalities', 'Business personalities']	['Brands, companies, advertisers and every non-person handle with the profit intent related to Banks, Credit cards, Insurance, Investments, Stocks ', 'Brands, companies, advertisers and every non-person handle with the profit intent related to softwares, apps, communication equipments, hardwares', 'Elon Musk', '', '', '', 'Leadership', 'Elon Musk', 'Tech Professionals', '']	TRUE	[]	2022-10-29 18:37:10	TRUE	هذا اللي يقدح من راسه تري المقطع (مركب) أعتقد🤣 إيلون ماسك لموظفة أوقفت حساب ترامب على تويتر: أنتي مطرودة!. https://t.co/pOeadGVTFZ	everyone	1	2020-11-08 12:42:22	‏‏‏‏‏‏‏هو شاعر صعلوك معدم وقد سلطه الله علي شعراء البلاط ليأخذ منهم الجزيه ينام بالعراء وسقف بيته السماء لايخاف من أحد، الحمدالله علي نعمة آل صباح 🤍	[]	[]	[]	العاصمه, دولة الكويت	FALSE	108942	8833	97305	28	135743	FALSE	690	هذا اللي يقدح من راسه تري المقطع مركب أعتقد إيلون ماسك لموظفة أوقفت حساب ترامب على تويتر: أنتي مطرودة.	103	{'🤣': 'rolling on the floor laughing'}	{'🤣': 1}	1	2	[]	0
1685704571782348801	FALSE	0	0	1	0	0	23	1586666989	und	[]	[]	[]	[]	['https://twitter.com/allaowalamari7/status/1685704571782348801/photo/1']	[]	[]	[]	[]	[]	[]	TRUE	[]	2023-07-30 17:31:03	TRUE	اليمن_ارض_الحضاره منطقة ورزان محافظة تعز 🇾🇪 Yemen_land_of_civilization and Warzan region, Taiz governorate https://t.co/7kjLljQdZA	everyone	1	2013-07-11 19:39:47	رضيت بالله ربا وبالإسلام دينا ومحمد صل الله عليه وسلم نبيا ورسولا الحمدلله لا اله الا الله استغفرالله اللهم أغفر وأرحم وانت خير الراحمين .	[]	[]	[]	sanaa yamen	FALSE	1148	4955	125329	4	29585	FALSE	95	اليمن ارض الحضاره منطقة ورزان محافظة تعز	51	{'🇾🇪': 'flag: Yemen'}	{'🇾🇪': 1}	1	0	[]	0
1686146430669344768	FALSE	0	4	7	1	0	9178	1249719896856048128	ar	['صلاح', 'انمار']	['Person', 'Person']	[]	[]	['https://twitter.com/any11_2/status/1686146430669344768/photo/1']	[]	[]	[]	[]	[]	[]	TRUE	[]	2023-07-31 22:46:50	FALSE	صورة متداولة صلاح و انمار الحايلي. https://t.co/oKNNfdIEuC	everyone	1	2020-04-13 15:23:46	اليوم فوق التراب وغدٱ تحت التراب | مشجع للاتحاد ونيوكاسل	[]	[]	[]	اللهم ارحم ابي واغفر له	FALSE	6459	769	18510	8	2919	FALSE	96	صورة متداولة صلاح و انمار الحايلي.	35	{}	{}	0	2	[]	0
1685740733632856065	FALSE	14	23	23	1	6	41441	48426919	ar	[]	[]	['أتراك', 'سوريّا', 'اسطنبول']	[]	['https://twitter.com/marrakchy/status/1685740733632856065/video/1']	[]	[]	[]	[]	[]	[]	TRUE	[]	2023-07-30 19:54:45	TRUE	فيديو صادم.. #أتراك يقتلون بقالا #سوريّا في #اسطنبول والعاملين معه https://t.co/Xkr6v1uRUx	everyone	1	2009-06-18 17:44:10	أكبر خطر يهدد الهوية المغربية هو إغراق البلاد بالمهاجرين الأفارقة وتوطينهم في #المغرب🇲🇦	[]	['المغرب']	[]		FALSE	421	215	11548	0	5443	FALSE	98	فيديو صادم.. أتراك يقتلون بقالا سوريّا في اسطنبول والعاملين معه	64	{}	{}	0	0	[]	0
1685238044826169344	FALSE	58	0	340	1	5	15754	486886735	ar	[]	[]	[]	[]	['https://twitter.com/crm_200/status/1685238044826169344/video/1']	[]	[]	[]	[]	[]	[]	TRUE	[]	2023-07-29 10:37:14	TRUE	هنا كافوري قوات العمل الخاص وقوات الاحتياطي المركزي والمظلات تلقت المليشيا الجبانة دروس قاسية https://t.co/mOdmg9yqSQ	mentionedUsers	1	2012-02-08 19:37:44		[]	['المغرب']	[]	Nairobi, Kenya	FALSE	31405	9675	48490	54	16906	FALSE	99	هنا كافوري قوات العمل الخاص وقوات الاحتياطي المركزي والمظلات تلقت المليشيا الجبانة دروس قاسية	94	{}	{}	0	0	[]	0
1685245308081496064	FALSE	26	5	108	0	2	4057	1453047626807620096	ar	[]	[]	['يلا_نمشي_بيتنا', 'جيش_واحد_وطن_واحد', 'قحت_لاتمثلني']	[]	['https://twitter.com/glmrasas10/status/1685245308081496064/video/1']	[]	[]	[]	[]	[]	[]	TRUE	[]	2023-07-29 11:06:06	TRUE	🔴كافوري الجنجويد الرصاص يلقط فيهم زي الجراد 📌 #يلا_نمشي_بيتنا #جيش_واحد_وطن_واحد #قحت_لاتمثلني https://t.co/JU7YrZlbUK	everyone	1	2021-10-26 17:15:39	محلل سياسي	[]	['المغرب']	[]	Sudan	FALSE	8868	4802	10357	10	23278	FALSE	99	كافوري الجنجويد الرصاص يلقط فيهم زي الجراد يلا نمشي بيتنا جيش واحد وطن واحد قحت لاتمثلني	92	{'📌': 'pushpin', '🔴': 'red circle'}	{'📌': 1, '🔴': 1}	2	0	[]	0
1685735902578946048	FALSE	21	9	71	1	0	2367	1453047626807620096	ar	[]	[]	['يلا_نمشي_بيتنا', 'قناة_الحدث_الجزيرة_عملاء', 'فك_اللجام', 'انا_افوض_القوات_المسلحة_السودانية']	[]	['https://twitter.com/glmrasas10/status/1685735902578946048/video/1']	[]	[]	[]	[]	[]	[]	TRUE	[]	2023-07-30 19:35:33	TRUE	🔴 تم قتلهم فى مدخل سوق جبل اولياء محاولين الهروب من الحرب 📌 #يلا_نمشي_بيتنا #قناة_الحدث_الجزيرة_عملاء #فك_اللجام #انا_افوض_القوات_المسلحة_السودانية https://t.co/Zsi7pYV25t	everyone	1	2021-10-26 17:15:39	محلل سياسي	[]	['المغرب']	[]	Sudan	FALSE	8868	4802	10357	10	23278	FALSE	91	تم قتلهم فى مدخل سوق جبل اولياء محاولين الهروب من الحرب يلا نمشي بيتنا قناة الحدث الجزيرة عملاء فك اللجام انا افوض القوات المسلحة السودانية	145	{'📌': 'pushpin', '🔴': 'red circle'}	{'📌': 1, '🔴': 1}	2	0	[]	0
1661837267571187737	FALSE	20	12	38	3	7	6335	1453047626807620096	ar	[]	[]	[]	[]	['https://twitter.com/glmrasas10/status/1661837267571187737/video/1']	[]	[]	[]	[]	[]	[]	TRUE	[]	2023-05-25 20:50:54	TRUE	الله اكبر ✋ التصفية الجسدية لكل منسحب من ارض المعركة . المرتزقة اجرام حتى مع قواتهم يبدوا موت عبدالرحيم دقلوا سخن الشغل https://t.co/9NcTGVYDgb	everyone	1	2021-10-26 17:15:39	محلل سياسي	[]	['المغرب']	[]	Sudan	FALSE	8868	4802	10357	10	23278	FALSE	274	الله اكبر التصفية الجسدية لكل منسحب من ارض المعركة . المرتزقة اجرام حتى مع قواتهم يبدوا موت عبدالرحيم دقلوا سخن الشغل	120	{'✋': 'raised hand'}	{'✋': 1}	1	0	[]	0
1661680456704696321	TRUE	100	184	192	75	131	110907	1453047626807620096	ar	[]	[]	[]	[]	['https://twitter.com/glmrasas10/status/1661680456704696321/video/1']	[]	[]	[]	[]	[]	[]	TRUE	[]	2023-05-25 10:27:48	TRUE	اي زول يدعم الجنجويد يشوف الفيديو دا ديل ما بشر ✋✋✋✋ https://t.co/6kvWdxK5u8	everyone	1	2021-10-26 17:15:39	محلل سياسي	[]	['المغرب']	[]	Sudan	FALSE	8868	4802	10357	10	23278	FALSE	276	اي زول يدعم الجنجويد يشوف الفيديو دا ديل ما بشر	49	{'✋': 'raised hand'}	{'✋': 4}	4	0	[]	0
1685750233479716864	FALSE	0	1	1	0	0	805	1321899173357243904	ar	[]	[]	['أتراك', 'سوريا', 'اسطنبول', 'اليوم_play', 'قناة_اليوم']	[]	['https://twitter.com/alyaum_news/status/1685750233479716864/video/1']	[]	[]	[]	[]	[]	[]	TRUE	[]	2023-07-30 20:32:30	TRUE	شبان #أتراك يقتلون بقالا #سوريا في #اسطنبول والعاملين معه #اليوم_play #قناة_اليوم https://t.co/CNJRzzzN6H	everyone	1	2020-10-29 19:38:25	في قناتنا نبحث في تفاصيل الحدث وأبعاده وعوامله ونقدمه للمشاهد بصيغة موضوعية مرتبطة بالماضي واليوم والمستقبل.	[]	[]	[]		FALSE	2151	2	68749	12	1	FALSE	98	شبان أتراك يقتلون بقالا سوريا في اسطنبول والعاملين معه اليوم قناة اليوم	74	{}	{}	0	0	[]	0
1684984318760751104	FALSE	16	17	36	1	5	14373	1388797272532606976	ar	[]	[]	[]	[]	['https://twitter.com/AmkAlkhater53/status/1684984318760751104/video/1']	[]	[]	[]	[]	[]	[]	TRUE	[]	2023-07-28 17:49:01	TRUE	لاحظ ماذا حدث عند تصادم سيارتين تعملان على الطاقة الكهربائية! عند إشتعال بطارية ليثيوم السيارات الكهربائية .. ليس من السهل إطفائها وسوف تحدث كارثة حقيقية. https://t.co/vojFvBTS6j	everyone	1	2021-05-02 10:07:52	مَا يَلْفِظُ مِنْ قَوْلٍ إِلَّا لَدَيْهِ رَقِيبٌ عَتِيدٌ} حساب بديل ..	[]	[]	[]		FALSE	16353	189	6920	19	5082	FALSE	101	لاحظ ماذا حدث عند تصادم سيارتين تعملان على الطاقة الكهربائية عند إشتعال بطارية ليثيوم السيارات الكهربائية .. ليس من السهل إطفائها وسوف تحدث كارثة حقيقية.	154	{}	{}	0	0	[]	0
1685353821910777856	FALSE	606	122	2434	57	245	1639169	1258088484377592064	ar	[]	[]	['فيديو', 'النيجر', 'فرنسا', 'فرنسا']	[]	['https://twitter.com/i/web/status/1685353821910777856', 'https://twitter.com/inpic0/status/1685353821910777856/video/1']	[]	[]	[]	[]	[]	[]	TRUE	[]	2023-07-29 18:17:18	FALSE	#فيديو من #النيجر بعد الإنقلاب الناجح على رئيس البلاد الموالي لـ #فرنسا هكذا هو حال وزير المالية الذي تم منحه 48 ساعة لتوضيح سوء الوضع المالي للبلاد و مكان اختفاء اموال الدولة التي سُرقت أو مواجهة الإعدام رمياً بالرصاص. •بعد أن خسرت #فرنسا مالي وبوركينا فاسو وإفريقيا الوسطى،… https://t.co/yK112wFFaN https://t.co/zVHPRMIjEA	everyone	1	2020-05-06 17:37:41	نغرد عن الـتاريخ والحاضر ننشر صور ومعلومات و احداث وسياسية وغرائب عالمية متـنــوعــة نهدف لنشر الوعي .. حسابنا البديل@inpic9🌷	[]	[]	[]	الإختلاف في الرأي لا يفسد الود	FALSE	283296	397	8184	446	7441	FALSE	100	فيديو من النيجر بعد الإنقلاب الناجح على رئيس البلاد الموالي لـ فرنسا هكذا هو حال وزير المالية الذي تم منحه 48 ساعة لتوضيح سوء الوضع المالي للبلاد و مكان اختفاء اموال الدولة التي سُرقت أو مواجهة الإعدام رمياً بالرصاص. بعد أن خسرت فرنسا مالي وبوركينا فاسو وإفريقيا الوسطى،	276	{}	{}	0	0	[]	0
1685207220462776321	FALSE	7	0	20	1	0	651	4434130403	ar	[]	[]	['نجوى_كرم', 'نجوى_كرم_في_جرش']	['najwakaram']	['https://twitter.com/iMohammed91/status/1685207220462776321/photo/1']	[]	[]	['Person', 'Business Taxonomy', 'Musician', 'Music Genre', 'Unified Twitter Taxonomy', 'Unified Twitter Taxonomy', 'Unified Twitter Taxonomy']	['Named people in the world like Nelson Mandela', 'Categories within Brand Verticals that narrow down the scope of Brands', 'A musician in the world, like Adele or Bob Dylan', 'A category for a musical style, like Pop, Rock, or Rap', 'A taxonomy of user interests. ', 'A taxonomy of user interests. ', 'A taxonomy of user interests. ']	['Najwa Karam', 'Entertainment & Leisure Business', 'Najwa Karam', 'Pop', 'Pop', 'Music', 'Najwa Karam']	['', 'Brands, companies, advertisers and every non-person handle with the profit intent related to movies, music, television, franchises, venues, theme parks, toys, tourism, hotels', '', 'Pop', 'Pop', 'Music and radio', '']	TRUE	[]	2023-07-29 08:34:45	TRUE	رسمياً! #نجوى_كرم تدخل موسوعة غينيس 🔥 - ومجدّداً ومن أوسع أبواب المجد أول فنانة عربية بتزين الصفحة الرئيسية لموقع موسوعة غينيس للأرقام القياسية بحدَث جديد ينضاف لأرشيفها العظيم ✨ #نجوى_كرم_في_جرش | @najwakaram https://t.co/SXQ61yhBuF	everyone	1	2015-12-10 05:10:34	Live , Love , Worship Allah ✨ | ♈️ | April 15, 1991 | MA English Scholar and Trainer 📚 | Tweet wisley and Retweet worthily 🪄 | #Syrian so much ♥️ ..	[]	['Syrian']	[]	Syria	FALSE	177	117	2927	0	3583	FALSE	102	رسمياً نجوى كرم تدخل موسوعة غينيس ومجدّداً ومن أوسع أبواب المجد أول فنانة عربية بتزين الصفحة الرئيسية لموقع موسوعة غينيس للأرقام القياسية بحدَث جديد ينضاف لأرشيفها العظيم نجوى كرم في جرش	192	{'🔥': 'fire', '✨': 'sparkles'}	{'🔥': 1, '✨': 1}	2	0	[]	0
1683576482621276160	FALSE	0	0	0	0	0	53	1594445151098715904	ar	['الجزائر', 'بجاية']	['Place', 'Place']	[]	[]	['https://twitter.com/mhimedbentayeb/status/1683576482621276160/video/1']	[]	[]	[]	[]	[]	[]	TRUE	[]	2023-07-24 20:34:47	TRUE	⭕تعمل الحماية المدنية والجيش الجزائري على إخماد الحرائق الجارية في الجزائر ، ولا سيما في منطقة بجاية. عدة طاٸرات كنديار و طائرات هليكوبتر + سيارات إطفاء. الدولة معبأة! 🇩🇿 https://t.co/blOZJtt8eA	everyone	1	2022-11-20 21:39:13	Bio	[]	['Syrian']	[]		FALSE	107	387	2005	2	213	FALSE	111	تعمل الحماية المدنية والجيش الجزائري على إخماد الحرائق الجارية في الجزائر ، ولا سيما في منطقة بجاية. عدة طاٸرات كنديار و طائرات هليكوبتر سيارات إطفاء. الدولة معبأة	168	{'🇩🇿': 'flag: Algeria', '⭕': 'hollow red circle'}	{'🇩🇿': 1, '⭕': 1}	2	2	[]	0
1684312196547850246	FALSE	68	70	152	6	4	189834	515118594	qme	[]	[]	[]	[]	['https://twitter.com/aziz8848/status/1684312196547850246/video/1']	[]	[]	[]	[]	[]	[]	TRUE	[]	2023-07-26 21:18:15	TRUE	💛💛😍💛💛 https://t.co/Y94ntNgiBG	everyone	1	2012-03-05 05:15:55	✈️🛰#نصراوي @Alnassrfc http://. موثوق 151401 للاعلانات واتس💛0595208848	[]	['نصراوي']	[]	مملكة العز KSA	FALSE	40722	694	97738	72	2571	FALSE	104		1	{'💛': 'yellow heart', '😍': 'smiling face with heart-eyes'}	{'💛': 4, '😍': 1}	5	0	[]	0
1683574583998177280	FALSE	40	12	102	4	1	2621	1655869056723874048	ar	['الجزائر']	['Place']	[]	[]	['https://twitter.com/ECHOROUKmaroc2/status/1683574583998177280/photo/1']	[]	[]	['Business Taxonomy']	['Categories within Brand Verticals that narrow down the scope of Brands']	['Gaming Business']	['Brands, companies, advertisers and every non-person handle with the profit intent related to offline and online games such as gaming consoles, tabletop games, video game publishers']	TRUE	[]	2023-07-24 20:27:14	TRUE	🚨🚨🚨 هكدا يتم اشعال النار في غابات الجزائر وغابات القبايل المحتلة من طرف النظام العسكري الجزئري الإرهابي المعزول إقليميا ودوليا. نظام يحرق شعبه أحياء ويشويهم شويا بدم بارد. والقطيع الكرغولي المبردع لايستطيع القيام بأي شيء. بل وقاحته وسفالته تجعله يولي وجهه شطر المروك المقدس. https://t.co/D4RmjpY4MA	everyone	1	2023-05-09 09:36:20	خبير استراتيجي ومحلل أمني باحث في القانون والعلاقات الدولية	[]	['نصراوي']	[]	المملكة المغربية	FALSE	5127	1833	8106	9	22286	FALSE	105	هكدا يتم اشعال النار في غابات الجزائر وغابات القبايل المحتلة من طرف النظام العسكري الجزئري الإرهابي المعزول إقليميا ودوليا. نظام يحرق شعبه أحياء ويشويهم شويا بدم بارد. والقطيع الكرغولي المبردع لايستطيع القيام بأي شيء. بل وقاحته وسفالته تجعله يولي وجهه شطر المروك المقدس.	273	{'🚨': 'police car light'}	{'🚨': 3}	3	1	[]	0
1665679736784277505	FALSE	75	14	199	2	0	3001	1655869056723874048	ar	[]	[]	[]	[]	['https://twitter.com/ECHOROUKmaroc2/status/1665679736784277505/photo/1']	[]	[]	[]	[]	[]	[]	TRUE	[]	2023-06-05 11:19:30	TRUE	أبناء شعب_الأزواد_ الأبي الذين يعيشون تحت وطأة_دولة الإحتلال الجزائري _يحلمون اليوم بحياة كريمة_وكلهم أمل في*تقرير مصيرهم*يوما ما في ظل جمهورية_الأزواد_الأسطورية" التي خرجت من رحم الإمبراطورية المغربية المحمدية الشريفة. والتخلص من الإحتلال الجزائري الإرهابي الغاشم الجبان. https://t.co/OKFCJ6l02F	everyone	1	2023-05-09 09:36:20	خبير استراتيجي ومحلل أمني باحث في القانون والعلاقات الدولية	[]	['نصراوي']	[]	المملكة المغربية	FALSE	5127	1833	8106	9	22286	FALSE	205	أبناء شعب الأزواد الأبي الذين يعيشون تحت وطأة دولة الإحتلال الجزائري يحلمون اليوم بحياة كريمة وكلهم أمل فيتقرير مصيرهميوما ما في ظل جمهورية الأزواد الأسطورية التي خرجت من رحم الإمبراطورية المغربية المحمدية الشريفة. والتخلص من الإحتلال الجزائري الإرهابي الغاشم الجبان.	271	{}	{}	0	0	[]	0
1683759120980090880	FALSE	128	38	723	11	9	87701	1296775312253039104	ar	['إسرائيل']	['Place']	[]	[]	['https://twitter.com/Russianowarabic/status/1683759120980090880/video/1']	[]	[]	[]	[]	[]	[]	TRUE	[]	2023-07-25 08:40:31	TRUE	فتاة تتحدى خرطوم المياه خلال مظاهرات إسرائيل، لكن النهاية كانت سيئة https://t.co/1a6kCZC6BU	everyone	1	2020-08-21 11:45:17	روسيا الآن ، تختص بنقل كافة الأخبار الروسية والعالمية على مدار الساعة من أرض الحدث.	[]	[]	[]	Moscow, Russia	FALSE	449229	0	15067	434	79	FALSE	106	فتاة تتحدى خرطوم المياه خلال مظاهرات إسرائيل، لكن النهاية كانت سيئة	68	{}	{}	0	1	[]	0
1685967543280734208	FALSE	241	30	1792	13	7	105570	1296775312253039104	ar	['أنتوني بوتس', 'واشنطن', 'روسيا', 'دنيبروبيتروفسك']	['Person', 'Place', 'Place', 'Place']	[]	[]	['https://twitter.com/Russianowarabic/status/1685967543280734208/photo/1']	[]	[]	[]	[]	[]	[]	TRUE	[]	2023-07-31 10:56:00	TRUE	تأكيد مصرع الجنرال الأمريكي أنتوني بوتس، وزعمت واشنطن انه لقي مصرعه في حادث تحطم طائرة. هذا الحدث صادف في نفس اليوم الذي دمرت روسيا مبنى جهاز الامن الاوكراني في دنيبروبيتروفسك. للعلم هو أكثر ضباط المارينز تواجداً بأوروبا و في اوكرانيا https://t.co/8GcDtVjOgs	everyone	0	2020-08-21 11:45:17	روسيا الآن ، تختص بنقل كافة الأخبار الروسية والعالمية على مدار الساعة من أرض الحدث.	[]	[]	[]	Moscow, Russia	FALSE	449229	0	15067	434	79	FALSE	43	تأكيد مصرع الجنرال الأمريكي أنتوني بوتس، وزعمت واشنطن انه لقي مصرعه في حادث تحطم طائرة. هذا الحدث صادف في نفس اليوم الذي دمرت روسيا مبنى جهاز الامن الاوكراني في دنيبروبيتروفسك. للعلم هو أكثر ضباط المارينز تواجداً بأوروبا و في اوكرانيا	236	{}	{}	0	4	[]	0
1674172996963926021	FALSE	6	3	206	1	0	15955	1296775312253039104	ar	['جدة']	['Place']	[]	[]	[]	[]	[]	[]	[]	[]	[]	TRUE	[]	2023-06-28 21:48:41	TRUE	تبادل لإطلاق النار أمام القنصلية الأميركية في جدة ومقتل المهاجم وحارس أمن	everyone	0	2020-08-21 11:45:17	روسيا الآن ، تختص بنقل كافة الأخبار الروسية والعالمية على مدار الساعة من أرض الحدث.	[]	[]	[]	Moscow, Russia	FALSE	449229	0	15067	434	79	FALSE	167	تبادل لإطلاق النار أمام القنصلية الأميركية في جدة ومقتل المهاجم وحارس أمن	73	{}	{}	0	1	[]	0
1665047574007406593	FALSE	157	51	1481	17	25	171004	1296775312253039104	ar	[]	[]	[]	[]	['https://twitter.com/Russianowarabic/status/1665047574007406593/video/1']	[]	[]	[]	[]	[]	[]	TRUE	[]	2023-06-03 17:27:31	TRUE	جندي في الجيش المصري يٌهنئ زميله الجندي المصري الذي ارتقى اليوم بعد تنفيذ العملية على الحدود المصرية الفلسطينية. https://t.co/9CqEmy1cUZ	everyone	1	2020-08-21 11:45:17	روسيا الآن ، تختص بنقل كافة الأخبار الروسية والعالمية على مدار الساعة من أرض الحدث.	[]	[]	[]	Moscow, Russia	FALSE	449229	0	15067	434	79	FALSE	241	جندي في الجيش المصري يٌهنئ زميله الجندي المصري الذي ارتقى اليوم بعد تنفيذ العملية على الحدود المصرية الفلسطينية.	113	{}	{}	0	0	[]	0
1662732934061621249	FALSE	15	29	243	3	0	37782	1296775312253039104	ar	['إيران']	['Place']	[]	[]	['https://twitter.com/Russianowarabic/status/1662732934061621249/video/1']	[]	[]	[]	[]	[]	[]	TRUE	[]	2023-05-28 08:09:58	TRUE	حركة طالبان تنقل قوات ، وأسلحة ثقيلة إلى الحدود مع إيران https://t.co/X7NxrISNME	everyone	1	2020-08-21 11:45:17	روسيا الآن ، تختص بنقل كافة الأخبار الروسية والعالمية على مدار الساعة من أرض الحدث.	[]	[]	[]	Moscow, Russia	FALSE	449229	0	15067	434	79	FALSE	272	حركة طالبان تنقل قوات ، وأسلحة ثقيلة إلى الحدود مع إيران	57	{}	{}	0	1	[]	0
1651682057020403721	FALSE	6	269	232	28	2	88505	1296775312253039104	ar	['زيلينسكي', 'النصر']	['Person', 'Organization']	[]	[]	['https://twitter.com/Russianowarabic/status/1651682057020403721/photo/1']	[]	[]	[]	[]	[]	[]	TRUE	[]	2023-04-27 20:17:43	TRUE	زيلينسكي: أتطلع لدعم الدول العربية لتحقيق النصر. https://t.co/f12HNJfKuu	everyone	1	2020-08-21 11:45:17	روسيا الآن ، تختص بنقل كافة الأخبار الروسية والعالمية على مدار الساعة من أرض الحدث.	[]	[]	[]	Moscow, Russia	FALSE	449229	0	15067	434	79	FALSE	333	زيلينسكي: أتطلع لدعم الدول العربية لتحقيق النصر.	49	{}	{}	0	2	['النصر']	1
1648698962524659724	FALSE	725	302	3171	115	273	1614857	1296775312253039104	ar	['الخرطوم']	['Place']	[]	[]	['https://twitter.com/Russianowarabic/status/1648698962524659724/video/1']	[]	[]	[]	[]	[]	[]	TRUE	[]	2023-04-19 14:43:58	TRUE	من داخل منزل قائد قوات الدعم السريع "حميدتي" في حي جبرة في العاصمة الخرطوم. https://t.co/dVs38kJovY	everyone	1	2020-08-21 11:45:17	روسيا الآن ، تختص بنقل كافة الأخبار الروسية والعالمية على مدار الساعة من أرض الحدث.	[]	[]	[]	Moscow, Russia	FALSE	449229	0	15067	434	79	FALSE	361	من داخل منزل قائد قوات الدعم السريع حميدتي في حي جبرة في العاصمة الخرطوم.	74	{}	{}	0	1	[]	0
1630889991919337473	FALSE	151	76	1789	16	7	193398	1296775312253039104	ar	['باخموت', '', 'الوحل', '']	['Place', 'Place', 'Place', 'Place']	[]	[]	['https://twitter.com/Russianowarabic/status/1630889991919337473/photo/1']	[]	[]	[]	[]	[]	[]	TRUE	[]	2023-03-01 11:17:29	TRUE	أول دبابة ليوبارد تم أسرها في باخموت اليوم ، غرقت الدبابة في الوحل تمكنت مجموعة من فاغنر من توجيه أنفسهم بسرعة والإستيلاء على الدبابة مع طاقمها. https://t.co/tnCTsTkTba	everyone	1	2020-08-21 11:45:17	روسيا الآن ، تختص بنقل كافة الأخبار الروسية والعالمية على مدار الساعة من أرض الحدث.	[]	[]	[]	Moscow, Russia	FALSE	449229	0	15067	434	79	FALSE	445	أول دبابة ليوبارد تم أسرها في باخموت اليوم ، غرقت الدبابة في الوحل تمكنت مجموعة من فاغنر من توجيه أنفسهم بسرعة والإستيلاء على الدبابة مع طاقمها.	147	{}	{}	0	4	[]	0
1599145008627523584	FALSE	61	208	427	153	33	0	1296775312253039104	ar	['محمد صلاح', 'دبي']	['Person', 'Place']	[]	[]	['https://twitter.com/Russianowarabic/status/1599145008627523584/photo/1']	[]	[]	['Business Taxonomy', 'Person', 'Athlete', 'Unified Twitter Taxonomy', 'Unified Twitter Taxonomy', 'Unified Twitter Taxonomy']	['Categories within Brand Verticals that narrow down the scope of Brands', 'Named people in the world like Nelson Mandela', 'An athlete in the world, like Serena Williams or Lionel Messi', 'A taxonomy of user interests. ', 'A taxonomy of user interests. ', 'A taxonomy of user interests. ']	['Sports & Fitness Business', 'Mohamed Salah', 'Mohamed Salah', 'Soccer', 'Mohamed Salah', 'Sports']	['Brands, companies, advertisers and every non-person handle with the profit intent related to sports nutrition, athletic apparel, sports apps, fitness venues', '', '', '', '', 'Sports']	TRUE	[]	2022-12-03 20:54:15	TRUE	يستمتع اللاعب المصري محمد صلاح في السباحة مع الإسرائيلي روعي كايس في دبي. https://t.co/1IFD7ppS4c	everyone	1	2020-08-21 11:45:17	روسيا الآن ، تختص بنقل كافة الأخبار الروسية والعالمية على مدار الساعة من أرض الحدث.	[]	[]	[]	Moscow, Russia	FALSE	449229	0	15067	434	79	FALSE	610	يستمتع اللاعب المصري محمد صلاح في السباحة مع الإسرائيلي روعي كايس في دبي.	75	{}	{}	0	2	[]	0
[truncated: 19,668 more rows]
[truncated: 28 more columns]
