# Supplementary material for: VERA-ARAB: unveiling the Arabic tweets credibility by constructing balanced news dataset for veracity analysis
Source: PeerJ Comput Sci. 2024 Oct 30;10:e2432. doi: 10.7717/peerj-cs.2432 (PMC11623204; doi:10.7717/peerj-cs.2432)
Supplement: Supplemental Information 2 [file peerj-cs-10-2432-s002.xlsx]

## Sheet: locations
location	iso_a3
Afghanistan	AFG
کابل. افغانستان	AFG
Casablanca, Grand Casablanca	APR
الدار البيضاء - المغرب	APR
الشارقة	ARE
الشارقة, الامارات العربية المت	ARE
الشارقة, الامارات العربية المتحدة	ARE
الشارقه	ARE
بوظبي	ARE
UAE	ARE
الإمارات العربية المتحدة	ARE
ABU DHABI & ALAIN	ARE
AD	ARE
AD - UAE	ARE
Abu Dhabi	ARE
Abu Dhabi, UAE	ARE
Abu Dhabi, United Arab Emirate	ARE
Abu Dhabi, United Arab Emirates	ARE
Abu Dhabi, Western Region	ARE
AbuDhabi	ARE
Abudhabi	ARE
Ajman	ARE
Ajman,UAE	ARE
Dubai	ARE
Dubai	ARE
Dubai , UAE	ARE
Dubai - United Arab Emirates	ARE
Dubai UAE	ARE
Dubai, UAE	ARE
Dubai, UAE	ARE
Dubai, United Arab Emeries	ARE
Dubai, United Arab Emirates	ARE
Dubai, united Arab emirates	ARE
Emirats Arabes Unis	ARE
London -UK (UAE)	ARE
RAK. UAE	ARE
Ras Al Khaimah	ARE
Sharjah - UAE .	ARE
Sharjah, United Arab Emirates	ARE
UAE	ARE
UAE	ARE
UAE حساب شخصي	ARE
UAE- Dubai	ARE
United Arab Emirates	ARE
United Arab Emirates UAE	ARE
United Arab Emirates | Dubai	ARE
United Arab Emirates,Abu Dhabi	ARE
abu dhabi UAE	ARE
alain	ARE
uae	ARE
uae abudhabi	ARE
أ بوظبي	ARE
أبوظبي	ARE
أبوظبي	ARE
أبوظبي _الامارات	ARE
أبوظبي, الامارات	ARE
أبوظبي, الامارات	ARE
أبوظبي, الامارات العربية	ARE
أبوظبي, الامارات العربية المتح	ARE
أبوظبي, الامارات العربية المتحدة	ARE
أبوظبي، الإمارات	ARE
ابوظبي	ARE
ابوظبي	ARE
الإمارات	ARE
الإمارات - الشارقة	ARE
الإمارات - العين	ARE
الإمارات العربية المتحدة	ARE
الإمارات العربية المتحدة	ARE
الإمارات العربيّة المتّحدة	ARE
الامارات	ARE
الامارات ابوظبي	ARE
الامارات العربية المتحدة	ARE
الامارات دبي	ARE
الامارات-العين دار الزين	ARE
بالبــراحـه	ARE
دبي	ARE
دبي, الامارات العربية المتحدة	ARE
دولة الإمارات - أبوظبي	ARE
دولة الإمارات العربية	ARE
دولة الإمارات العربية المتحدة	ARE
دولة الإمارات، أبوظبي	ARE
دولة الامارات العربية	ARE
دولة الامارات العربية المتحدة	ARE
دولة الامارات العربية المتحدة	ARE
دولـة الإمارات العربية المتحدة	ARE
رأس الخيمة	ARE
رأس الخيمة _ دولة الإمارات	ARE
قلب الإمارات	ARE
مدينة العين	ARE
Argentina	ARG
Argentina	ARG
Buenos Aires, Argentina	ARG
Rosario, Argentina	ARG
Australia	AUS
Gold Coast, Queensland	AUS
Sydney, Australia	AUS
Sydney, New South Wales	AUS
Vienna, Austria	AUT
النمسا/Austria	AUT
Belgique	BEL
Belgium	BEL
België	BEL
Brussels, Belgium	BEL
Bruxelles	BEL
العاصمة البلجيكة بروكسل	BEL
بلجيكا	BEL
Sylhet	BGD
البحرين	BHR
BAHRAIN	BHR
BH	BHR
Bahrain	BHR
Bahrain & Alkhobar	BHR
Bahrain.news@live.com	BHR
Epics line - Bahrain	BHR
Kingdom of Bahrain	BHR
bahrain	BHR
البحرين	BHR
بحرين الرفاع	BHR
مملكة البحرين	BHR
مملكة البحرين (دار بوسلمان)	BHR
مملكة البحرين . المحرق	BHR
مملكة البحرين الخليفية	BHR
مملكة البحرين/ المحرق	BHR
Bosnia and Herzegovina	BIH
Republic of Belarus	BLR
Brazil	BRA
Palmeiras	BRA
Sao Paulo, Brazil	BRA
Calgary, Alberta	CAN
Canada	CAN
Canada	CAN
Canada / Toronto	CAN
Cartwright, Labrador	CAN
Edmonton, Alberta	CAN
Manitoba, Canada	CAN
Mississauga	CAN
Montreal Canada	CAN
Montréal, Québec	CAN
Ottawa, Ontario	CAN
Québec, Canada	CAN
Regina, SK	CAN
Toronto, Ontario	CAN
Toronto,Canada	CAN
Toronto-Canada	CAN
Trento, Trentino-South Tyrol	CAN
كندا	CAN
Geneva, Switzerland	CHE
Genève	CHE
Georgia	CHE
Schweiz	CHE
Suisse	CHE
Switzerland	CHE
Zurich, Switzerland	CHE
beijing	CHE
switzerland	CHE
zurich switzerland	CHE
سويسرا	CHE
Beijing	CHN
People's Republic of China	CHN
Shanghai	CHN
بكين	CHN
Ivory Coast	CIV
كوستاريكا	CRI
Cuba	CUB
Cyprus	CYP
Baden-Württemberg, Germany	DEU
Bavaria, Germany	DEU
Bonn, Deutschland	DEU
Bremen	DEU
Cologne, Germany	DEU
Darmstadt, Germany	DEU
Deutschland-München	DEU
Dresden, Germany	DEU
Francfort-sur-le-Main, Allemag	DEU
Frankfurt on the Main, Germany	DEU
Germany	DEU
Heidelberg, Deutschland	DEU
Kieve, Deutschland	DEU
Munich, Bavaria	DEU
Planetal, Deutschland	DEU
Schiffbauerdamm, Berlin	DEU
Stadtverband Saarbrücken, Saar	DEU
Stuttgart, Deutschland	DEU
Trier, Germany	DEU
Wuppertal, Nordrhein-Westfalen	DEU
germany	DEU
المانيا	DEU
Djibouti	DJI
Danmark	DNK
هنا الجزائر	DZA
Cité917 Lgts Eucalyptus Alger	DZA
الجزائر	DZA
بني ثور ورقلة	DZA
خنشلة +	DZA
#عين_مديلة_فركان_تبسة	DZA
ALGERIA	DZA
ALGERIE	DZA
Adrar	DZA
Ain Bieda (Algeria)	DZA
Ain M'Lila	DZA
Alger	DZA
Alger	DZA
Alger, Algeria	DZA
Alger-Paris-Montreal	DZA
AlgerCentre #Algeria #Cairo	DZA
Algeria	DZA
Algeria	DZA
Algeria	DZA
Algeria saida	DZA
Algerie	DZA
Algiers	DZA
Algiers الجزائر	DZA
Algiers, ALGERIA	DZA
Algria	DZA
Algérie	DZA
Algérie Skikda	DZA
Algérie الجزائر	DZA
Algérie حاسي مسعود	DZA
Annaba	DZA
Annaba	DZA
Aures	DZA
Aurès, Algeria	DZA
BOUGTOUB	DZA
Bab El Oued	DZA
Batna	DZA
Blida	DZA
Constantine	DZA
Constantine - East Algeria	DZA
Constantine, Algeria.	DZA
Djelfa	DZA
HASSI-MESSAOUD ALGERIA.	DZA
Hassi Messaoud	DZA
Hussein Dey	DZA
Khenchela	DZA
Ksar El Boukhari, Médéa	DZA
La grande post, Alger centre	DZA
Laghouat	DZA
M'Sila, Bou Saada	DZA
MOSTAGANEM/مستغانم	DZA
Mascara, Algeria	DZA
Oran	DZA
Oran Algeria	DZA
Ouargla	DZA
Said hamdine	DZA
Sétif	DZA
Tafraoui, Algérie	DZA
Tamanraaset ALGERIA	DZA
alger	DZA
algeria	DZA
algerie	DZA
touggourt	DZA
إعلامية جزائرية	DZA
ارض المليون ونصف شهيد	DZA
الجزائر	DZA
الجزائر	DZA
الجزائر وهران	DZA
الجزائر (المغرب الأوسط)	DZA
الجزائر العاصمة algiers	DZA
الـــــجــزائر / بــــســكـرة	DZA
باتنة - الجزائر	DZA
بسكرة . الجزائر .	DZA
بلد المليون ونصف المليون شهيد	DZA
تلمسان	DZA
شلف، الجزائر	DZA
قسنطينة	DZA
هنا الجزائر	DZA
Ecuador	ECU
Ismalia, Egypt	EGP
مصر	EGY
بلاد العرب وEgypt	EGY
Alexandria	EGY
Egypt	EGY
القاهرة	EGY
مركز ابنوب محافظة أسيوط مصر	EGY
مصر	EGY
مصر ، الكبيرة	EGY
#egypt#zamalek#fubar#anarchism	EGY
, صعيدمصر	EGY
131 برج القانونين المعادي	EGY
6 October City, Egypt	EGY
99 حدئق الأهرام - الهرم - جيزة	EGY
Alex _ edku	EGY
Alexanderia	EGY
Alexandria	EGY
Alexandria	EGY
Alexandria , Egypt	EGY
Alexandria School of medicine	EGY
Alexandria, EGYPT	EGY
Alexandria, Egypt	EGY
Alexandria, Egypt	EGY
Alexandria, VA	EGY
Alexandria. egypt	EGY
Assuit	EGY
Aswan, Egypt	EGY
Baltim,Kafr El Shikh, Egypt	EGY
Basyoun, ElGharbiyah, Egypt.	EGY
Beba, Bani suwayf, Egypt	EGY
Beni Suef, Egypt	EGY
Burg Elarab,Alexandria,Egypt	EGY
CAIRO , EGYPT	EGY
CAIRO - EGYPT	EGY
Cairo	EGY
Cairo	EGY
Cairo , Egypt	EGY
Cairo - Egypt	EGY
Cairo - Egypt	EGY
Cairo / Egypt -Kasr Al-Ainy	EGY
Cairo Egypt	EGY
Cairo, Egypt	EGY
Cairo, Egypt	EGY
Cairo, Egypt القليوبيه. العبور	EGY
Cairo,Egypt	EGY
Cairo- Giza	EGY
Cairo‏	EGY
Dahab - south Sinai	EGY
Dokki	EGY
Domiat, Egypt	EGY
Dxb-Egypt	EGY
EGY, Mansoura/KSA, Madina	EGY
Egypt	EGY
Egypt	EGY
Egypt - Cairo	EGY
Egypt / Cairo	EGY
Egypt Cairo	EGY
Egypt Giza	EGY
Egypt _ شرم الشيخ	EGY
Egypt cairo	EGY
Egypt المنصورة	EGY
Egypt مصر	EGY
Egypt, PA	EGY
Egypt. KSA	EGY
El Abiodh Sidi Cheikh	EGY
El Behera, Egypt	EGY
El Daqahlia, Egypt	EGY
El Faioum, Egypt	EGY
El Gharbia, Egypt	EGY
El Mahala	EGY
El MahallaEl Kubra	EGY
El Mansour	EGY
El Mansoura	EGY
El Menia, Egypt	EGY
El Monofia, Egypt	EGY
El Oued	EGY
El Qaliobia, Egypt	EGY
El Sharkia, Egypt	EGY
Elmanzala	EGY
Elminya	EGY
Elsheikh Zayed	EGY
Fakous ,Ash sharqiyah , Egypt	EGY
From Egypt live in Indonesia	EGY
GIZA_EGYPT	EGY
Giza, Egypt	EGY
Giza, Mansoura	EGY
Heliopolis, Cairo	EGY
Hurghada	EGY
Hurghada,Egypt	EGY
Kafr El Shikh, Egypt	EGY
London, England / Cairo,Egypt	EGY
Maadi	EGY
Maadi - Egypt	EGY
Maadi, Cairo, Egypt	EGY
Mansoura	EGY
Mansoura	EGY
Mansoura, Egypt	EGY
Mansoura,Egypt	EGY
Mansoura-egypt	EGY
Matroh, Egypt	EGY
Minya Egypt	EGY
Naga Hamadi,Qena,Egypt	EGY
New Cairo	EGY
New Egypt, NJ	EGY
North Sinai, Egypt	EGY
North Sinai,Alarish	EGY
Nubia	EGY
Nuweiba , Sinai	EGY
October ، benha	EGY
Port Said, Egypt	EGY
Portsaid/Cairo	EGY
Qena, Egypt	EGY
Red Sea, Egypt	EGY
Sheikh Zayed, Giza	EGY
Sohag, Egypt	EGY
Suez, Egypt	EGY
Suez,Egypt	EGY
Tanta	EGY
Tanta	EGY
Tanta, egypt	EGY
alexandria Egypt	EGY
alexandria egypt	EGY
almonofia .Egypt	EGY
banha	EGY
cairo	EGY
cairo , Egypt	EGY
cairo, egypt	EGY
cairo,egypt	EGY
cairo-egypt	EGY
cairo.egypt	EGY
cairo/Jeddah	EGY
dokki	EGY
egypt	EGY
egypt	EGY
egypt , cairo	EGY
egypt cairo	EGY
egypt,alexandria	EGY
giza	EGY
hurghad	EGY
mansoura	EGY
menofiya , egypt	EGY
sharm el-shiekh	EGY
sharm elsheikh south sainai	EGY
أسوان	EGY
أسوان, مصر	EGY
أسيوط, مصر	EGY
أمي مصر	EGY
اسكندرية	EGY
اسكندريه	EGY
اسيوط	EGY
الأسكندرية	EGY
الأسكندرية, مصر	EGY
الإسكندرية	EGY
الإسكندرية	EGY
الإسكندرية مصر	EGY
الإسكندرية.مصر	EGY
الإسماعيلية, مصر	EGY
الاسكندرية	EGY
الاسكندرية	EGY
الاسكندريه	EGY
الاقصر	EGY
البحيرة, مصر	EGY
التليفزيون المصرى	EGY
الثالثه شمال مصنع الرجال	EGY
الجيزة, مصر	EGY
الجيزه	EGY
الدقهلية, مصر	EGY
الدقهليه /طلخا	EGY
السويس	EGY
السويس, مصر	EGY
الشرقية, مصر	EGY
الشيخ زايد	EGY
الغربية, مصر	EGY
الغردقة	EGY
الغردقة مصر	EGY
الغردقة مصر	EGY
الفيوم مصر	EGY
الفيوم, مصر	EGY
القاهرة	EGY
القاهرة	EGY
القاهرة + الاسكندرية	EGY
القاهرة - المعادى	EGY
القاهرة مصر	EGY
القاهرة, شبرا مصر	EGY
القاهرة, مصر	EGY
القاهرة, مصر	EGY
القاهرة, مصر 6October	EGY
القاهرة, مصر/giethoorn holland	EGY
القاهرة- مصر	EGY
القاهرة، مصر	EGY
القاهره	EGY
القاهره مدينه نصر ^ الشروق	EGY
القليوبية, مصر	EGY
اللالالاند اول شارع يمين	EGY
المحله الكبري	EGY
المعادى	EGY
المنصورة	EGY
المنصورة شربين خلف المستشفي العام	EGY
المنصورة_ مصر	EGY
المنصوره	EGY
المنصوره قريه كفر الجنينه	EGY
المنصوره.. السنبلاوين	EGY
المنوفية, مصر	EGY
المنيا, مصر	EGY
الهرم	EGY
ام الدنيا	EGY
ام الدنيا	EGY
بنى سويف, مصر	EGY
بورسعيد	EGY
بورسعيد , مصر	EGY
بورسعيد, مصر	EGY
بورصة كفرالشيخ للاسماك	EGY
بورفؤاد مصر	EGY
ج م ع - القاهره - مصر الجديده	EGY
جمهورية مصر العربية	EGY
جمهورية مصر العربيه	EGY
سوهاج	EGY
سوهاج	EGY
سوهاج, مصر	EGY
سيناء من الشمال للجنوب - مصر	EGY
شرم الشيخ	EGY
صعيدى	EGY
عابدين	EGY
قنا, مصر	EGY
كفر الشيخ	EGY
كفر الشيخ, مصر	EGY
لأقصر، مصر	EGY
مصر	EGY
مصر	EGY
مصر . الاهلى	EGY
مصر .دمياط	EGY
مصر _ الاسكندرية	EGY
مصر أم الدنيا وهتبقى أد الدنيا	EGY
مصر الأقصر مدينة الف باب	EGY
مصر ام الدنيا	EGY
مصر ام الدنيا	EGY
مصر- القاهرة	EGY
مصرى أصيل	EGY
ملوى, مصر	EGY
ميت غمر	EGY
ميت غمر , الدقهليه	EGY
‏Egypt,Cairo	EGY
Eritrea	ERI
Barcelone	ESP
Madrid-Spain	ESP
Andalusia, Spain	ESP
Barcelona, Spain	ESP
Barcelone, Espagne	ESP
Bernabéu	ESP
Camp Nou	ESP
Camp nou	ESP
Gibraltar	ESP
Las Rozas de Madrid, Spain	ESP
Madrid	ESP
Madrid	ESP
Madrid,	ESP
Madrid, Comunidad de Madrid	ESP
Santiago Bernabéu	ESP
Santiago Bernabéu.	ESP
Seville	ESP
Spain	ESP
santiago bernabeu	ESP
برشلونة	ESP
Addis Ababa Ethiopia	ETH
Ethiopia	ETH
Helsinki, Suomi	FIN
Jomala, Finland	FIN
Caen, France	FRA
FRANCE	FRA
France	FRA
Ile-de-France, France	FRA
Montpellier, France	FRA
Mulhouse, France	FRA
PARIS Ile-de-France, France	FRA
Paris	FRA
Paris Madline	FRA
Paris, France	FRA
Paris, Ile-de-France	FRA
Paris, cergy	FRA
Planet EXO	FRA
Saint-Usage, France	FRA
Seine-Saint-Denis	FRA
Strasbourg-France	FRA
france	FRA
باريس	FRA
باريس شارع 14	FRA
باريس، فرنسا	FRA
فرنسا	FRA
موناكو	FRA
Arsenal ..	GBR
Anfield	GBR
Anfield Road - L4	GBR
Barnet, London	GBR
Birmingham, England	GBR
Broadcating house london	GBR
City of London, London	GBR
England	GBR
England, United Kingdom	GBR
Eye, England	GBR
Glasgow, Scotland	GBR
LONDON	GBR
LONDON - UK	GBR
Liverpool	GBR
Liverpool, England	GBR
Liverpool, England L4 Anfield	GBR
London	GBR
London	GBR
London ,UK	GBR
London - UK	GBR
London -UK	GBR
London / UK	GBR
London, England	GBR
London, England ، Andalusia	GBR
London, GB	GBR
London, Ontario	GBR
London, UK	GBR
London, Uk	GBR
London, United Kingdom	GBR
Manchester	GBR
Manchester GB	GBR
Manchester, England	GBR
Northern Ireland, United Kingd	GBR
Old Trafford	GBR
Scotland, United Kingdom	GBR
Sheffield, England	GBR
Shepherd's Bush, London	GBR
Stamford Bridge	GBR
Stamford Bridge, England	GBR
UK	GBR
UK London/USA D.C	GBR
United Kingdom	GBR
london uk	GBR
manchester	GBR
بريطانيا	GBR
لندن	GBR
لندن _ اسطنبول	GBR
لندن المملكة المتحدة	GBR
‏المملكة المتحدة ‏لندن	GBR
Atlanta, GA	GEO
Budapest, Hungary	HUN
Bali, Indonesia	IDN
Jakarta	IDN
Jakarta , Indonesia	IDN
Bangalore , India	IND
الهند	IND
IRAN	IRN
Islamic Republic of Iran	IRN
Tehran, Iran.	IRN
ahvaz	IRN
ahvaz ، iran	IRN
tehran	IRN
إيران/الأهواز	IRN
الجمهورية الإسلامية الإيرانية	IRN
ايران	IRN
بلاد فارس العظمى	IRN
جمهورية الاسلامية ايرانية	IRN
طهران	IRN
عرب آباد Arababad	IRN
Iraq	IRQ
Basra ,Iraq	IRQ
Iraq	IRQ
البصرة Iraq , Basra	IRQ
العراق	IRQ
بغداد	IRQ
بغداد بيتي وبقيت الأرض فندق..	IRQ
بلاد الرافدين	IRQ
سومر, بابل, آشور	IRQ
ميسانIraq	IRQ
1 place beghdad rabat maroc	IRQ
Baghdad	IRQ
Baghdad - Iraq	IRQ
Baghdad, Iraq	IRQ
Baghdad, Iraq	IRQ
Baghdad-Iraq	IRQ
Baghdad. Iraq	IRQ
Basra	IRQ
Dhi Qar lraq	IRQ
Erbil	IRQ
Erbil, Kurdistan Region-Iraq	IRQ
Erbil/kurdistan	IRQ
Great iraq	IRQ
IRAQ	IRQ
IRAQ BAGHDAD	IRQ
IRAQ Baghdad	IRQ
IRAQI - U.A.E	IRQ
IRAQ_DIYALA	IRQ
Iraq	IRQ
Mesopotamia	IRQ
Nasiriyah_Iraq	IRQ
Samarra	IRQ
South_Iraq	IRQ
babylon	IRQ
baghdad.cairo.bairut	IRQ
iraq	IRQ
iraq	IRQ
iraq‏	IRQ
lraq	IRQ
lraq	IRQ
najaf،iarq	IRQ
أربيل، إقليم كوردستان	IRQ
إقليم ألبصرة	IRQ
اربيل - شارع احمدي خاني	IRQ
ارض الحضارات(العـراق)الناصريه	IRQ
اقليم كردستان - دهوك	IRQ
الانبار تدرس التاريخ	IRQ
البصرة العظمى	IRQ
البصرة/العراق	IRQ
البصره	IRQ
العراق	IRQ
العراق	IRQ
العراق	IRQ
العراق - شمال العراقي	IRQ
العراق - بغداد	IRQ
العراق - ديالى	IRQ
العراق - صلاح الدين	IRQ
العراق ... ميسان ... العمارة	IRQ
العراق / النجف	IRQ
العراق iraq	IRQ
العراق البصرة	IRQ
العراق النجف	IRQ
العراق بغداد	IRQ
العراق بلد الحضارات والإنسانية	IRQ
العراق جنوبي الهوى	IRQ
العراق ذي قار ناحية الفهود	IRQ
العراق كربلاء	IRQ
العراق/ البصرة / هور الدملج	IRQ
العراق/ النجف الاشرف	IRQ
العراق/ بابل	IRQ
العراق/ بغداد	IRQ
العراق/البصرة	IRQ
العراق_البصرة	IRQ
العراق_فلسطين	IRQ
العراق|Iraq	IRQ
النجــف الاشــرف	IRQ
النجف	IRQ
النجف الأشرف	IRQ
النجف المقدسة	IRQ
بابل	IRQ
بصرة ،،،الحيانية	IRQ
بغداد	IRQ
بغداد	IRQ
بغداد الحبيبة	IRQ
بغداد الرشيد	IRQ
بغداد الزعفرانيه	IRQ
بغداد العراق	IRQ
بغداد- الاعظمية	IRQ
بغداد- الكاظمية	IRQ
بــغــداد	IRQ
بلاد الرافدين	IRQ
بلد الحسين ومعاوية	IRQ
جمهورية العراق-كربلاء المقدسة	IRQ
جنوب / العراق	IRQ
شمال غرب بغداد	IRQ
عراق علي عراق الحسين	IRQ
عراقي ساكن في قم المقدسة	IRQ
كربلاء	IRQ
كردستان	IRQ
من العراق	IRQ
ميسان العراق	IRQ
وادي الرافدين - بغداد	IRQ
Iraq	IRQ
Iraq	IRQ
Iraq - Baghdad	IRQ
Iraq .	IRQ
Iraq /Baghdad	IRQ
Iraq Al Nasiriya	IRQ
Iraq Baghdad	IRQ
Iraq Fallujah & Baghdad	IRQ
Iraq Najaf Ashraf Governorate	IRQ
Iraq _ Baghdad	IRQ
Iraq العراق العظيم	IRQ
Iraq من عراق علي بن ابي طالب ع	IRQ
Iraq, baghdad	IRQ
Iraq,Babylon	IRQ
Iraq,Mosul	IRQ
Iraq,arbil	IRQ
Iraq,karbala	IRQ
Iraq-Basra	IRQ
Iraquara, Brasil	IRQ
San Siro	ITA
Italia	ITA
Italy	ITA
Milan, Lombardy	ITA
Milano	ITA
Milano, Lombardia	ITA
San Siro	ITA
TORINO ITALIA	ITA
Tuscany, Italy	ITA
Vercelli, Piemonte	ITA
Verona, Veneto	ITA
italiastan	ITA
Amman \ Arabian Gulf	JOR
962	JOR
Amman	JOR
Amman , Jordan	JOR
Amman - Jordan عمان - الاردن	JOR
Amman Jordan	JOR
Amman jordan/Tulkarm Palestine	JOR
Amman, Hashemite Kingdom of Jo	JOR
Amman, Hashemite Kingdom of Jordan	JOR
Amman, Jordan	JOR
Amman, Jordan 11118	JOR
Amman,Jordan	JOR
Amman، Jordan	JOR
Hashemite Kingdom of Jordan	JOR
JORDAN	JOR
Jordan	JOR
Jordan +962795533170	JOR
Jordan - Amman	JOR
Jordan Salt	JOR
Jordan,Amman	JOR
London, England amman,jordan	JOR
amman	JOR
amman,jordan	JOR
jordan	JOR
jordan-amman	JOR
الأردن	JOR
الأردن	JOR
الأردن - عمان	JOR
الأردن، Düsseldorf، ألمانيا	JOR
الاردن	JOR
الاردن - اربد ، Jordn - Irbid	JOR
الاردن - محافظة عمان	JOR
الكرك	JOR
المملكة الأردنية الهاشمية	JOR
المملكة الاردنية الهاشمية	JOR
المملكة الاردنية الهاشمية	JOR
النقب	JOR
عمان	JOR
عمان - الأردن	JOR
محافظة اربد, المملكة الأردنية	JOR
محافظة البلقاء, المملكة الأردن	JOR
محافظة الزرقاء, المملكة الأردن	JOR
محافظة عمان	JOR
محافظة عمان, المملكة الأردنية	JOR
محافظة عمان, المملكة الأردنية	JOR
Fuchu-shi, Tokyo	JPN
Osaka-shi Kita-ku, Osaka	JPN
Tokyo, Japan	JPN
اليابان	JPN
Casablanca-Bruxelles	JUN
Luanda, Kenya	KEN
Nairobi, Kenya	KEN
Seoul, Korea	KOR
KUWAIT	KWT
Leeds , kuwait	KWT
دولة الكويت	KWT
Kuwait	KWT
kuwait	KWT
دولة الكويت الحبيبه	KWT
+ 965 الكويت	KWT
, دولة الكويت	KWT
,دولة الكويت سعد العبدالله	KWT
Al Adailiya, Kuwait	KWT
Al Ahmady, Kuwait	KWT
Al Dasma, Kuwait	KWT
Al Faiha, Kuwait	KWT
Al Farwaniya | portsaid	KWT
Al Farwaniya, Kuwait	KWT
Al Jahra, Kuwait	KWT
Al Khaldiya, Kuwait	KWT
Al Salmiyah, Kuwait	KWT
Al Shamiya, Kuwait	KWT
Al Surra	KWT
Al Surra, Kuwait	KWT
Alkhaldea, Kuwait	KWT
Alkuwait	KWT
Alrawdah - Kuwait	KWT
Hawally, Kuwait	KWT
Hawally, Kuwait 55306625	KWT
KUWAIT	KWT
KUWAITدار العز / FAHAHEEL	KWT
KWT	KWT
Khaitan, Kuwait	KWT
KuwIt	KWT
KuwaiT	KWT
Kuwait	KWT
Kuwait	KWT
Kuwait	KWT
Kuwait & Jordon	KWT
Kuwait - الكويت	KWT
Kuwait _ دولة الكويت	KWT
Kuwait | الكويت	KWT
Kuwait للإعلان 50559145	KWT
Kuwait محمد اليوسفي	KWT
Kuwait, Kuwait City	KWT
Kuwait-France	KWT
Prof. Abdullah AlShayji-Kuwait	KWT
Qortuba, Kuwait	KWT
The Capital, Kuwait	KWT
Torino, Kuwait	KWT
[ Kuwait - الكـــويـــت ]	KWT
kuait	KWT
kuwait	KWT
kuwait - الكويت	KWT
kuwait الله ثم الوطن ثم الأمير	KWT
kuwait-Qurtuba	KWT
kuwait-الكويت	KWT
kuwait.	KWT
kw	KWT
الأندلس, دولة الكويت	KWT
الجهراء, دولة الكويت	KWT
الدسمة	KWT
السالمية	KWT
الشاميه, دولة الكويت	KWT
الشهداء, دولة الكويت	KWT
العاصمة، دولة الكويت	KWT
العاصمه , دولة الكويت	KWT
العاصمه, دولة الكويت	KWT
العديلية, دولة الكويت	KWT
الفنيطيس	KWT
الفيحاء	KWT
الفيحاء نجد الكويت	KWT
الفيحاء, دولة الكويت	KWT
الكويت	KWT
الكويت	KWT
الكويت	KWT
الكويت - السالمية	KWT
الكويت - العاصمة	KWT
الكويت - العمرية	KWT
الكويت - دبي - برشلونه	KWT
الكويت - مدينة صباح الأحمد	KWT
الكويت / لندن	KWT
الكويت ، الجهراء	KWT
الكويت ، المرقاب	KWT
الكويت الأَبيّة الحرة	KWT
الكويت الحبيبه	KWT
الكويت الغاليه	KWT
الكويت بلاد العرب	KWT
الكويت بلدي وليس لي سواها.	KWT
الكويت حرسها الله	KWT
الكويت والعراق	KWT
الكويت وطني وديرتي ومعشوقتي	KWT
الكويت,القبله	KWT
الكويت.. الشامية	KWT
الكويت، الحساب الرسمي الوحيد	KWT
النزهه, دولة الكويت	KWT
النهضة - دولة الكويت	KWT
جنوب السرة , دولة الكويت	KWT
دولة الكويت	KWT
دولة الكويت	KWT
دولة الكويت محرر صحفي	KWT
دولة الكويت - الدعية	KWT
دولة الكويت kuwait	KWT
دولة الكويت القصر الأحمر	KWT
فهد الاحمد, دولة الكويت	KWT
كلية الحقوق جامعة الكويت	KWT
كويت	KWT
كويت	KWT
محـطـة جبــلة والمرقــاب	KWT
مدونة الكــويت ثـم الكــويت	KWT
منطقة الشويخ الحرة قطعة A	KWT
Daraya, mount lebanon	LBN
Adma, Lebanon	LBN
Adma-Lebanon	LBN
Ashrafieh-Beirut 100.5 FM	LBN
Batroun	LBN
Beirut	LBN
Beirut - Cairo	LBN
Beirut - Lebanon	LBN
Beirut Lebanon	LBN
Beirut lebanon	LBN
Beirut, Lebanon	LBN
Beyrouth- Liban	LBN
BintJbeil, South Lebanon	LBN
Dbayeh - Lebanon	LBN
Dekwaneh	LBN
Doha, Beirut	LBN
Downtown - Beirut - Lebanon	LBN
LEBANON \ BEIRUT	LBN
Leb.	LBN
Lebanon	LBN
Lebanon	LBN
Lebanon - Saida	LBN
Lebanon Nabatiyeh	LBN
Lebanon, Nh	LBN
Lebanon- Tyre	LBN
Lebanon. Global	LBN
Lebaon	LBN
Machgarah - Ain El Tineh Road	LBN
Mount Lebanon, PA	LBN
Naccache, Lebanon	LBN
Saida	LBN
South Lebanon, OH	LBN
beirut	LBN
beirut - lebanon	LBN
beirut lebanon	LBN
beirut.lb	LBN
lebanon	LBN
lebanon - Beirut	LBN
lebanon /beirut	LBN
lebanon beirut	LBN
lebanon, Beirut	LBN
lebanon, france	LBN
lebanon-tripoli	LBN
الحازمية Hazmieh	LBN
الضاحية الجنوبية_لبنان	LBN
بعلبك	LBN
بعلبك	LBN
بيروت	LBN
بيروت لبنان	LBN
بيروت لضاحيه لجنوبيه	LBN
بيروت، لبنان.	LBN
جنوب لبنان	LBN
جنوب لبنان civil defense	LBN
جنوب لبنان ارض العزة والاباء	LBN
جنوب لبنان المحرر	LBN
صيدا ـ لبنان	LBN
طرابلس لبنان	LBN
لبنان	LBN
لبنان .طرابلس	LBN
لبنان _بيروت	LBN
لبنان | بيروت	LBN
لبنان المقاومة	LBN
لبنان مدينة صور/ قانا	LBN
لبنان-بيروت	LBN
لبنان، جبل عامل	LBN
بنغازي العصية...ليبيا ..	LBY
Ajdabiya, Libya	LBY
Ash Shatt St, Tripoli	LBY
BENGHAZI	LBY
Bani Walid, Libya	LBY
Benghazi	LBY
Derna -Libya	LBY
Libya	LBY
Libya	LBY
Libya Bingazi	LBY
Libya benghazi	LBY
Libya الزاوية	LBY
Libya,Turkey and USA	LBY
Libya/Derna	LBY
Libya/tripoli	LBY
Tajoura - Tripoli	LBY
Tripoli	LBY
Tripoli - Libya	LBY
Tripoli Libya	LBY
Tripoli,libya	LBY
libya - benghazi	LBY
البيضاء	LBY
البيضاء _برقة .	LBY
بنغازي	LBY
بنغازي ( ليبيا )	LBY
بنغازي- ليبيا	LBY
سرت	LBY
طرابلس	LBY
طرابلس - ليبيا	LBY
طرابلس _ليبيا	LBY
ليبيا	LBY
Colombo, Sri Lanka	LKA
Rabat morroco	MAR
Casablanca, Maroc	MAR
MOROCCO	MAR
AZILAL/ MAROC	MAR
Africa Western Sahara	MAR
Agadir	MAR
Agadir, Royaume du Maroc	MAR
Agdal Riyad, Royaume du Maroc	MAR
CASABLANCA	MAR
Casablanca	MAR
Dcheira El Jihadia, Royaume du	MAR
El-Aaiùn, Western Sahara	MAR
Fes CIty	MAR
Grand Casablanca, Morocco	MAR
Grand Casablanca, Royaume du M	MAR
Grand Casablanca, Royaume du Maroc	MAR
Gueliz, Royaume du Maroc	MAR
Guelmim - Es Semara, Royaume d	MAR
Kenitra	MAR
Khouribga, Royaume du Maroc	MAR
Larache, Royaume du Maroc	MAR
Laâyoune-Boujdour-SakiaElHamra	MAR
Laâyoune.marruecos	MAR
MAROC	MAR
MOROCCO	MAR
Maroc	MAR
Maroc, Afrique	MAR
Maroc-Rabat	MAR
Marrakech	MAR
Marrakech Médina, Royaume du M	MAR
Marrakesh	MAR
Marrakesh Medina, Morocco	MAR
Marrakesh-Tensift-El Haouz, Mo	MAR
Meknes, Morocco	MAR
Meknès. Maroc	MAR
Morocco	MAR
Nador, Royaume du Maroc	MAR
Oujda, Royaume du Maroc	MAR
Rabat	MAR
Rabat - Salé - Zemmour - Zaër	MAR
Rabat - Salé - Zemmour - Zaër,	MAR
Rabat, Maroc	MAR
Rabat, Rabat - Salé - Zemmour	MAR
Rabat-Morocco-	MAR
Royaume du Maroc	MAR
Royaume du Maroc	MAR
Safi, Royaume du Maroc	MAR
Tanger	MAR
Tanger - Tétouan, Royaume du M	MAR
Tanger Médina, Royaume du Maro	MAR
Tanger طنجة	MAR
Tanger, Maroc	MAR
Taza	MAR
Tiznit, Royaume du Maroc	MAR
Tétouan, Royaume du Maroc	MAR
Zaouiat Sidi Abdelkader, Royau	MAR
casablanca	MAR
maroc	MAR
rabat Maroc	MAR
tangier	MAR
الدار البيضاء	MAR
الرباط	MAR
الرباط- المغرب	MAR
الصحراء الشرقية المغربية	MAR
العيون	MAR
العيون المملكة المغربية لي هوك	MAR
العيون،المملكة المغربية	MAR
المغرب	MAR
المغرب Maroc	MAR
المغرب الإسلامي	MAR
المغرب الدار البيضاء	MAR
المملكة المغربية	MAR
المملكة المغربية	MAR
المَغْرِبُ العَرَبي	MAR
بركان المغرب	MAR
شفشاون	MAR
مراكش	MAR
مغرب الاقصى .	MAR
مغربي و أفتخر	MAR
Casablanca, Maroc	MAY
الدار البيضاء المملكة المغربية	MAY
Metepec, México	MEX
Bamako	MLI
Republic of Mozambique	MOZ
Mauritania	MRT
Tevrag-zeina	MRT
الطينطان	MRT
موريتانيا	MRT
نواكشوط	MRT
Kuala Lumpur City	MYS
Malaysia	MYS
South Holland, The Netherlands	NED
The Hague, The Netherlands	NED
The Netherlands	NED
هولندا	NED
Niger Niamey	NER
Gana, Nigeria	NGA
Nigeria	NGA
Amsterdam, Nederland	NLD
Rotterdam	NLD
Amsterdam, Nederland	NLD
Amsterdam, Netherlands	NLD
Amsterdam, The Netherlands	NLD
Den Haag, Nederland	NLD
Haarlem, Nederland	NLD
Nederland_Zwolle	NLD
Norway	NOR
Oslo, Norway	NOR
النرويج	NOR
نيوزيلاندا	NZL
OMAN. مسقط, سلطنة عمان	OMN
Oman	OMN
سلطنة عمان	OMN
سلطنة عمان إبراء	OMN
Al Seeb, Oman	OMN
As Suwayq, Oman	OMN
Barka Oman	OMN
Barka, Oman	OMN
Dhofar, Oman	OMN
Khasab, Oman	OMN
Muscat, Oman	OMN
Muscat, Omanه	OMN
Muscat. Oman	OMN
OMAN	OMN
Oman	OMN
Oman	OMN
Oman - Muscat	OMN
Salalah, Oman	OMN
Shinas, Oman	OMN
Sultanate of Oman	OMN
Sur, Oman	OMN
muscat	OMN
البريمي, سلطنة عمان	OMN
السويق , سلطنة عمان	OMN
السيب, سلطنة عمان	OMN
الظاهرة, سلطنة عمان	OMN
المصنعة, سلطنة عمان	OMN
سلطنة عمان	OMN
سلطنة عمان . مسقط	OMN
سلطنة عُمان	OMN
سلطنة عُمان. ....صور العفيه	OMN
سلطنةعمان	OMN
سلطنه عمان	OMN
صحار, سلطنة عمان	OMN
صلالة, سلطنة عمان	OMN
صور, سلطنة عمان	OMN
طاقة_سلطنة عمان	OMN
عُمان	OMN
مسقط	OMN
مسقط	OMN
مسقط ـ سلطنة عُمان	OMN
مسقط, سلطنة عمان	OMN
مسقط, سلطنة عُمان	OMN
Pakistan	PAK
Tanta, Peru	PER
مانيلا الفلبين	PHL
بولندا	POL
Lisbonne, Portugal	PRT
Portugal	PRT
Palestine	PSE
جنين	PSE
غزة	PSE
قطاع غزة - جوال/0097252400570	PSE
#Gaza #Palestine	PSE
#Palestine	PSE
#فلسطين_قضيتي #غزة_العزة	PSE
AL Jahra - Palestine	PSE
Al Quds, Palestine	PSE
Anabta, عنبتا, Palestine	PSE
Canaan — HolyLand — Palestine	PSE
Gaza	PSE
Gaza , Palestine	PSE
Gaza - Palestine	PSE
Gaza ..	PSE
Gaza غزة	PSE
Gaza, Palestine	PSE
Gaza.Rafah	PSE
Gaza/Palestine	PSE
GazaStrip	PSE
Hebron	PSE
Hebron,west bank	PSE
Jerusalem	PSE
Jerusalem, Israel	PSE
Nablus	PSE
Palestine	PSE
Palestine	PSE
Palestine - فلسطين	PSE
Palestine - Gaza	PSE
Palestine - Gaza	PSE
Palestine - Gaza غزة فلسطين	PSE
Palestine - Gazze	PSE
Palestine . Gaza	PSE
Palestine Gaza	PSE
Palestine Gaza	PSE
Palestine – Gaza	PSE
Palestine, Gaza	PSE
Palestine, Ramallah	PSE
Palestine, TX	PSE
Palestine.Gaza	PSE
Yaffa palestine	PSE
gaza	PSE
jerusalem	PSE
nablus	PSE
palestine	PSE
palestine, Gaza	PSE
palestine,gaza	PSE
palstine-Gaza	PSE
ارض الزيتون	PSE
الأراضي الفلسطينية	PSE
الضفة الغربية	PSE
الضفه الشرقيه ||	PSE
القدس	PSE
القدس الشريف	PSE
القدس المحتلة	PSE
القدس عاصمة فلسطين الأبدية	PSE
ام الفحم فلسطين المحتله	PSE
بلاد العُرب وطني والقدس عاصمتي	PSE
بيت المقدس	PSE
بيت لحم	PSE
حيفا فلسطين	PSE
خانيونس - قطاع غزة	PSE
خليص, المملكة العربية السعودية	PSE
رام الله - فلسطين	PSE
سخنين/فلسطين 48	PSE
غزة	PSE
غزة	PSE
غزة - فلسطين	PSE
غزة - فلسطين , Gaza -Palestine	PSE
غزة _ فلسطين	PSE
غزة gaza	PSE
غزة مخيم جباليا	PSE
غزه -فلسطين جامعهOntario	PSE
فلسطين	PSE
فلسطين	PSE
فلسطين - غزة	PSE
فلسطين /غزة	PSE
فلسطين _ غزة	PSE
فلسطين المحتلة	PSE
فلسطين المحتلة - قطاع غزة	PSE
فلسطين المحررة	PSE
فلسطين وجهتنا- غزة ارضنا	PSE
فلسطين, البصَّة قضاء عكَّا	PSE
فلسطين- غزة	PSE
فلسطين- قطاع غزة	PSE
فلسطين-غزة	PSE
فلسطين_ غزة / Palestine_ Gaza	PSE
فلسطين_غزة	PSE
فلسطين|palestine	PSE
فلسطين، قطاع غزة ،هاشم	PSE
فلسطيني من غزة	PSE
فِلَسطينُ المُحتلَّة	PSE
قطاع غزة - فلسطين	PSE
قلقيلية-فلسطين	PSE
معكم من كل فلسطين27.027 kmمربع	PSE
نخبة المشاة _غزة	PSE
‎غزة- شارع الجامعة- برج الرؤيا	PSE
كعبة المضيوم/ قطر ..	QAT
Al Jazeera Documentary Channel	QAT
Al Rayyan, Qatar	QAT
Doha	QAT
Doha - Qatar	QAT
Doha, Qatar	QAT
Doha.Qatar	QAT
Lusail Stadium ،Doha,Qatar	QAT
Lusail, Qatar	QAT
QATAR	QAT
Qatar	QAT
Qatar	QAT
Qatar - Aljasra	QAT
Qatar - Doha	QAT
Qatar - قــــــطــــر	QAT
Qatar, Doha	QAT
Umm Salal, Qatar	QAT
doha	QAT
doha- qater	QAT
lusail	QAT
qatar	QAT
qatar	QAT
أم صلال, دولة قطر	QAT
الخور, دولة قطر	QAT
الدوحة	QAT
الدوحة - قطر	QAT
الدوحة, دولة قطر	QAT
الدوحة، قطر	QAT
الدوحه - الريان	QAT
الدوحه - قطر	QAT
الريان, دولة قطر	QAT
الضعاين, دولة قطر	QAT
دولة قطر	QAT
في ارض المونديال	QAT
قطر	QAT
قطر	QAT
كتارا _ مبنى 28 _ مجلس الشعر	QAT
كعبة المضيوم , دولة قطر	QAT
نبضي قطر	QAT
Romania	ROU
Belgorod, Russia	RUS
Moscow	RUS
Moscow Russia	RUS
Moscow, Russia	RUS
Moscow-Russia	RUS
Russia	RUS
Russia	RUS
Russia , Moscow	RUS
Russia - Saint Petersburg	RUS
Russia __ Moscow	RUS
Russia, OH	RUS
Saint Petersburg, Russia	RUS
moscow . russia	RUS
moscow,Russia	RUS
voronezh	RUS
الشيشان	RUS
عابر سبيل KSA	SAU
للإعلان 0558228601- واتس	SAU
الرياض	SAU
(جده)	SAU
Saudi Arabia	SAU
الرياض	SAU
الرياض	SAU
السعودية	SAU
السعودية - الرياض	SAU
السعودية قلب العالم الإسلامي	SAU
السعودية( حرسها الله )	SAU
العويقيلة	SAU
المدينةالمنورة	SAU
المملكة العربية السعودية	SAU
المملكة العربية السعودية	SAU
المملكة العربية السعودية نجد	SAU
نجد	SAU
#Africa #UK #Saudia	SAU
#الخاص_مهمل NEOM نيوم	SAU
#الزلفي	SAU
#السعودية_العظمى	SAU
#السعودية_العظمى	SAU
#المملكة_العربية_السعودية	SAU
#المنطقة_الشرقية	SAU
#جازان #صحافة_وإعلام	SAU
#جده	SAU
#حايل	SAU
#متصدر_لا_تكلمني #السعودية	SAU
(المملكة العربية السعودية)	SAU
(للاعلانات واتسآب): 0530228899	SAU
***/المملكه العربيه السعوديه	SAU
966	SAU
+966562107771 واتساب فقط	SAU
, المملكة العربية السعودي	SAU
0501155643 للمواعيد	SAU
591654949	SAU
@AlNassrFC	SAU
ABHA	SAU
ALNAJJAR CLINIC +965 97666917	SAU
Abha, Kingdom of Saudi Arabia	SAU
Abha-Saudi Arabia	SAU
Ahad Rufaidah,Aseer.	SAU
Ahd Rafidah	SAU
Ahsa, Kingdom of Saudi Arabia	SAU
Al Ahsa, Saudi Arabiahcci	SAU
Al Jubayla	SAU
Al Kharj , Los Angeles	SAU
Al Khobar	SAU
Al Khobar	SAU
Al Madinah Al Munawwarah	SAU
Al Madinah Al Munawwarah, King	SAU
Al-Khobar	SAU
Arabia Saudita	SAU
Asir, Kingdom of Saudi Arabia	SAU
Baysh, Kingdom of Saudi Arabia	SAU
Buraydah	SAU
DAMMAM	SAU
DaMMaM	SAU
Dammam	SAU
Dammam, Eastern	SAU
Dammam, Saudi Arabia	SAU
Dhahran	SAU
Dhahran, Saudi Arabia	SAU
Great Saudi Arabia	SAU
Hafr Al Batin	SAU
Hail	SAU
Hail, Kingdom of Saudi Arabia	SAU
JED	SAU
Jazan, Kingdom of Saudi Arabia	SAU
Jed - La Boca 18/12	SAU
Jeddah	SAU
Jeddah	SAU
Jeddah - Saudi Arabia	SAU
Jeddah - Saudi Arabia	SAU
Jeddah KSA	SAU
Jeddah | Dubai	SAU
Jeddah, Kingdom of Saudi Arabi	SAU
Jeddah, Kingdom of Saudi Arabia	SAU
Jeddah, Saudi Arabia	SAU
Jubail Ind. City	SAU
Jubail, Kingdom of Saudi Arabi	SAU
K S A	SAU
K.S.A	SAU
K.S.A. Jeddah	SAU
KSA	SAU
KSA - AL KHOBAR	SAU
KSA - Buraydah City	SAU
KSA-Jazan	SAU
KSA. Riyadh	SAU
KSA. Riyadh	SAU
Khamis Moshat	SAU
Khobar	SAU
Khobar،ksa,Old Trafford	SAU
Kingdom Saudi Arabia	SAU
Kingdom of Saudi Arabia	SAU
Kingdom of Saudi Arabia Jeddah	SAU
Ksa	SAU
Madinah	SAU
Makkah	SAU
Makkah	SAU
Makkah Al Mukarrama	SAU
Makkah Al Mukarrama, Kingdom of Saudi Arabia	SAU
Makkha	SAU
NY & Geneva & Riyadh	SAU
Riyad, Royaume d'Arabie Saoudi	SAU
Riyadh	SAU
Riyadh	SAU
Riyadh	SAU
Riyadh #السعوديه_العظمى	SAU
Riyadh , Saudi Arabia	SAU
Riyadh - Beirut	SAU
Riyadh - Great Saudi	SAU
Riyadh - Ottawa	SAU
Riyadh - Shaqra	SAU
Riyadh / Washington DC	SAU
Riyadh K S A	SAU
Riyadh Kingdom of Saudi Arabia	SAU
Riyadh ksa	SAU
Riyadh ، khobar	SAU
Riyadh,	SAU
Riyadh, KSA	SAU
Riyadh, Kingdom of Saudi Arabi	SAU
Riyadh, Kingdom of Saudi Arabia	SAU
Riyadh, Saudi Arabia	SAU
Riyadh, Saudi Arabia	SAU
Riyadh,Jeddah,Al-Khobar	SAU
Riyadh,KSA/DUBAI khalifa tower	SAU
Riyadh,Saudi Arabia	SAU
Riyadh,kingdom of saudi arabia	SAU
Riyadh- KSA	SAU
Riyadh-KSA	SAU
SA	SAU
SAUDI	SAU
SAUDI ARABIA-KSA	SAU
Saudi Arabia	SAU
Saudi Arabia	SAU
Saudi Arabia	SAU
Saudi Arabia , Jeddah	SAU
Saudi Arabia , Riyadh	SAU
Saudi Arabia - Afif	SAU
Saudi Arabia - Hafralbatin	SAU
Saudi Arabia - Khobar	SAU
Saudi Arabia - Riyadh	SAU
Saudi Arabia - Riyadh - ksa	SAU
Saudi Arabia Kingdom- AlJubail	SAU
Saudi Arabia ، Riyadh	SAU
Saudi Arabia, Riyadh	SAU
Saudi Arabia. Khobarالخبر	SAU
Saudi Arabia/ Egypt	SAU
Saudi Arabia/السعودية	SAU
Saudi arabia	SAU
Sihat, Kingdom of Saudi Arabia	SAU
Tabuk	SAU
Tabuk	SAU
Tabuk, Kingdom of Saudi Arabia	SAU
Tabuk. amlij .Saudi Arabia	SAU
Taif - Jeddah	SAU
Taif, Kingdom of Saudi Arabia	SAU
Yanb3	SAU
Yanbu Industrial City	SAU
alkhobar	SAU
alriyadh	SAU
from Jeddah with love	SAU
jazan, saudi Arabia	SAU
jed	SAU
jeddah	SAU
jeddah - alhamdanyah	SAU
jeddah SA	SAU
khobar ksa	SAU
ksa	SAU
ksa - AlAhsa	SAU
ksa - Riyadh	SAU
riyadh	SAU
riyadh saudi arabea	SAU
riyadh .. paris	SAU
riyadh principality	SAU
saudi - alkhobar	SAU
saudi Arabia	SAU
saudi arabia	SAU
saudi arabia jeddah	SAU
saudia	SAU
أبها	SAU
أبها	SAU
إلطايف المملكة العربية السعودي	SAU
االمملكة العربية السعوديه	SAU
ابها	SAU
ابها .. عسير .. (بني مغيد)	SAU
ابها, المملكة العربية السعودية	SAU
ابها, عسير	SAU
اطهر بقاع الأرض مكة المكرمة	SAU
الأحساء	SAU
الأحساء	SAU
الاحساء	SAU
الاحساء الحبيبة	SAU
الاحساء, المملكة العربية السعودية	SAU
الباحة	SAU
الباحة, المملكة العربية السعود	SAU
الباحة،المملكةالعربيه السعوديه	SAU
البكيرية, السعودية	SAU
الجبيل	SAU
الجبيل	SAU
الجبيل ... السعودية	SAU
الجبيلة	SAU
الجوف, المملكة العربية السعودي	SAU
الحرمين	SAU
الخبر	SAU
الخبر	SAU
الخبر ، الدمام	SAU
الخبر المملكة العربية السعودية	SAU
الخرج	SAU
الخرجّ	SAU
الخُبر لاس فيغاس	SAU
الدمام	SAU
الدمام	SAU
الدمام, المملكة العربية السعود	SAU
الدمام, المملكة العربية السعودية	SAU
الرس, القصيم	SAU
الرياض	SAU
الرياض	SAU
الرياض - اشيقر - وهبي تميمي	SAU
الرياض - الحائر - رماح	SAU
الرياض - السعوديه	SAU
الرياض - جدة	SAU
الرياض - حوطة بني تميم	SAU
الرياض - حي الندى، شارع عثمان	SAU
الرياض - ضاحية لبن	SAU
الرياض -القصيم -جده	SAU
الرياض .	SAU
الرياض Saudi Arabia	SAU
الرياض _ الدلم	SAU
الرياض السعودية	SAU
الرياض السعوديه	SAU
الرياض المملكة العربية السعودي	SAU
الرياض المملكةالعربية السعودية	SAU
الرياض,	SAU
الرياض, السعودية	SAU
الرياض, السعودية	SAU
الرياض, المملكة العربية السعود	SAU
الرياض, المملكة العربية السعودية	SAU
الرياض, المملكة عربية السعودية	SAU
الرياض,المملكةالعربيةالسعودية	SAU
الرياض. المدينة المنورة	SAU
الرياض..المملكةالعربيةالسعودية	SAU
الرياض.KSA	SAU
الرياض/واشنطن	SAU
الرياض، المملكة العربية السعود	SAU
الرياض، شقراء، المشاش- فبراير	SAU
الساحل الغربي	SAU
السعـ KSA الأحساء ـودية	SAU
السعـودية العظمى	SAU
السعودية	SAU
السعودية	SAU
السعودية حساب إخباري	SAU
السعودية - حائل	SAU
السعودية / المدينة المنورة	SAU
السعودية (رياض العز والشموخ)	SAU
السعودية ,الخبر	SAU
السعودية - الرياض	SAU
السعودية - الرياض - حي الصحافة	SAU
السعودية - القطيف	SAU
السعودية - عسير - محافظة طريب	SAU
السعودية - مكة المكرمة.	SAU
السعودية . الرياض	SAU
السعودية / الجبيل الصناعية	SAU
السعودية Saudi Arabia	SAU
السعودية _ تبوك	SAU
السعودية أينما اتجهت وطن	SAU
السعودية العظمى	SAU
السعودية العظمى	SAU
السعودية العظمى KSA	SAU
السعودية العظمى _ الدوادمي	SAU
السعودية العُظمى	SAU
السعودية- الرياض	SAU
السعودية_	SAU
السعوديه	SAU
السعوديه ،، الدمام	SAU
السعوديه العظمى	SAU
السعوديه العظمى	SAU
السعوديه العظمي	SAU
السعوديه جده	SAU
السعوديه مدينة الخبر	SAU
السعوديه, المنطقه الشرقيه	SAU
السليل	SAU
الشرقي, المملكة العربية السعود	SAU
الشرقي, المملكة العربية السعودية	SAU
الشرقية, المملكة العربية السعودية	SAU
الشرقيه السعودية العضمى	SAU
الشمال, المملكة العربية السعودية	SAU
الصمان	SAU
الطائف	SAU
الطائف ـ الرميدة	SAU
الطائف,	SAU
الطائف, السعودية	SAU
الطائف, المملكة العربية السعود	SAU
الطائف, المملكة العربية السعودية	SAU
الطائف, مكة المكرمة	SAU
الطائف.	SAU
الظهران	SAU
العلا	SAU
العيص	SAU
العيص-المملكة العربية السعودية	SAU
القاعد ،، حائل	SAU
القريات,	SAU
القصيم	SAU
القصيم ~ بريدة	SAU
القصيم لمملكة العربية السعودية	SAU
القصيم, المملكة العربية السعود	SAU
القويعية	SAU
القيصومة	SAU
المجمعة	SAU
المخواة	SAU
المدينة المن	SAU
المدينة المن, السيح	SAU
المدينة المن, المملكة العربية	SAU
المدينة المن, المملكة العربية السعودية	SAU
المدينة المنورة	SAU
المدينة المنورة	SAU
المدينة المنورة - تبوك	SAU
المدينة المنورة - محافظات مصر	SAU
المدينة المنورة .. ينبع .. جدة	SAU
المدينة المنورة _الرياض	SAU
المدينة المنورة, السعودية	SAU
المدينة المنورة, المملكة العرب	SAU
المدينة المنورة, المملكة العربية السعودية	SAU
المدينة المنوره	SAU
المدينة المنوره السعوديه	SAU
المدينه	SAU
المدينه المنورة	SAU
المزاحمية	SAU
المملكة العربية	SAU
المملكة العربية السعودية	SAU
المملكة العربية السعودية	SAU
المملكة العربية السعودية I	SAU
المملكة العربية السعودية - جدة	SAU
المملكة العربية السعودية بريده	SAU
المملكة العربية السعودية تبوك	SAU
المملكة العربية السعودية حائل	SAU
المملكة العربية السعودية مكة	SAU
المملكة العربية السعودية,نجران	SAU
المملكة العربية السعودية.ابها	SAU
المملكة العربية السعودية.جدة	SAU
المملكة العربيةالسعودية	SAU
المملكةالعربيةالسعودية	SAU
المملكه العربية السعودية	SAU
المملكه العربية السعودية	SAU
المملكه العربية السعودية جدة	SAU
المملكه العربيه السعوديه	SAU
المملكه العربيه السعوديه	SAU
المنطقة الشرقية	SAU
المنطقة الشرقية -الدمام	SAU
المنطقة الشرقية/الرياض/الجنوب	SAU
المنطقه الشرقيه	SAU
املج, المملكة العربية السعودية	SAU
بدر حنين	SAU
بريدة	SAU
بريدة, المملكة العربية السعودية	SAU
بلاد الحرمين	SAU
بلاد الحرمين	SAU
بلاد الحرمين الشريفين	SAU
بنت العُلا أرض الجبال.	SAU
بيشة	SAU
بيشة, المملكة العربية السعودية	SAU
تبوك	SAU
تبوك مروج الامير 47315، ‏	SAU
تبوك, المملكة العربية السعودية	SAU
تيماء, السعوديه	SAU
جازان	SAU
جازان - المملكه العربيه السعوديه	SAU
جازان - صبيا	SAU
جازان, المملكة العربية السعودي	SAU
جازان, المملكة العربية السعودية	SAU
جامعة طيبة-كلية التربية	SAU
جدة	SAU
جدة	SAU
جدة - السعودية	SAU
جدة -المملكة العربية السعودية	SAU
جدة -حي الروضة -شارع حسن عواد	SAU
جدة / الرياض / السعودية	SAU
جدة, السعودية العظمى	SAU
جدة, المملكة العربية السعودية	SAU
جدة, المملكة العربية السعودية	SAU
جدة, المنار 3 ش ابي المظالف	SAU
جدة, مكة المكرمة	SAU
جدة/ السعودية	SAU
جدة،أرض الحالمين.	SAU
جده	SAU
جده	SAU
جده / جيزان	SAU
جده المملكه العربيه السعوديه	SAU
جده المملكه العربيه السعوديه	SAU
جده عروس البحر الأحمر	SAU
جده ف ديار خلي	SAU
جزر فرسان 1, المملكة العربية ا	SAU
حائل, المملكة العربية السعودية	SAU
حائل, بعد حيي	SAU
حايل	SAU
حبونا, المملكة العربية السعودي	SAU
دار آل سعُود السعوديه العظمى	SAU
دومة الجندل, الجوف	SAU
رياض المملكة العربية السعودية	SAU
سيهات, المملكة العربية السعودي	SAU
شقراء || الرياض	SAU
صفوى, المملكة العربية السعودية	SAU
طنايا	SAU
عرعر, المملكة العربية السعودية	SAU
عسير	SAU
عسير, المملكة العربية السعودية	SAU
عنيزة - الرياض	SAU
عنيزة, المملكة العربية السعودية	SAU
في الديوان - السعودية	SAU
في قلب الرياض الحبيبه	SAU
قارة السعودية العُظمى	SAU
للتواصل وآتس آب 00966537096966	SAU
محافظة #الخرج	SAU
محافظة الحُرث	SAU
محافظة الزلفي	SAU
محافظة القريات	SAU
محافظة طريف	SAU
محايل	SAU
محايل عسير	SAU
محايل, المملكة العربية السعودية	SAU
مدينة الرياض	SAU
مدينة رسول الله صلى الله عليه	SAU
مرسول بارك | Marsol bark	SAU
مع السعودية بمختلف الأحوال	SAU
مكة	SAU
مكة المكرمة	SAU
مكة المكرمة	SAU
مكة المكرمة .	SAU
مكة المكرمة الزاهر	SAU
مكة المكرمة, السعوديه	SAU
مكة المكرمة, المملكة العربية ا	SAU
مكة المكرمة, المملكة العربية السعودية	SAU
مكة المكرمة/ الطايف	SAU
مكة المملكة العربية السعودية	SAU
مكه	SAU
مملكة العربية السعودية.الرياض	SAU
مملكة العز KSA	SAU
منطقة الجوف_ محافظة القريات	SAU
منطقة مكة المكرمة محافظة جدة	SAU
مهد الذهب, المملكة العربية السعودية	SAU
نجد	SAU
نجد شمر	SAU
نجد العذيه	SAU
نجران	SAU
نصراوي - الرياض	SAU
نيوم neom	SAU
وادي الدواسر	SAU
وادي قديد	SAU
ينبع	SAU
ينبع, المملكة العربية السعودية	SAU
‏Kingdom of Saudi Arabia	SAU
‏المدينة المنورة	SAU
‏المملكة العربية السعودية	SAU
‏مدينة الطائف	SAU
Kassala, Sudan	SDN
Khartoum	SDN
Khartoum	SDN
Khartoum , Juba	SDN
Khartoum North	SDN
Khartoum North, Sudan	SDN
Khartoum sudan	SDN
Khartoum, Sudan	SDN
Khartoum, sudan	SDN
Khartoum- SUDAN	SDN
London ، الخرطوم	SDN
Omdurman, Sudan	SDN
Port-Sudan	SDN
Port-Sudan, Sudan	SDN
Shendi, Sudan	SDN
South Sudan	SDN
Sudan	SDN
Sudan - Khartoum - Omdurman	SDN
Sudan, Qatar & Canada	SDN
USA - SUDAN	SDN
khartoum	SDN
khartoum - Sudan	SDN
khartoum - sudan	SDN
sudan	SDN
sudan	SDN
sudan khartoum	SDN
اتحاد مغردي السودان	SDN
الخرطوم	SDN
الخرطوم ، السودان	SDN
الخرطوم_بحري	SDN
السودان	SDN
السودان	SDN
السودان - الخرطوم - ام درمان	SDN
السودان ولاية غرب دارفور	SDN
السودان- الخرطوم-السجانة	SDN
السودان-الخرطوم	SDN
السودان.. الخرطوم	SDN
السودان_الخرطوم	SDN
كسلا - السودان	SDN
EIRGAVO	SOM
Mogadishu, Somalia	SOM
Mogadishu,Somalia	SOM
الصومال	SOM
Gothenburg, Sweden	SWE
Stockholm, Sverige	SWE
Stockholm, Sweden	SWE
Sverige	SWE
Sweden	SWE
Syria Al-Rukban camp	SYR
الجولان _ Golan	SYR
#syria . lattakia	SYR
#الشمال_السوري	SYR
Afrin	SYR
Aleppo, Syria	SYR
Damascus	SYR
Damascus - Syria	SYR
Damascus _ Syria	SYR
Damascus, OR	SYR
Free Syria	SYR
Idleb-Syria	SYR
Idlib Syria	SYR
SYRIA	SYR
Syria	SYR
Syria	SYR
Syria (Idlib)	SYR
Syria - Damascus	SYR
Syria Idlib	SYR
Syria,idlib	SYR
Syria- Damascus	SYR
Syria_Idleb	SYR
Syrian Arab Republic	SYR
Syrian Arab Republic Lattakia	SYR
daraa syria	SYR
roj ava syria	SYR
syria	SYR
tabqah syria	SYR
إدلب ،سوريا	SYR
إدلب الحرة	SYR
الجمهورية العربية السورية	SYR
الجمهورية العربية السورية	SYR
الشمال السوري	SYR
اللاذقية	SYR
بلاد الشام	SYR
بلاد الشام ، سوريا ، الباب ،	SYR
حلب	SYR
حلب مارع	SYR
حلب_اعزاز	SYR
حماه بوابة الحرية	SYR
دمشق	SYR
سوريا	SYR
سوريا - حلب	SYR
سوريا - حمص	SYR
سوريا . ريف دمشق . الزبداني	SYR
سوريا .حماة	SYR
سوريا _ حماة _ اللطامنة	SYR
سوريا ادلب نازح بريف حلب الباب	SYR
سوريا حماه الريف الشمالي	SYR
سوريا حمص	SYR
سوريا دير الزور	SYR
سوريا.ادلب	SYR
سورية	SYR
سورية طرطوس	SYR
محرر السوري	SYR
مدينة اعزاز	SYR
معرة النعمان	SYR
من مدينة ديرالزور	SYR
Ndjamena.Chad	TCD
N'DJAMENA Tchad	TCD
chad	TCD
Tunis ®	TUN
Carthage - Tunis	TUN
METLAOUI	TUN
Sousse Tunisie	TUN
TUNIS	TUN
TUNISIA	TUN
TUNISIE	TUN
Tunis	TUN
Tunis - Qatar	TUN
Tunis _Zaghouan	TUN
Tunis/Saham	TUN
TunisIa- UK	TUN
Tunisi	TUN
Tunisia	TUN
Tunisia	TUN
Tunisia- Kuwait- Doha- Tunis	TUN
Tunisia...تونس الخضراء	TUN
Tunisie	TUN
tunise	TUN
tunisie	TUN
تونس	TUN
تونس - Tunisia	TUN
Ankara || Tehran	TUR
Türkiye	TUR
Ankara, Türkiye	TUR
Bursa, Türkiye	TUR
Hatay, Türkiye	TUR
Isparta, Türkiye	TUR
Istanbul	TUR
Istanbul	TUR
Istanbul - Turkey	TUR
Istanbul, Turkey	TUR
Kilis, Türkiye	TUR
Mardin, Türkiye	TUR
Mersin, Türkiye	TUR
Turkey	TUR
Turkey	TUR
Turkey Istanbul	TUR
Turkey, Istanbul	TUR
Türkiye	TUR
gaziantep	TUR
istanbul	TUR
turkey	TUR
turkey - istanbul	TUR
إسطنبول	TUR
إسطنبول	TUR
اسطنبول	TUR
اسطنبول	TUR
اسطنبول - تركيا	TUR
الخلافة التركية الإسلامية	TUR
تركيا	TUR
تركيا	TUR
تركيا - إسطنبول	TUR
تركيا مرسين	TUR
عين على تركيا	TUR
‏إسطنبول‏، ‏تركيا‏	TUR
Crimea Ukraine	UKR
Ukraine	UKR
أوكرانيا	UKR
Frezno. Usa. ,K	USA
Seattle,Washington,500wall st	USA
Acre, Israel_California, USA	USA
Alabama, USA	USA
America	USA
Anaheim hill, CA	USA
Aspen Hill, MD	USA
Austin, TX	USA
Brooklyn, NY	USA
California	USA
California, USA	USA
Chicago, IL	USA
Chicago,IL	USA
Cleveland, OH	USA
Columbia, KY	USA
Curva Sud	USA
East Los Angeles, CA	USA
Florida, USA	USA
Fort Worth, TX	USA
Georgia, USA	USA
Holland, MI	USA
Hollywood	USA
Illinois, USA	USA
Irvine, CA	USA
Los Angeles	USA
Los Angeles, CA	USA
Los Angeles, California	USA
Manhattan Beach, CA	USA
Medina, WA	USA
Mena, AR	USA
Meriden, CT USA	USA
Miami, FL	USA
Nevada, USA	USA
New Jersey, USA	USA
New York	USA
New York, NY	USA
New York, USA	USA
New York, United States	USA
Newton Junction, NH	USA
North Carolina, USA	USA
Nueva York, USA	USA
Ohio, USA	USA
Ontario	USA
Pennsylvania, USA	USA
Portland, OR	USA
Richmond, VA	USA
Roseau, MN	USA
San Diego California	USA
[truncated: 210 more rows]
